# Supplementary material for: Alkene isomerization/enamide-ene and diene metathesis for the construction of indoles, quinolines, benzofurans and chromenes with a chiral cyclopropane substituent
Source: Royal Society of Chemistry journal article supplement (doi:10.1039/c0ob00597e), 2010-12-22

## Supporting Information

### Alkene isomerization/enamide-ene and diene metathesis for the construction of indoles, quinolines, benzofurans and chromenes with a chiral cyclopropane substituent

Takaaki Kobayashi, Mitsuhiro Arisawa\* and Satoshi Shuto\*

Faculty of Pharmaceutical Sciences, Hokkaido University, Kita 12, Nishi 6, Kita-ku, Sapporo  
060-0812 Japan

shu@pharm.hokudai.ac.jp, arisawa@pharm.hokudai.ac.jp

#### Experimental Section

<sup>1</sup>H NMR spectra were recorded in CDCl<sub>3</sub> at 25 °C unless otherwise noted, at 500 MHz, with TMS as an internal standard. <sup>13</sup>C NMR spectra were recorded in CDCl<sub>3</sub> at 25 °C unless otherwise noted, at 125 MHz. All moisture-sensitive reactions were performed under an Ar atmosphere. Flash column chromatography was performed with silica gel 60 N (spherical, neutral, 40-50 mm, Kanto Chemical Co., Inc.). **A** and **B** were obtained commercially.

#### General Procedure for the Preparation of $\alpha$ , $\omega$ -Dienes derivatives (**6**).

A solution of aldehyde, aniline, and MS4A in Et<sub>2</sub>O (SM 0.2 M) was stirred at rt for 10 h. After addition of Et<sub>2</sub>O (SM 0.1 M), to the resulting solution was added BF<sub>3</sub>•Et<sub>2</sub>O at -40 °C, and the mixture was stirred at same temperature for 30 min. After addition of vinyl magnesium bromide (1.0 M in THF) or vinyl magnesium chloride (1.46 M in THF) at -40 °C, the mixture was heated gradually to 0 °C, and stirred for 15 h. After addition of sat. aq. NH<sub>4</sub>Cl, the mixture was partitioned between AcOEt and sat. aq. NH<sub>4</sub>Cl. The organic layers were washed with sat. aq. NaHCO<sub>3</sub>, brine, dried over Na<sub>2</sub>SO<sub>4</sub>, and concentrated in reduced pressure. The residue was purified by Flash silica gel column chromatography (hexane) to give the  $\alpha$ ,  $\omega$ -diene as a pale yellow oil.

**(1R,2R)-2-*t*-Butyldiphenylsilyloxymethyl-1-[1-(4-chloro-2-vinylphenylamino)prop-2-en-1-yl]cyclopropane (6g)**. **6g** (35 mg, 69.3  $\mu$ mol, 2 steps 69%, dr = 1 : 1) was prepared from (1R,2R)-2-(*tert*-butyldiphenylsilyloxy)methyl-1-formyl cyclopropane [Kazuta, Y. Matsuda, A. Shuto, S., *J. Org. Chem.* **2002**, *67*, 1669-1677.] (34 mg, 99.8  $\mu$ mol), 2-vinyl-4-chloroaniline [Lee, B. S.; Lee, J. H.; Chi, D. Y., *J. Org. Chem.*, **2002**, *67*, 7884-7886.] (16 mg, 102  $\mu$ mol), MS4A (33 mg), BF<sub>3</sub>•Et<sub>2</sub>O (60  $\mu$ L, 0.486 mmol), and vinyl magnesium bromide (1.00 M in THF, 230  $\mu$ L, 0.230 mmol). [ $\alpha$ ]<sub>D</sub><sup>21</sup> -12.7 (*c* 1.00, CHCl<sub>3</sub>); <sup>1</sup>H NMR (400 MHz, CDCl<sub>3</sub>, diastereo mixture)  $\delta$  7.68–7.66 (4H, m), 7.44–7.34 (6H, m), 7.22–7.20 (1H, m), 7.04–7.02 (1H, m), 6.73–6.64 (1H, m), 6.48–6.44 (1H, m), 5.81–5.73 (1H, m), 5.63–5.56 (1H, m), 5.31–5.12 (3H, m), 4.00 (1H, brs), 3.80–3.72

(1H, m), 3.41-3.21 (2H, m), 1.11-1.01 (10H, m), 0.98-0.92 (1H, m), 0.54-0.41 (2H, m);  $^{13}\text{C}$  NMR (100 MHz,  $\text{CDCl}_3$ )  $\delta$  143.09, 138.24, 137.87, 135.57, 135.55, 133.73, 133.69, 133.67, 131.67, 131.53, 129.63, 129.62, 128.19, 128.11, 127.66, 127.62, 126.77, 126.67, 125.56, 125.46, 121.96, 121.90, 117.33, 115.64, 115.43, 113.25, 113.20, 66.75, 66.48, 59.60, 59.00, 26.91, 26.86, 22.54, 22.11, 19.48, 19.22, 19.20, 18.57, 7.86, 7.67; LR-MS (FAB)  $m/z$  501 ( $\text{M}^+$ ); Anal. Calcd for  $\text{C}_{31}\text{H}_{36}\text{ClNOSi}$ : C, 74.15; H, 7.23; N, 2.79; found: C, 73.86; H, 7.33; N, 2.97.

***N*-(1-isopropylprop-2-en-1-yl)-2-vinylaniline (6e).** **6e** (63 mg, 0.313 mmol, 2 steps 43%, volatile) was prepared from isobutyraldehyde (66  $\mu\text{L}$ , 0.723 mmol), 2-vinylaniline [Lee, B. S.; Lee, J. H.; Chi, D. Y., *J. Org. Chem.*, **2002**, *67*, 7884-7886.] (91 mg, 0.764 mmol), MS4A (66 mg),  $\text{BF}_3 \cdot \text{Et}_2\text{O}$  (570  $\mu\text{L}$ , 4.62 mmol), and vinyl magnesium chloride (1.46 M in THF, 1.49 mL, 2.18 mmol).  $^1\text{H}$  NMR (500 MHz,  $\text{CDCl}_3$ )  $\delta$  7.23 (1H, d,  $J = 7.3$  Hz), 7.12 (1H, dd,  $J = 7.3, 7.1$  Hz), 6.78 (1H, dd,  $J = 17.4, 11.0$  Hz), 6.67 (1H, dd,  $J = 8.0, 7.1$  Hz), 6.59 (1H, d,  $J = 8.0$  Hz), 5.74 (1H, ddd,  $J = 16.9, 10.5, 6.0$  Hz), 5.61 (1H, dd,  $J = 17.4, 1.1$  Hz), 5.33 (1H, dd,  $J = 11.0, 1.1$  Hz), 5.20-5.16 (2H, m), 3.91 (1H, brs), 3.70 (1H, dd,  $J = 6.0, 5.0$  Hz), 1.94-1.87 (1H, m), 1.00 (3H, d,  $J = 6.9$  Hz), 0.98 (3H, d,  $J = 6.9$  Hz);  $^{13}\text{C}$  NMR (100 MHz,  $\text{CDCl}_3$ )  $\delta$  144.66, 137.69, 133.09, 128.70, 127.54, 124.04, 116.78, 116.22, 116.02, 111.62, 61.19, 32.47, 18.70, 18.62; LR-MS (EI)  $m/z$  201 ( $\text{M}^+$ ); HR-MS (EI) calcd for  $\text{C}_{14}\text{H}_{19}\text{N}$  201.1518, found 201.1517 ( $\text{M}^+$ )

***N*-(1-isobutylprop-2-enyl)-2-vinylaniline (6f).** **6f** (47 mg, 0.218 mmol, 2 steps 42%) was prepared from isovaleraldehyde (55  $\mu\text{L}$ , 0.513 mmol), 2-vinylaniline (64 mg, 0.537 mmol), MS4A (47 mg),  $\text{BF}_3 \cdot \text{Et}_2\text{O}$  (403  $\mu\text{L}$ , 3.27 mmol), and vinyl magnesium chloride (1.46 M in THF, 1.05 mL, 1.53 mmol).  $^1\text{H}$  NMR (500 MHz,  $\text{CDCl}_3$ )  $\delta$  7.24 (1H, d,  $J = 7.4$  Hz), 7.12 (1H, dd,  $J = 8.0, 7.4$  Hz), 6.76 (1H, dd,  $J = 17.2, 10.9$  Hz), 6.68 (1H, dd,  $J = 8.0, 7.4$  Hz), 6.62 (1H, d,  $J = 8.0$  Hz), 5.73 (1H, ddd,  $J = 17.2, 10.3, 6.3$  Hz), 5.60 (1H, d,  $J = 17.2$  Hz), 5.32 (1H, d,  $J = 10.9$  Hz), 5.19 (1H, d,  $J = 17.2$  Hz), 5.10 (1H, d,  $J = 10.3$  Hz), 3.92-3.89 (1H, m), 3.75 (1H, brs), 1.83-1.75 (1H, m), 1.53-1.42 (2H, m), 0.97 (3H, d,  $J = 6.9$  Hz), 0.92 (3H, d,  $J = 6.9$  Hz);  $^{13}\text{C}$  NMR (125 MHz,  $\text{CDCl}_3$ )  $\delta$  144.52, 140.28, 133.02, 128.73, 127.45, 124.02, 116.90, 116.25, 114.77, 111.65, 54.01, 45.39, 24.77, 22.74, 22.61; LR-MS (EI)  $m/z$  215 ( $\text{M}^+$ ); Anal. Calcd for  $\text{C}_{15}\text{H}_{21}\text{N} + 0.1\text{H}_2\text{O}$ : C, 82.97; H, 9.84; N, 6.45; found: C, 83.27; H, 9.94; N, 6.39.

***N*-(1-cyclopropylprop-2-en-1-yl)-2-vinylaniline (6h).** **6h** (103 mg, 0.517 mmol, 2 steps 31%) was prepared from cyclopropanecarboxaldehyde (125  $\mu\text{L}$ , 1.67 mmol), 2-vinylaniline (210 mg, 1.76 mmol), MS4A (125 mg),  $\text{BF}_3 \cdot \text{Et}_2\text{O}$  (103  $\mu\text{L}$ , 0.834 mmol), and vinyl magnesium chloride (1.46 M in THF, 2.30 mL, 3.36 mmol).  $^1\text{H}$  NMR (500 MHz,  $\text{CDCl}_3$ )  $\delta$  7.25 (1H, d,  $J = 8.0$  Hz), 7.11 (1H, dd,  $J = 8.0, 7.4$  Hz), 6.82 (1H, dd,  $J = 17.2, 10.9$  Hz), 6.69 (1H, dd,  $J = 8.0, 7.4$  Hz), 6.56 (1H, d,  $J = 8.0$  Hz), 5.83 (1H, ddd,  $J = 17.2, 10.3, 5.7$  Hz), 5.63 (1H, dd,  $J = 17.2, 1.7$  Hz), 5.33 (1H, dd,  $J = 10.9, 1.7$  Hz), 5.24 (1H, dd,  $J = 17.2, 1.2$  Hz), 5.14 (1H, dd,  $J = 10.3, 1.2$  Hz), 4.08 (1H, brs), 3.27 (1H, dd,  $J = 5.7,$

5.7 Hz), 1.09-1.01 (1H, m), 0.60-0.53 (2H, m), 0.39-0.32 (2H, m);  $^{13}\text{C}$  NMR (125 MHz,  $\text{CDCl}_3$ )  $\delta$  144.65, 138.56, 133.01, 128.64, 127.30, 124.08, 117.11, 116.15, 115.23, 111.95, 60.11, 16.77, 3.27, 2.56; ; LR-MS (EI)  $m/z$  199 ( $\text{M}^+$ ); Anal. Calcd for  $\text{C}_{14}\text{H}_{17}\text{N} + 0.1\text{H}_2\text{O}$ : C, 83.62; H, 8.62; N, 6.97; found: C, 83.65; H, 8.82; N, 6.81.

**(1*R*,2*R*)-2-*t*-Butyldiphenylsilyloxymethyl-1-[1-(2-vinylphenylamino)prop-2-en-1-yl]cyclopropane**

**(6i).** **6i** (122 mg, 0.261 mmol, 2 steps 26%, dr = 1 : 1) was prepared from (1*R*, 2*R*)-2-(*tert*-butyldiphenylsilyloxy)methyl-1-formyl cyclopropane [Kazuta, Y. Matsuda, A. Shuto, S., *J. Org. Chem.* **2002**, *67*, 1669-1677.] (339 mg, 1.00 mmol), 2-vinylaniline (125 mg, 1.05 mmol), MS4A (340 mg),  $\text{BF}_3 \cdot \text{Et}_2\text{O}$  (1.57  $\mu\text{L}$ , 2.29 mmol), and vinyl magnesium chloride (1.46 M in THF, 1.57 mL, 2.29 mmol).  $[\alpha]_{\text{D}}^{22}$  -9.1 ( $c$  1.00,  $\text{CHCl}_3$ );  $^1\text{H}$  NMR (400 MHz,  $\text{CDCl}_3$ , diastereomixture);  $\delta$  7.68-7.66 (4H, m), 7.42-7.36 (6H, m), 7.26-7.24 (1H, m), 7.12-7.08 (1H, m), 6.77 (1H, ddd,  $J$  = 16.7, 10.9, 5.0 Hz), 6.71 (1H, m), 6.57-6.54 (1H, m), 5.85-5.77 (1H, m), 5.62-5.56 (1H, m), 5.29-5.11 (3H, m), 4.02 (1H, brs), 3.78-3.71 (1H, m), 3.43-3.28 (2H, m), 1.10-0.96 (11H, m), 0.53-0.49 (1H, m), 0.47-0.42 (1H, m);  $^{13}\text{C}$  NMR (125 MHz,  $\text{CDCl}_3$ , diastereomixture)  $\delta$  144.57, 138.70, 138.39, 135.58, 133.76, 133.73, 132.85, 132.70, 129.60, 128.65, 128.58, 127.65, 127.62, 127.23, 127.12, 124.16, 124.06, 117.16, 117.12, 116.17, 115.37, 115.21, 112.03, 111.97, 66.78, 66.56, 59.42, 58.97, 26.92, 26.87, 22.57, 22.24, 19.41, 19.22, 19.21, 18.67, 7.91, 7.66; LR-MS (ESI)  $m/z$  468 [( $\text{M}+\text{H}$ ) $^+$ ]; HR-MS (ESI) calcd for  $\text{C}_{31}\text{H}_{38}\text{NOSi}$  468.2723, found 468.2716 [( $\text{M}+\text{H}$ ) $^+$ ]; Anal. Calcd for  $\text{C}_{31}\text{H}_{37}\text{NOSi}$ : C, 79.61; H, 7.97; N, 2.99; found: C, 79.41; H, 8.13; N, 2.97;

**(1*S*,2*R*)-2-*t*-Butyldiphenylsilyloxymethyl-1-[1-(2-vinylphenylamino)prop-2-en-1-yl]cyclopropane**

**(6j).** **6j** (120 mg, 0.255 mmol, 2 steps 14%, dr = 4 : 1) was prepared from (1*S*, 2*R*)-2-(*tert*-butyldiphenylsilyloxy)methyl-1-formyl cyclopropane [Kazuta, Y. Matsuda, A. Shuto, S., *J. Org. Chem.* **2002**, *67*, 1669-1677.] (600 mg, 1.77 mmol), 2-vinylaniline (232 mg, 1.95 mmol), MS4A (600 mg),  $\text{BF}_3 \cdot \text{Et}_2\text{O}$  (218  $\mu\text{L}$ , 1.77 mmol), and vinyl magnesium chloride (1.46 M in THF, 2.42 mL, 3.53 mmol).  $[\alpha]_{\text{D}}^{23}$  -9.2 ( $c$  1.00,  $\text{CHCl}_3$ );  $^1\text{H}$  NMR (400 MHz,  $\text{CDCl}_3$ , 4:1 diastereo mixture);  $\delta$  7.71-7.21 (11H, m), 7.11-7.08 (1H, m), 6.83-6.76 (1H, m), 6.72-6.68 (1H, m), 6.54 (1H x 0.8, d,  $J$  = 8.2 Hz), 6.48 (1H x 0.2, d,  $J$  = 8.2 Hz), 6.19-6.11 (1H x 0.2, m), 5.88 (1H x 0.8, ddd,  $J$  = 16.8, 10.0, 5.9 Hz), 5.62 (1H x 0.2, d,  $J$  = 17.7 Hz), 5.54 (1H x 0.8, d,  $J$  = 17.2 Hz), 5.32-5.08 (3H, m), 4.13 (1H, brs), 3.91 (1H x 0.2, dd,  $J$  = 11.3, 5.9 Hz), 3.72-3.69 (1H x 0.8, m), 3.63-3.58 (1H, m), 3.44-3.41 (1H x 0.2, m), 3.36-3.32 (1H x 0.8, m), 1.13-1.26 (1H, m), 1.17-1.10 (1H, m), 1.08 (9H x 0.2, s), 0.95 (9H x 0.8), 0.81-0.71 (1H, m), 0.28-0.21 (1H, m);  $^{13}\text{C}$  NMR (100 MHz,  $\text{CDCl}_3$ )  $\delta$  144.70, 144.33, 140.03, 139.52, 135.61, 135.55, 135.48, 133.64, 133.61, 133.54, 133.50, 133.00, 132.78, 129.62, 129.47, 129.42, 128.62, 128.45, 127.67, 127.64, 127.56, 127.53, 127.23, 127.07, 124.34, 123.97, 117.37, 117.06, 116.08, 115.72, 114.56, 113.91, 112.55, 112.05, 63.89, 62.92, 56.55, 55.76, 26.97, 26.84, 22.63, 22.63, 19.18, 19.00, 18.80, 18.63, 7.69, 7.61; LR-MS (ESI)  $m/z$  468 [( $\text{M}+\text{H}$ ) $^+$ ]; HR-MS (ESI)

calcd for C<sub>31</sub>H<sub>38</sub>NOSi 468.2723, found 468.2721 [(M+H)<sup>+</sup>]; Anal. Calcd for C<sub>31</sub>H<sub>37</sub>NOSi + 0.1 H<sub>2</sub>O: C, 79.30; H, 7.99; N, 2.98; found: C, 79.11; H, 8.17; N, 2.91;

#### General procedure for the preparation of the *N*-acetylidole derivatives (**5B**).

Acetylation: A solution of  $\alpha$ ,  $\omega$ -diene (**6**), *N,N*-diisopropylethylamine (10 eq.), and acetic anhydride (10 eq.) in toluene (SM 0.1M) was refluxed for 24 h. After cooling and addition of sat. aq. NaHCO<sub>3</sub>, the reaction mixture was partitioned between AcOEt and sat. aq. NaHCO<sub>3</sub>. The organic layers were washed with sat. aq. NH<sub>4</sub>Cl, brine, dried over Na<sub>2</sub>SO<sub>4</sub>, and concentrated in reduced pressure. The residue was purified by silica gel column chromatography to give *N*-acetyl derivative (**3B**) as a yellow oil.

Isomerization and RCM: The mixture of the corresponding **3B** and Ru(CO)HCl(PPh<sub>3</sub>)<sub>3</sub> (20 mol%) in xylene (SM 0.1 M) was refluxed for 24 h. After cooling, Grubbs' 2nd cat. (20 mol%) was added, and the resulting mixture was stirred at 120 °C for 5 h. After cooling, the solvent was concentrated in reduced pressure. The residue was purified by silica gel column chromatography to give the *N*-acetylidole derivative (**5B**) as a colorless oil.

#### (**1R,2R**)-2-*t*-Butyldiphenylsilyloxymethyl-1-(5-chloro-*N*-acetylidole-2-yl)cyclopropane (**5Bg**).

Acetylation: **3Bg** (21 mg, 38.4  $\mu$ mol, 91%) was prepared from **6g** (21 mg, 42.2  $\mu$ mol).

Isomerization-RCM: **5Bg** (15 mg, 29.5  $\mu$ mol, 2 steps 68%) was prepared from **3Bg** (24 mg, 43.3  $\mu$ mol). After isomerization, the solvent was concentrated in reduced pressure. The residue was purified by silica gel column chromatography (hexane : AcOEt = 8 : 1) to give an enamide derivative (**4Bg**). Then RCM was carried out with the enamide in toluene at 120 °C.

:  $[\alpha]_D^{21}$  -41.2 (*c* 1.02, CHCl<sub>3</sub>); <sup>1</sup>H NMR (500 MHz, CDCl<sub>3</sub>)  $\delta$  8.24 (1H, d, *J* = 8.6 Hz), 7.67 (4H, m), 7.45-7.37 (7H, m), 7.20 (1H, d, *J* = 8.6 Hz), 6.23 (1H, s), 3.93 (1H, dd, *J* = 10.9, 4.0 Hz), 3.69 (1H, dd, *J* = 10.9, 5.7 Hz), 2.76 (3H, s), 1.98-1.96 (1H, m), 1.54-1.51 (1H, m), 1.07 (9H, s), 0.99-0.94 (2H, m); <sup>13</sup>C NMR (125 MHz, CDCl<sub>3</sub>)  $\delta$  170.50, 142.59, 135.64, 135.58, 135.56, 133.40, 133.35, 130.19, 129.79, 128.76, 127.73, 127.72, 124.26, 119.27, 117.41, 107.84, 64.93, 27.21, 26.83, 23.96, 19.21, 16.63, 11.92; LR-MS (EI) *m/z* 501 (M<sup>+</sup>); HR-MS (EI) calcd for C<sub>30</sub>H<sub>32</sub>ClNO<sub>2</sub>Si 501.1891, found 501.1896 (M<sup>+</sup>)

#### 2-Isobutyl-*N*-acetylidole (**5Bf**).

Acetylation: **3Bf** (80 mg, 0.311 mmol, 71%) was prepared from **6f** (94 mg, 0.436 mmol).

Isomerization-RCM: **5Bf** (4 mg, 17.2  $\mu$ mol, 2 steps 27%) was prepared from **3Bf** (17 mg, 64.5  $\mu$ mol). After isomerization reaction, the solvent was concentrated in reduced pressure. The residue was purified by silica gel column chromatography (hexane : AcOEt = 4 : 1) to give an enamide derivative (**4Bf**). Then RCM was carried out with the enamide in toluene at 120 °C.

: <sup>1</sup>H NMR (400 MHz, CDCl<sub>3</sub>)  $\delta$  7.80 (1H, d, *J* = 7.7 Hz), 7.50-7.48 (1H, m), 7.26-7.20 (2H, m),

6.38 (1H, s), 2.87 (2H, d,  $J = 6.8$  Hz), 2.76 (3H, s), 2.02-1.96 (1H, m), 0.97 (6H, d,  $J = 6.8$  Hz);  $^{13}\text{C}$  NMR (100 MHz,  $\text{CDCl}_3$ )  $\delta$  170.36, 141.69, 136.31, 129.85, 123.33, 122.91, 120.19, 114.62, 109.63, 39.45, 27.78, 27.64, 22.51; LR-MS (EI)  $m/z$  215 ( $\text{M}^+$ ); Anal. Calcd for  $\text{C}_{14}\text{H}_{17}\text{NO} + 0.1 \text{ H}_2\text{O}$ : C, 77.46; H, 7.99; N, 6.45; found: C, 77.67; H, 8.15; N, 6.11;

#### 2-cyclopropyl-*N*-acetylindole (5Bh)

Acetylation: **3Bh** (29 mg, 0.118 mmol, 92%) was prepared from **6h** (26 mg, 0.128 mmol).

Isomerization-RCM: **5Bh** (9 mg, 43.7  $\mu\text{mol}$ , 2 steps 70%) was prepared from **3Bh** (15 mg, 62.2  $\mu\text{mol}$ ).

:  $^1\text{H}$  NMR (500 MHz,  $\text{CDCl}_3$ )  $\delta$  8.29 (1H, d,  $J = 8.3$  Hz), 7.43 (1H, d,  $J = 7.7$  Hz), 7.29-7.20 (2H, m), 6.35 (1H, s), 2.86 (3H, s), 2.14-2.09 (1H, m), 1.09-1.06 (2H, m), 0.88-0.86 (2H, m);  $^{13}\text{C}$  NMR (125 MHz,  $\text{CDCl}_3$ )  $\delta$  170.70, 142.31, 137.28, 128.98, 124.29, 123.36, 119.86, 116.27, 108.65, 27.24, 11.67, 8.48; LR-MS (EI)  $m/z$  199 ( $\text{M}^+$ ); HR-MS (EI) calcd for  $\text{C}_{13}\text{H}_{13}\text{NO}$  199.0997, found 199.0997 ( $\text{M}^+$ );

#### General procedure for the preparation of the *N*-formylindole derivatives (5D).

Formylation: A mixture of acetic anhydride (5 eq.) and formic acid (6 eq.) was stirred at 60 °C for 3 h. After cooling, to the resulting mixture was added  $\alpha$ ,  $\omega$ -diene (**6**) in THF (SM 0.1 M) at 0 °C. The mixture was heated gradually to 60 °C and stirred for 15 h. After cooling, toluene was added to the reaction mixture, then the solvent was concentrated in reduced pressure (x2). The residue was purified by silica gel column chromatography to give corresponding *N*-formyl derivative (**3D**) as a yellow oil.

Isomerization and RCM: The mixture of the **3D** and  $\text{Ru}(\text{CO})\text{HCl}(\text{PPh}_3)_3$  (20 mol%) in xylene (SM 0.1 M) was refluxed for 24 h. After cooling, Grubbs' 2nd cat. (20 mol%) was added, and the resulting mixture was stirred at 120 °C for 4 h. After cooling, the solvent was concentrated in reduced pressure. The residue was purified by silica gel column chromatography to give the *N*-formylindole derivative (**5D**) as a colorless oil.

#### 2-isopropyl-*N*-formylindole (5De).

Formylation: **3De** (71 mg, 0.311 mmol, quant.) was prepared from **6e** (63 mg, 0.311 mmol).

Isomerization and RCM: **5De** (3 mg, 16.0  $\mu\text{mol}$ , 2 steps 23%) was prepared from **3De** (16 mg, 69.3  $\mu\text{mol}$ ).

:  $^1\text{H}$  NMR (400 MHz,  $\text{CDCl}_3$ , 55 °C);  $\delta$  9.35 (1H, s), 8.25 (1H, brs), 7.47-7.44 (1H, m), 7.29-7.22 (2H, m), 6.39 (1H, s), 3.37-3.30 (1H, m), 1.39-1.38 (6H, d,  $J = 6.8$  Hz);  $^{13}\text{C}$  NMR (100 MHz,  $\text{CDCl}_3$ , 55 °C)  $\delta$  158.34, 146.56, 135.85, 129.87, 124.38, 124.23, 120.18, 115.01 (br), 105.83, 26.08, 22.62; LR-MS (EI)  $m/z$  187 ( $\text{M}^+$ ); Anal. Calcd for  $\text{C}_{12}\text{H}_{13}\text{NO}$ : C, 76.98; H, 7.00; N, 7.48; found: C, 76.69; H, 7.16; N, 7.21;

#### 2-isobutyl-*N*-formylindole (5Df).

Formylation: **3Df** (54 mg, 0.220 mmol, 95%) was prepared from **6f** (50 mg, 0.232 mmol).

Isomerization and RCM: **5Df** (17 mg, 82.5  $\mu$ mol, 2 steps 94%) was prepared from **3Df** (21 mg, 87.9  $\mu$ mol).

:  $^1\text{H}$  NMR (500 MHz,  $\text{CDCl}_3$ , 60  $^\circ\text{C}$ )  $\delta$  9.30 (1H, s), 8.27 (1H, brs), 7.45 (1H, d,  $J = 6.9$  Hz), 7.28-7.23 (2H, m), 6.35 (1H, s), 2.78 (2H, d,  $J = 7.4$  Hz), 2.03-1.98 (1H, m), 1.02 (6H, d,  $J = 6.9$  Hz);  $^{13}\text{C}$  NMR (125 MHz,  $\text{CDCl}_3$ , 50  $^\circ\text{C}$ )  $\delta$  158.39, 138.94, 135.64, 129.86, 124.34, 124.27, 120.02, 115.18 (br), 109.40, 36.35, 28.42, 22.49; LR-MS (EI)  $m/z$  201 ( $\text{M}^+$ ); HR-MS (EI) calcd for  $\text{C}_{13}\text{H}_{15}\text{NO}$  201.1154, found 201.1152 ( $\text{M}^+$ );

#### 2-cyclopropyl-*N*-formylindole (**5Dh**)

Formylation: **3Dh** (54 mg, 0.236 mmol, 94%) was prepared from **6h** (50 mg, 0.251 mmol).

Isomerization and RCM: **5Dh** (14 mg, 73.4  $\mu$ mol, 2 steps 99%) was prepared from **3Dh** (17 mg, 73.9  $\mu$ mol).

:  $^1\text{H}$  NMR (500 MHz,  $\text{CDCl}_3$ , 55  $^\circ\text{C}$ )  $\delta$  9.60 (1H, s), 8.33 (1H, brd,  $J = 7.4$  Hz), 7.42 (1H, d,  $J = 7.4$  Hz), 7.29-7.21 (2H, m), 6.27 (1H, s), 2.03-1.97 (1H, m), 1.05-1.01 (2H, m), 0.84-0.81 (2H, m);  $^{13}\text{C}$  NMR (125 MHz,  $\text{CDCl}_3$ , 55  $^\circ\text{C}$ )  $\delta$  159.07, 141.64, 135.51, 129.72, 124.70, 124.33, 120.16, 115.52 (br), 107.32, 107.28, 7.26, 6.73; LR-MS (EI)  $m/z$  185 ( $\text{M}^+$ ); HR-MS (EI) calcd for  $\text{C}_{12}\text{H}_{11}\text{NO}$  185.0841, found 185.0843 ( $\text{M}^+$ ); Anal. Calcd for  $\text{C}_{12}\text{H}_{11}\text{NO} + 0.2 \text{H}_2\text{O}$ : C, 76.33; H, 6.09; N, 7.42; found: C, 76.73; H, 6.12; N, 7.04;

#### (1*R*,2*R*)-2-*t*-Butyldiphenylsilyloxymethyl-1-(*N*-formylindole-2-yl)cyclopropane (**5Di**)

Formylation: **3Di** (743 mg, 1.50 mmol, 85%) was prepared from **6i** (824 mg, 1.76 mmol).

Isomerization and RCM: **5Di** (24 mg, 52.7  $\mu$ mol, 2 steps 87%, colorless oil) was prepared from **3Di** (30 mg, 60.5  $\mu$ mol).

:  $[\alpha]_{\text{D}}^{22}$  3.5 ( $c$  0.82,  $\text{CHCl}_3$ );  $^1\text{H}$  NMR (500 MHz,  $\text{CDCl}_3$ , 55  $^\circ\text{C}$ )  $\delta$  9.68 (1H, s), 8.36 (1H, brd,  $J = 8.0$  Hz), 7.69-7.67 (4H, m), 7.44-7.36 (7H, m), 7.30-7.21 (2H, m), 6.24 (1H, s), 3.99 (1H, dd,  $J = 10.9, 4.6$  Hz), 3.49 (1H, dd,  $J = 10.9, 6.9$  Hz), 1.93-1.90 (1H, m), 1.49-1.43 (1H, m), 1.11 (9H, s), 1.05-1.01 (1H, m), 0.97-0.93 (1H, m);  $^{13}\text{C}$  NMR (125 MHz,  $\text{CDCl}_3$ , 55  $^\circ\text{C}$ )  $\delta$  159.55, 140.67, 135.65, 135.47, 133.64, 133.56, 129.83, 129.67, 127.80, 124.74, 124.29, 120.11, 115.70 (br), 107.48, 107.44, 66.09, 26.96, 23.02, 19.26, 12.90, 10.65; LR-MS (ESI)  $m/z$  476 [ $(\text{M}+\text{Na})^+$ ]; HR-MS (ESI) calcd for  $\text{C}_{29}\text{H}_{31}\text{NNaO}_2\text{Si}$  476.2022, found 476.2023 [ $(\text{M}+\text{Na})^+$ ]; Anal. Calcd for  $\text{C}_{29}\text{H}_{31}\text{NO}_2\text{Si}$ : C, 76.78; H, 6.89; N, 3.09; found: C, 76.57; H, 7.02; N, 3.00;

#### (1*R*,2*R*)-2-*t*-Butyldiphenylsilyloxymethyl-1-(5-chloro-*N*-tosylindole-2-yl)cyclopropane (**7**)

A mixture of **5Bg** (13 mg, 26.7  $\mu$ mol) and potassium carbonate (18 mg, 0.133 mmol) in THF (80  $\mu$ L) and MeOH (800  $\mu$ L) was stirred at rt for 1 h. After addition of sat. aq.  $\text{NH}_4\text{Cl}$ , the solvent was concentrated in reduced pressure. The residue was partitioned between AcOEt and sat. aq.  $\text{NH}_4\text{Cl}$ . The organic layer was separated and washed with brine, dried over  $\text{Na}_2\text{SO}_4$ , and concentrated in reduced

pressure. To a solution of the residue in THF (270  $\mu$ L) was added NaH (60% in mineral oil, 1 mg, 35.0  $\mu$ mol) and tosyl chloride (6 mg, 29.4  $\mu$ mol) and the mixture was stirred for 3 h. NaH (60% in mineral oil, 1 mg, 35.0  $\mu$ mol) and tosyl chloride (6 mg, 29.4  $\mu$ mol) was added to the mixture again and stirred for 5 h. After addition of sat. aq.  $\text{NH}_4\text{Cl}$ , the solvent was concentrated in reduced pressure. The residue was partitioned between AcOEt and sat. aq.  $\text{NH}_4\text{Cl}$ . The organic layer was separated and washed with brine, dried over  $\text{Na}_2\text{SO}_4$ , and concentrated in reduced pressure. The residue was purified by silica gel column chromatography (hexane : AcOEt = 40 : 1) to give **7** (10 mg, 16.9  $\mu$ mol, 2 steps 63%) as a pale yellow oil.  $[\alpha]_{\text{D}}^{21}$  -87.0 (*c* 1.02,  $\text{CHCl}_3$ );  $^1\text{H}$  NMR (500 MHz,  $\text{CDCl}_3$ )  $\delta$  8.10 (1H, d,  $J$  = 8.9 Hz), 7.71-7.67 (4H, m), 7.61 (2H, d,  $J$  = 8.2 Hz), 7.44-7.37 (6H, m), 7.34 (1H, d,  $J$  = 1.7 Hz), 7.20 (1H, dd,  $J$  = 8.9, 1.7 Hz), 7.11 (2H, d,  $J$  = 8.2 Hz), 6.10 (1H, s), 3.86 (1H, dd,  $J$  = 10.6, 4.6 Hz), 3.72 (1H, dd,  $J$  = 10.6, 5.4 Hz), 2.39-2.36 (1H, m), 2.32 (3H, s), 1.37-1.33 (1H, m), 1.07 (9H, s), 1.03-0.99 (1H, m), 0.75-0.72 (1H, m);  $^{13}\text{C}$  NMR (125 MHz,  $\text{CDCl}_3$ )  $\delta$  144.77, 144.70, 136.12, 135.55, 135.51, 133.58, 133.53, 130.54, 129.67, 129.62, 128.95, 127.64, 126.27, 123.77, 119.58, 115.43, 105.51, 64.51, 26.80, 24.00, 21.42, 19.21, 13.71, 12.75; LR-MS (ESI)  $m/z$  636  $[(\text{M}+\text{Na})^+]$ ; HR-MS (ESI) calcd for  $\text{C}_{35}\text{H}_{36}\text{ClNNaO}_3\text{SSi}$  636.1771, found: 636.1764

**(1R,2R)-1-(5-Chloro-N-tosylindole-2-yl)-2-hydroxymethyl cyclopropane (8)**

The mixture of **7** (377 mg, 0.614 mmol) and tetrabutylammonium fluoride (1.0 M in THF, 0.920 mL, 0.920 mmol) in THF (8.8 mL) was stirred at rt for 2 h. After addition of sat. aq.  $\text{NH}_4\text{Cl}$ , the reaction mixture was partitioned between AcOEt and sat. aq.  $\text{NH}_4\text{Cl}$ . The organic layer was separated and washed with brine, dried over  $\text{Na}_2\text{SO}_4$ , and concentrated in reduced pressure. The residue was purified by silica gel column chromatography (hexane : AcOEt = 4 : 1 = 2 : 1) to give **8** (227 mg, 0.605 mmol, 99%) as a pale yellow oil.  $[\alpha]_{\text{D}}^{21}$  -97.2 (*c* 1.01,  $\text{CHCl}_3$ );  $^1\text{H}$  NMR (500 MHz,  $\text{CDCl}_3$ )  $\delta$  8.00 (1H, d,  $J$  = 8.9 Hz), 7.67 (2H, d,  $J$  = 8.3 Hz), 7.34 (1H, d,  $J$  = 2.0 Hz), 7.22 (2H, d,  $J$  = 8.3 Hz), 7.20 (1H, dd,  $J$  = 8.9, 2.0 Hz), 6.19 (1H, s), 3.92 (1H, dd,  $J$  = 11.5, 4.3 Hz), 3.35 (1H, dd,  $J$  = 11.5, 8.6 Hz), 2.76 (1H, brs), 2.34 (3H, s), 2.24-2.20 (1H, m), 1.44-1.37 (1H, m), 1.11-1.07 (1H, m), 0.96-0.92 (1H, m);  $^{13}\text{C}$  NMR (125 MHz,  $\text{CDCl}_3$ )  $\delta$  145.17, 143.84, 135.61, 135.36, 130.50, 129.94, 129.27, 126.32, 124.21, 119.90, 115.43, 106.73, 66.35, 25.36, 21.53, 16.40, 10.58; LR-MS (EI)  $m/z$  398  $[(\text{M}+\text{Na})^+]$ ; HR-MS (ESI) calcd for  $\text{C}_{19}\text{H}_{18}\text{ClNNaO}_3\text{S}$  398.0594, found 398.0597  $[(\text{M}+\text{Na})^+]$ ; Anal. Calcd for  $\text{C}_{19}\text{H}_{18}\text{ClNO}_3\text{S} + 0.6 \text{H}_2\text{O}$ : C, 59.02; H, 5.00; N, 3.62; found: C, 58.63; H, 4.71; N, 3.49.

**(1R,2R)-2-(4-Chlorobenzylaminomethyl)-1-(5-Chloro-N-tosylindole-2-yl) cyclopropane (9)**

The mixture of **8** (70 mg, 0.186 mmol) and Dess-Martin periodinane (118 mg, 0.278 mmol) in  $\text{CH}_2\text{Cl}_2$  (2.3 mL) was stirred at rt for 4 h. After addition of sat. aq.  $\text{Na}_2\text{S}_2\text{O}_4$  /  $\text{NaHCO}_3$  (1 / 1), the reaction mixture was partitioned between  $\text{CH}_2\text{Cl}_2$  and sat. aq.  $\text{Na}_2\text{S}_2\text{O}_4$  /  $\text{NaHCO}_3$  (1 / 1). The organic layer was

separated and washed with brine, dried over  $\text{Na}_2\text{SO}_4$ , and concentrated in reduced pressure. To a mixture of the residue, 4-chlorobenzylamine (113  $\mu\text{L}$ , 0.924 mmol) and MS4A (70 mg) in  $\text{CH}_2\text{Cl}_2$  (9.3 mL) was added sodium triacetoxyborohydride (47 mg, 0.222 mmol) at rt and the mixture was stirred for 3 h. After addition of sat. aq.  $\text{NaHCO}_3$ , the reaction mixture was partitioned between AcOEt and sat. aq.  $\text{NaHCO}_3$ . The organic layer was separated and washed with brine, dried over  $\text{Na}_2\text{SO}_4$ , and concentrated in reduced pressure. The residue was purified by silica gel column chromatography (hexane : AcOEt = 5 : 1 = 1 : 2) to give **9** (70 mg, 0.140 mmol, 2 steps 75%) as a pale white oil.  $[\alpha]_{\text{D}}^{22}$  -148.2 (*c* 1.01,  $\text{CHCl}_3$ );  $^1\text{H}$  NMR (400 MHz,  $\text{CDCl}_3$ )  $\delta$  8.03 (1H, d,  $J$  = 9.1 Hz), 7.63 (2H, d,  $J$  = 8.4 Hz), 7.32 (1H, d,  $J$  = 1.8 Hz), 7.29-7.16 (7H, m), 6.12 (1H, s), 3.81 (1H, d,  $J$  = 13.5 Hz), 3.77 (1H, d,  $J$  = 13.5 Hz), 2.73 (1H, dd,  $J$  = 12.2, 6.1 Hz), 2.63 (1H, dd,  $J$  = 12.2, 7.0 Hz), 2.48 (1H, brs), 2.32 (3H, s), 2.25-2.20 (1H, m), 1.38-1.30 (1H, m), 0.93-0.84 (2H, m);  $^{13}\text{C}$  NMR (100 MHz,  $\text{CDCl}_3$ )  $\delta$  144.94, 144.50, 138.62, 135.87, 135.39, 132.49, 130.53, 129.78, 129.39, 129.12, 128.42, 126.29, 12.396, 119.72, 115.43, 105.75, 52.89, 23.10, 21.50, 15.99, 13.08; LR-MS (ESI)  $m/z$  499  $[(\text{M}+\text{H})^+]$ ; HR-MS (ESI) calcd for  $\text{C}_{26}\text{H}_{25}\text{Cl}_2\text{N}_2\text{O}_2\text{S}$ , found  $[(\text{M}+\text{H})^+]$ ; Anal. Calcd for  $\text{C}_{26}\text{H}_{24}\text{Cl}_2\text{N}_2\text{O}_2\text{S} + 0.1 \text{H}_2\text{O}$ : C, 62.08; H, 4.89; N, 5.57; found: C, 61.84; H, 4.89; N, 5.37.

**(1R,2R)-2-(4-Chlorobenzylaminomethyl)-1-(5-Chloroindole-2-yl) cyclopropane (2a)**

A mixture of **9** (70 mg, 0.140 mmol) and potassium hydroxide (157 mg, 2.80 mmol) in EtOH (1.4 mL) was refluxed for 3 h. After cooling sat. aq.  $\text{NH}_4\text{Cl}$  and sat. aq.  $\text{NaHCO}_3$  was added to the reaction mixture, and EtOH was concentrated in reduced pressure. The residue was partitioned between AcOEt and sat. aq.  $\text{NaHCO}_3$ . The organic layer was separated and washed with brine, dried over  $\text{Na}_2\text{SO}_4$ , and concentrated in reduced pressure. The residue was purified by silica gel column chromatography ( $\text{CHCl}_3$  : MeOH = 1 : 0 – 98 : 2) to give **2a** (47 mg, 0.136 mmol, 97%, free amine) as a pale yellow oil. The free amine (11 mg, 32.7  $\mu\text{mol}$ ) was dissolved in 1 M HCl in EtOH (650  $\mu\text{L}$ ), and the solution was evaporated. The resulting residue was triturated with  $\text{Et}_2\text{O}$  to give **2a** (13 mg, 32.7  $\mu\text{mol}$ , hydrochloride) as a pale red hygroscopic amorphous solid.  $[\alpha]_{\text{D}}^{21}$  -65.8 (*c* 1.00,  $\text{CH}_3\text{OH}$ , hydrochloride);  $^1\text{H}$  NMR (500 MHz,  $\text{CDCl}_3$ , hydrochloride)  $\delta$  10.34 (1H, s), 9.99 (1H, brs), 9.75 (1H, brs), 7.45 (2H, d,  $J$  = 8.0 Hz), 7.37 (1H, d,  $J$  = 2.0 Hz), 7.33 (2H, d,  $J$  = 8.0 Hz), 7.14 (1H, d,  $J$  = 8.6 Hz), 6.99 (1H, dd,  $J$  = 8.6, 2.0 Hz), 5.63 (1H, s), 3.90-3.88 (1H, m), 3.82-3.79 (1H, m), 3.12 (1H, brs), 2.02 (1H, brs), 1.86 (1H, brs), 0.85 (2H, brs), 0.59 (1H, brs);  $^{13}\text{C}$  NMR (125 MHz,  $\text{CDCl}_3$ , hydrochloride)  $\delta$  139.43, 136.05, 134.34, 131.65, 129.50, 129.15, 127.75, 124.83, 121.24, 119.31, 111.35, 97.41, 50.04, 49.82, 17.56, 16.75, 10.39; LR-MS (ESI)  $m/z$  345  $[(\text{M}+\text{H}-\text{HCl})^+]$ ; HR-MS (ESI) calcd for  $\text{C}_{19}\text{H}_{19}\text{Cl}_2\text{N}_2$  345.0925, found: 345.0917; Anal. Calcd for  $\text{C}_{19}\text{H}_{19}\text{Cl}_3\text{N}_2 + 0.4\text{H}_2\text{O}$  (hydrochloride): C, 58.67; H, 5.13; N, 7.20; found: C, 58.71; H, 5.18; N, 6.93.



**(1R,2R)-1-(5-Chloro-N-tosylindole-2-yl)-2-[(E, Z)-2-methoxyethenyl] cyclopropane (10)**

The mixture of **8** (73 mg, 0.194 mmol) and Dess-Martin periodinane (124 mg, 0.292 mmol) in CH<sub>2</sub>Cl<sub>2</sub> (2.4 mL) was stirred at rt for 2 h. After addition of sat. aq. Na<sub>2</sub>S<sub>2</sub>O<sub>4</sub> / NaHCO<sub>3</sub> (1 / 1), the reaction mixture was partitioned between CH<sub>2</sub>Cl<sub>2</sub> and sat. aq. Na<sub>2</sub>S<sub>2</sub>O<sub>4</sub> / NaHCO<sub>3</sub> (1 / 1). The organic layer was separated and washed with brine, dried over Na<sub>2</sub>SO<sub>4</sub>, and concentrated in reduced pressure. To a suspension of (methoxymethyl)triphenylphosphonium chloride (153 mg, 0.446 mmol) in THF (1.0 mL) was added sodium hexamethyldisilazide (1.9 M in THF, 0.200 mL, 0.380 mL) at 0 °C and the mixture was stirred for 40 min. To the resulting mixture was added a solution of the crude aldehyde derivative in THF (1.5 mL) at 0 °C, and the mixture was stirred at the same temperature for 4 h. After addition of sat. aq. NH<sub>4</sub>Cl, the solvent was concentrated in reduced pressure. The residue was partitioned between AcOEt and sat. aq. NH<sub>4</sub>Cl. The organic layer was separated and washed with brine, dried over Na<sub>2</sub>SO<sub>4</sub>, and concentrated in reduced pressure. The residue was purified by silica gel column chromatography (hexane : AcOEt = 15 : 1 = 10 : 1) to give **10** (65 mg, 0.161 mmol, 2 steps 83%, *E* : *Z* = 1 : 0.8) as a pale yellow oil.  $[\alpha]_D^{21}$  -30.0 (*c* 1.01, CHCl<sub>3</sub>); <sup>1</sup>H NMR (400 MHz, CDCl<sub>3</sub>) δ 8.11 (1H × 0.55, d, *J* = 8.8 Hz), 8.08 (1H × 0.45, d, *J* = 8.8 Hz), 7.75 (2H × 0.45, d, *J* = 8.2 Hz), 7.68 (2H × 0.55, d, *J* = 8.2 Hz), 7.33-7.31(1H, m), 7.21-7.17 (3H, m), 6.43 (1H × 0.55, d, *J* = 12.6 Hz), 6.11 (1H × 0.45, s), 6.09 (1H × 0.55, s), 6.04 (1H × 0.45, d, *J* = 6.3 Hz), 4.64 (1H × 0.55, dd, *J* = 12.6, 7.5 Hz), 4.15 (1H × 0.45, dd, *J* = 9.3, 6.3 Hz), 3.66 (3H × 0.45, s), 3.55 (3H × 0.55, s), 2.57-2.52 (1H × 0.45, m), 2.46-2.41 (1H × 0.55, m), 2.35 (3H × 0.55, s), 2.35 (3H × 0.45, s), 1.97-1.90 (1H × 0.45, m), 1.46-1.40 (1H × 0.55, m), 1.18-1.13 (1H × 0.45, m), 1.09-1.00 (2H × 0.55, 1H × 0.45, m); <sup>13</sup>C NMR (125 MHz, CDCl<sub>3</sub>) δ 148.05, 147.01, 144.90, 144.70, 144.68, 136.06, 135.79, 135.53, 135.32, 130.76, 130.59, 129.73, 129.08, 129.03, 126.79, 126.60, 123.89, 123.77, 119.62, 115.55, 115.53, 108.22, 105.03, 104.94, 104.06, 59.79, 56.03, 22.56, 21.58, 21.56, 20.09, 18.22, 17.69, 15.88, 15.37 ; LR-MS (ESI) *m/z* 401 [(M-H)<sup>+</sup>]; HR-MS (ESI) calcd for C<sub>21</sub>H<sub>19</sub>ClNO<sub>3</sub>S 400.0769, found 400.0782 [(M-H)<sup>+</sup>]; Anal. Calcd for C<sub>21</sub>H<sub>20</sub>ClNO<sub>3</sub>S + 0.1 H<sub>2</sub>O: C, 62.48; H, 5.03; N, 3.47; found: C, 62.20; H, 5.03; N, 3.32.

**(1R,2S)-2-[2-(4-Chlorobenzylamino)ethyl]-1-(5-Chloro-N-tosylindole-2-yl) cyclopropane (11)**

A solution of **10** (27 mg, 66.1 μmol) and aq. HCl (12 N, 0.11 mL) in THF (1.3 mL) was stirred at 0 °C for 15 min. After addition of sat. aq. NaHCO<sub>3</sub>, the solvent was concentrated in reduced pressure. The residue was partitioned between AcOEt and sat. aq. NH<sub>4</sub>Cl. The organic layer was separated and washed with brine, dried over Na<sub>2</sub>SO<sub>4</sub>, and concentrated in reduced pressure. To a mixture of the residue, 4-chlorobenzylamine (40 μL, 0.327 mmol) and MS4A (30 mg) in CH<sub>2</sub>Cl<sub>2</sub> (1.3 mL) was added Sodium triacetoxyborohydride (17 mg, 79.3 μmol) at rt and the mixture was stirred for 12 h. After

addition of sat. aq. NaHCO<sub>3</sub>, the reaction mixture was partitioned between AcOEt and sat. aq. NaHCO<sub>3</sub>. The organic layer was separated and washed with brine, dried over Na<sub>2</sub>SO<sub>4</sub>, and concentrated in reduced pressure. The residue was purified by silica gel column chromatography (hexane : AcOEt = 5 : 1 = 1 : 2) to give **11** (23 mg, 44.8 μmol, 2 steps 68%) as a pale yellow oil. [ $\alpha$ ]<sub>D</sub><sup>21</sup> -128.9 (*c* 1.04, CHCl<sub>3</sub>); <sup>1</sup>H NMR (400 MHz, CDCl<sub>3</sub>) δ 8.08 (1H, d, *J* = 8.8 Hz), 7.63 (2H, d, *J* = 8.4 Hz), 7.32 (1H, d, *J* = 2.0 Hz), 7.29-7.17 (7H, m), 6.08 (1H, s), 3.77 (2H, s), 2.74 (2H, t, *J* = 7.0 Hz), 2.34 (3H, s), 2.23-2.18 (1H, m), 1.89-1.81 (1H, m), 1.51-1.42 (1H, m), 1.14-1.06 (1H, m), 0.84-0.75 (2H, m); <sup>13</sup>C NMR (125 MHz, CDCl<sub>3</sub>) δ 145.19, 144.87, 138.71, 136.13, 135.52, 132.58, 130.61, 129.78, 129.43, 129.10, 128.48, 126.36, 123.90, 119.63, 115.53, 105.36, 53.18, 48.65, 33.93, 21.55, 20.80, 16.36, 15.49; LR-MS (FAB) *m/z* 513 [(M+H)<sup>+</sup>]; HR-MS (FAB) calcd for C<sub>27</sub>H<sub>27</sub>Cl<sub>2</sub>N<sub>2</sub>O<sub>2</sub>S 513.1170; found 513.1178 [(M+H)<sup>+</sup>]; Anal. Calcd for C<sub>27</sub>H<sub>26</sub>Cl<sub>2</sub>N<sub>2</sub>O<sub>2</sub>S + 0.4 H<sub>2</sub>O: C, 62.28; H, 5.19; N, 5.38; found: C, 62.03; H, 5.05; N, 5.22.

#### **(1*R*,2*S*)-2-[2-(4-Chlorobenzylamino)ethyl]-1-(5-Chloroindole-2-yl) cyclopropane (2b)**

A mixture of **11** (36 mg, 69.7 μmol) and potassium hydroxide (78 mg, 1.39 mmol) in EtOH (600 μL) was stirred at reflux for 3 h. After cooling sat. aq. NH<sub>4</sub>Cl and sat. aq. NaHCO<sub>3</sub> was added to the mixture, and EtOH was concentrated in reduced pressure. The residue was partitioned between AcOEt and sat. aq. NaHCO<sub>3</sub>. The organic layer was separated and washed with brine, dried over Na<sub>2</sub>SO<sub>4</sub>, and concentrated in reduced pressure. The residue was purified by silica gel column chromatography (CHCl<sub>3</sub> : MeOH = 1 : 0 – 98 : 2) to give **2b** (23 mg, 64.0 μmol, 92%, free amine) as a colorless oil. The free amine (17 mg, 47.3 μmol) was dissolved in 1 M HCl in EtOH (950 μL), and the solution was evaporated. The resulting residue was triturated with Et<sub>2</sub>O to give **2b** (19 mg, 47.3 μmol, hydrochloride) as a red hygroscopic amorphous solid. [ $\alpha$ ]<sub>D</sub><sup>21</sup> -78.0 (*c* 0.99, CH<sub>3</sub>OH, hydrochloride); <sup>1</sup>H NMR (500 MHz, CDCl<sub>3</sub>, 50 °C, hydrochloride) δ 9.33 (1H, brs), 7.46 (2H, d, *J* = 7.8 Hz), 7.39 (1H, d, *J* = 1.8 Hz), 7.26-7.22 (3H, m), 7.02 (1H, dd, *J* = 8.7, 1.8 Hz), 5.95 (1H, s), 4.00 (1H, d, *J* = 13.3 Hz), 3.96 (1H, d, *J* = 13.3 Hz), 2.91 (2H, brs), 1.89 (1H, brs), 1.72 (1H, brs), 1.61 (1H, brs), 1.18 (1H, brs), 0.92 (1H, brs), 0.66 (1H, brs); <sup>13</sup>C NMR (125 MHz, CDCl<sub>3</sub>, CD<sub>3</sub>OD, hydrochloride) δ 142.13, 135.70, 134.20, 131.33, 129.42, 129.24, 128.51, 124.53, 120.53, 118.45, 111.32, 96.19, 50.25, 46.42, 29.99, 19.02, 16.22, 13.93; LR-MS (ESI) *m/z* 359 [(M+H)<sup>+</sup>]; HR-MS (ESI) calcd for C<sub>20</sub>H<sub>21</sub>Cl<sub>2</sub>N<sub>2</sub> 359.1082, found 359.1085 [(M-HCl+H)<sup>+</sup>]; Anal. Calcd for C<sub>20</sub>H<sub>20</sub>Cl<sub>2</sub>N<sub>2</sub> + 0.1H<sub>2</sub>O (free amine): C, 66.52; H, 5.64; N, 7.76; found: C, 66.80; H, 5.94; N, 7.38.

#### **General procedure for the preparation of the quinoline derivatives (12).**

A mixture of the *N*-formyl derivative (**3D**) and Grubbs' 2nd cat. (10 mol%) in CH<sub>2</sub>Cl<sub>2</sub> (SM 0.05 M) was refluxed for 3 h. After cooling, the solvent was concentrated in reduced pressure. A solution of the

residue in EtOH and 4 N HCl aq. (SM 0.05 M, EtOH : 4 N HCl aq. = 1 : 1) was stirred at 80 °C for 7 h. After cooling and addition of sat. aq. NaHCO<sub>3</sub>, the reaction mixture was partitioned between AcOEt and sat. aq. NaHCO<sub>3</sub>. The organic layer was separated and washed with brine, dried over Na<sub>2</sub>SO<sub>4</sub>, and concentrated in reduced pressure. The residue was purified by silica gel column chromatography to give the quinoline derivative (**12**) as a brown oil.

**2-isopropylquinoline (12e)** [Cho, C. S.; Kim, B. T.; Choi, H. J.; Kimb, T. J.; Shimb, S. C., *Tetrahedron* **2003**, *59*, 7997–8002.]. **12e** (17 mg, 99.3 μmol, 3 steps 76%) was prepared from **6e** (26 mg, 0.131 mmol). <sup>1</sup>H NMR (400 MHz, CDCl<sub>3</sub>) δ 8.09 (1H, d, *J* = 8.6 Hz), 8.05 (1H, d, *J* = 8.0 Hz), 7.77 (1H, d, *J* = 8.0 Hz), 7.68 (1H, dd, *J* = 8.0, 6.9 Hz), 7.48 (1H, dd, *J* = 8.0, 6.9 Hz), 7.34 (1H, d, *J* = 8.6 Hz), 3.30-3.24 (1H, m), 1.40 (6H, d, *J* = 6.9 Hz); LR-MS (EI) *m/z* 171 [M<sup>+</sup>];

**2-isobutylquinoline (12f)**[Lewis, J. C.; Bergman, R. G.; Ellman, J. A., *J. Am. Chem. Soc.* **2007**, *129*, 5332-5333.]. **12f** (15 mg, 81.0 μmol, 3 steps 87%) was prepared from **6f** (20 mg, 92.7 μmol). <sup>1</sup>H NMR (400 MHz, CDCl<sub>3</sub>) δ 8.06 (2H, m), 7.78 (1H, d, *J* = 7.7 Hz), 7.68 (1H, dd, *J* = 7.7, 7.2 Hz), 7.48 (1H, dd, *J* = 7.7, 7.2 Hz), 7.27 (1H, d, *J* = 8.2 Hz), 2.85 (2H, d, *J* = 7.2 Hz), 2.27-2.18 (1H, m), 0.98 (6H, d, *J* = 6.3 Hz); LR-MS (ESI) *m/z* 186 [(M+H)<sup>+</sup>];

**2-Cyclopropylquinoline (12h)**[Molander, G. A.; Gormisky, P. E.; *J. Org. Chem.*, **2008**, *73*, 7481–7485.]. **12h** (12 mg, 71.5 μmol, 3 steps 77%) was prepared from **6h** (18 mg, 92.7 μmol). <sup>1</sup>H NMR (500 MHz, CDCl<sub>3</sub>) δ 7.99 (1H, d, *J* = 8.6 Hz), 7.96 (1H, d, *J* = 8.0 Hz), 7.73 (1H, d, *J* = 8.0 Hz), 7.64 (1H, dd, *J* = 8.0, 6.9 Hz), 7.42 (1H, dd, *J* = 8.0, 6.9 Hz), 7.16 (1H, d, *J* = 8.6 Hz), 2.27-2.22 (1H, m), 1.16-1.07 (4H, m); LR-MS (ESI) *m/z* 170 [(M+H)<sup>+</sup>];

**(1R,2R)-2-Hydroxymethyl-1-(quinol-2-yl)cyclopropane (12i)**. **12i** (15 mg, 77.3 μmol, 3 steps 67%) was prepared from **6i** (54 mg, 115 μmol). RCM (Step 1) was carried out with Grubbs' 2nd cat. (17 mg, 20 mol%) and benzene (1.0 mL) at 80 °C. [α]<sub>D</sub><sup>24</sup> -87.0 (*c* 0.20, CH<sub>3</sub>OH); <sup>1</sup>H NMR (400 MHz, CDCl<sub>3</sub>) δ 8.01 (1H, d, *J* = 8.6 Hz), 7.95 (1H, d, *J* = 8.6 Hz), 7.74 (1H, d, *J* = 7.7 Hz), 7.65 (1H, dd, *J* = 8.6, 7.2 Hz), 7.44 (1H, dd, *J* = 7.7, 7.2 Hz), 7.15 (1H, d, *J* = 8.6 Hz), 3.77 (1H, dd, *J* = 11.3, 5.9 Hz), 3.63 (1H, dd, *J* = 11.3, 7.2 Hz), 2.23-2.18 (1H, m), 2.11 (1H, brs), 1.94-1.86 (1H, m), 1.43-1.38 (1H, m), 1.10-1.06 (1H, m); <sup>13</sup>C NMR (125 MHz, CDCl<sub>3</sub>) δ 161.97, 147.71, 136.12, 129.47, 128.43, 127.47, 126.71, 125.39, 119.27, 65.99, 26.33, 23.87, 14.53; LR-MS (EI) *m/z* 199 (M<sup>+</sup>); HR-MS (EI) calcd for C<sub>13</sub>H<sub>13</sub>NO 199.0997, found 199.0999 (M<sup>+</sup>);

**(1S,2R)-2-Hydroxymethyl-1-(quinol-2-yl)cyclopropane (12j)**. **12j** (22 mg, 0.111 mmol, 3 steps 67%) was prepared from **6j** (77 mg, 0.165 mmol). RCM (Step 1) was carried out with Grubbs' 2nd cat. (24 mg, 20 mol%) and benzene (2.8 mL) at 80 °C. [α]<sub>D</sub><sup>22</sup> 82.0 (*c* 0.10, CH<sub>3</sub>OH); <sup>1</sup>H NMR (400 MHz, CDCl<sub>3</sub>) δ 8.09 (1H, d, *J* = 8.6 Hz), 7.93 (1H, d, *J* = 8.6 Hz), 7.78 (1H, d, *J* = 7.7 Hz), 7.68 (1H, dd, *J* = 8.6, 7.2 Hz), 7.51-7.47 (2H, m), 5.68 (1H, brs), 4.06 (1H, dd, *J* = 12.2, 3.2 Hz), 3.545 (1H, dd, *J* = 12.2, 8.6 Hz), 2.40-2.34 (1H, m), 1.76-1.72 (1H, m), 1.32-1.27 (1H, m), 1.23-1.29 (1H, m); <sup>13</sup>C NMR

(125 MHz, CDCl<sub>3</sub>)  $\delta$  161.35, 146.69, 136.48, 129.73, 128.12, 127.42, 126.58, 125.97, 123.45, 61.14, 23.43, 23.33, 11.64; LR-MS (ESI)  $m/z$  222 [(M+Na)<sup>+</sup>]; HR-MS (ESI) calcd for C<sub>13</sub>H<sub>13</sub>NNaO 222.0895, found 222.0889 [(M+Na)<sup>+</sup>]; Anal. Calcd for C<sub>13</sub>H<sub>13</sub>NO + 0.2 H<sub>2</sub>O: C, 76.97; H, 6.66; N, 6.90; found: C, 76.57; H, 6.75; N, 6.63;

**1-isopropylprop-2-en-1-yl 2-vinylphenyl ether (13a).** To a mixture of 4-Methyl-1-penten-3-ol [Hodgson, D. M., Fleming, M. J., Stanway, S. J., *J. Org. Chem.* **2007**, *72*, 4763-4773](100 mg, 0.998 mmol), 2-vinylphenol[Elias, X., Pleixats R., Man, M. W. C., *Tetrahedron*, **2008**, *64*, 6770-6781] (240 mg, 2.00 mmol) and tributylphosphine (375  $\mu$ L, 1.50 mmol) in THF (10 mL) was added 1,1'-(azocarbonyl)dipiperidine (378 mg, 1.50 mmol) at 0 °C. The resulting mixture was heated to rt, and stirred for 14 h. The solvent was concentrated in reduced pressure. The residue was purified by flash silica gel column chromatography (hexane) to give **13a** (90.8 mg, 0.449 mmol, 45%, volatile) as a colorless oil. <sup>1</sup>H NMR (500 MHz, CDCl<sub>3</sub>)  $\delta$  7.48 (1H, dd,  $J$  = 8.0, 1.7 Hz), 7.17-7.11 (2H, m), 6.90-6.87 (1H, m), 6.84 (1H, d,  $J$  = 8.6 Hz), 5.83 (1H, ddd,  $J$  = 17.2, 10.9, 6.3 Hz), 5.73 (1H, dd,  $J$  = 17.2, 1.7 Hz), 5.26-5.20 (3H, m), 4.41 (1H, dd,  $J$  = 6.3, 5.7 Hz), 2.06-1.98 (1H, m), 1.04 (3H, d,  $J$  = 6.9 Hz), 1.01 (3H, d,  $J$  = 6.9 Hz); <sup>13</sup>C NMR (100 MHz, CDCl<sub>3</sub>)  $\delta$  155.53, 136.09, 131.76, 128.48, 127.29, 126.18, 120.39, 117.48, 113.98, 113.86, 83.95, 32.97, 18.32, 18.02; LR-MS (EI)  $m/z$  202 (M<sup>+</sup>); HR-MS (EI) calcd for C<sub>14</sub>H<sub>18</sub>O 202.1358, found 202.1358 (M<sup>+</sup>)

#### Preparation of (1*R*,2*R*)-2--*t*-Butyldiphenylsilyloxymethyl-1-[1-(2-vinyl

#### phenoxy)prop-2-en-1-yl]cyclopropane (13b)

**(1*R*,2*R*)-2-*t*-Butyldiphenylsilyloxymethyl-1-[1-hydroxyprop-2-en-1-yl]cyclopropane.** To a solution of (1*R*, 2*R*)-2-(*tert*-butyldiphenylsilyloxy)methyl-1-formyl cyclopropane [Kazuta, Y. Matsuda, A. Shuto, S., *J. Org. Chem.* **2002**, *67*, 1669-1677.] (600 mg, 1.77 mmol) in THF (16 mL) was added vinyl magnesium chloride (1.46 M in THF, 1.45 mL, 2.12 mmol) at 0 °C and the mixture was stirred for 2 h. After addition of sat. aq. NH<sub>4</sub>Cl, the solvent concentrated in reduced pressure. The residue was partitioned between AcOEt and sat. aq. NH<sub>4</sub>Cl. The organic layer was separated and washed with brine, dried over Na<sub>2</sub>SO<sub>4</sub>, and concentrated in reduced pressure. The residue was purified by silica gel column chromatography (hexane : AcOEt = 10 : 1) to give diastereomixture of allyl alcohol (548 mg, 1.49 mmol, 84%, dr = 1 : 1) as a colorless oil.  $[\alpha]_D^{23}$  - 13.6 ( $c$  1.00, CHCl<sub>3</sub>); <sup>1</sup>H NMR (500 MHz, CDCl<sub>3</sub>, 1 : 1 diastereomixture)  $\delta$  7.68-7.65 (4H, m), 7.41-7.34 (6H, m), 5.96-5.85 (1H, m), 5.30-5.21 (1H, m), 5.09-5.06 (1H, m), 3.71-3.66 (1H, m), 3.56-3.51 (1H, m), 3.47-3.43 (1H, m), 2.00 (1H, s), 1.13-0.98 (10H, m), 0.92-0.84 (1H, m), 0.54-0.51 (1H x 0.5, m), 0.47-0.40 (1H + 1H x 0.5, m); <sup>13</sup>C NMR (125 MHz, CDCl<sub>3</sub>)

$\delta$  139.56, 139.31, 135.51, 133.69, 129.56, 129.52, 127.58, 127.53, 114.57, 114.48, 75.86, 75.63, 66.44, 66.20, 26.82, 26.77, 23.00, 22.74, 19.11, 19.01, 18.09, 7.93, 6.92; LR-MS (ESI)  $m/z$  389 [(M+Na)<sup>+</sup>]; HR-MS (ESI) calcd for C<sub>23</sub>H<sub>30</sub>NaO<sub>2</sub>Si 389.1913, found 389.1907 [(M+Na)<sup>+</sup>]; Anal. Calcd for C<sub>23</sub>H<sub>30</sub>O<sub>2</sub>Si: C, 75.36; H, 8.25; found: C, 75.21; H, 8.27;

**(1*R*,2*R*)-2-*t*-Butyldiphenylsilyloxymethyl-1-[1-(2-vinylphenoxy)prop-2-en-1-yl]cyclopropane**

**(13b)**

**and**

**(1*S*,2*R*)-2-*t*-Butyldiphenylsilyloxymethyl-1-[3-(2-vinylphenoxy)prop-1-en-1-yl]cyclopropane**

**(13b')**.

To

the

mixture

of

(1*R*,2*R*)-2-*t*-Butyldiphenylsilyloxymethyl-1-[1-hydroxyprop-2-en-1-yl]cyclopropane (247 mg, 0.674 mmol), 2-vinylphenol (162 mg, 1.35 mmol) and tributylphosphine (252  $\mu$ L, 1.01 mmol) in THF (6.7 mL) was added 1,1'-(azocarbonyl)dipiperidine (255 mg, 1.01 mmol) at 0 °C. The resulting mixture was warmed to rt, and stirred for 15 h. The solvent was concentrated in reduced pressure. The residue was purified by flash silica gel column chromatography (hexane) to give a mixture of **13b** and **13b'** (236 mg, 0.503 mmol, 75%, **13b** : **13b'** = 2 : 1, **13b**; dr = 1 : 1) as a colorless oil. [ $\alpha$ ]<sub>D</sub><sup>21</sup> -21.4 (*c* 1.01, CHCl<sub>3</sub>, mixture); <sup>1</sup>H NMR (500 MHz, CDCl<sub>3</sub>, **13b** : **13b'** = 2 : 1, **13b**; dr = 1 : 1 diastereomixture(**13ba**, **13bb**))  $\delta$  7.68-6.82 (45H, m), 5.97-5.85 (2H, m), 5.77-5.69 (4H, m), 5.42-5.36 (1H, m), 5.30-5.16 (7H, m), 4.47 (2H, d, *J* = 4.5 Hz), 4.28-4.25 (1H, m), 4.21-4.18 (1H, m), 3.70-3.47 (6H, m), 1.34-1.30 (1H, m), 1.17-1.04 (32H, m), 0.70-0.65 (1H, m), 0.62-0.48 (5H, m); <sup>13</sup>C NMR (100 MHz, CDCl<sub>3</sub>, **13b**, **13b'** mixture)  $\delta$  155.86, 155.42, 155.38, 137.58, 137.01, 136.95, 135.57, 133.84, 133.81, 133.78, 131.76, 131.70, 129.57, 129.54, 128.69, 128.45, 128.43, 127.78, 127.76, 127.59, 126.93, 126.39, 126.23, 126.19, 122.63, 120.94, 120.63, 116.41, 116.36, 115.12, 115.10, 114.22, 114.03, 112.3, 82.10, 81.70, 69.04, 66.29, 66.11, 66.05, 26.84, 22.72, 21.10, 20.69, 19.19, 19.02, 18.81, 17.95, 11.4, 8.02, 6.65; LR-MS (ESI)  $m/z$  491 [(M+Na)<sup>+</sup>]; HR-MS (ESI) calcd for C<sub>31</sub>H<sub>36</sub>NaO<sub>2</sub>Si 491.2382, found 491.2384 [(M+Na)<sup>+</sup>]; Anal. Calcd for C<sub>31</sub>H<sub>36</sub>O<sub>2</sub>Si: C, 79.44; H, 7.74; found: C, 79.15;

H, 7.86.

**Preparation of (1*S*,2*R*)-2-Benzyloxymethyl-1-[1-(2-vinylphenoxy)prop-2-en-1-yl]cyclopropane (13c)**

**(1*S*,2*R*)- 1,1-dimethoxymethyl-2-Hydroxymethylcyclopropane.** A mixture of (1*S*, 2*R*)-2-(*tert*-butyldiphenylsilyloxy)methyl-1-formyl cyclopropane [Kazuta, Y. Matsuda, A. Shuto, S., *J. Org. Chem.* **2002**, *67*, 1669-1677.] (800 mg, 2.36 mmol) and PPTS (59 mg, 0.236 mmol) in MeOH (24 mL) was stirred at 55 °C for 4 h. After cooling and addition of sat. aq. NaHCO<sub>3</sub>, the reaction mixture was partitioned between AcOEt and sat. aq. NaHCO<sub>3</sub>. The organic layer was separated and washed with brine, dried over Na<sub>2</sub>SO<sub>4</sub>, and concentrated in reduced pressure. To a solution of the residue in THF (24 mL) was added TBAF (1.0 M in THF, 2.40 mL, 2.40 mmol) at rt, and stirred for 2 h. The solvent was concentrated in reduced pressure. The residue was purified by silica gel column chromatography (hexane : AcOEt = 5 : 1 – 1 : 2) to give alcohol (322 mg, 2.20 mmol, 2 steps 93%, volatile) as a colorless oil. [ $\alpha$ ]<sub>D</sub><sup>21</sup> 34.3 (*c* 1.02, CHCl<sub>3</sub>); <sup>1</sup>H NMR (500 MHz, CDCl<sub>3</sub>)  $\delta$  4.21 (1H, d, *J* = 7.4 Hz), 3.93-3.90 (1H, m), 3.40 (3H, s), 3.39 (3H, s), 3.23 (1H, dd, *J* = 12.0, 9.7 Hz), 2.91 (1H, brs), 1.37-1.29 (2H, m), 0.92-0.87 (1H, m), 0.48-0.45 (1H, m); <sup>13</sup>C NMR (125 MHz, CDCl<sub>3</sub>)  $\delta$  104.56, 63.22, 53.53, 51.76, 17.15, 17.13, 8.02; LR-MS (ESI) *m/z* 169 [(M+Na)<sup>+</sup>]; HR-MS (ESI) calcd for C<sub>13</sub>H<sub>13</sub>NO 169.0841, found 169.0835 [(M+Na)<sup>+</sup>];

**(1*S*,2*R*)-2-Benzyloxymethyl-1,1-dimethoxymethylcyclopropane.** To a solution of (1*S*,2*R*)-1,1-dimethoxymethyl-2-Hydroxymethylcyclopropane (322 mg, 2.20 mmol) in THF and DMF (15 mL, THF : DMF = 1 : 1) was added NaH (60% in mineral oil, 176 mg, 4.40 mmol) at 0 °C, and the mixture was stirred for 30 min. After addition of benzylbromide (0.780 mL, 6.60 mmol), the resulting mixture was heated to rt and stirred for 23 h. After addition of sat. aq. NH<sub>4</sub>Cl, the reaction mixture was partitioned between AcOEt and sat. aq. NH<sub>4</sub>Cl. The organic layer was separated and washed with sat. aq. NaHCO<sub>3</sub>, brine, dried over Na<sub>2</sub>SO<sub>4</sub>, and concentrated in reduced pressure. The residue was purified by silica gel column chromatography (hexane : AcOEt = 20 : 1 – 10 : 1) to give benzylether (487 mg, 2.06 mmol, 94%) as a colorless oil. [ $\alpha$ ]<sub>D</sub><sup>20</sup> 13.6 (*c* 0.99, CHCl<sub>3</sub>); <sup>1</sup>H NMR (500 MHz, CDCl<sub>3</sub>)  $\delta$  7.38-7.26 (5H, m), 4.56 (1H, d, *J* = 12.0 Hz), 4.51 (1H, d, *J* = 12.0 Hz), 4.17 (1H, d, *J* = 5.7 Hz), 3.58 (1H, dd, *J* = 10.9, 6.9 Hz), 3.46 (1H, dd, *J* = 10.9, 7.4 Hz), 3.33 (3H, s), 3.32 (3H, s), 1.32-1.22 (2H, m), 0.91-0.86 (1H, m), 0.51-0.48 (1H, m); <sup>13</sup>C NMR (125 MHz, CDCl<sub>3</sub>)  $\delta$  138.40, 128.30, 127.67, 127.48, 103.47, 72.68, 69.87, 51.99, 17.47, 17.68, 7.63; LR-MS (ESI) *m/z* 259 [(M+Na)<sup>+</sup>]; HR-MS (ESI) calcd for C<sub>14</sub>H<sub>20</sub>NaO<sub>3</sub> 259.1310, found 259.1309 [(M+Na)<sup>+</sup>]; Anal. Calcd for C<sub>14</sub>H<sub>20</sub>O<sub>3</sub>: C, 71.16; H, 8.53; found: C, 71.02; H, 8.42;

**(1*S*,2*R*)-2-Benzyloxymethyl-1-[1-hydroxyprop-2-en-1-yl]cyclopropane.** To a solution of

(1*S*,2*R*)-2-Benzyloxymethyl-1,1-dimethoxymethylcyclopropane (313 mg, 1.32 mmol) in Hexane (2.6 mL) was added formic acid (10.5 mL), and stirred at rt for 1 h. After cooling to 0 °C, 2 M NaOH aq. was added, and resulting mixture was partitioned between CH<sub>2</sub>Cl<sub>2</sub> and 2 M NaOH aq. . The organic layer was separated and washed with sat. aq. NH<sub>4</sub>Cl, sat. aq. NaHCO<sub>3</sub>, brine, dried over Na<sub>2</sub>SO<sub>4</sub>, and concentrated in reduced pressure. To a solution of the residue in THF (13 mL) was added vinyl magnesium chloride (1.46 M in THF, 1.81 mL, 2.64 mmol) at -78 °C and stirred for 1 h. After addition of sat. aq. NH<sub>4</sub>Cl, the solvent concentrated in reduced pressure. The residue was partitioned between AcOEt and sat. aq. NH<sub>4</sub>Cl. The organic layer was separated and washed with brine, dried over Na<sub>2</sub>SO<sub>4</sub>, and concentrated in reduced pressure. The residue was purified by Flash silica gel column chromatography (hexane : AcOEt = 30 : 1 – 4 : 1) to give allyl alcohol **A** (127 mg, 0.582 mmol, 2 steps 44%, major diastereomer) as a colorless oil, and allyl alcohol **B** (87 mg, 2 steps 0.399 mmol, 30%, minor diastereomer) as a colorless oil.

major diastereomer, **A**:

: [ $\alpha$ ]<sub>D</sub><sup>20</sup> -23.3 (*c* 1.02, CHCl<sub>3</sub>); <sup>1</sup>H NMR (400 MHz, CDCl<sub>3</sub>)  $\delta$  7.37-7.26 (5H, m, aromatic), 6.02 (1H, ddd, *J* = 17.2, 10.4, 5.4 Hz, OCHCH=CH<sub>2</sub>), 5.27 (1H, d, *J* = 17.2 Hz, OCHCH=CHaHb), 5.11 (1H, d, *J* = 10.4 Hz, OCHCH=CHaHb), 4.52 (1H, d, *J* = 11.8 Hz, benzyl-Ha), 4.48 (1H, d, *J* = 11.8 Hz, benzyl-Hb), 3.94 (1H, brs, OCHCH=CH<sub>2</sub>), 3.64 (1H, dd, *J* = 10.4, 6.8 Hz, CHaHbOBn), 3.41 (1H, dd, *J* = 10.4, 8.6 Hz, CHaHbOBn), 2.11 (1H, brs, OH), 1.37-1.27 (1H, m, H-1), 1.21-1.12 (1H, m, H-2), 0.90-0.84 (1H, m, H-3a), 0.48-0.43 (1H, m, H-3b); <sup>13</sup>C NMR (125 MHz, CDCl<sub>3</sub>)  $\delta$  140.52, 137.96, 128.35, 127.78, 127.64, 113.84, 72.69, 72.23, 70.18, 22.23, 15.81, 8.38; LR-MS (ESI) *m/z* 241 [(M+Na)<sup>+</sup>]; HR-MS (ESI) calcd for C<sub>14</sub>H<sub>18</sub>NaO 241.1205, found 241.1204 [(M+Na)<sup>+</sup>]; Anal. Calcd for C<sub>14</sub>H<sub>18</sub>O<sub>2</sub> + 0.1 H<sub>2</sub>O: C, 76.40; H, 8.33; found: C, 76.36; H, 8.34;

minor diastereomer, **B**:

: [ $\alpha$ ]<sub>D</sub><sup>21</sup> 98.5 (*c* 1.02, CHCl<sub>3</sub>); <sup>1</sup>H NMR (400 MHz, CDCl<sub>3</sub>)  $\delta$  7.36-7.26 (5H, m), 6.01 (1H, ddd, *J* = 17.2, 10.4, 6.0 Hz), 5.32 (1H, dd, *J* = 17.2, 1.4 Hz), 5.13 (1H, dd, *J* = 10.4, 1.4 Hz), 4.58 (1H, d, *J* = 11.8 Hz), 4.54 (1H, d, *J* = 11.8 Hz), 3.99 (1H, dd, *J* = 10.4, 5.4 Hz), 3.84 (1H, brs), 3.68 (1H, dd, *J* = 10.4, 5.4 Hz), 3.21 (1H, dd, *J* = 10.9, 10.4 Hz), 1.41-1.31 (1H, m), 1.23-1.15 (1H, m), 0.89-0.83 (1H, m), 0.32-0.28 (1H, m); <sup>13</sup>C NMR (125 MHz, CDCl<sub>3</sub>)  $\delta$  139.22, 137.23, 128.44, 127.81, 114.11, 73.26, 73.07, 71.08, 23.04, 14.98, 8.77; LR-MS (ESI) *m/z* 241 [(M+Na)<sup>+</sup>]; HR-MS (ESI) calcd for C<sub>14</sub>H<sub>18</sub>NaO 241.1205, found 241.1205 [(M+Na)<sup>+</sup>]; Anal. Calcd for C<sub>14</sub>H<sub>18</sub>O<sub>2</sub> + 0.1 H<sub>2</sub>O: C, 76.40; H, 8.33; found: C, 76.59; H, 8.37;

**(1*S*,2*R*)-2-Benzyloxymethyl-1-[1-(2-vinylphenoxy)prop-2-en-1-yl]cyclopropane (13c)**. To a mixture of (1*S*,2*R*)-2-Benzyloxymethyl-1-[1-hydroxyprop-2-en-1-yl]cyclopropane (diastereomer **A**, 200 mg, 0.916 mmol), 2-vinylphenol (170 mg, 1.41 mmol), trimethylphosphine (1.0 M in THF, 1.20 mL, 1.20 mmol) was added 1, 1'-azobis(*N,N*-dimethylformamide) (210 mg, 1.22 mmol) at 0 °C and

the mixture was stirred for 30 min. After addition of sat. aq.  $\text{NH}_4\text{Cl}$ , the solvent concentrated in reduced pressure. The residue was partitioned between  $\text{CH}_2\text{Cl}_2$  and 2 M  $\text{NaOH}$  aq. . The organic layer was separated and washed with sat. aq.  $\text{NH}_4\text{Cl}$ , brine, dried over  $\text{Na}_2\text{SO}_4$ , and concentrated in reduced pressure. The residue was purified by Flash silica gel column chromatography (hexane :  $\text{AcOEt}$  = 1 : 0 – 49 : 1) to give a diastereomixture of **13c** (90 mg, 0.279 mmol, 30%, 2 steps, dr = 1 : 0.3) as a yellow oil.  $[\alpha]_{\text{D}}^{21}$  25.0 (*c* 1.02,  $\text{CHCl}_3$ , diastereomixture);  $^1\text{H}$  NMR (500 MHz,  $\text{CDCl}_3$ , 3:1 diastereomer mixture)  $\delta$  7.47-7.07 (8H, m), 6.98-6.85 (1H, m), 6.77-6.69 (1H, m), 6.08 (1H x 0.75, ddd,  $J$  = 17.2, 10.9, 5.2 Hz), 5.98 (1H x 0.25, ddd,  $J$  = 17.2, 10.9, 5.7 Hz), 5.74 (1H x 0.75, d,  $J$  = 17.8 Hz), 5.73 (1H x 0.25, d,  $J$  = 17.8 Hz), 5.31-5.15 (2H, m), 4.52 (1H x 0.75, d,  $J$  = 12.0 Hz), 4.43 (1H x 0.75, d,  $J$  = 12.0 Hz), 4.38 (1H x 0.25, d,  $J$  = 11.5 Hz), 4.33 (1H x 0.25, d,  $J$  = 11.5 Hz), 4.28 (1H x 0.75, m), 4.20 (1H x 0.25, m), 3.63 (1H x 0.75, dd,  $J$  = 10.4, 6.3 Hz), 3.58 (1H x 0.25, dd,  $J$  = 10.3, 5.7 Hz), 3.43 (1H x 0.75, dd,  $J$  = 10.4, 8.0 Hz), 3.29 (1H x 0.25, dd,  $J$  = 10.3, 6.9 Hz), 1.39-1.26 (2H, m), 0.94-0.87 (1H, m), 0.48-0.45 (1H x 0.75, m), 0.41-0.38 (1H x 0.25, m);  $^{13}\text{C}$  NMR (100 MHz,  $\text{CD}_3\text{OD}$ )  $\delta$  156.74, 156.61, 139.53, 139.46, 139.41, 139.10, 133.32, 133.24, 129.67, 129.64, 129.39, 129.24, 129.12, 128.93, 128.90, 128.75, 128.52, 127.24, 127.19, 122.00, 121.85, 116.38, 116.29, 115.85, 115.75, 114.15, 81.21, 80.87, 73.76, 73.71, 71.05, 70.82, 22.27, 22.07, 17.43, 16.50, 8.97, 8.48; LR-MS (ESI)  $m/z$  343  $[(\text{M}+\text{Na})^+]$ ; HR-MS (ESI) calcd for  $\text{C}_{22}\text{H}_{24}\text{NaO}_2$  343.1674, found 343.1671  $[(\text{M}+\text{Na})^+]$ ; Anal. Calcd for  $\text{C}_{22}\text{H}_{24}\text{O}_2 + 0.1 \text{H}_2\text{O}$ : C, 82.00; H, 7.71; found: C, 81.93; H, 7.71;

#### Preparation of the chromene derivatives (14).

##### 2-Isopropyl-2*H*-Chromene (14a)

To a solution of **13a** (30 mg, 0.148 mmol) in toluene (1.5 mL) was added Grubbs' 2nd cat. (25 mg, 20 mol%) at rt, then refluxed for 2 h. After cooling, the solvent was concentrated in reduced pressure. The residue was purified by silica gel column chromatography (hexane) to give **14a** (19 mg, 0.111  $\mu\text{mol}$ , 75%, volatile) as a pale yellow oil.  $^1\text{H}$  NMR (400 MHz,  $\text{CDCl}_3$ )  $\delta$  7.10-7.06 (1H, m), 6.95-6.92 (1H, m), 6.83-6.79 (1H, m), 6.77-6.75 (1H, m), 6.42 (1H, dd,  $J$  = 10.0, 1.4 Hz), 5.69 (1H, dd,  $J$  = 10.0, 3.2 Hz), 4.63-4.61 (1H, m), 2.04-1.96 (1H, m), 1.01 (3H, d,  $J$  = 6.8 Hz), 1.00 (3H, d,  $J$  = 6.8 Hz);  $^{13}\text{C}$  NMR (100 MHz,  $\text{CDCl}_3$ )  $\delta$  153.99, 129.03, 126.35, 124.40, 124.23, 121.95, 120.66, 115.60, 79.94, 33.42, 17.76, 17.69; LR-MS (EI)  $m/z$  174 ( $\text{M}^+$ ); HR-MS (EI) calcd for  $\text{C}_{12}\text{H}_{14}\text{O}$  174.1045, found 174.1039 ( $\text{M}^+$ )

**(1*R*,2*R*)-2-*t*-Butyldiphenylsilyloxymethyl-1-(2*H*-chromen-2-yl)cyclopropane (14b)**. To a solution of a mixture of **13b** and **13b'** (37 mg, 79.8  $\mu\text{mol}$ , **13b** : **13b'** = 2 : 1, **13b**; dr = 1 : 1) in toluene (0.80 mL) was added Grubbs' 2nd cat. (14 mg, 20 mol%) at rt, then refluxed for 4 h. After cooling, the solvent was concentrated in reduced pressure. The residue was purified by silica gel column chromatography (hexane) to give **14b** (23 mg, 53.2  $\mu\text{mol}$ , quant., dr = 1 : 1).  $[\alpha]_{\text{D}}^{22}$  -27.8 (*c* 0.78,



CHCl<sub>3</sub>, 1:1 diastereomixture); <sup>1</sup>H NMR (400 MHz, CDCl<sub>3</sub>, 1:1 diastereomixture) δ 7.67-7.64 (4H, m), 7.42-7.31 (6H, m), 7.11-7.05 (1H, m), 6.98-6.94 (1H, m), 6.86-6.75 (2H, m), 6.41-6.38 (1H, m), 5.76 (1H x 0.5, dd, *J* = 10.0, 3.6 Hz), 5.67 (1H x 0.5, dd, *J* = 10.0, 3.6 Hz), 4.36-4.32 (1H x 0.5, m), 4.26-4.23 (1H x 0.5, m), 3.70 (1H x 0.5, *J* = 10.9, 5.4 Hz), 3.62 (1H x 0.5, *J* = 10.9, 5.9 Hz), 3.52 (1H x 0.5, *J* = 10.9, 6.3 Hz), 3.39 (1H x 0.5, *J* = 10.9, 6.8 Hz), 1.20-1.00 (11H, m), 0.69-0.64 (1H x 0.5, m), 0.54-0.49 (2H x 0.5, m), 0.45-0.40 (1H x 0.5, m); <sup>13</sup>C NMR (125 MHz, CDCl<sub>3</sub>); 153.60, 153.58, 135.62, 135.58, 133.90, 133.87, 133.78, 133.74, 129.59, 129.52, 129.11, 129.10, 127.67, 127.61, 127.57, 126.40, 126.36, 124.93, 124.35, 124.03, 121.85, 121.72, 120.91, 120.77, 115.99, 115.90, 78.60, 77.99, 66.34, 66.32, 26.84, 21.46, 21.18, 19.22, 18.87, 17.69, 8.29, 6.20; LR-MS (ESI) *m/z* 440 (M<sup>+</sup>, 33), 439 [(M-H)<sup>+</sup>, 100]; HR-MS (ESI) calcd for C<sub>29</sub>H<sub>31</sub>O<sub>2</sub>Si 439.2089, found 439.2099 [(M-H)<sup>+</sup>]; Anal. Calcd for C<sub>29</sub>H<sub>32</sub>O<sub>2</sub>Si + 0.5 H<sub>2</sub>O: C, 77.46; H, 7.40; found: C, 77.41; H, 7.30;

**(1*R*,2*R*)-2-benzyloxymethyl-1-(2*H*-chromen-2-yl)cyclopropane (14c).** To a solution of **13c** (20 mg, 62.4 μmol, dr = 1 : 0.3) in toluene (1.5 mL) was added Grubbs 2nd cat. (25 mg, 20 mol%) at rt and the mixture was refluxed for 7 h. After cooling, the solvent was concentrated in reduced pressure. The residue was purified by silica gel column chromatography (hexane) to give **14c** (17 mg, 56.8 μmol, 91%, dr = 1 : 0.6) as a colorless oil.

major diastereomer

<sup>1</sup>H NMR (500 MHz, CDCl<sub>3</sub>) δ 7.39-7.28 (5H, m), 7.11-7.07 (1H, m), 6.97-6.96 (1H, m), 6.86-6.83 (1H, m), 6.80-6.79 (1H, m), 6.38 (1H, dd, *J* = 9.7, 1.1 Hz), 5.93 (1H, dd, *J* = 9.7, 3.4 Hz), 4.55 (1H, d, *J* = 12.0 Hz), 4.48 (1H, d, *J* = 12.0 Hz), 4.47-4.40 (1H, m), 3.74 (1H, *J* = 10.3, 5.7 Hz), 3.30 (1H, *J* = 10.3, 8.6 Hz), 1.45-1.33 (2H, m), 0.94-0.90 (1H, m), 0.57-0.54 (1H, m); <sup>13</sup>C NMR (125 MHz, CDCl<sub>3</sub>); 153.50, 138.11, 128.99, 128.42, 127.78, 127.69, 126.38, 123.37, 121.98, 120.96, 116.01, 76.21, 72.93, 70.32, 20.62, 15.35, 8.79

minor diastereomer

<sup>1</sup>H NMR (500 MHz, CDCl<sub>3</sub>) δ 7.40-7.27 (5H, m), 7.11-7.08 (1H, m), 6.98-6.96 (1H, m), 6.86-6.83 (1H, m), 6.80-6.78 (1H, m), 6.42 (1H, dd, *J* = 9.7, 1.1 Hz), 5.78 (1H, dd, *J* = 9.7, 2.9 Hz), 4.60 (2H, s), 4.41-4.38 (1H, m), 3.85 (1H, *J* = 10.3, 5.7 Hz), 3.50 (1H, *J* = 10.3, 7.4 Hz), 1.49-1.42 (1H, m), 1.40-1.33 (1H, m), 0.94-0.88 (1H, m), 0.37-0.34 (1H, m); <sup>13</sup>C NMR (125 MHz, CDCl<sub>3</sub>); 153.50, 138.55, 129.10, 128.36, 127.69, 127.51, 126.43, 125.40, 124.19, 121.83, 120.97, 116.03, 75.89, 72.76, 69.73, 20.41, 15.06, 7.62

: [α]<sub>D</sub><sup>21</sup> -42.1 (*c* 1.26, CHCl<sub>3</sub>, 1 : 0.6 diastereomixture); LR-MS (ESI) *m/z* 292 (M<sup>+</sup>, 22), 291 [(M-H)<sup>+</sup>, 100]; HR-MS (ESI) calcd for C<sub>20</sub>H<sub>19</sub>O<sub>2</sub> 291.1380, found 291.1392 [(M-H)<sup>+</sup>];

### Preparation of the benzofuran derivatives (15).

**2-isopropylbenzofurane (15a)**[David, M.; Sauleau, J.; Sauleau, A., *Tetrahedron*, **1988**, *44*,

3587-3594.]. To a solution of **13a** (30 mg, 0.148 mmol) in xylene (1.5 mL) was added Ru(CO)HCl(PPh<sub>3</sub>)<sub>3</sub> (28 mg, 20 mol%) at rt and the mixture was refluxed for 13 h. After cooling, the solvent was concentrated in reduced pressure. To a solution of the residue in toluene (1.5 mL) was added Grubbs' 2nd cat. (25 mg, 20 mol%) and the mixture was heated to 80 °C for 2 h. The solvent was concentrated in reduced pressure. The residue was purified by silica gel column chromatography (hexane) to give **15a** (16 mg, 97.3 μmol, 2 steps 66%, volatile) as a colorless oil. <sup>1</sup>H NMR (500 MHz, CDCl<sub>3</sub>) δ 7.49-7.47 (1H, m), 7.41 (1H, d, *J* = 7.7 Hz), 7.22-7.15 (2H, m), 6.36 (1H, s), 3.11-3.04 (1H, m), 1.35 (6H, d, *J* = 6.8 Hz); LR-MS (EI) *m/z* 160 (M<sup>+</sup>)

**(1R,2R)-1-(benzofuran-2-yl)-2-*t*-Butyldiphenylsilyloxymethylcyclopropane (15b)**. To a solution of a mixture of **13b** and **13b'** (30 mg, 64.0 μmol, **13b** : **13b'** = 2 : 1, **13b**; dr = 1 : 1) in xylene (0.65 mL) was added Ru(CO)HCl(PPh<sub>3</sub>)<sub>3</sub> (12 mg, 20 mol%) at rt and the mixture was refluxed for 14 h. After cooling, to the mixture Grubbs' 2nd cat. (11 mg, 20 mol%) was added and heated to 80 °C for 2 h. After cooling, the solvent was concentrated in reduced pressure. The residue was purified by silica gel column chromatography (hexane) to give **15b** (18 mg, 42.7 μmol, 2 steps quant.) as a colorless oil. [α]<sub>D</sub><sup>23</sup> -86.1 (*c* 1.05, CHCl<sub>3</sub>); <sup>1</sup>H NMR (500 MHz, CDCl<sub>3</sub>) δ 7.69-7.68 (4H, m), 7.45-7.35 (8H, m), 7.19-7.14 (2H, m), 6.32 (1H, s), 3.79 (1H, dd, *J* = 10.3, 5.2 Hz), 3.69 (1H, dd, *J* = 10.3, 5.7 Hz), 1.95-1.92 (1H, m), 1.66-1.62 (1H, m), 1.13-1.10 (1H, m), 1.06 (9H, s), 0.98-0.94 (1H, m); <sup>13</sup>C NMR (125 MHz, CDCl<sub>3</sub>) δ 159.65, 154.19, 135.62, 135.60, 133.71, 133.65, 129.64, 129.12, 127.66, 122.83, 122.42, 119.85, 110.57, 100.36, 65.28, 26.84, 22.99, 19.26, 14.29, 11.54; LR-MS (ESI) *m/z* 449 [(M+Na)<sup>+</sup>]; HR-MS (ESI) calcd for C<sub>28</sub>H<sub>30</sub>NaO<sub>2</sub>Si 449.1913, found 449.1914 [(M+Na)<sup>+</sup>]; Anal. Calcd for C<sub>28</sub>H<sub>30</sub>OSi: C, 78.83; H, 7.09; found: C, 78.53; H, 7.28;

**(1S,2R)-1-(Benzofuran-2-yl)-2-benzyloxymethylcyclopropane (15c)**. To a solution of **13c** (20 mg, 62.4 μmol, dr = 1 : 0.3) in xylene (0.62 mL) was added Ru(CO)HCl(PPh<sub>3</sub>)<sub>3</sub> (12 mg, 20 mol%) at rt and the mixture was refluxed for 3 h. After cooling, to the mixture Grubbs' 2nd cat. (11 mg, 20 mol%) was added and the mixture was heated to 80 °C for 3 h. After cooling, the solvent was concentrated in reduced pressure. The residue was purified by silica gel column chromatography (hexane) to give **15c** (9 mg, 32.3 μmol, 2 steps 52%) as a colorless oil. [α]<sub>D</sub><sup>21</sup> -5.2 (*c* 0.70, CHCl<sub>3</sub>); <sup>1</sup>H NMR (500 MHz, CDCl<sub>3</sub>) δ 7.47-7.46 (1H, m), 7.41-7.39 (1H, m), 7.24-7.07 (7H, m), 6.38 (1H, s), 4.41 (1H, d, *J* = 12.0 Hz), 4.31 (1H, d, *J* = 12.0 Hz), 3.48 (1H, dd, *J* = 10.3, 6.3 Hz), 3.32 (1H, dd, *J* = 10.3, 8.6 Hz), 2.31-2.26 (1H, m), 1.66-1.62 (1H, m), 1.26-1.22 (1H, m), 0.98-0.95 (1H, m); <sup>13</sup>C NMR (100 MHz, CDCl<sub>3</sub>) δ 157.06, 154.65, 138.17, 128.79, 128.17, 127.48, 127.36, 123.22, 122.46, 120.17, 110.78, 103.32, 72.74, 69.63, 19.29, 14.09, 9.12; LR-MS (ESI) *m/z* 301 [(M+Na)<sup>+</sup>]; HR-MS (ESI) calcd for C<sub>19</sub>H<sub>18</sub>O<sub>2</sub>Na 301.1205, found 301.1199 [(M+Na)<sup>+</sup>]; Anal. Calcd for C<sub>19</sub>H<sub>18</sub>O<sub>2</sub> + 0.6 H<sub>2</sub>O: C, 78.92; H, 6.69; found: C, 78.83; H, 6.50;

07KT3-9I-1 (500, CD3Cl)

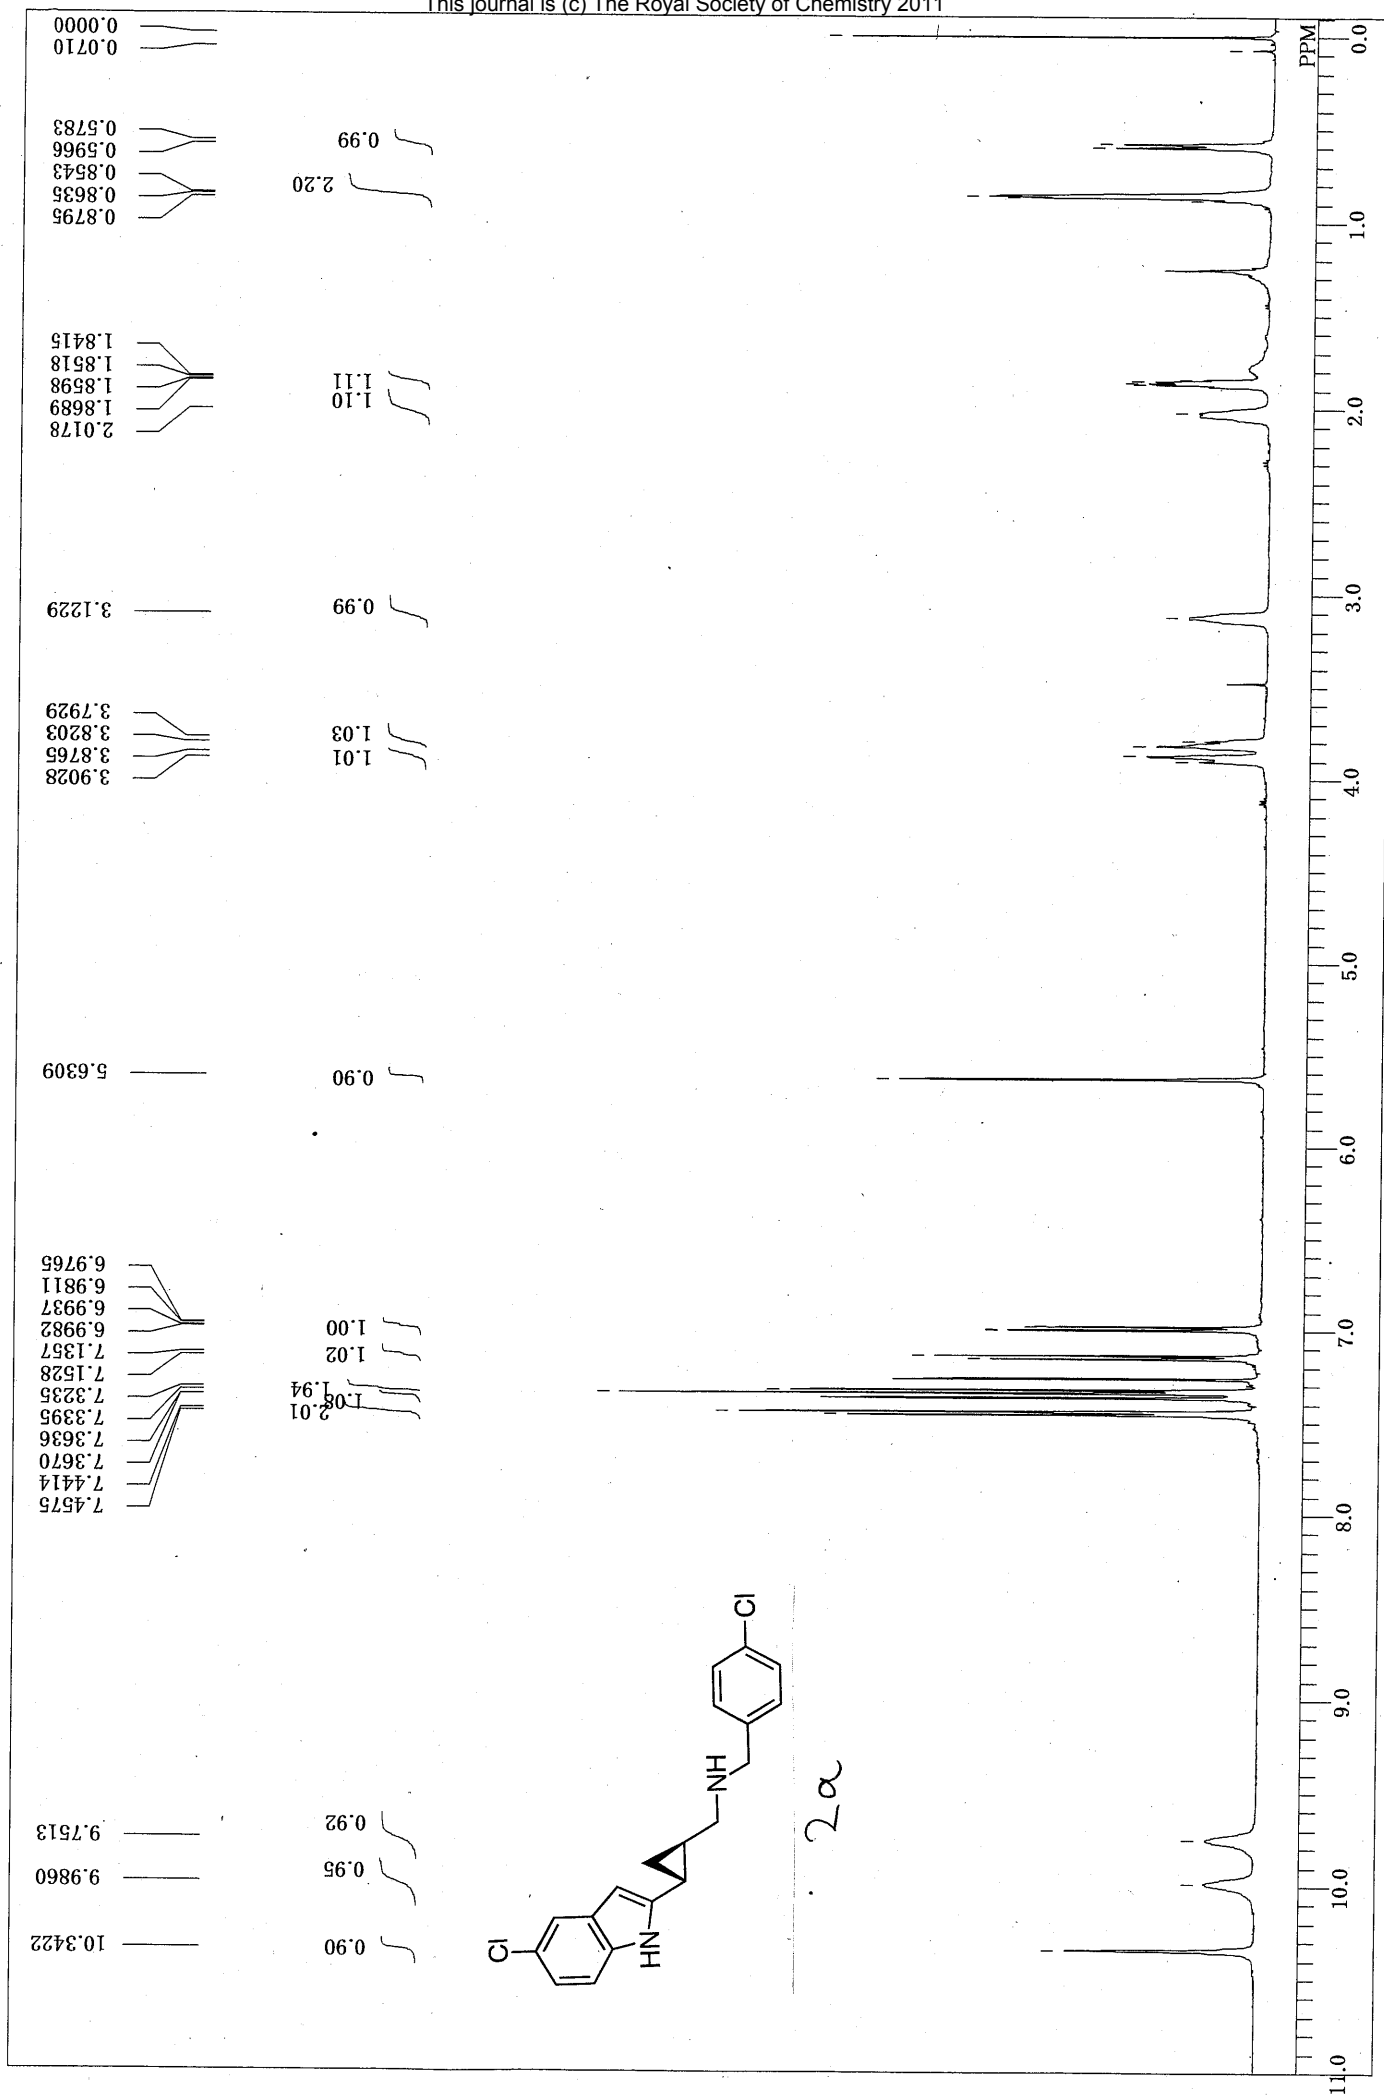

07KT3-91-1C (500, CDCl<sub>3</sub>)

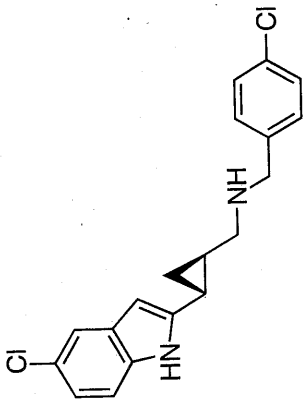

2a

10.3939  
16.7464  
17.5572

49.8158  
50.0447

97.4120

111.3475

119.3120  
121.2387  
124.8347  
127.7534  
129.1460  
129.4989  
131.6451  
134.3444  
136.0518  
139.4283

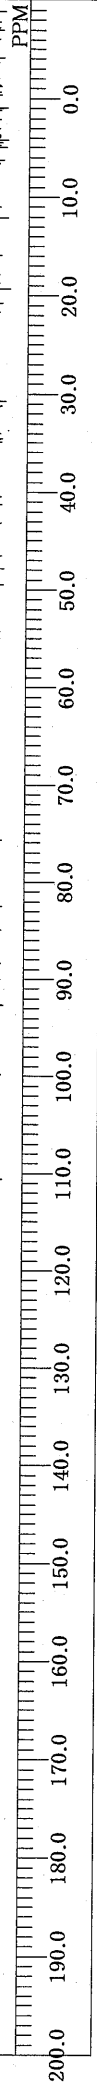

07KT4-6-1 CDCl3 (500, CDCl3, t50)

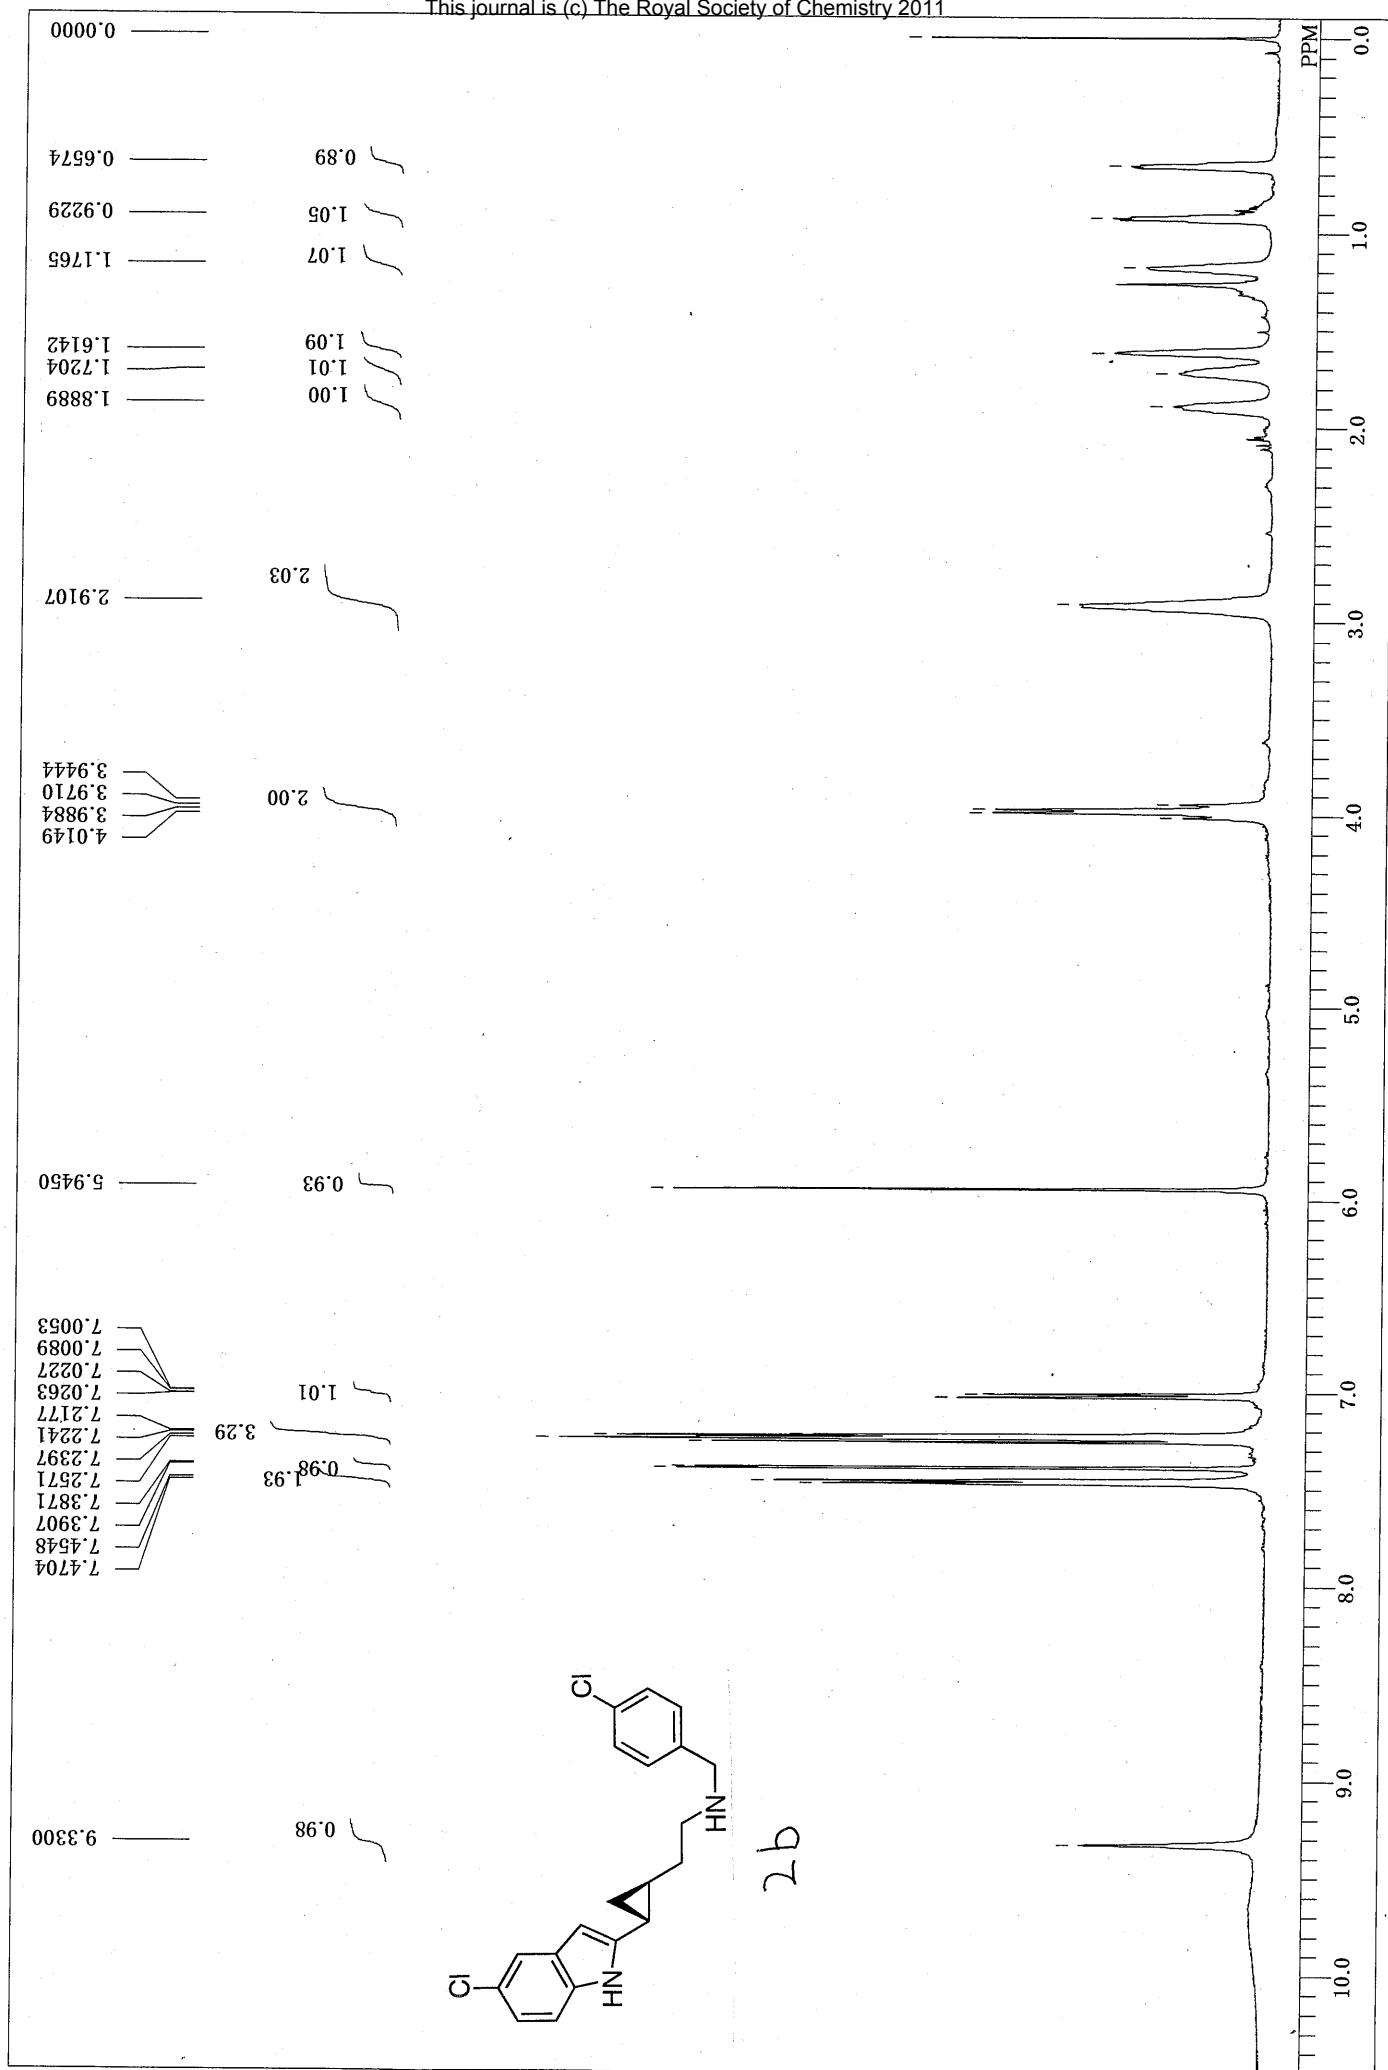

07KT4-6-1 C(500,CDCI3CD3OD)

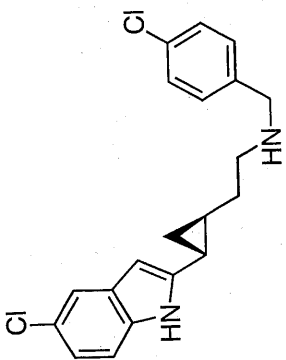

2b

13.9326  
16.2218  
19.0165  
29.9856  
46.4201  
50.2545

96.1911  
111.3189  
118.4536  
120.5329  
124.5295  
128.5069  
129.2414  
129.4226  
131.3303  
134.2013  
135.6988  
142.1277

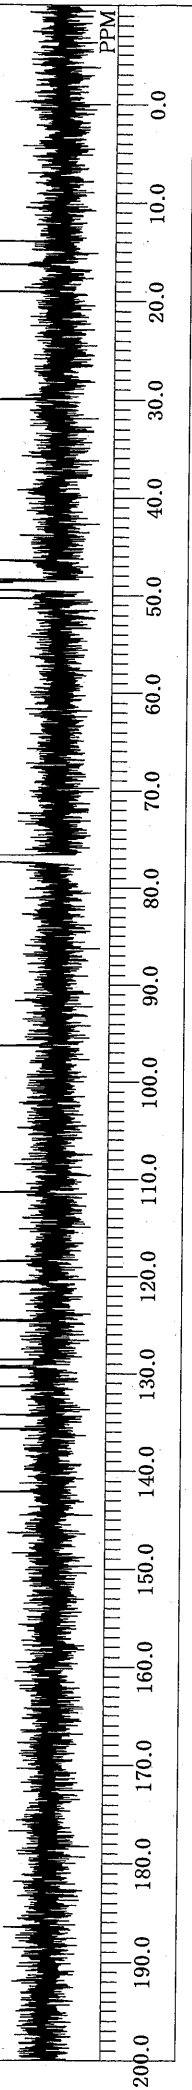

07KT5-54-1(400, CDCl<sub>3</sub>)

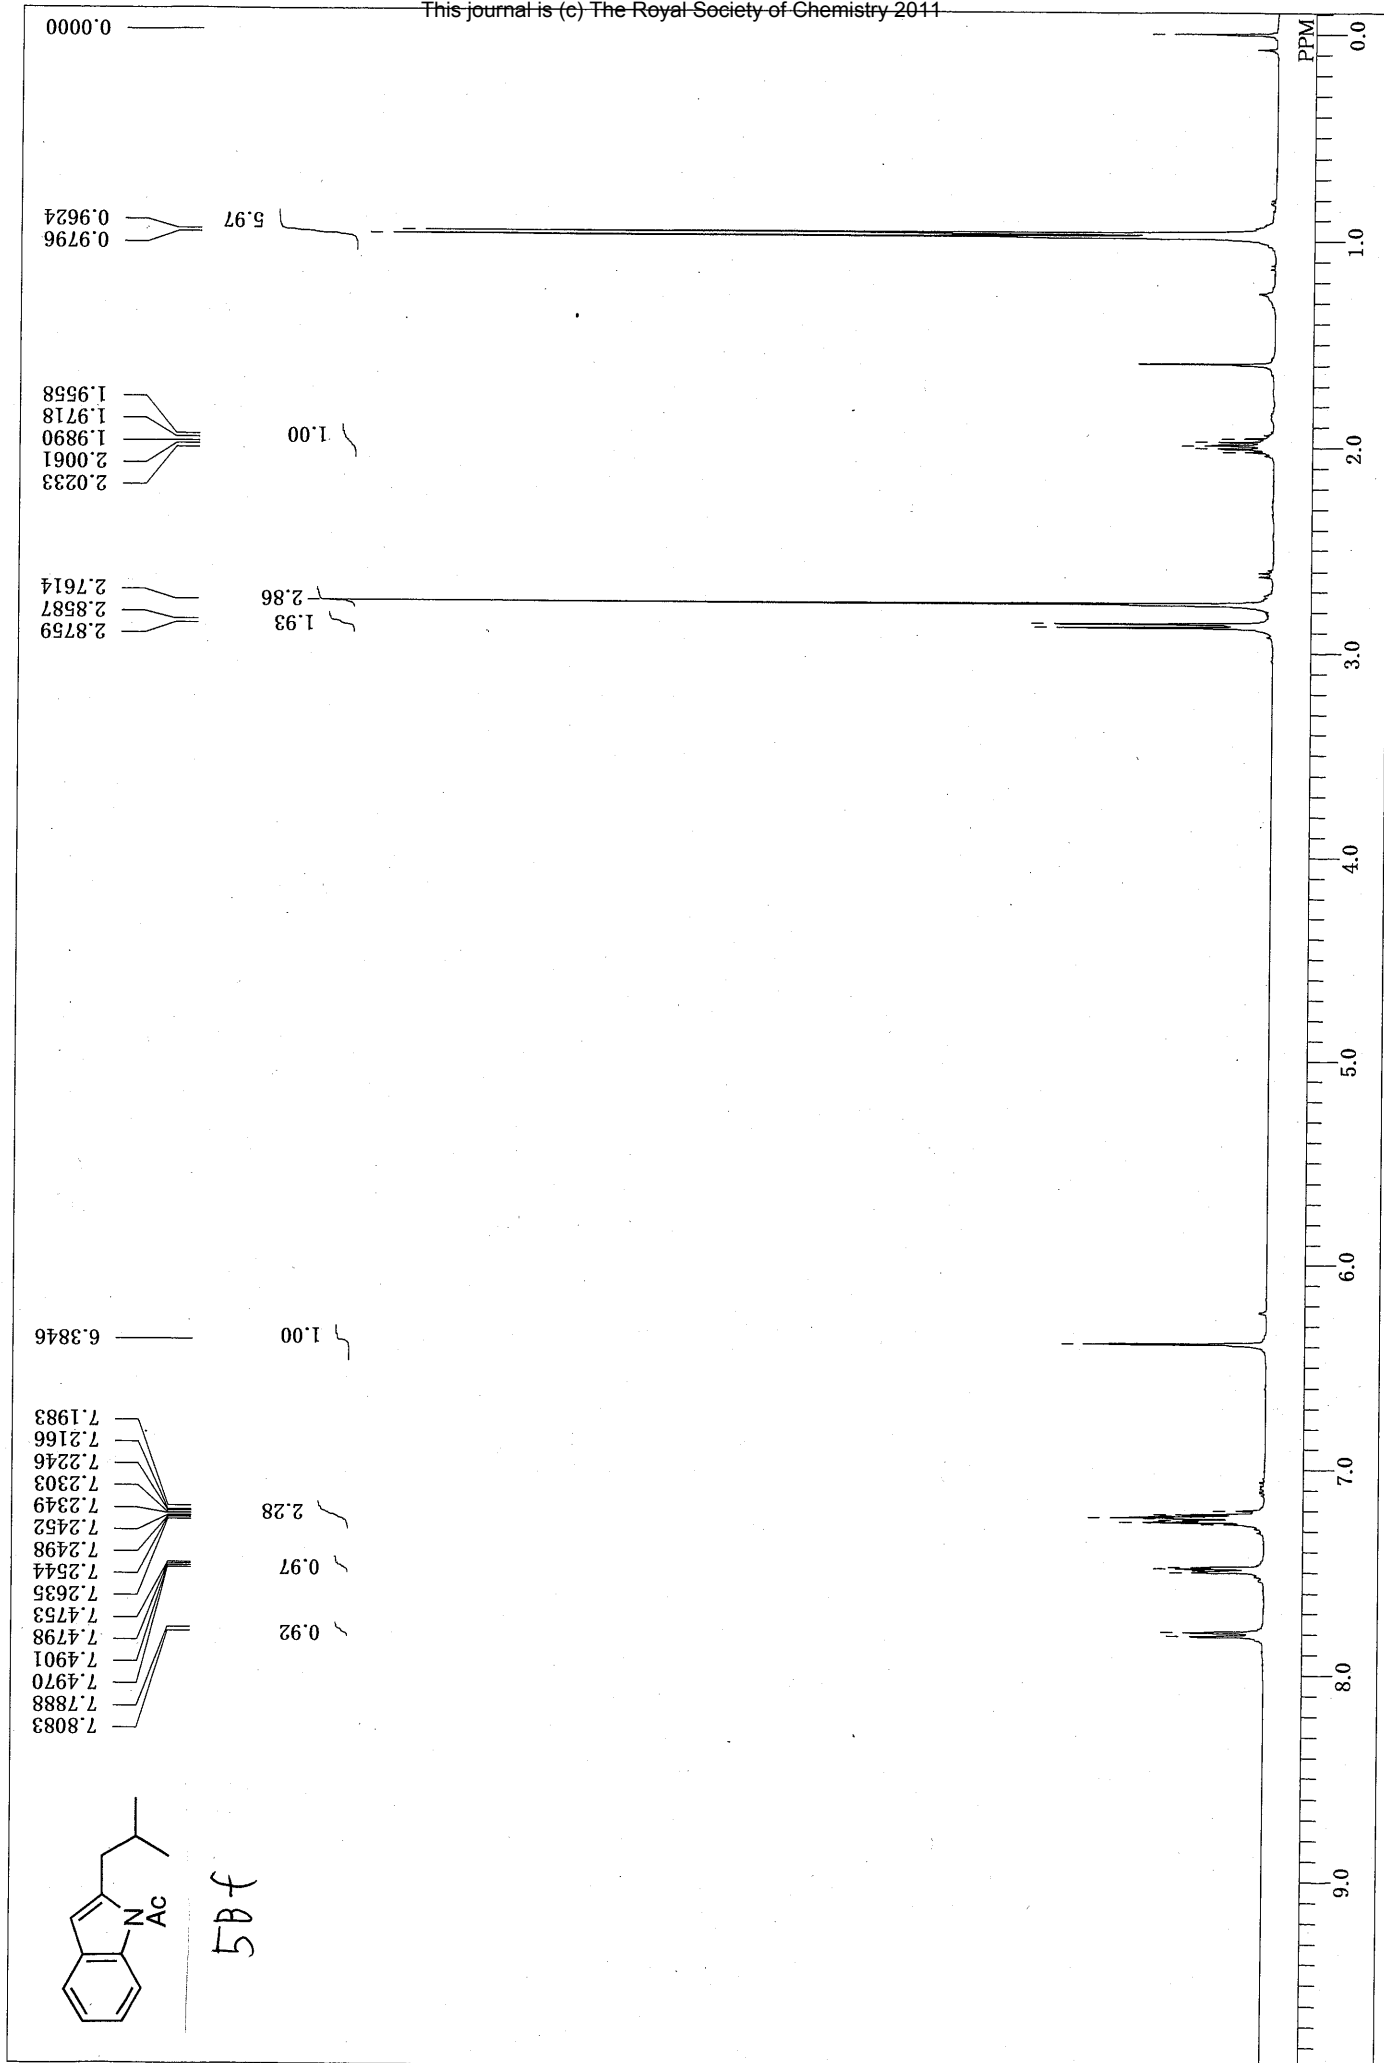

07KT5-54-1C(400, CDCI3)

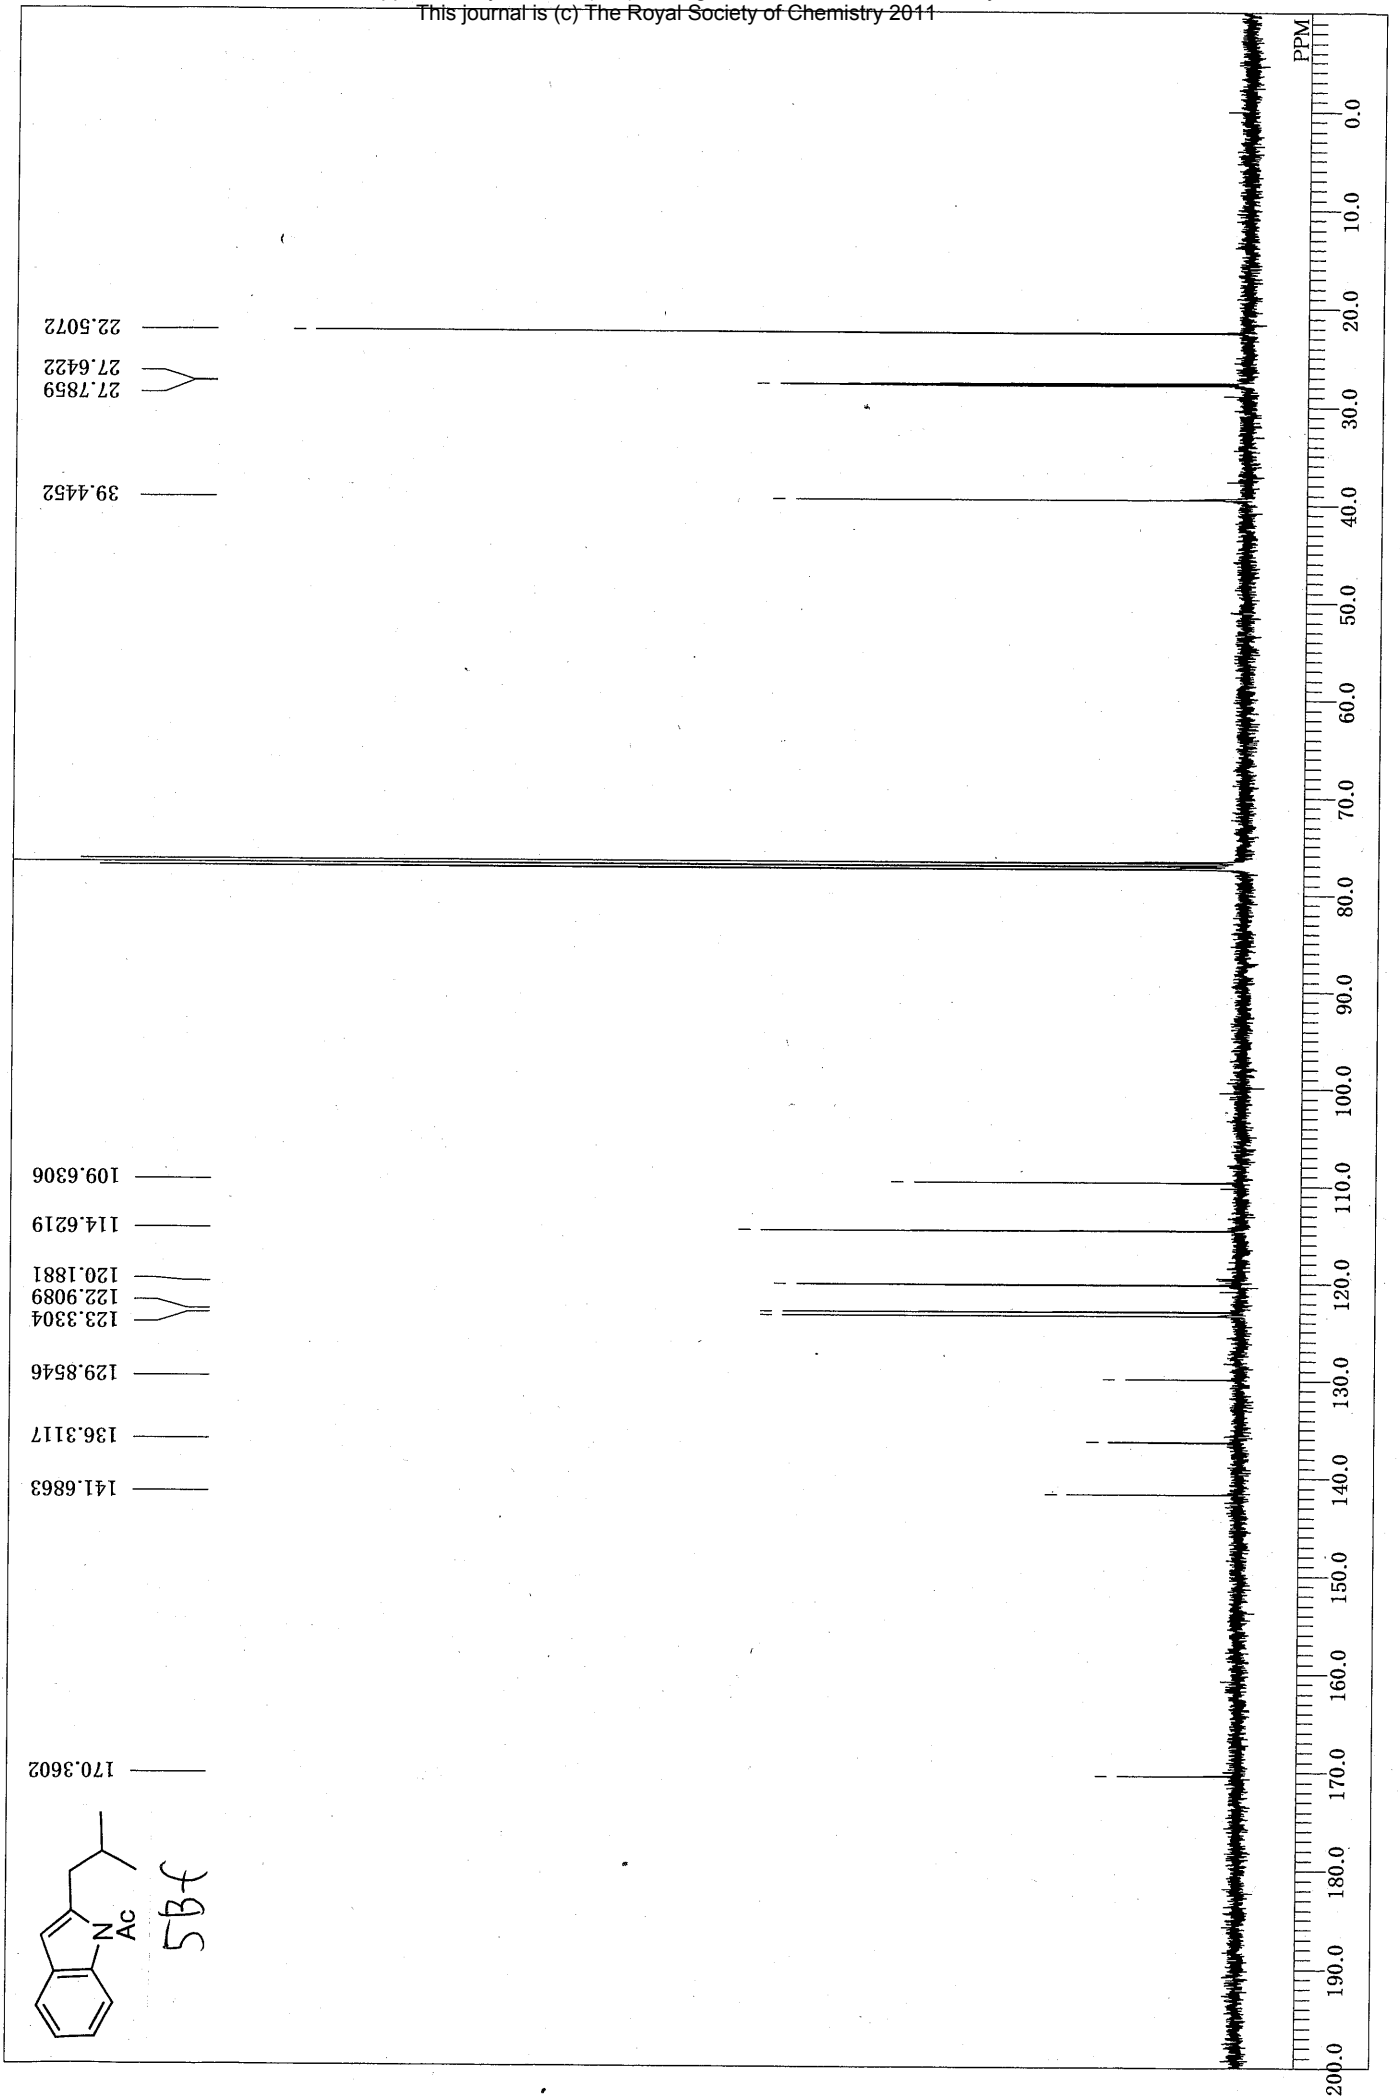





07KT4-62-1C(500,CDCl3)

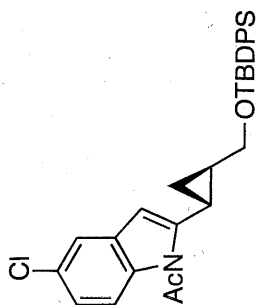

5 Bg

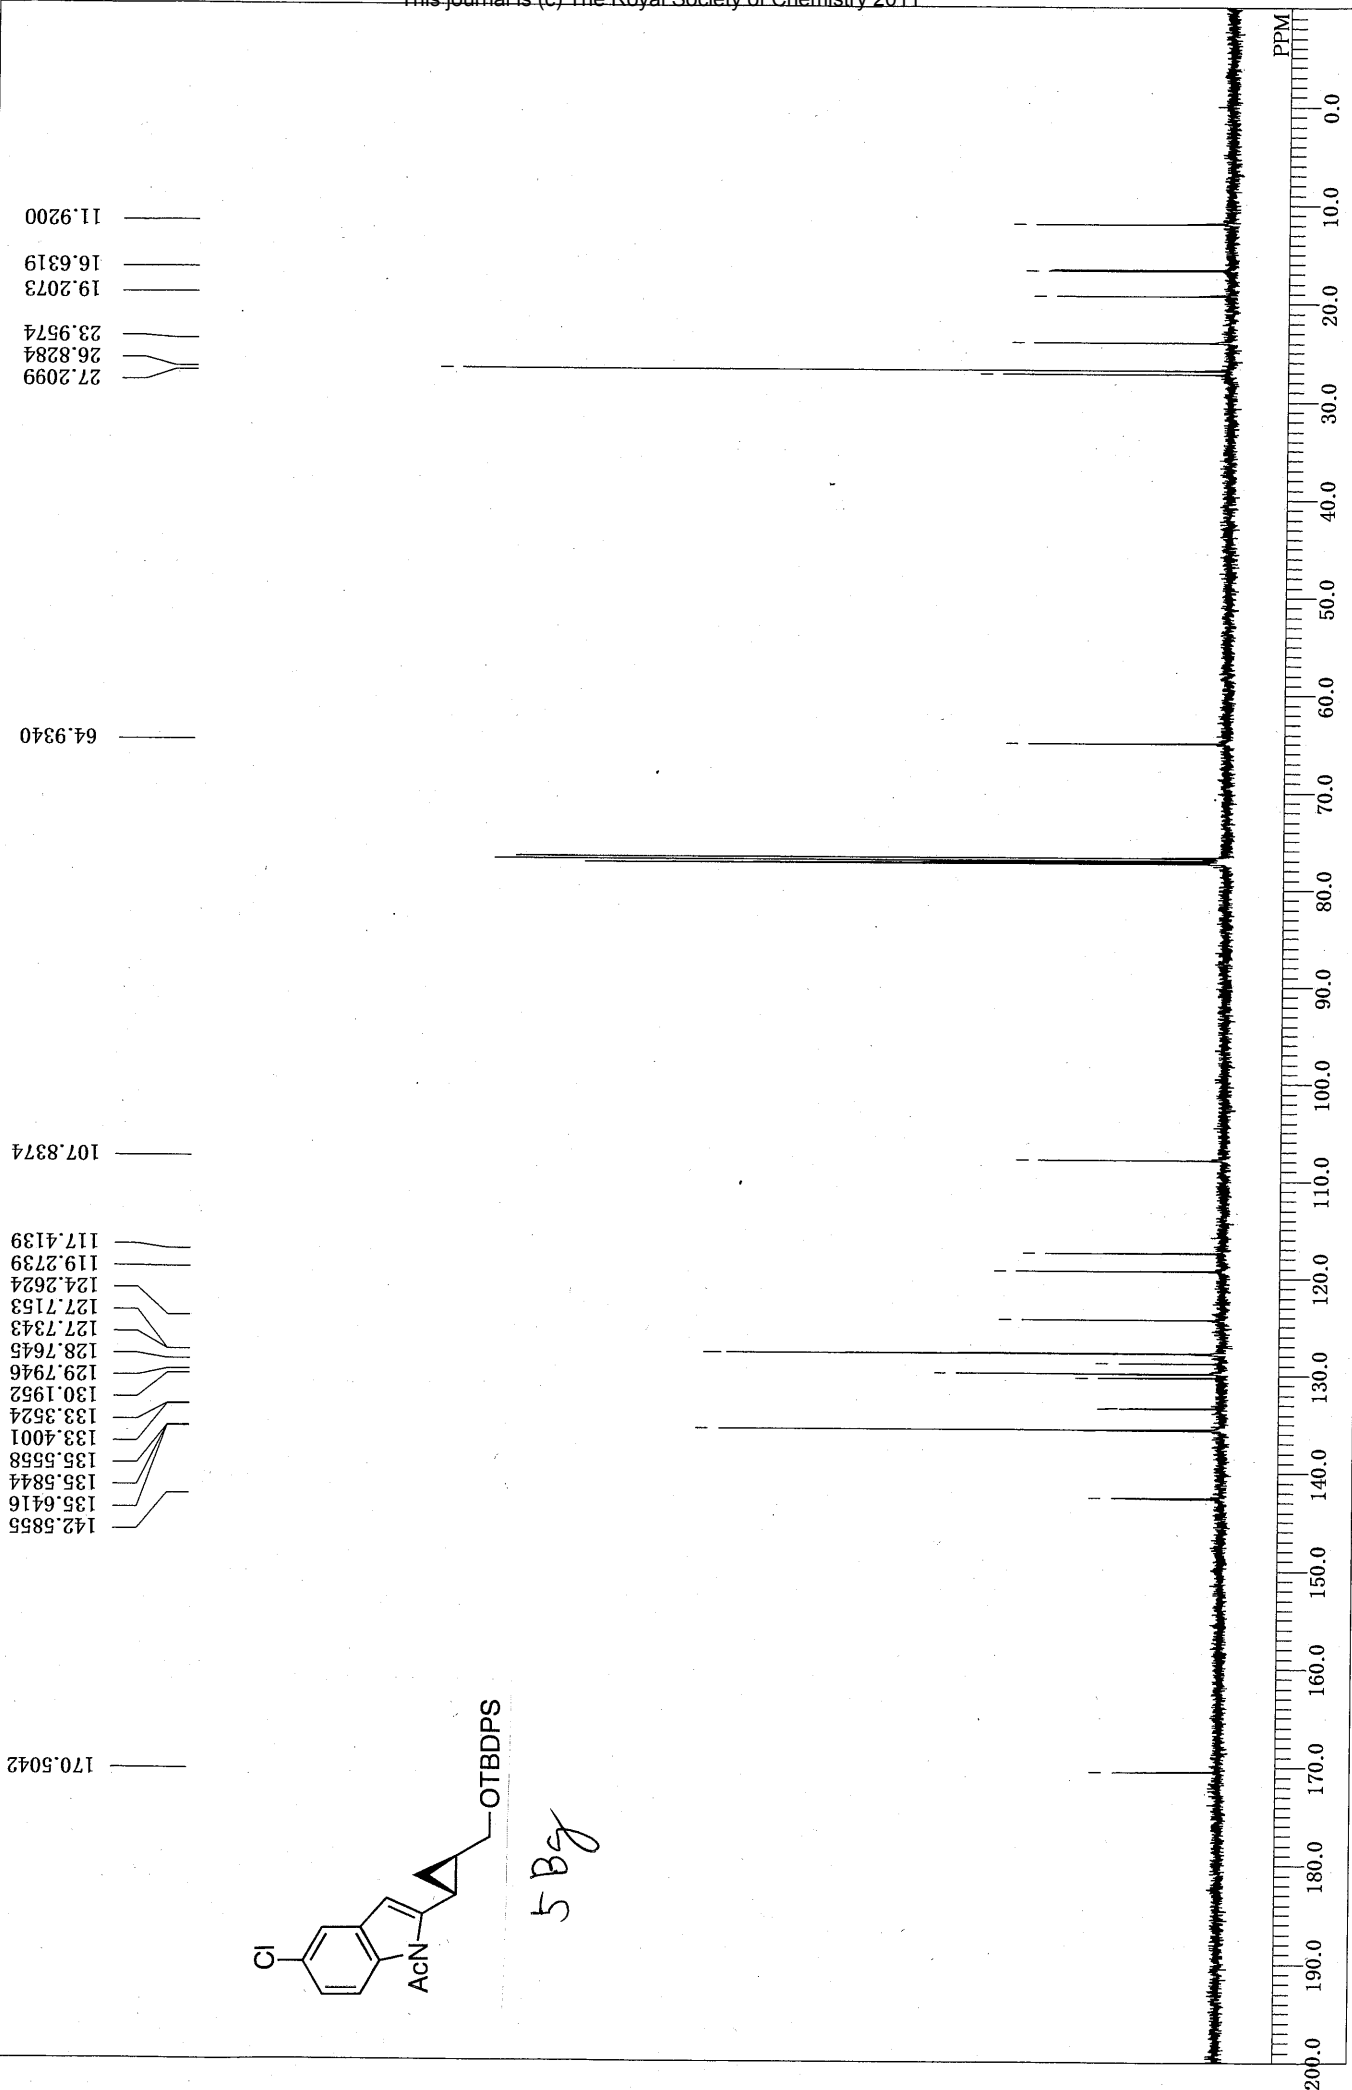

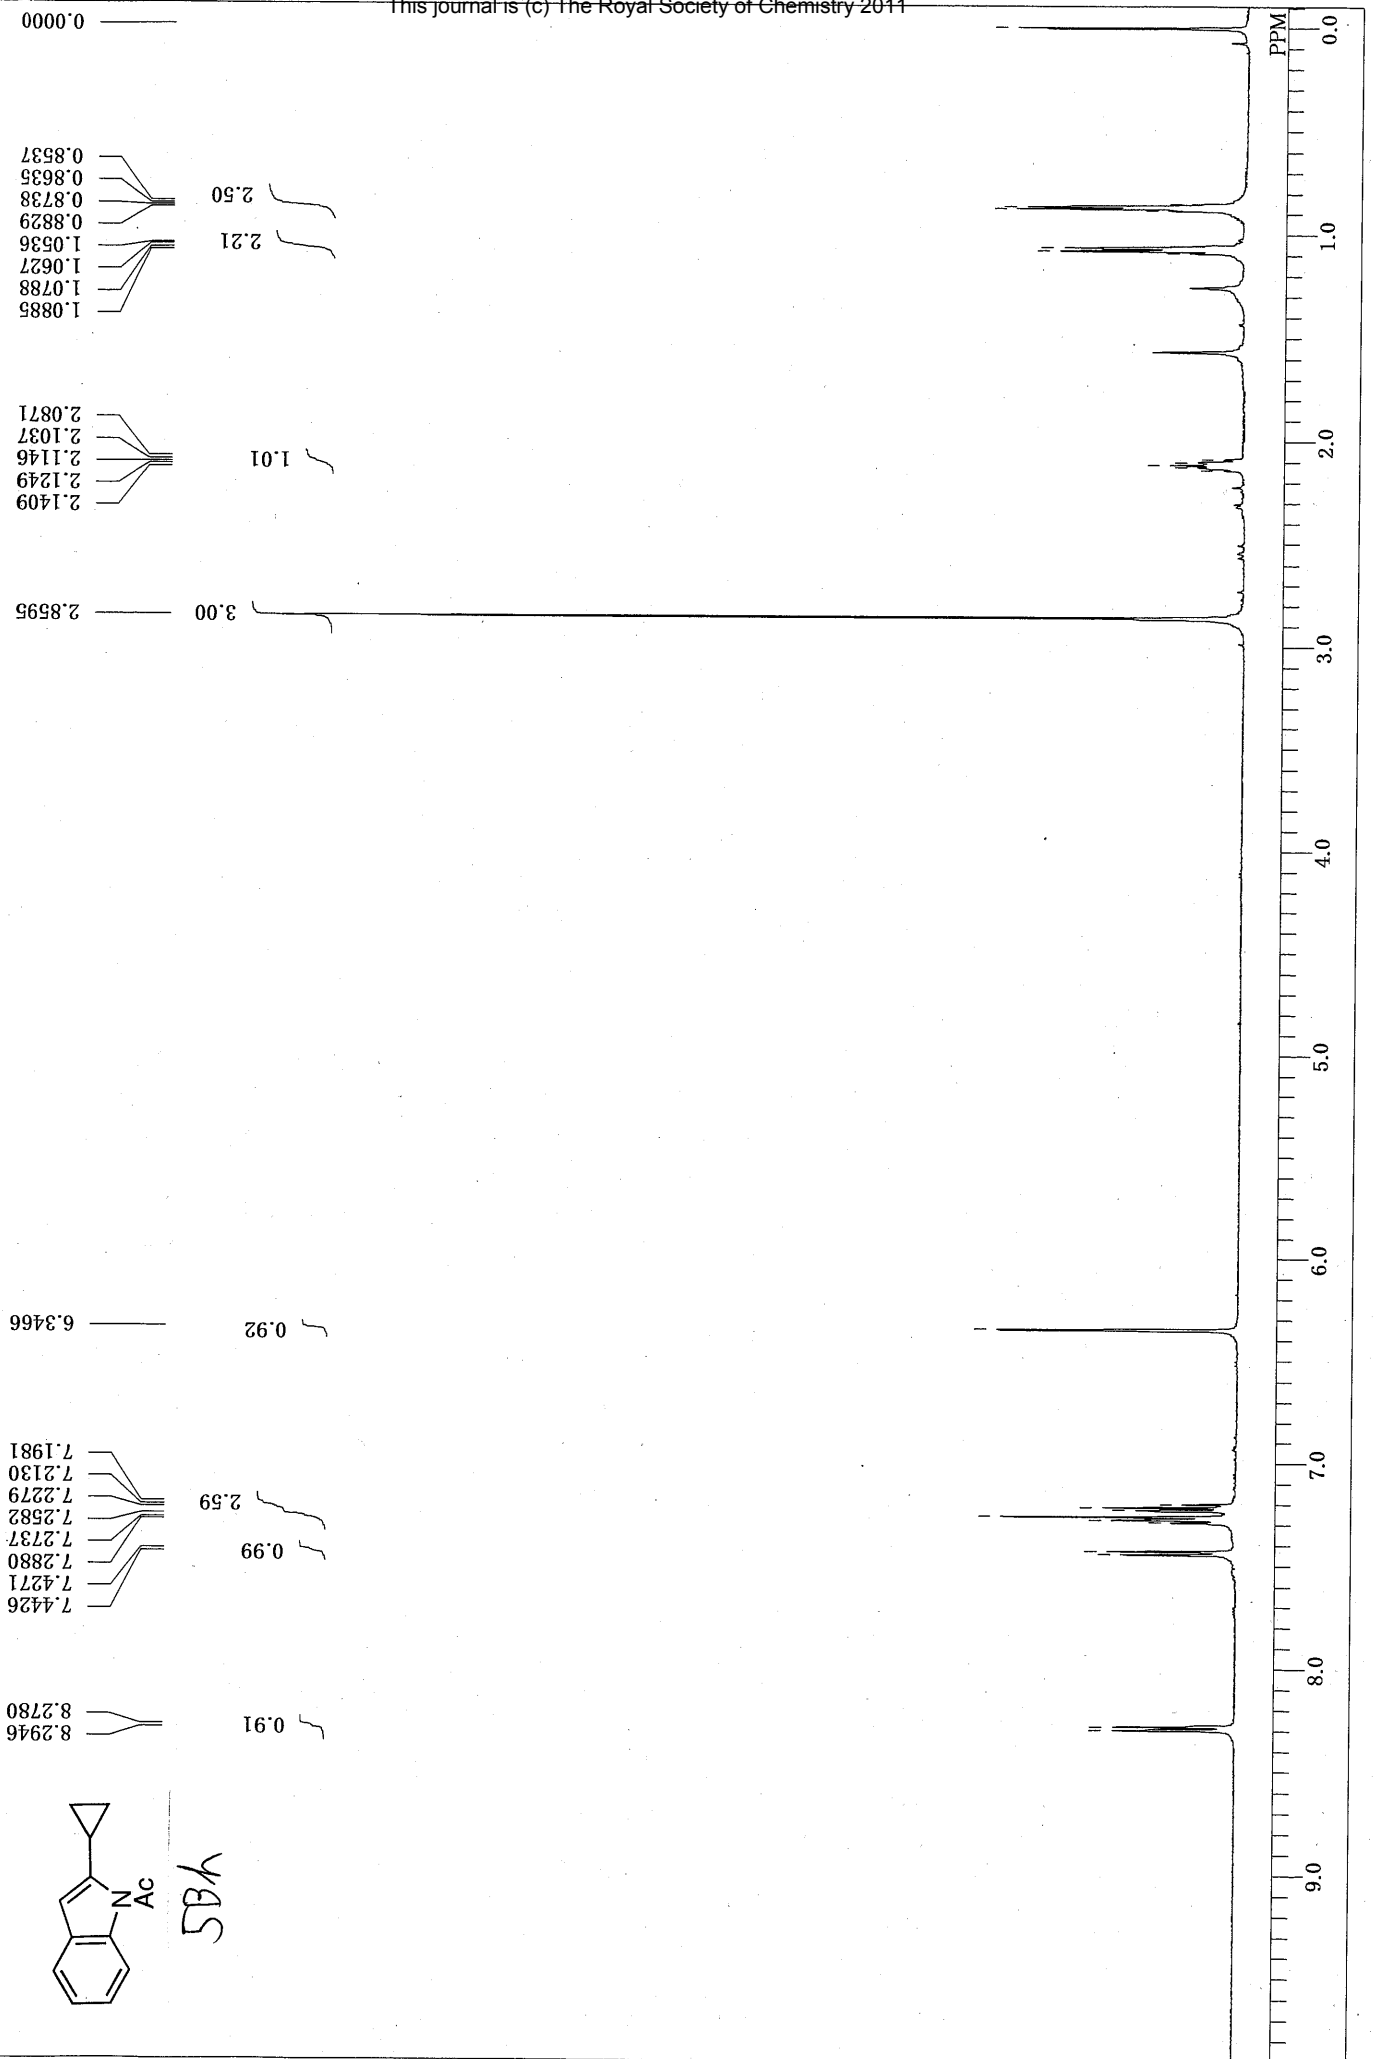

07KT3-86-1(500,CDCl3)

07KT3-86-1C(500, CDCl<sub>3</sub>)

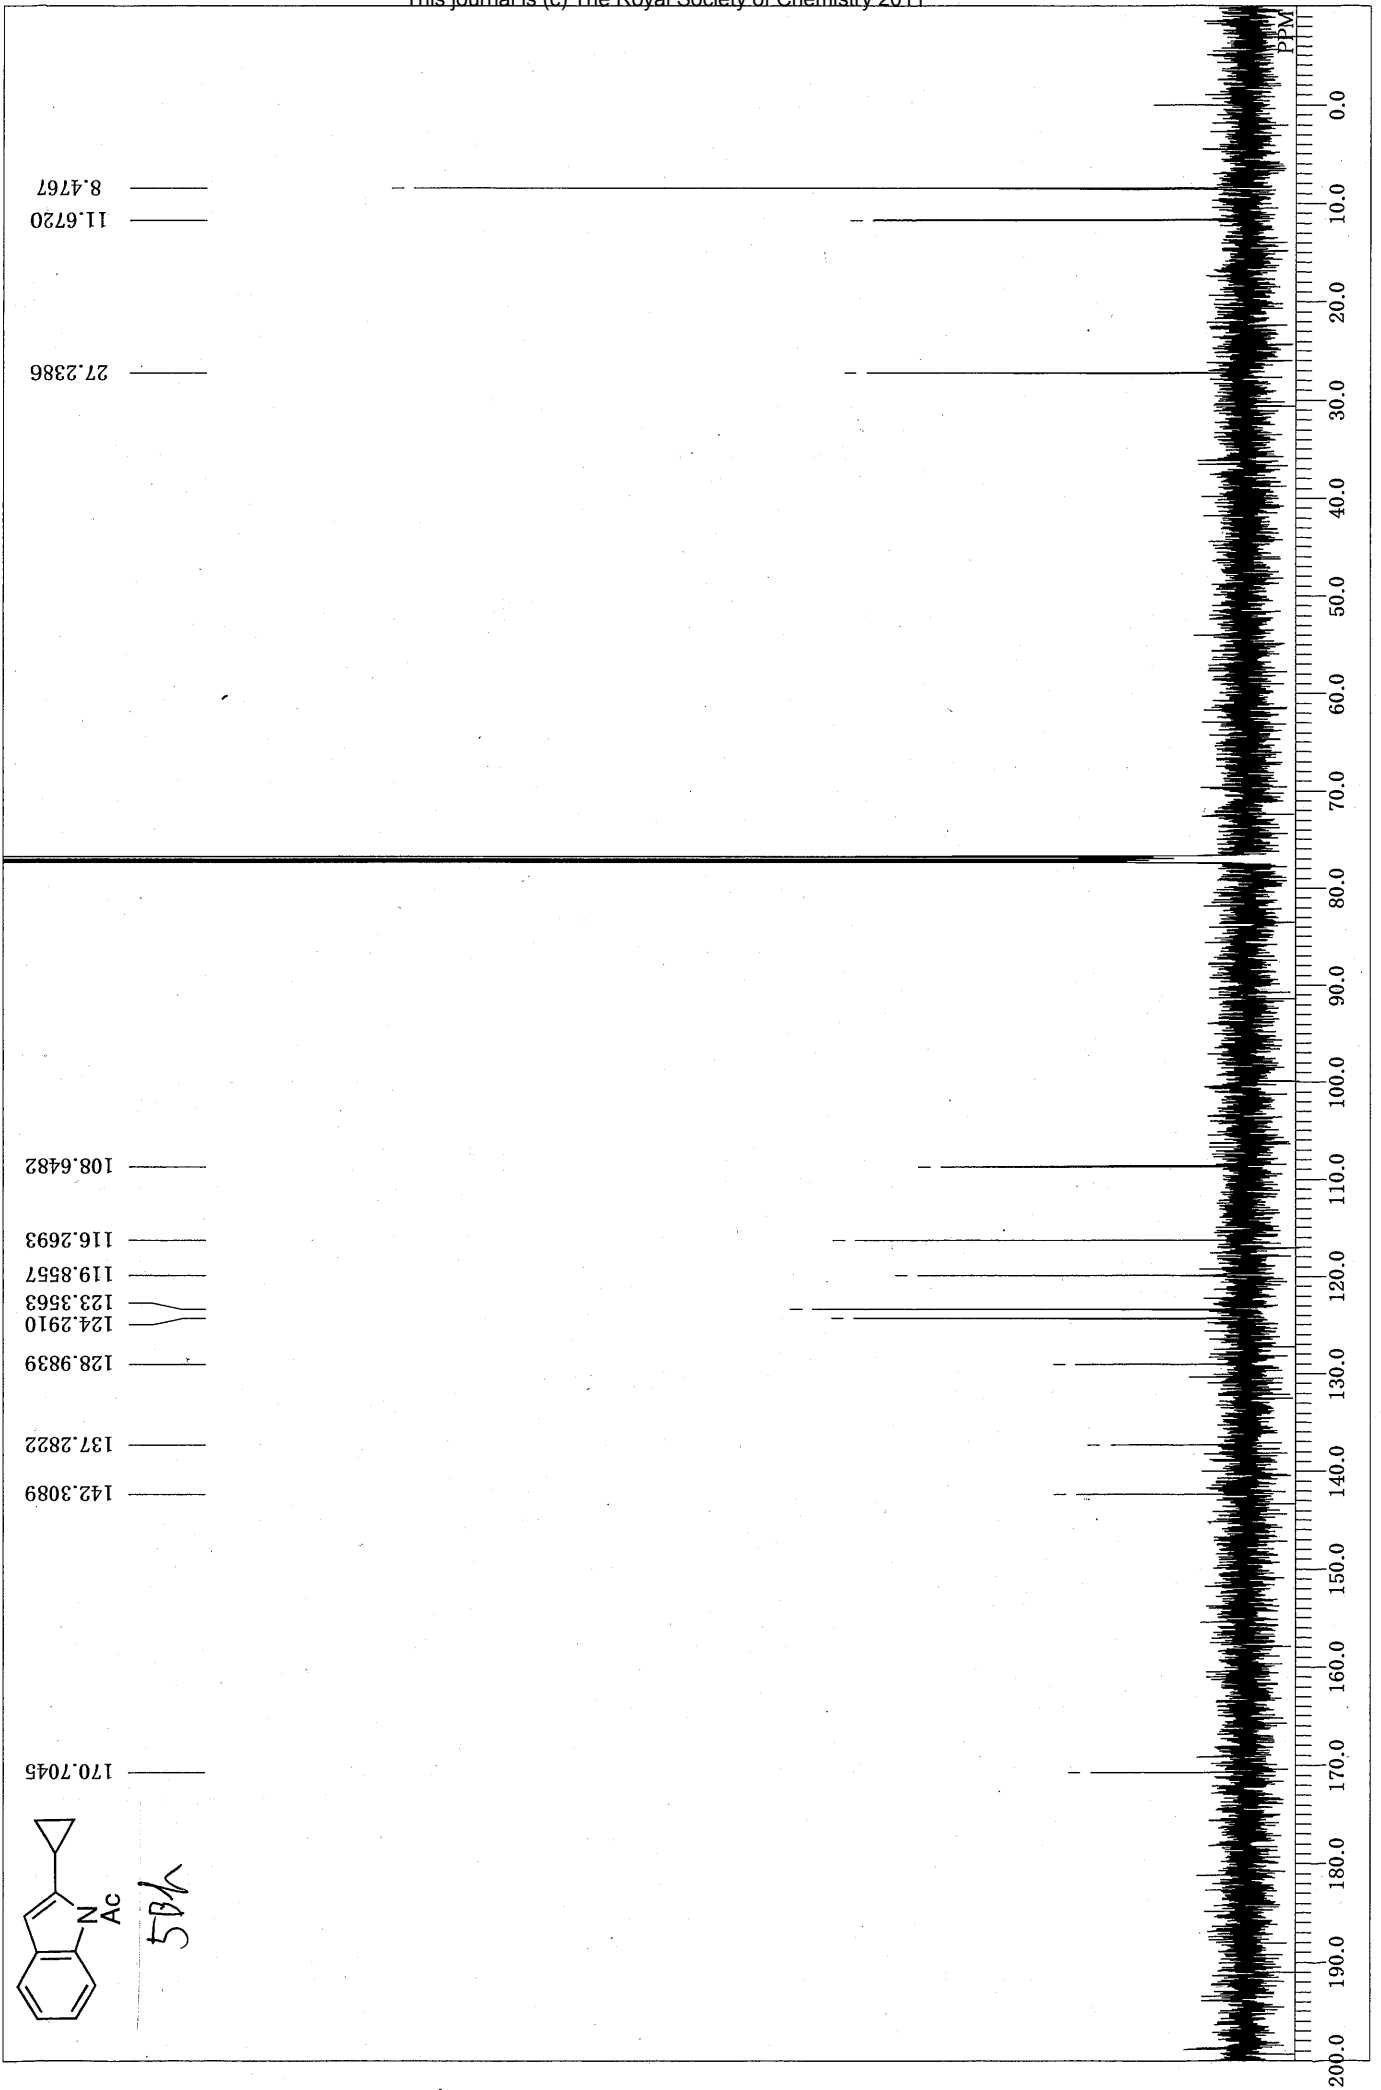

07KT5-55-2(400, CDCl<sub>3</sub>, t55)

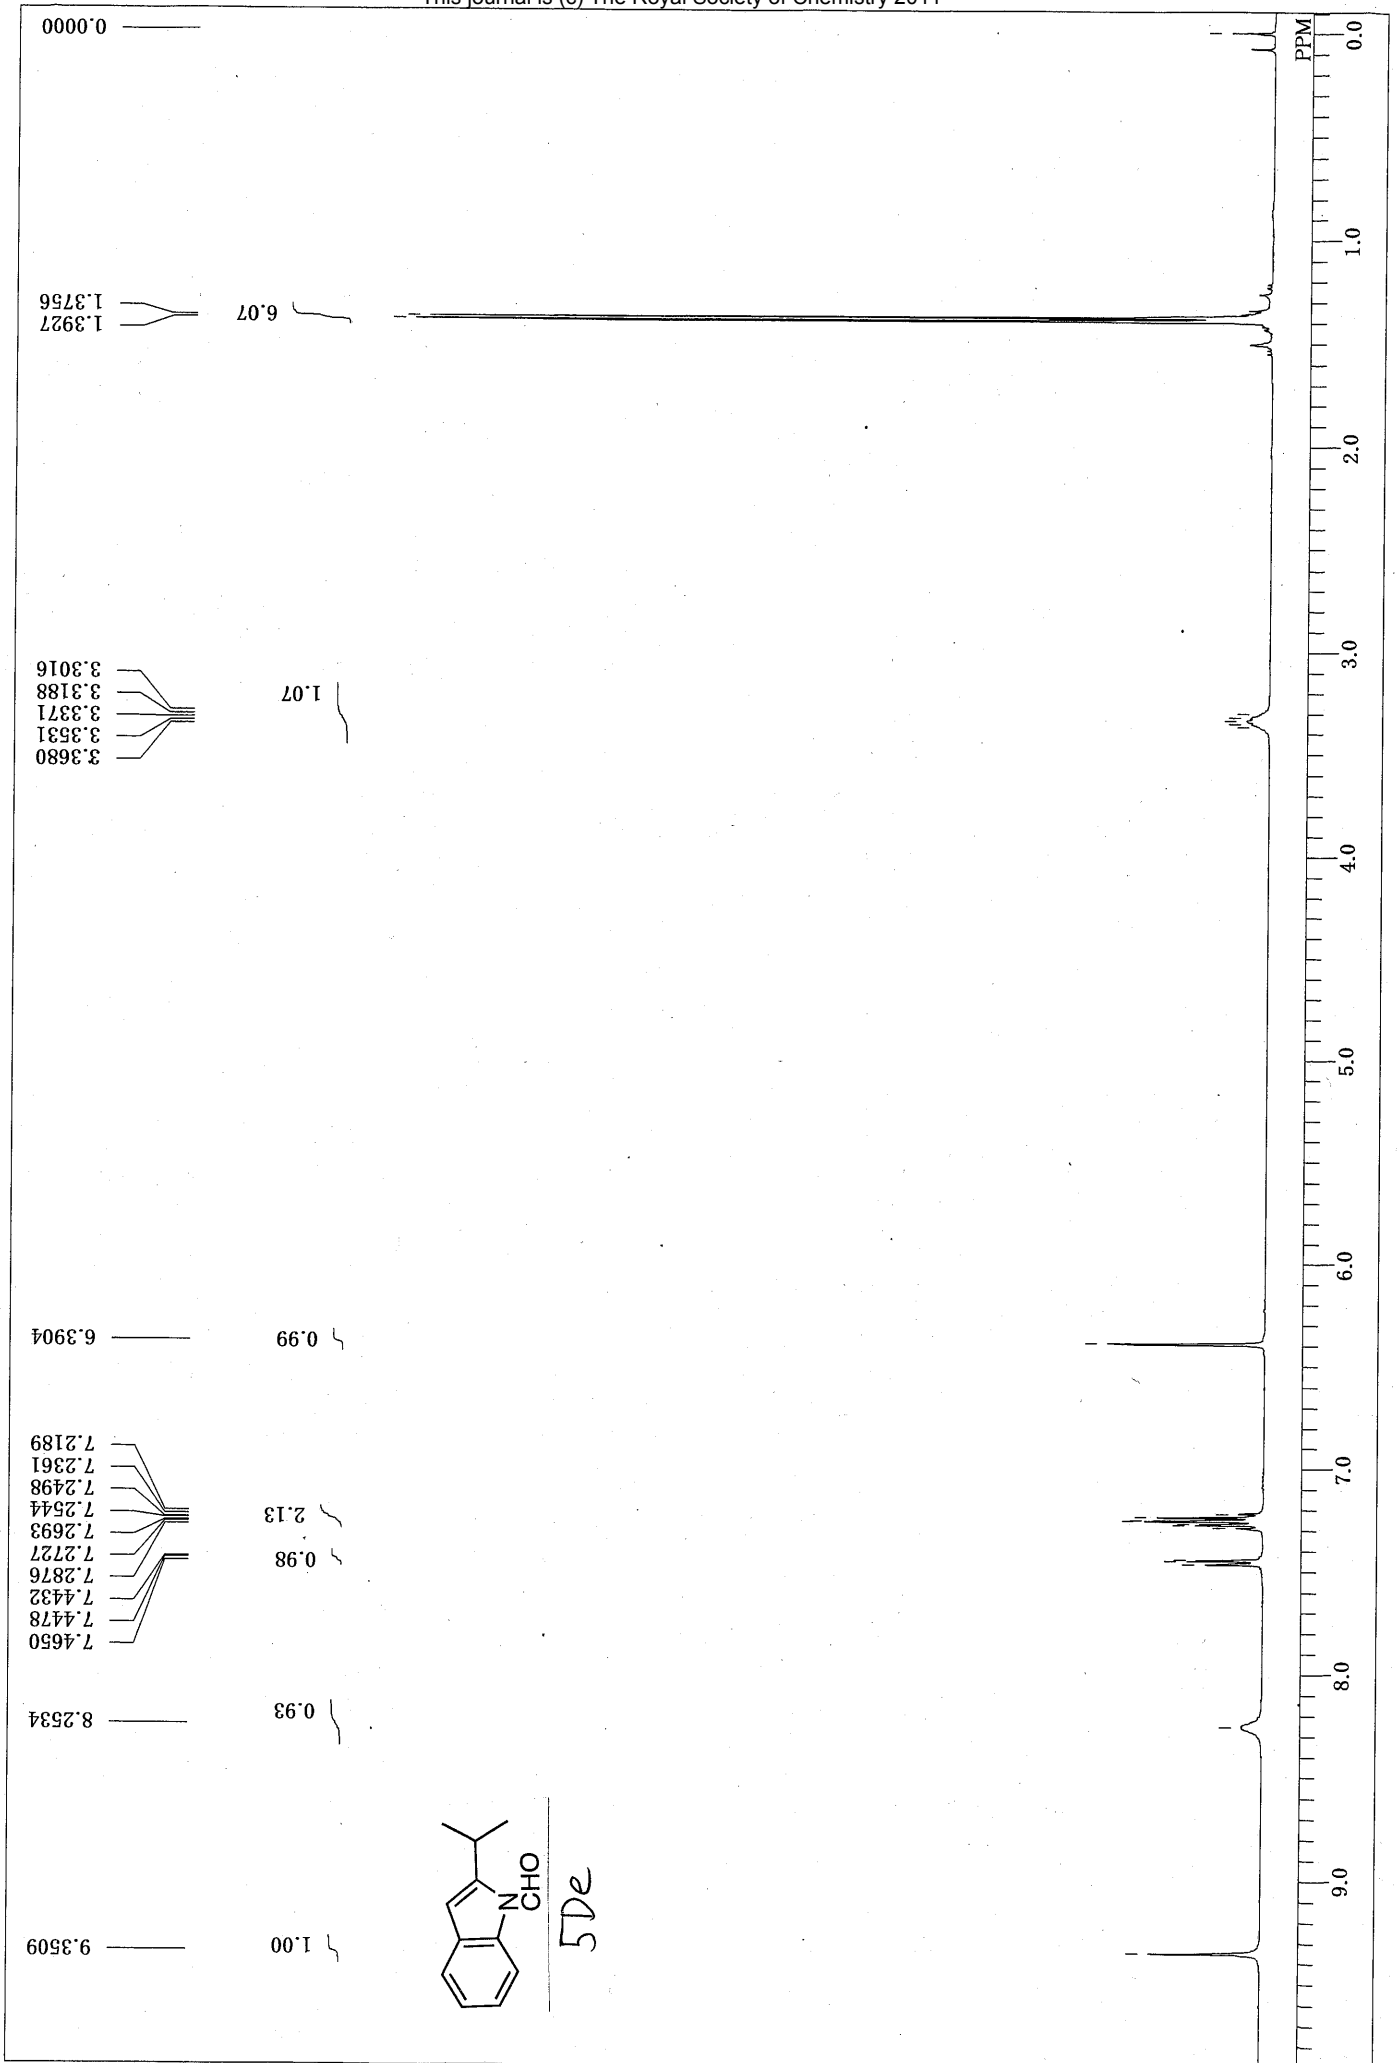

07KT5-55-2C(400,CDCl3,t55)

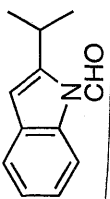

|          |   |
|----------|---|
| 158.3369 | — |
| 146.5627 | — |
| 135.8519 | — |
| 129.8738 | — |
| 124.3842 | — |
| 124.2310 | — |
| 120.1785 | — |
| 115.0147 | — |
| 105.8272 | — |
| 26.0806  | — |
| 22.6221  | — |

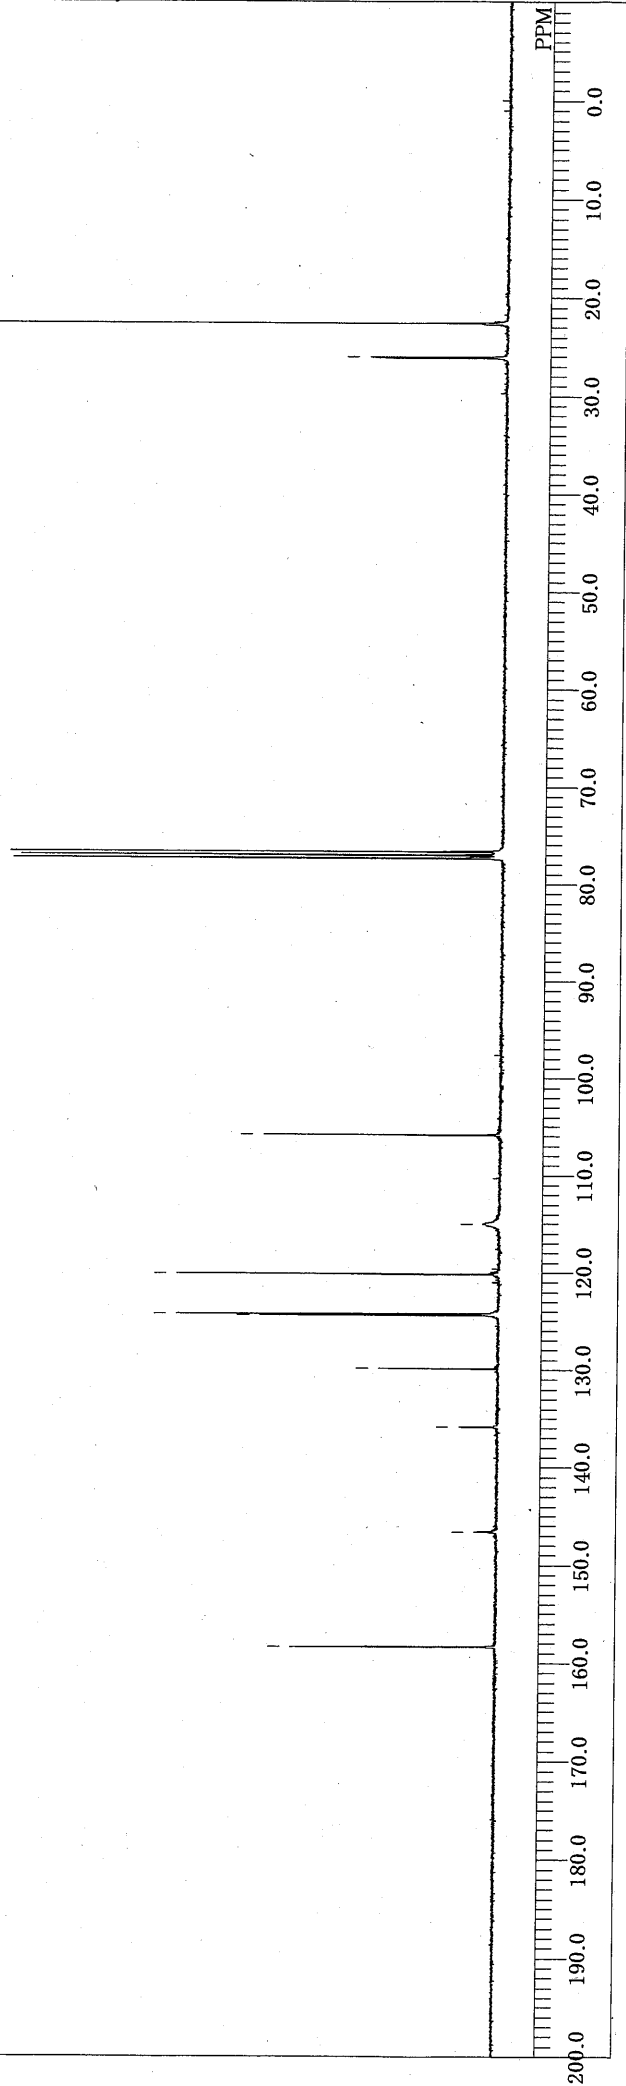

07KT4-17-1(500, CDCl<sub>3</sub>, t60)

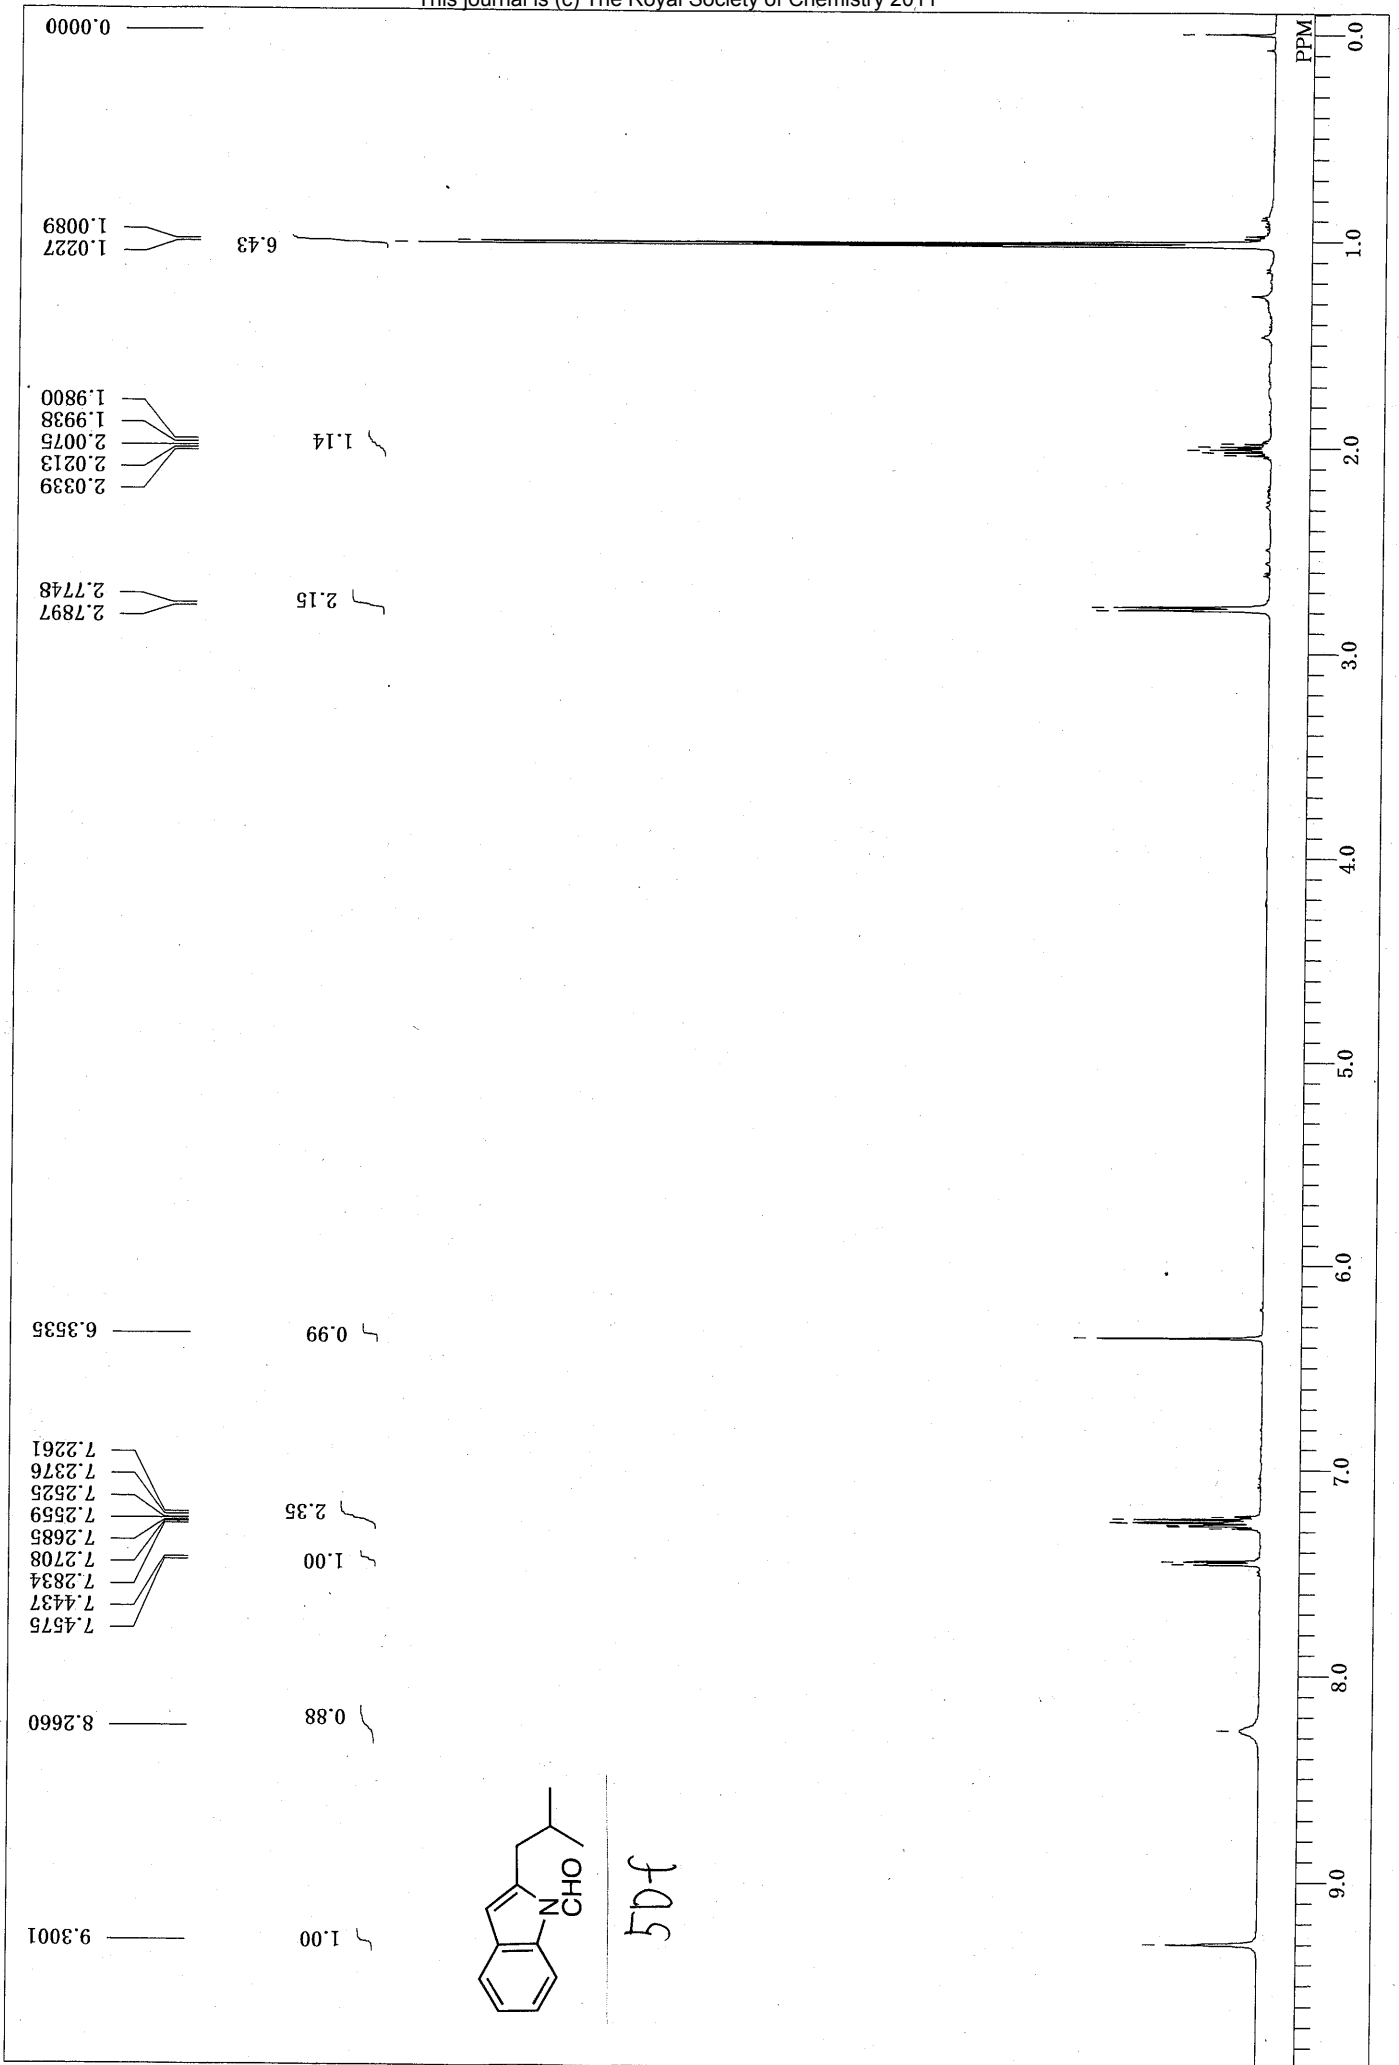

07KT4-17-1C(500, CDCl<sub>3</sub>, t50)

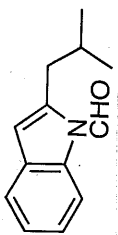

50f

|          |   |
|----------|---|
| 158.3905 | — |
| 138.9419 | — |
| 135.6416 | — |
| 129.8614 | — |
| 124.3387 | — |
| 124.2719 | — |
| 120.0178 | — |
| 115.1819 | — |
| 109.4017 | — |

|         |   |
|---------|---|
| 36.3477 | — |
| 28.4213 | — |
| 22.4885 | — |

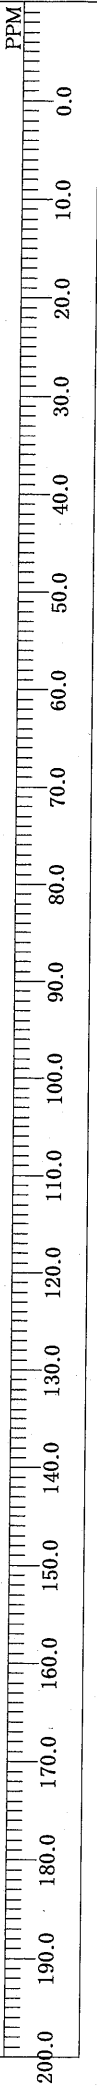



07KT5-56-1(500, CDCl<sub>3</sub>, t55)

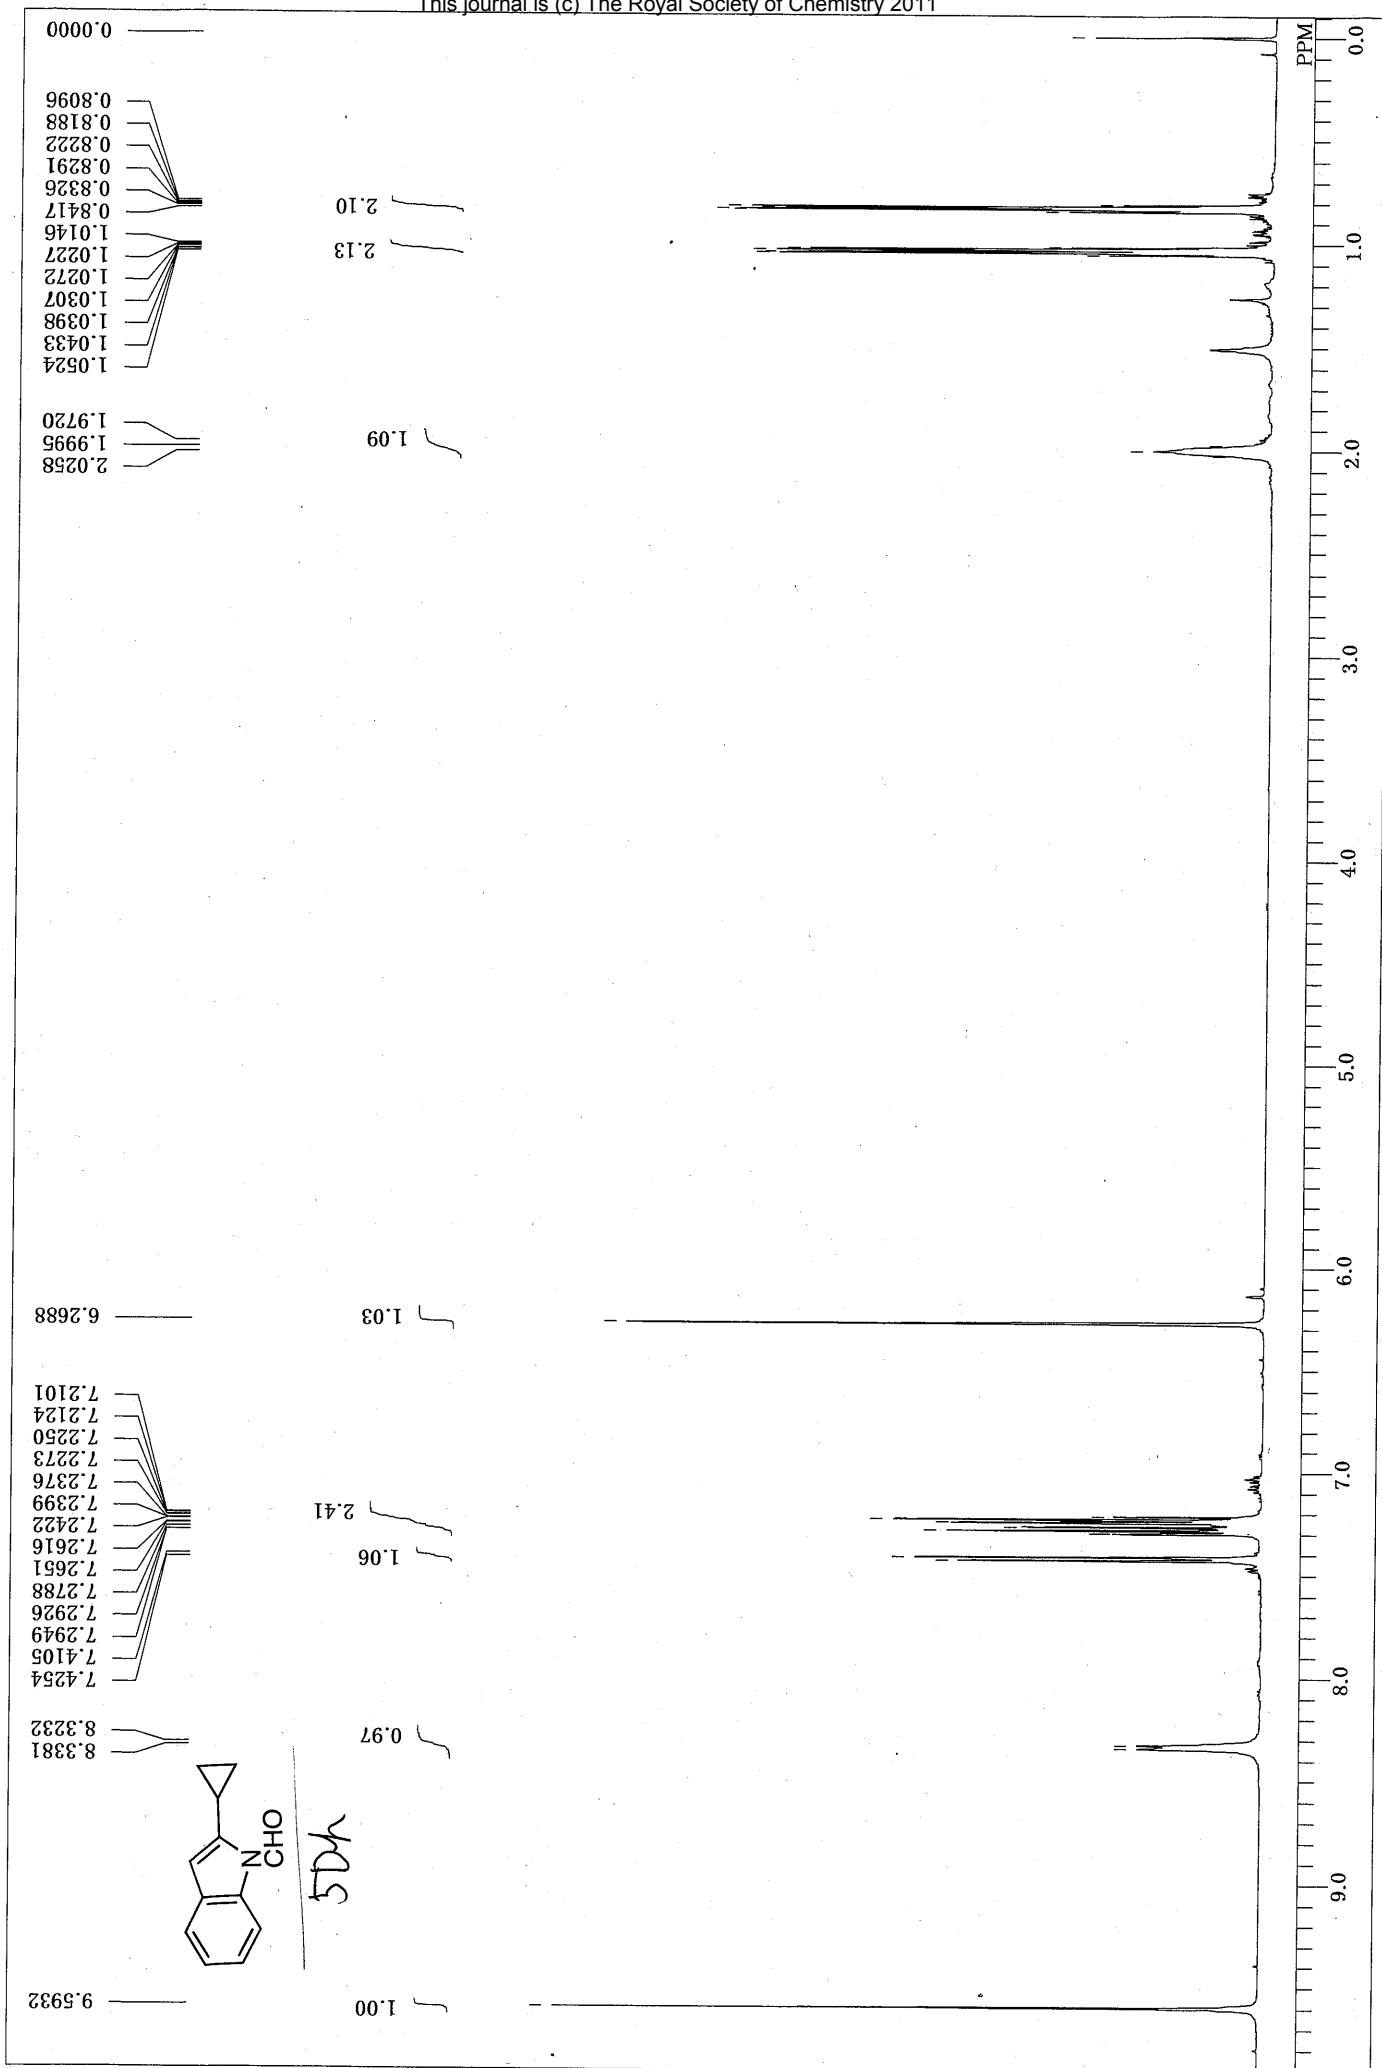

07KT5-56-1C(500, CDCl<sub>3</sub>, t55)

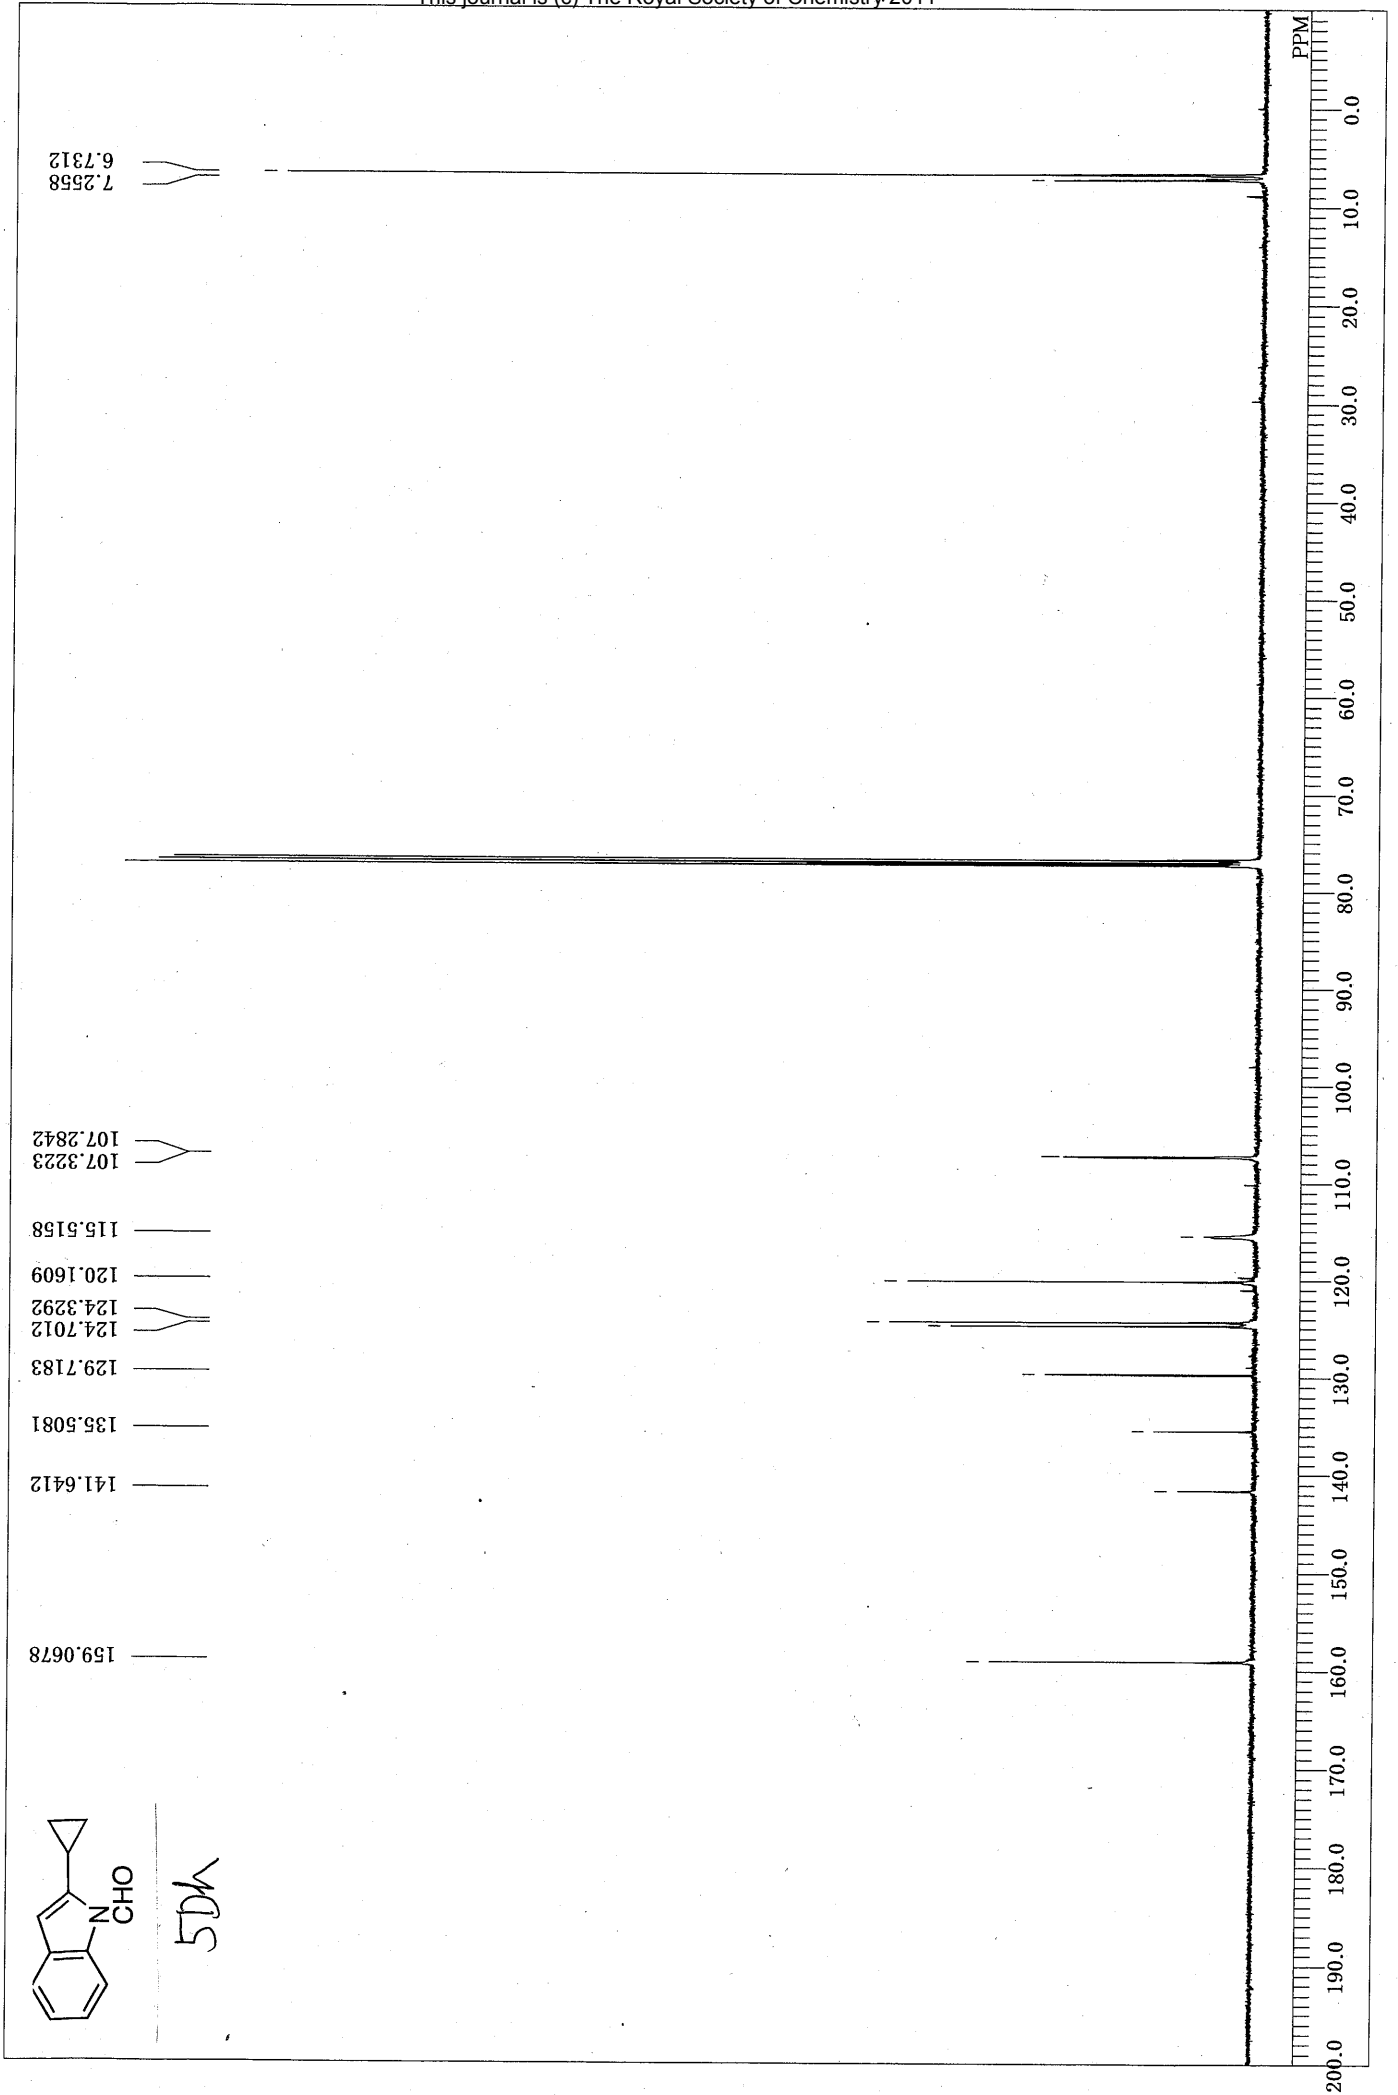

07KT5-92-1a(500, CDCl<sub>3</sub>, t55)

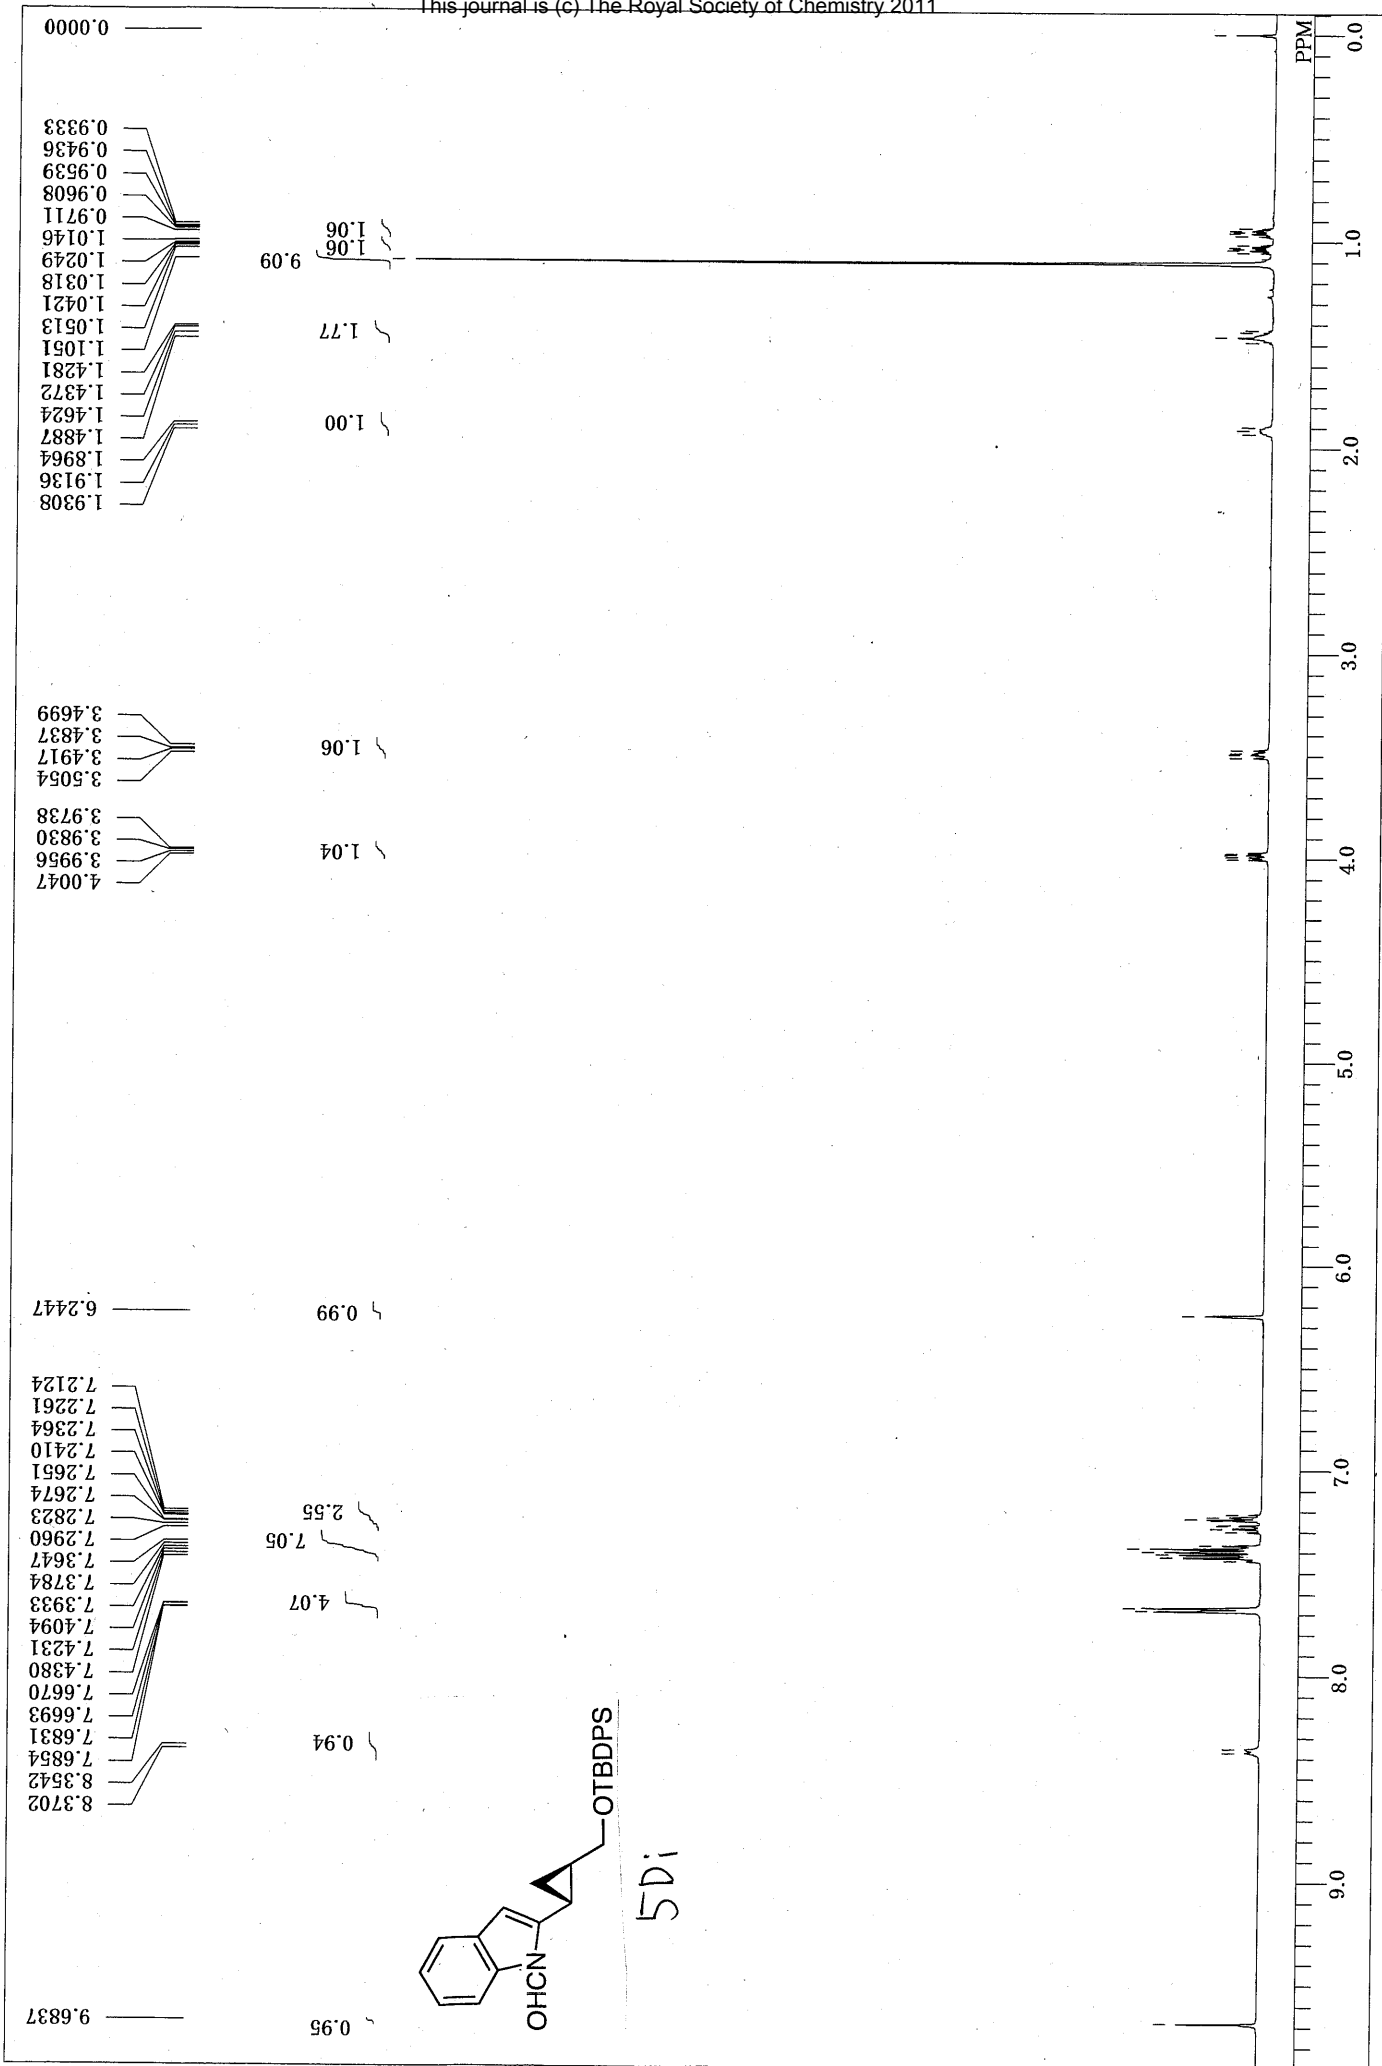

07KT5-92-1a C(500, CDCl<sub>3</sub>, t55)

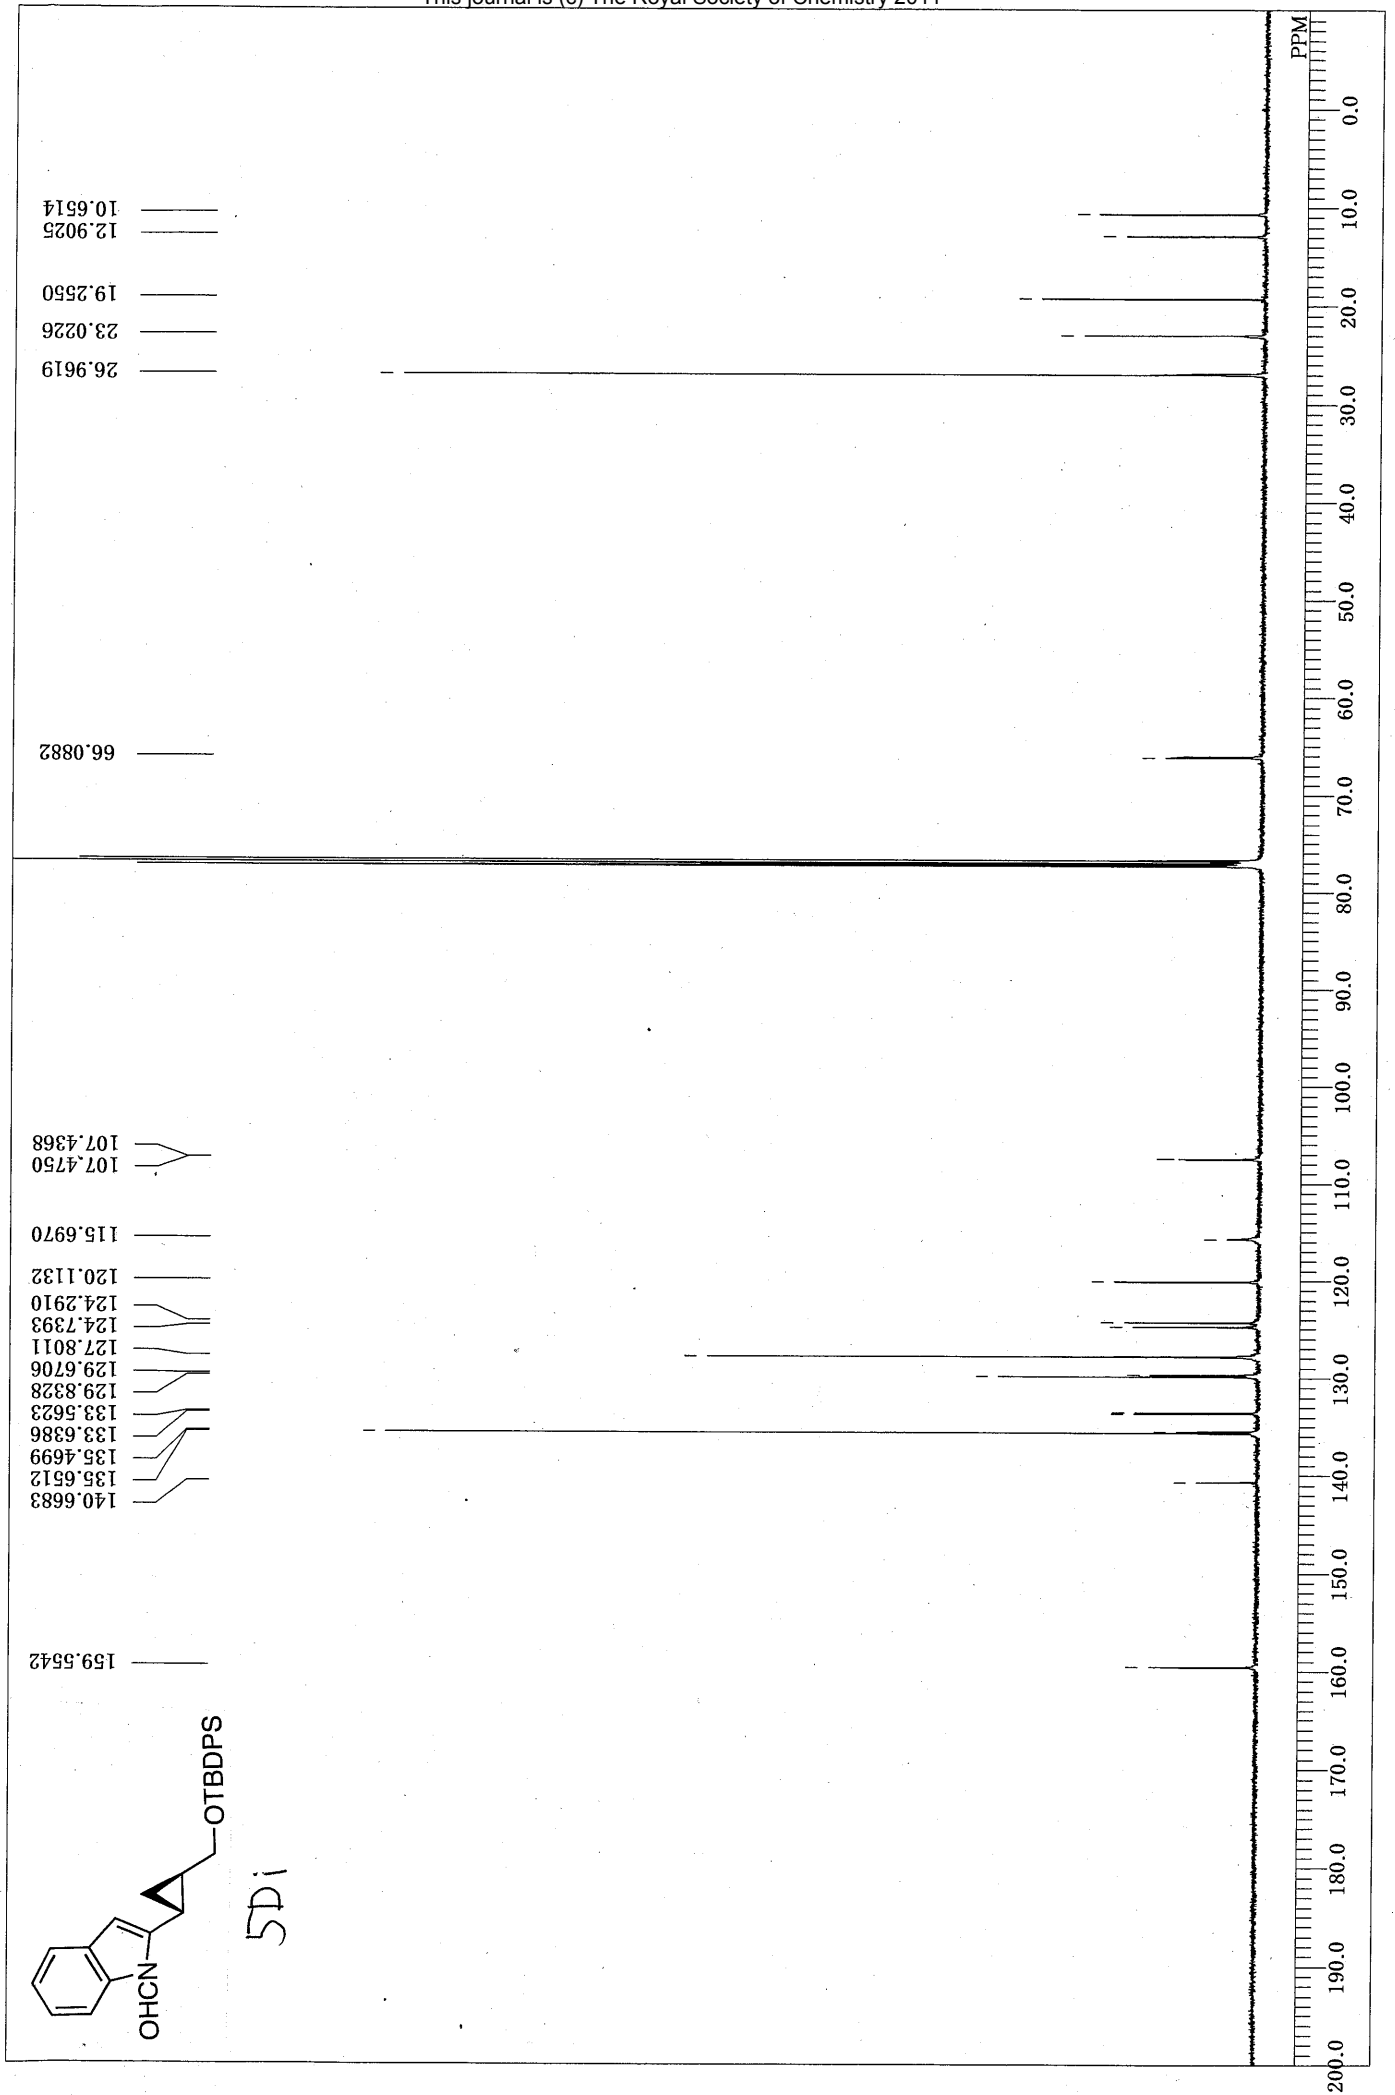

07KT4-59-1(500, CDCl<sub>3</sub>)

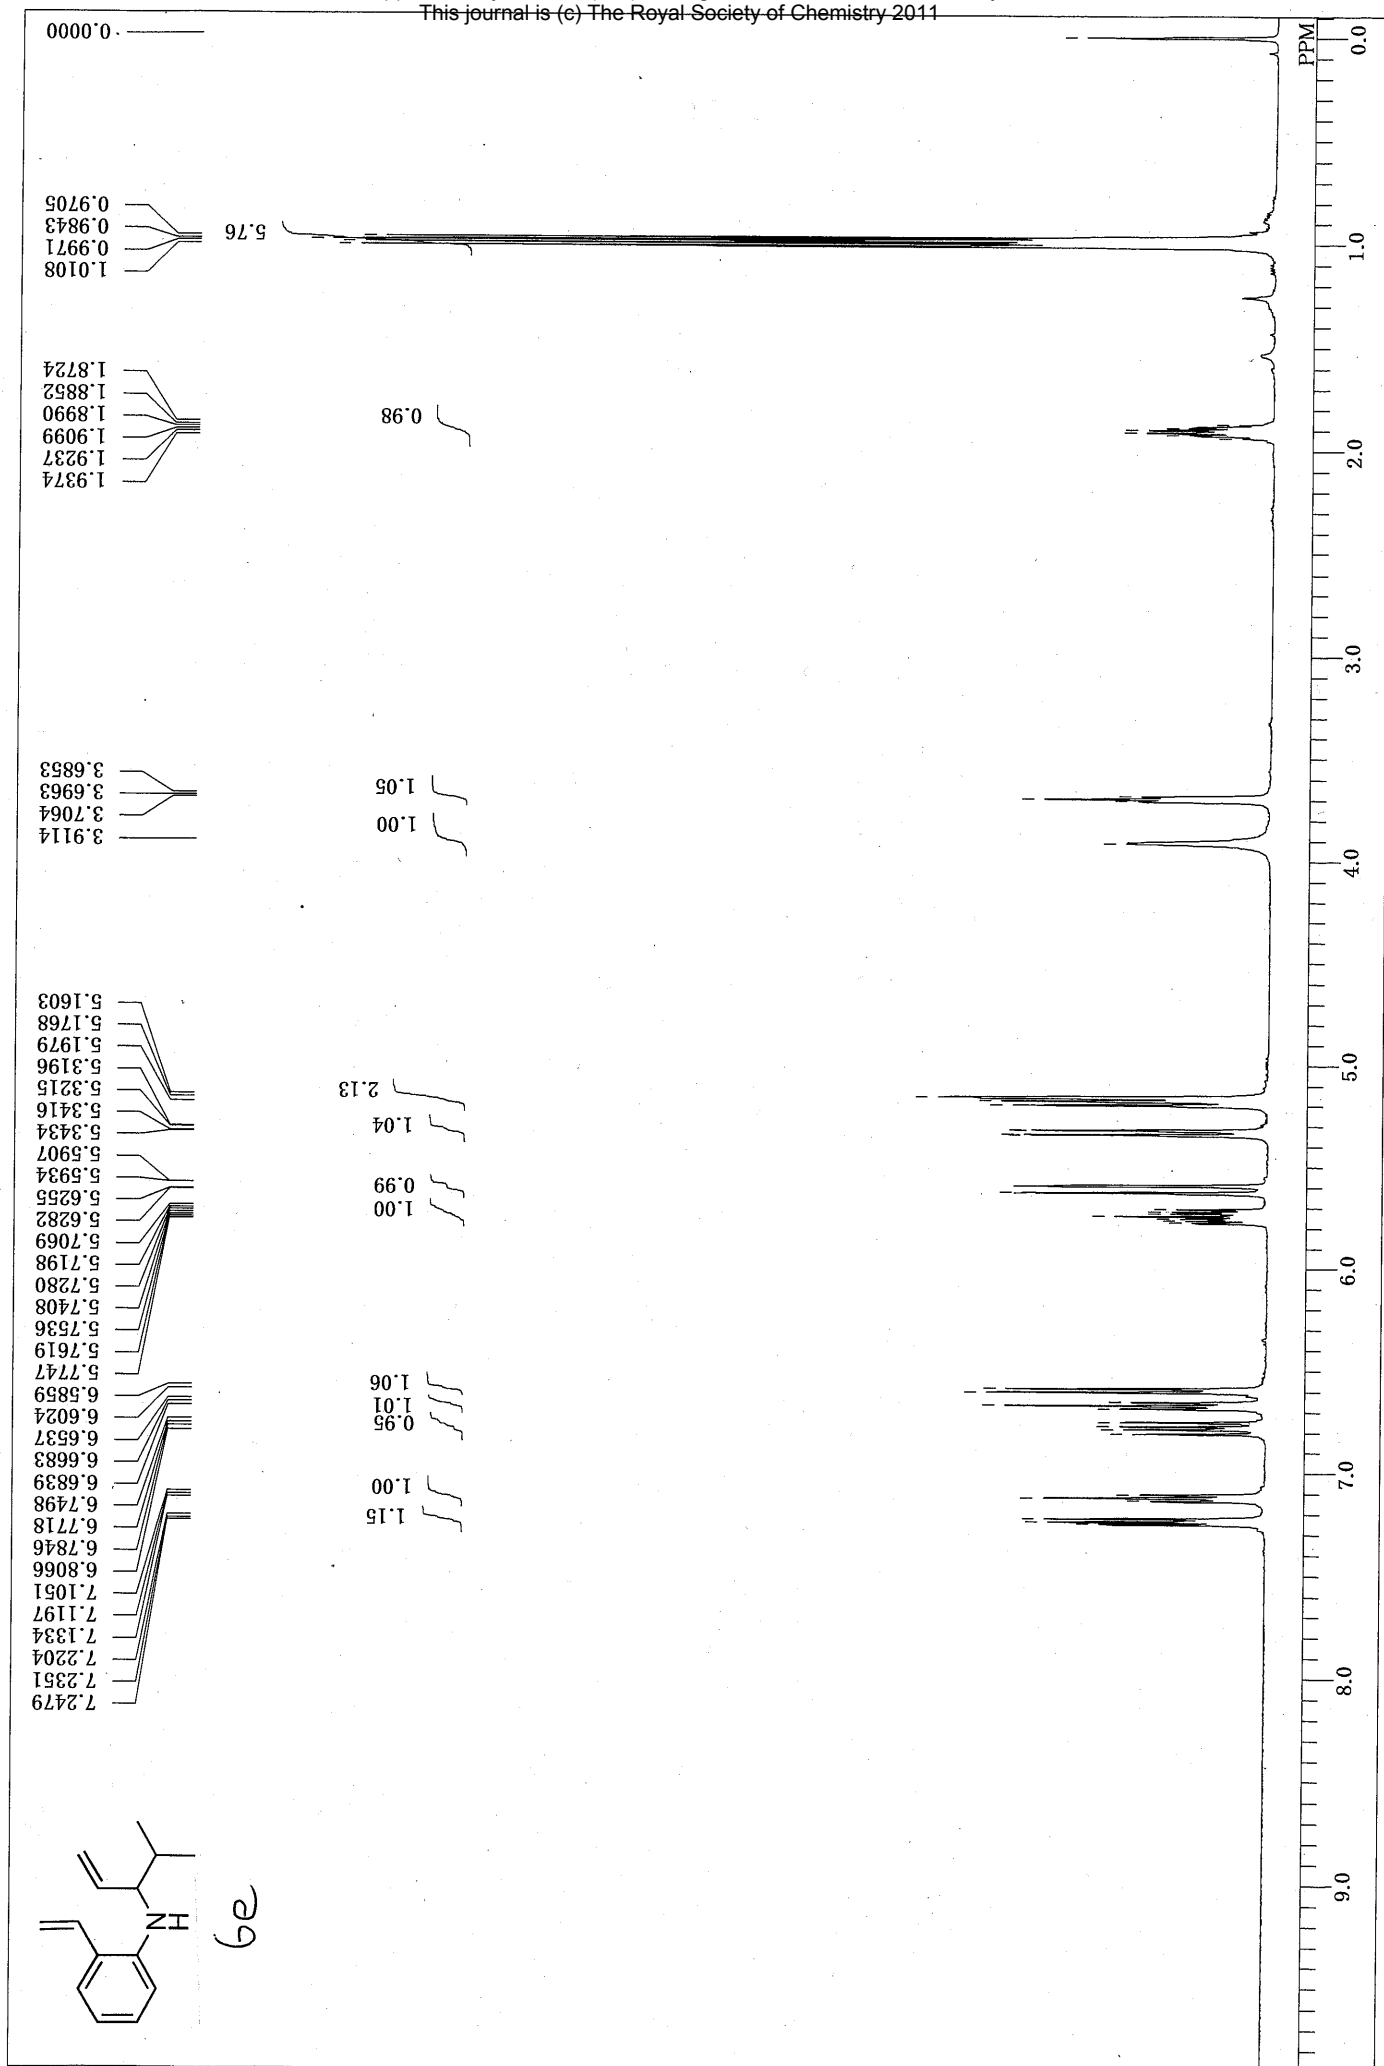

07KT3-93-2C(400, CDCl<sub>3</sub>)

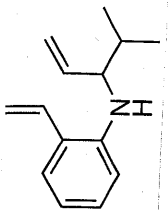

6e

18.6176  
18.7038

32.4707

61.1925

111.6233  
116.0206  
116.2218  
116.7775

124.0393  
127.5362  
128.6954  
133.0927

137.6913

144.6562

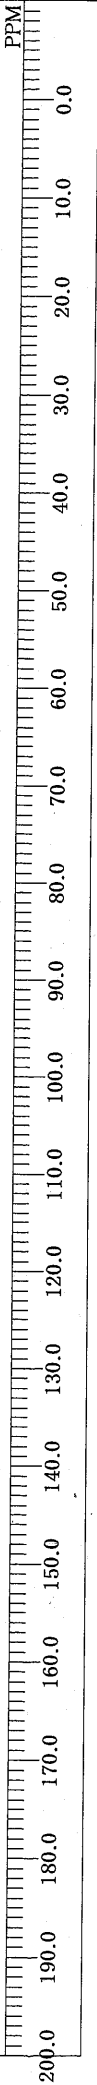

07KT4-3-2(500, CDCl3)

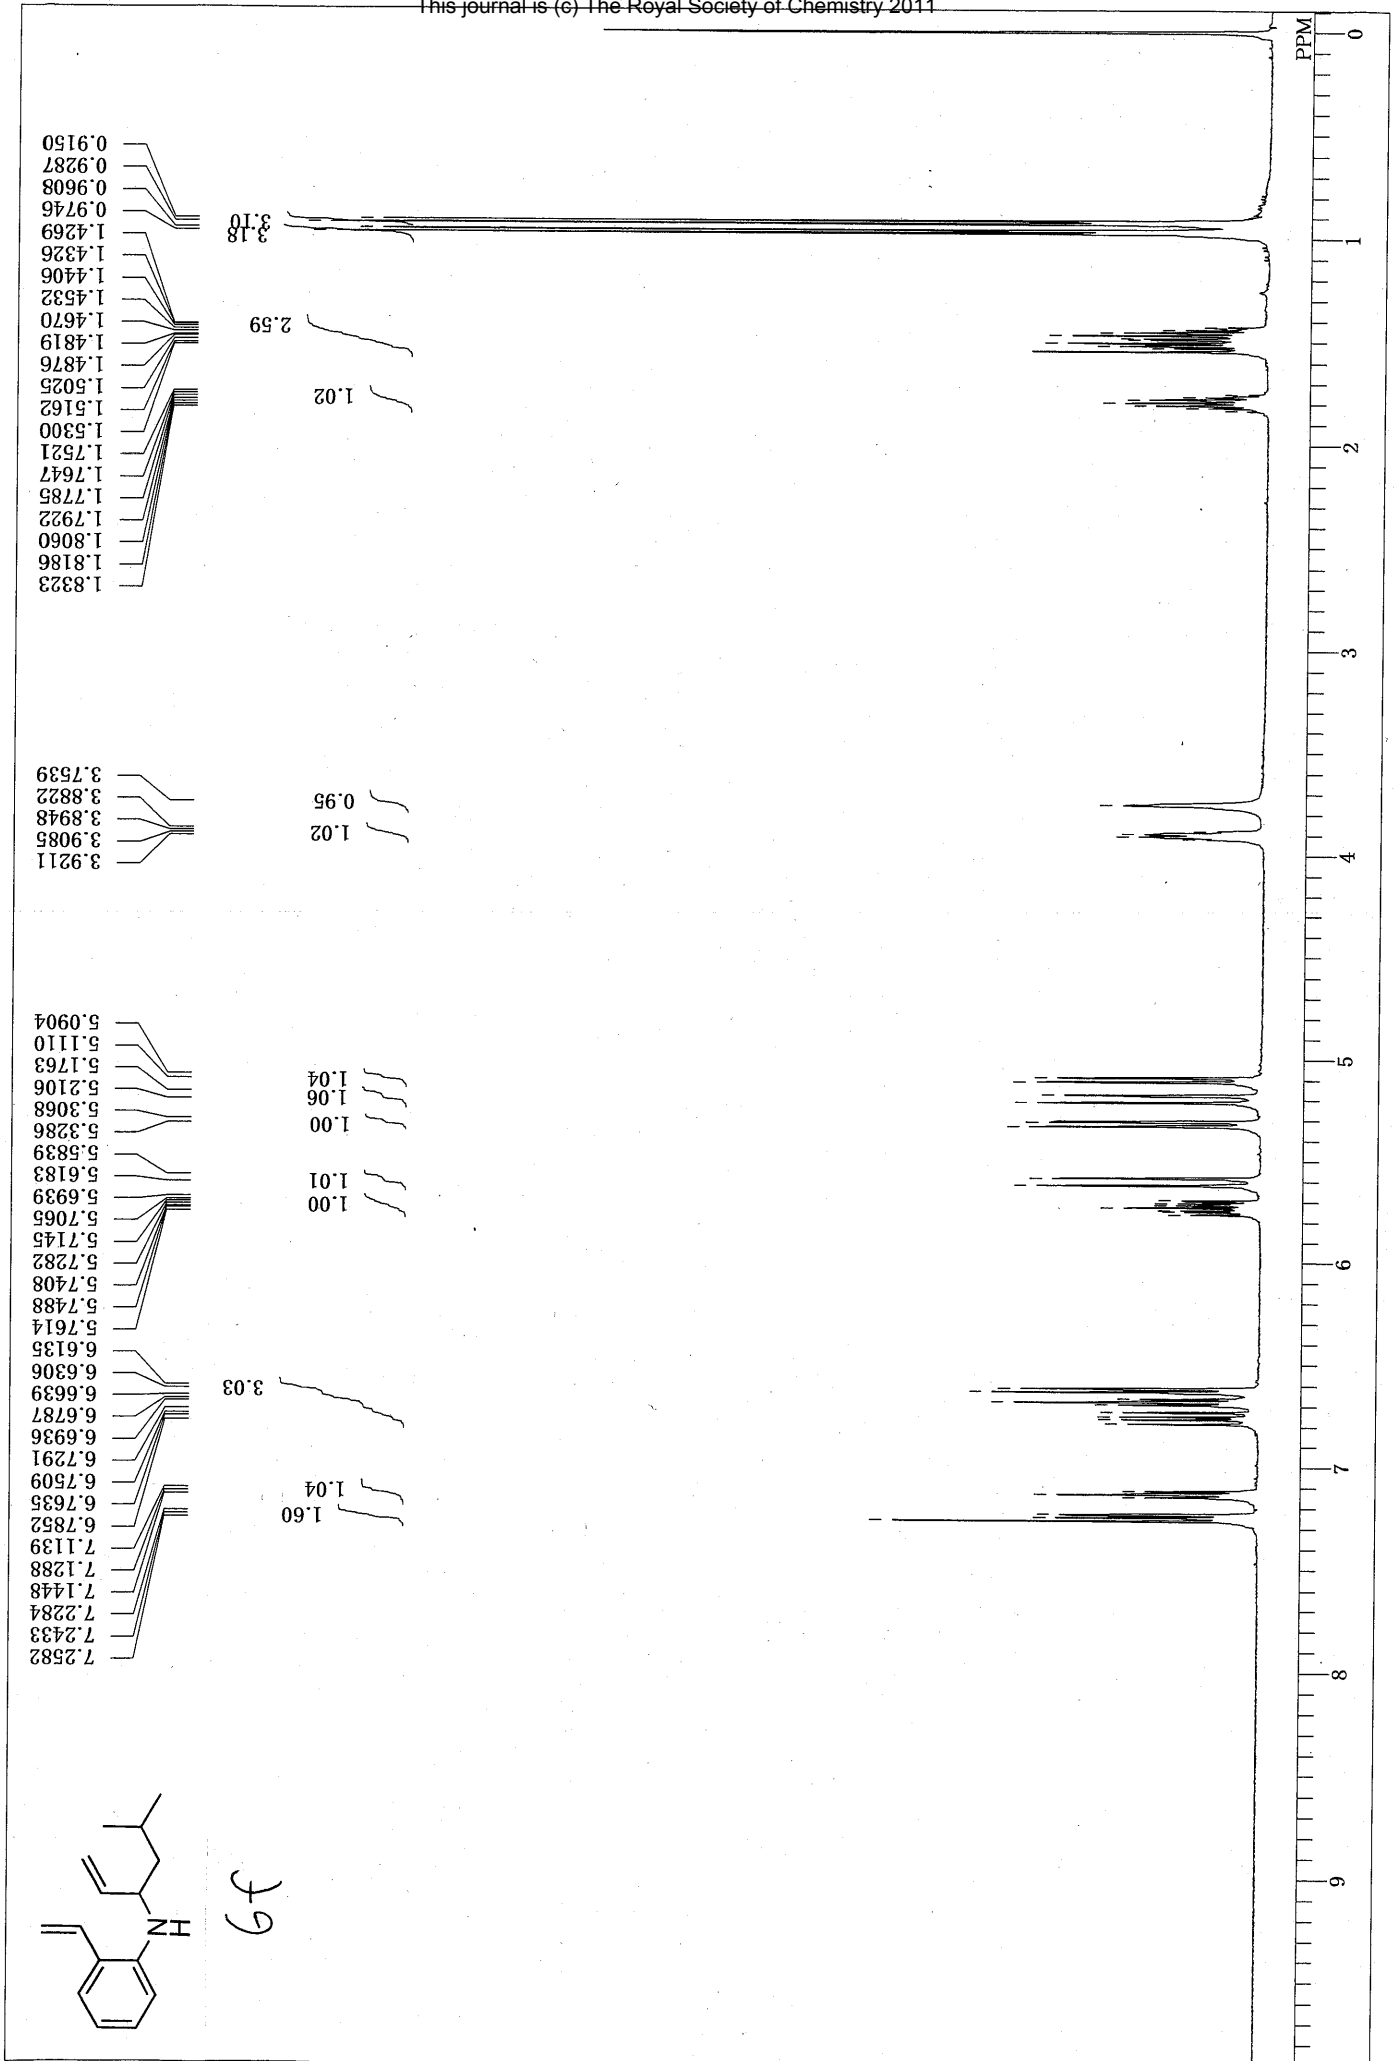

07KT4-5-2C(500, CDCl<sub>3</sub>)

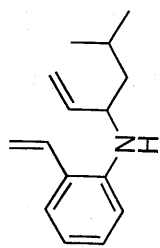

6f

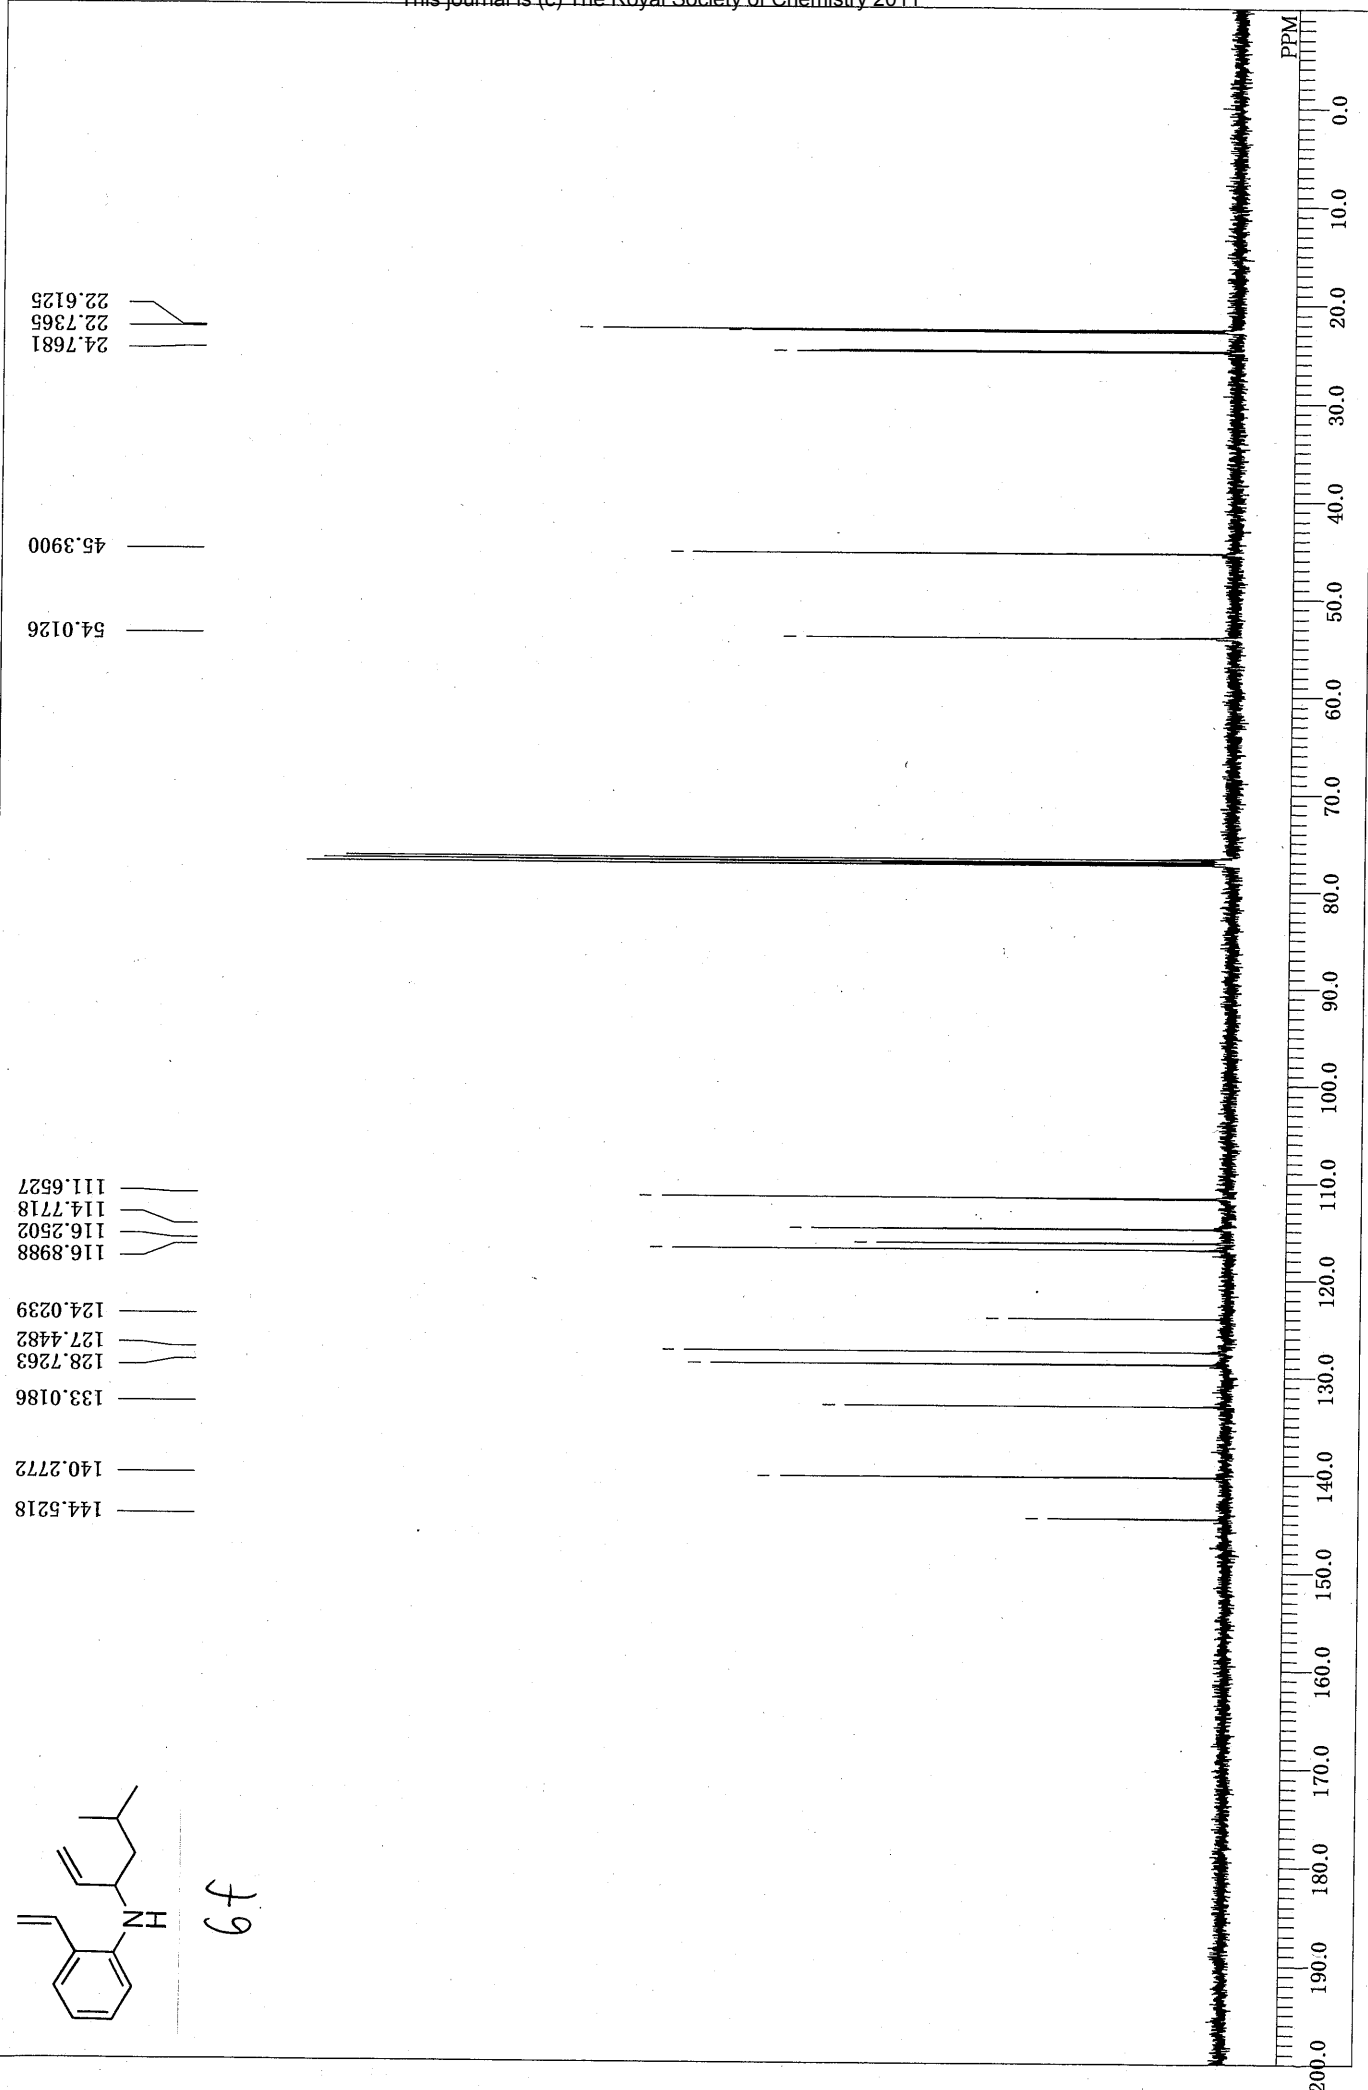



07KT2-74-2(400, CDCl3)

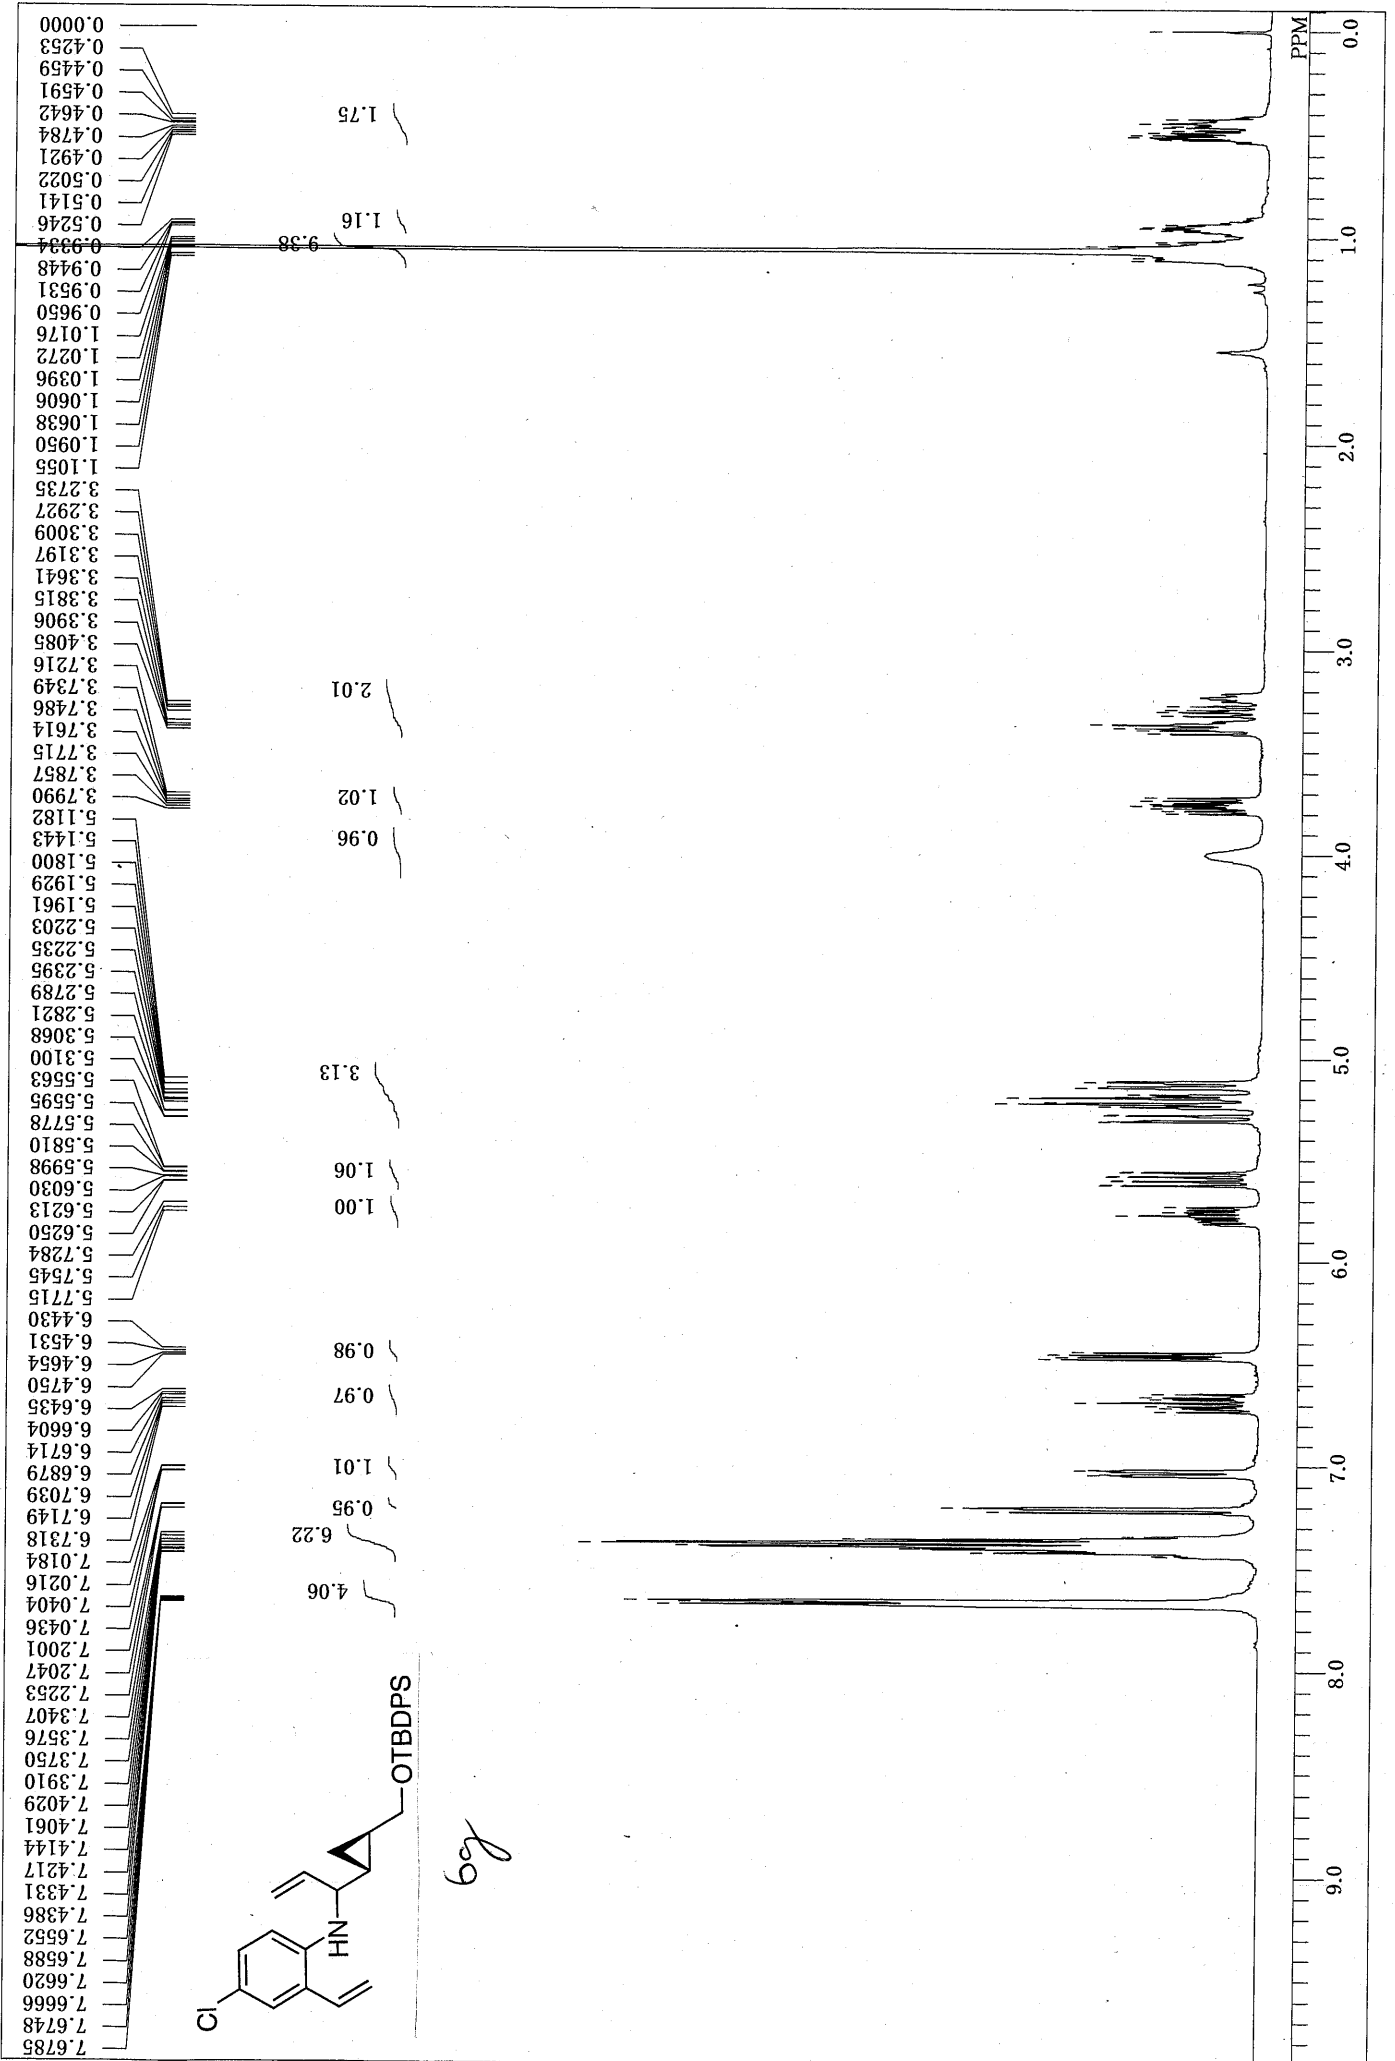

07KT2-74-2C(400, CDCl3)

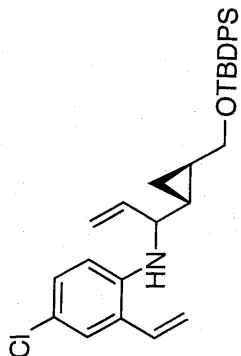

69

- 143.0850
- 138.2374
- 137.8733
- 135.5740
- 135.5549
- 133.7250
- 133.6867
- 133.6676
- 131.6653
- 131.5312
- 129.6343
- 129.6151
- 128.1876
- 128.1110
- 127.6607
- 127.6224
- 126.7697
- 126.6739
- 125.5626
- 125.4668
- 121.9604
- 121.9029
- 117.3331
- 115.6470
- 115.4266
- 113.2519
- 113.2040

- 66.7491
- 66.4808

- 59.6021
- 58.9986

- 26.9141
- 26.8566
- 22.5359
- 22.1144
- 19.4798
- 19.2211
- 19.2020
- 18.5697

- 7.8589
- 7.6673

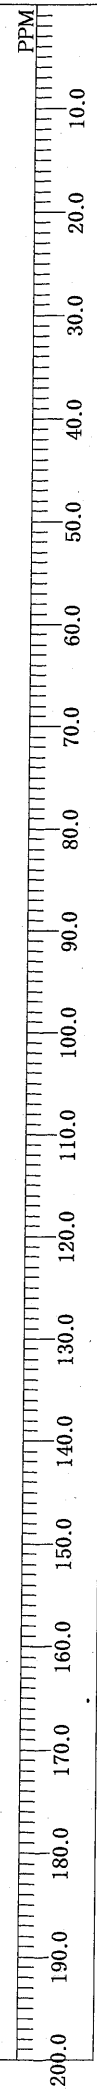

07KT4-34-2(500, CDCl3)

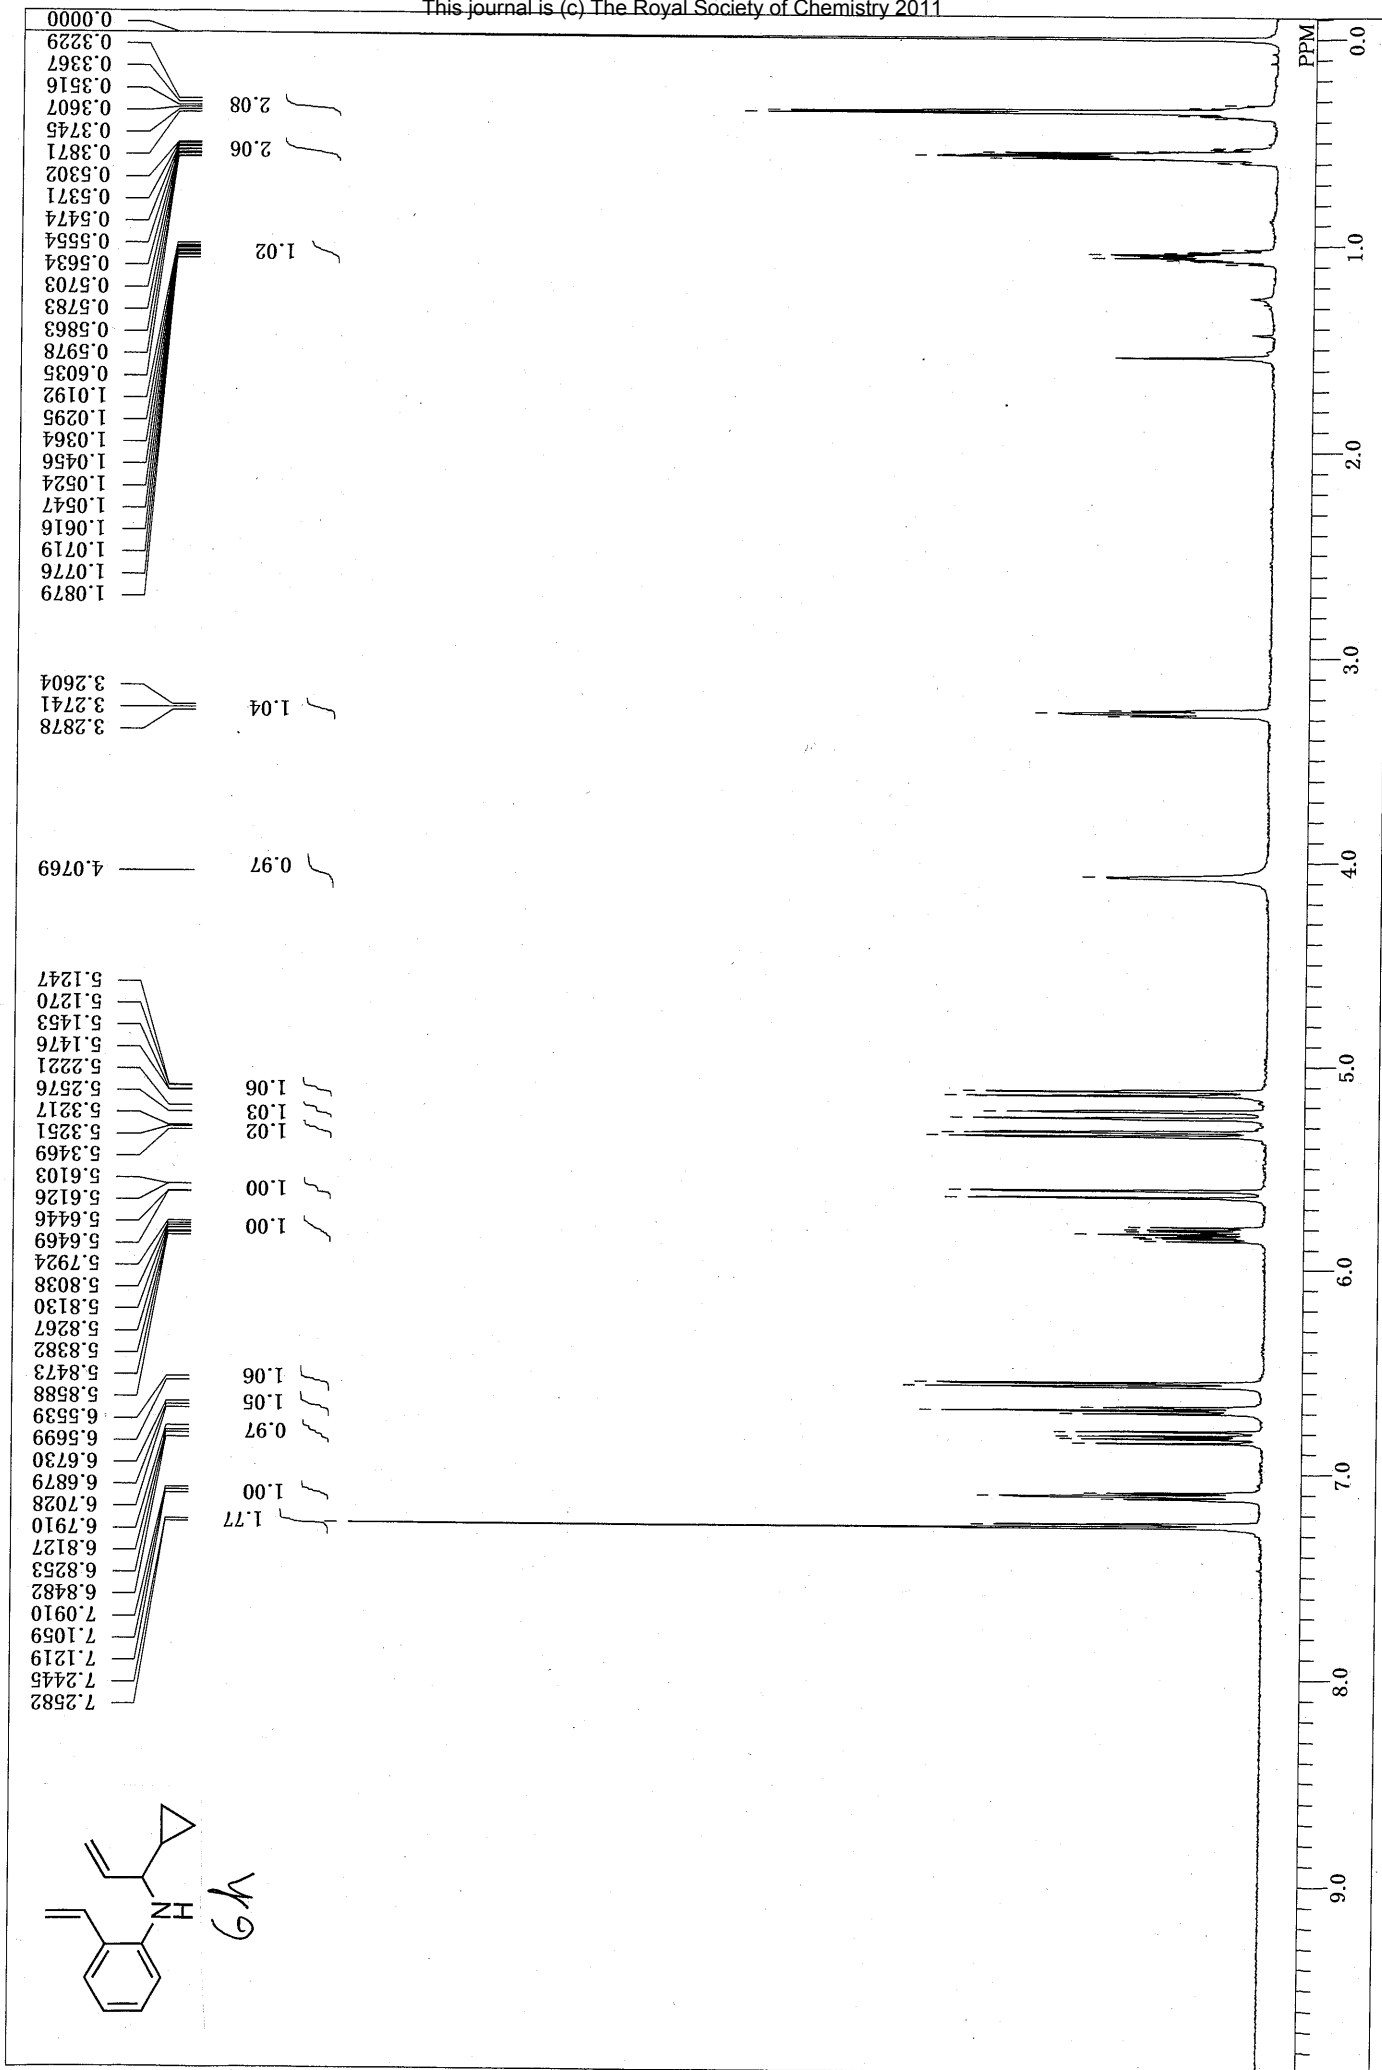

07KT4-34-2C(500, CDCl<sub>3</sub>).

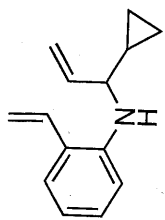

6h

| Chemical Shift (ppm) | Assignment                   |
|----------------------|------------------------------|
| 144.6458             | Aromatic C=O                 |
| 138.5603             | Aromatic C=C                 |
| 133.0090             | Aromatic C=C                 |
| 128.6405             | Aromatic C=C                 |
| 127.2956             | Aromatic C=C                 |
| 124.0812             | Aromatic C=C                 |
| 117.1087             | Aromatic C=C                 |
| 116.1453             | Aromatic C=C                 |
| 115.2296             | Aromatic C=C                 |
| 111.9484             | Aromatic C=C                 |
| 60.1076              | CH-OH                        |
| 16.7655              | CH <sub>2</sub> -Cyclopropyl |
| 3.2688               | CH <sub>2</sub> -Cyclopropyl |
| 2.5629               | CH <sub>2</sub> -Cyclopropyl |

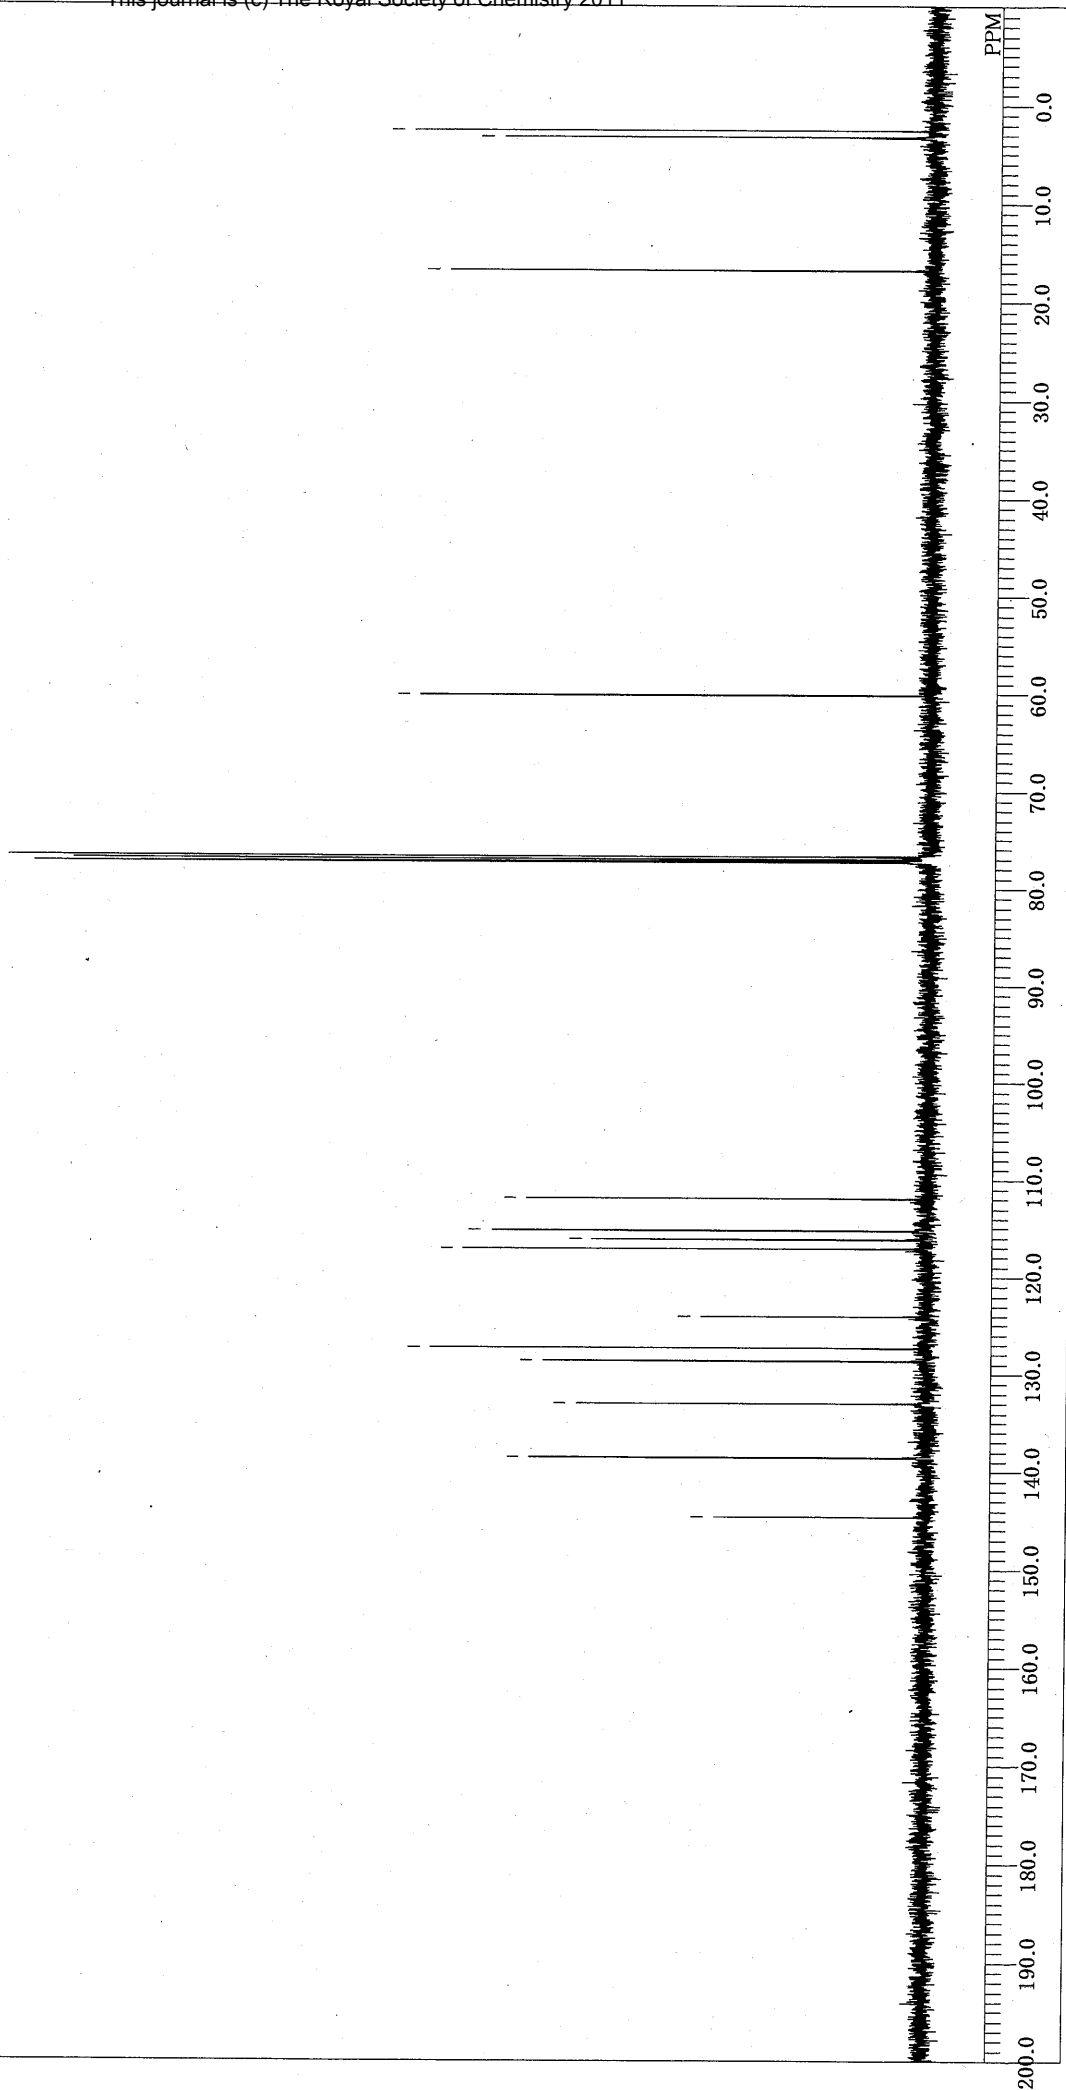

07KT5-69-1(400, CDCl3)

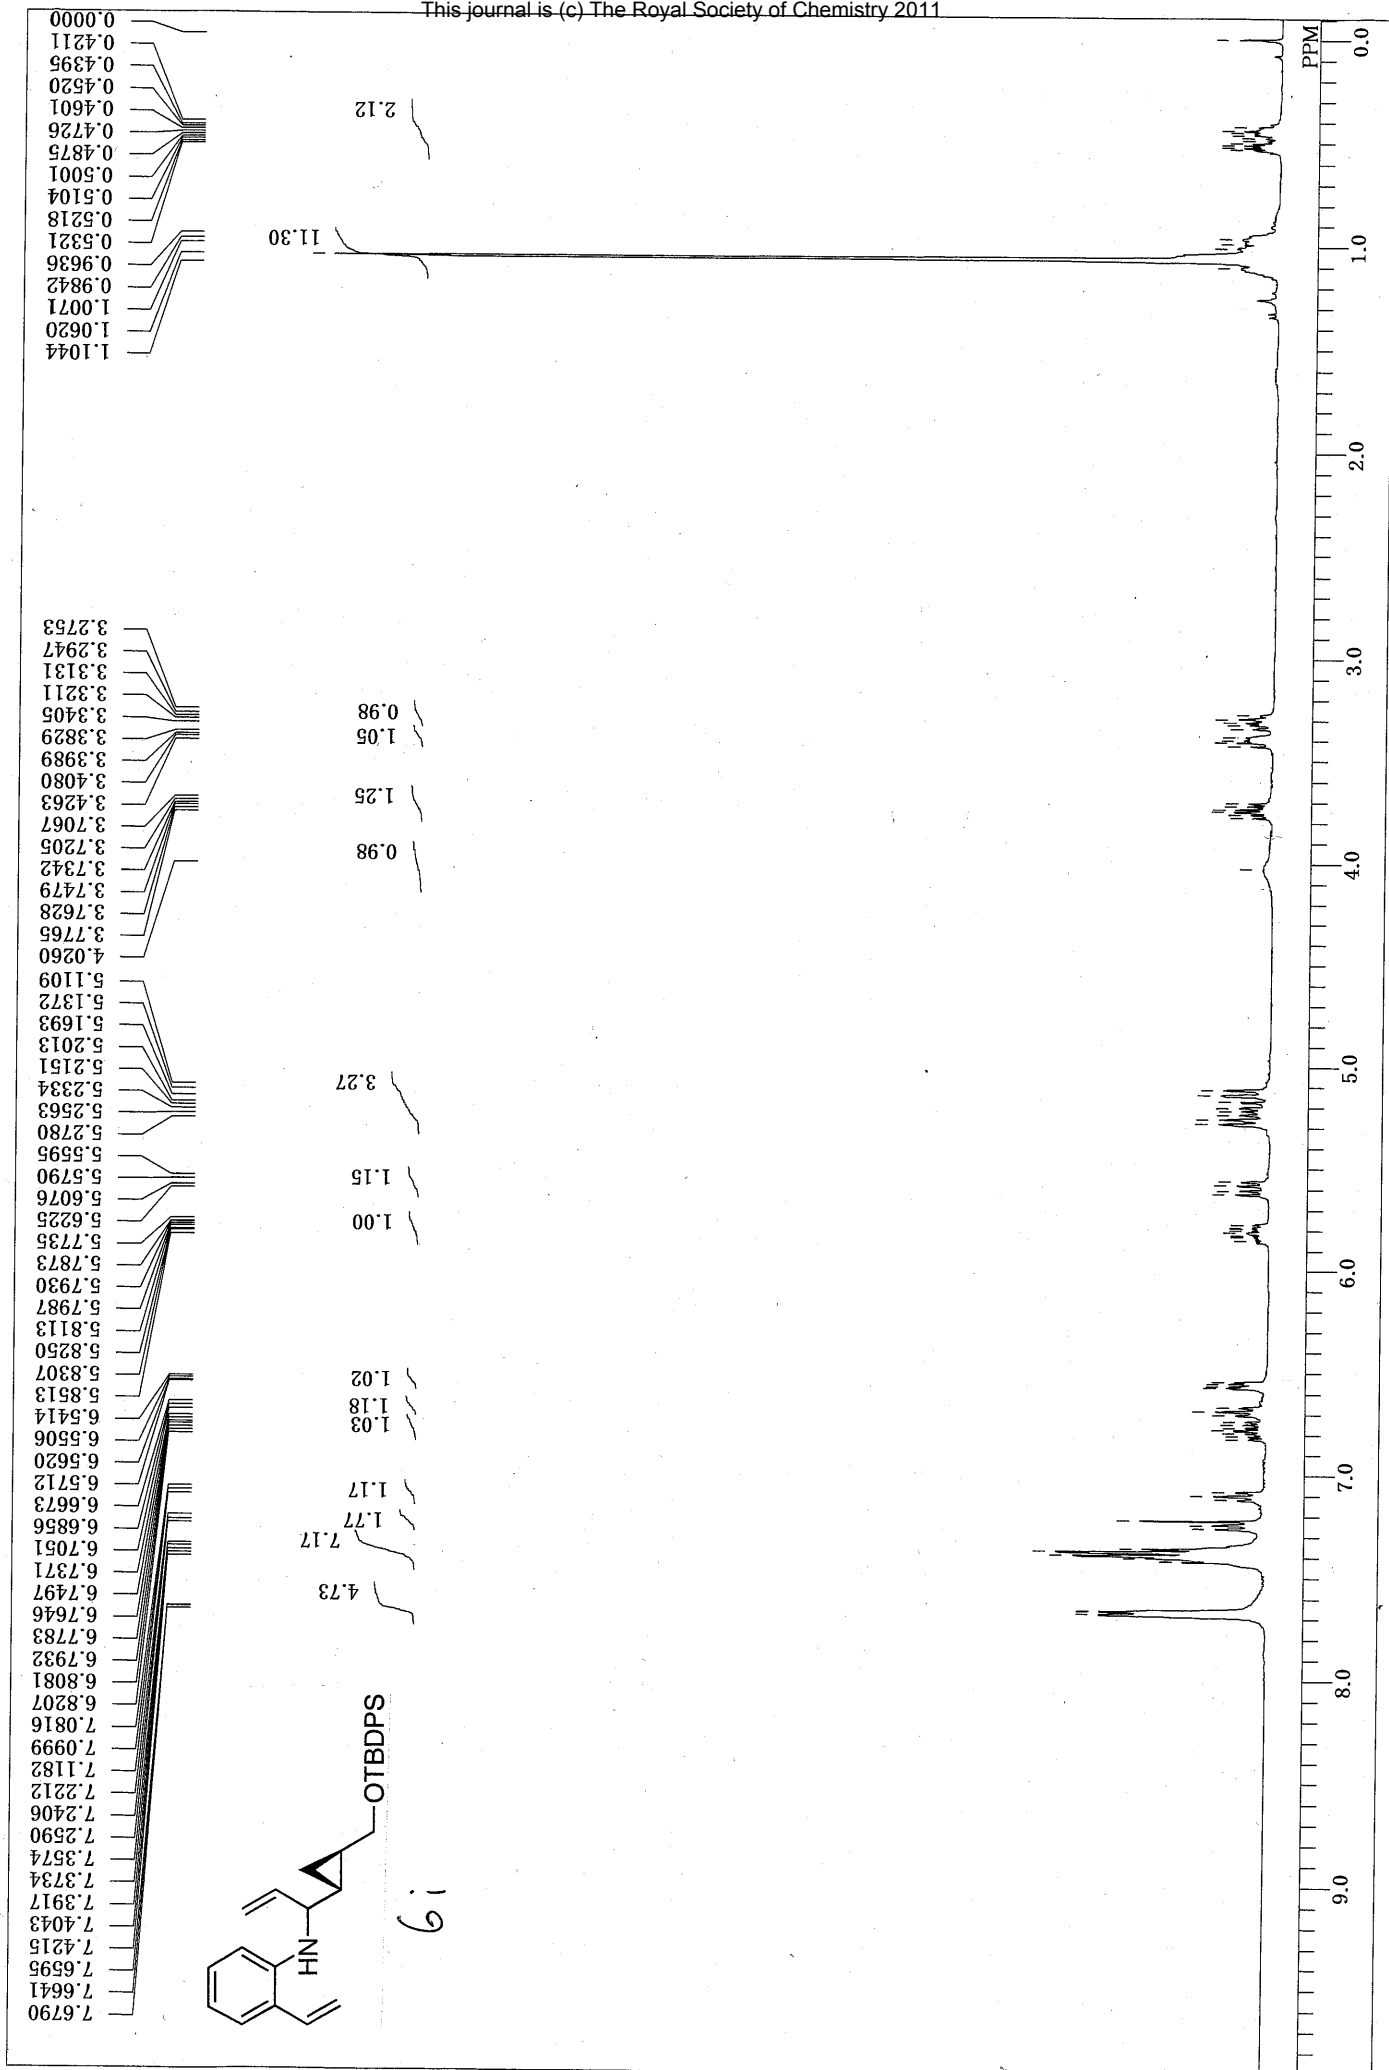

07KT5-69-1C(400,CDCl3)

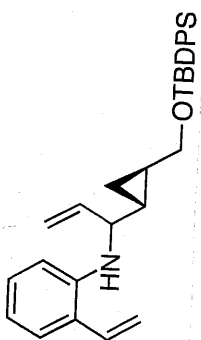

6i

|          |  |
|----------|--|
| 144.5700 |  |
| 138.6972 |  |
| 138.3907 |  |
| 135.5836 |  |
| 133.7634 |  |
| 133.7250 |  |
| 132.8532 |  |
| 132.7000 |  |
| 129.5959 |  |
| 128.6475 |  |
| 128.5804 |  |
| 127.6511 |  |
| 127.6224 |  |
| 127.2296 |  |
| 127.1242 |  |
| 124.1639 |  |
| 124.0585 |  |
| 117.1607 |  |
| 117.1224 |  |
| 116.1739 |  |
| 115.3692 |  |
| 115.2063 |  |
| 112.0256 |  |
| 111.9681 |  |
| 66.7778  |  |
| 66.5479  |  |
| 59.4297  |  |
| 58.9698  |  |
| 26.9141  |  |
| 26.8566  |  |
| 22.5742  |  |
| 22.2389  |  |
| 19.4127  |  |
| 19.2211  |  |
| 19.2115  |  |
| 18.6655  |  |
| 7.9163   |  |
| 7.6577   |  |

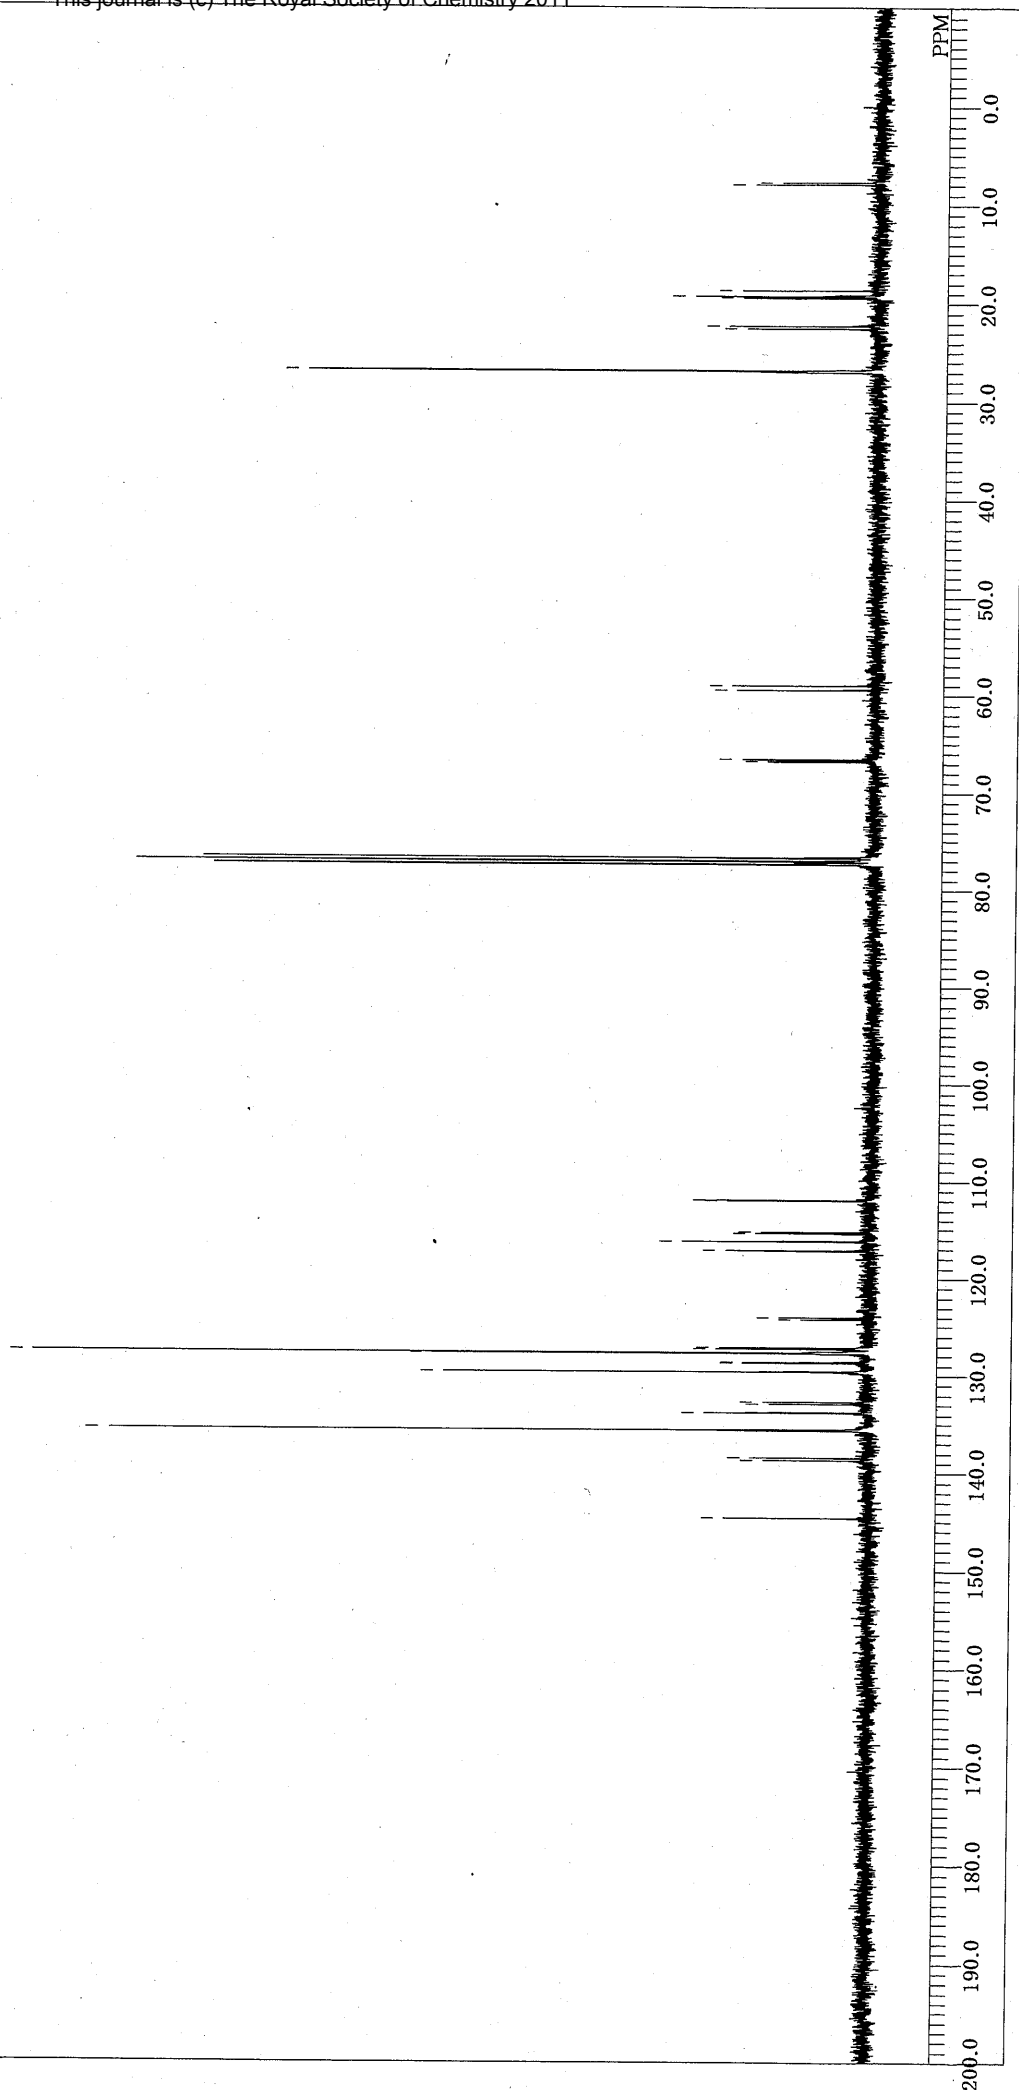

07KT5-90-1(400, CDCl3)

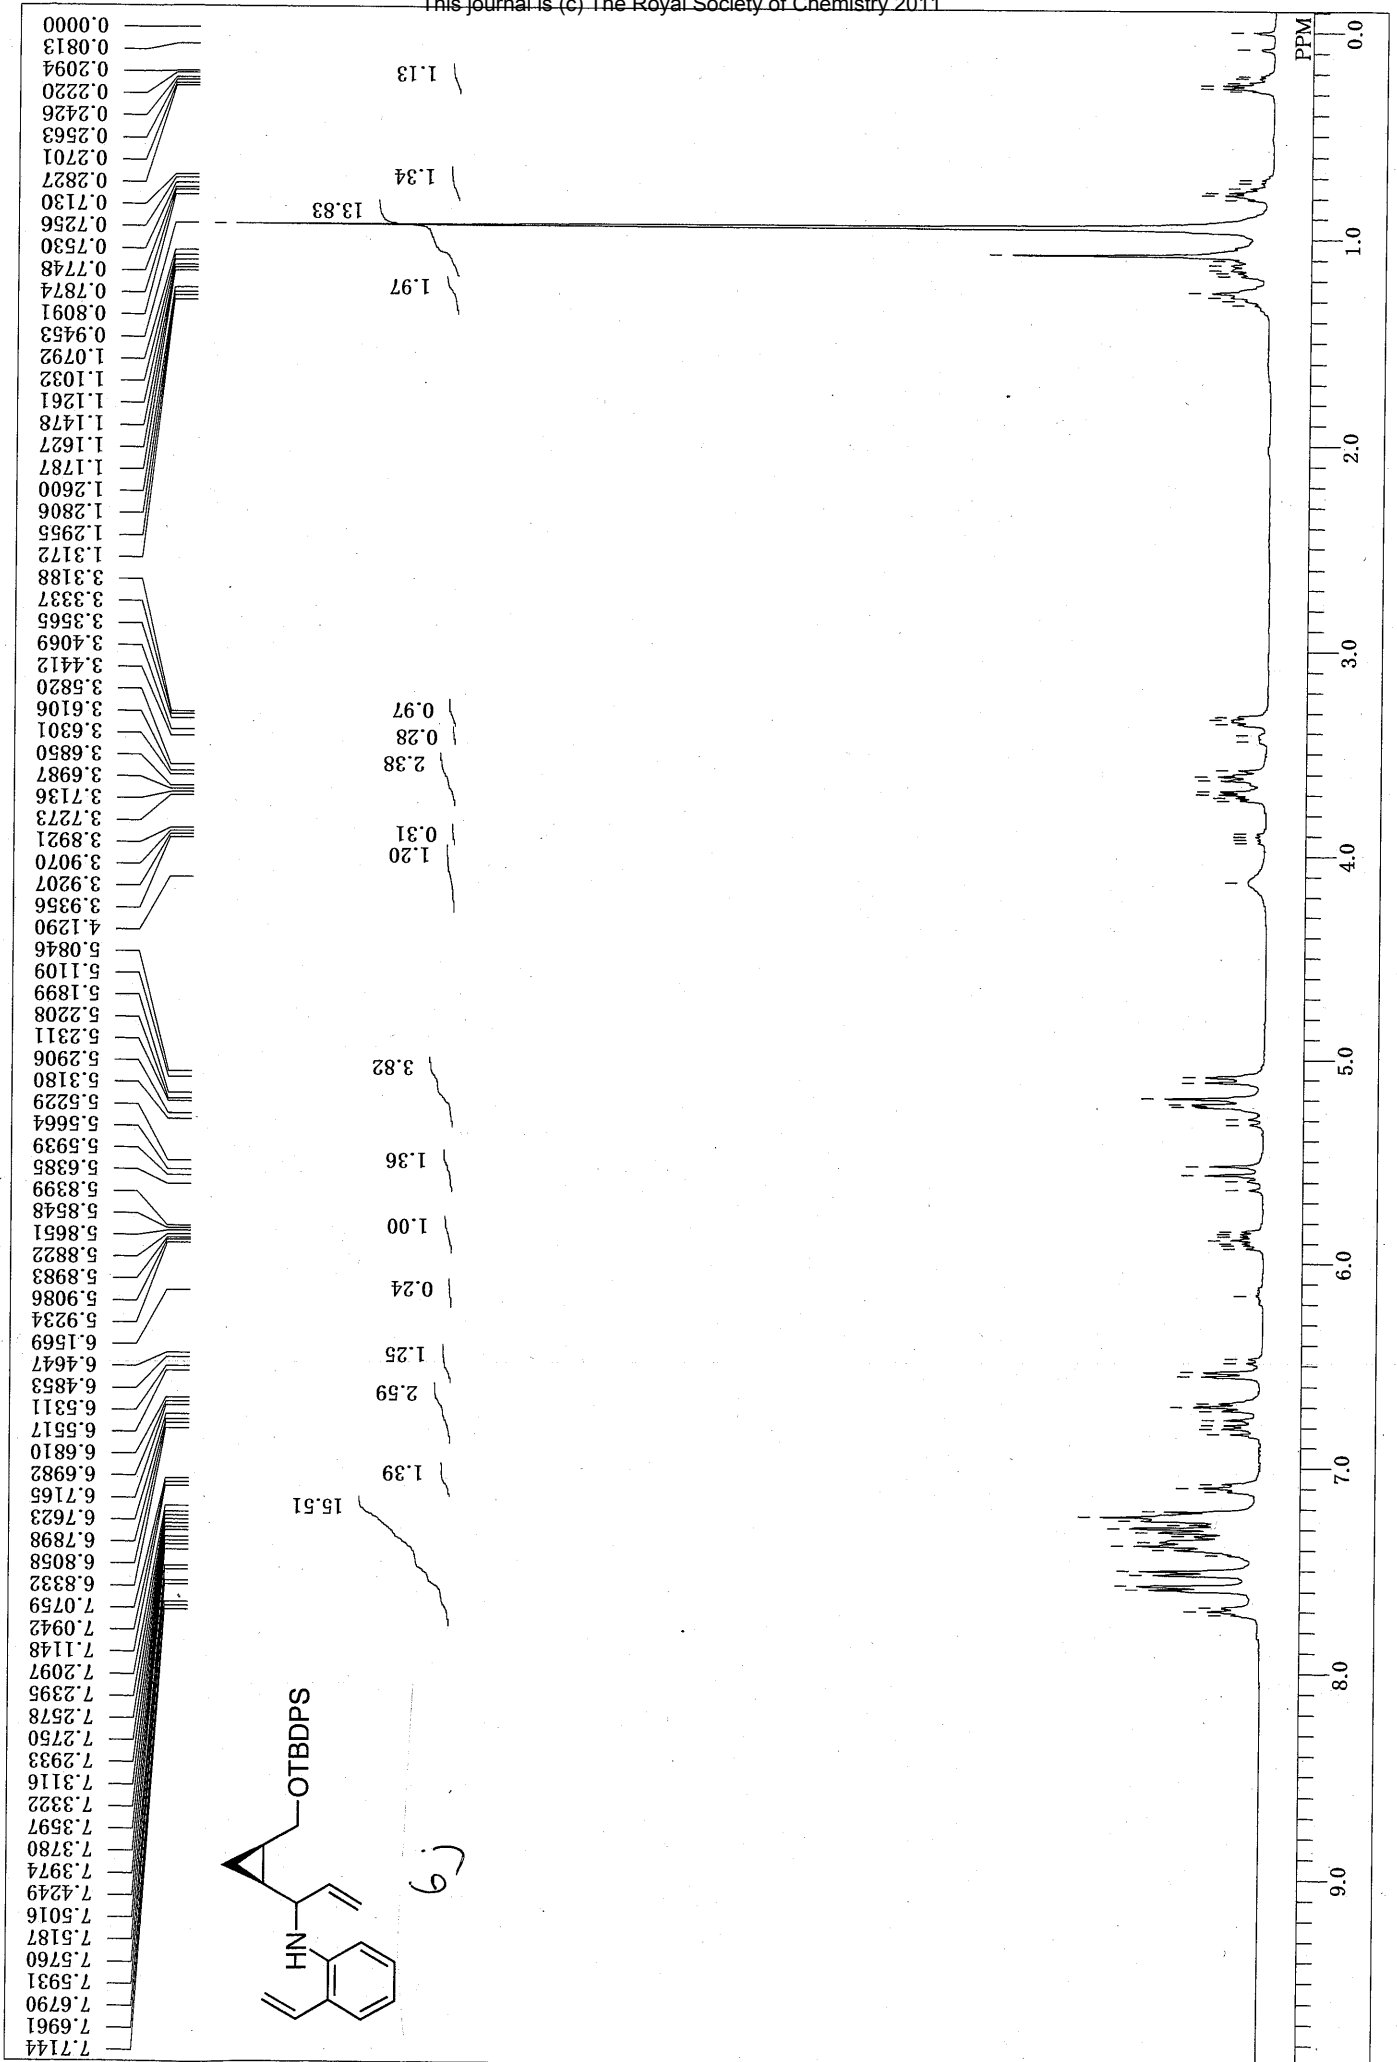

07KT5-88-1C(500, CDCl<sub>3</sub>)

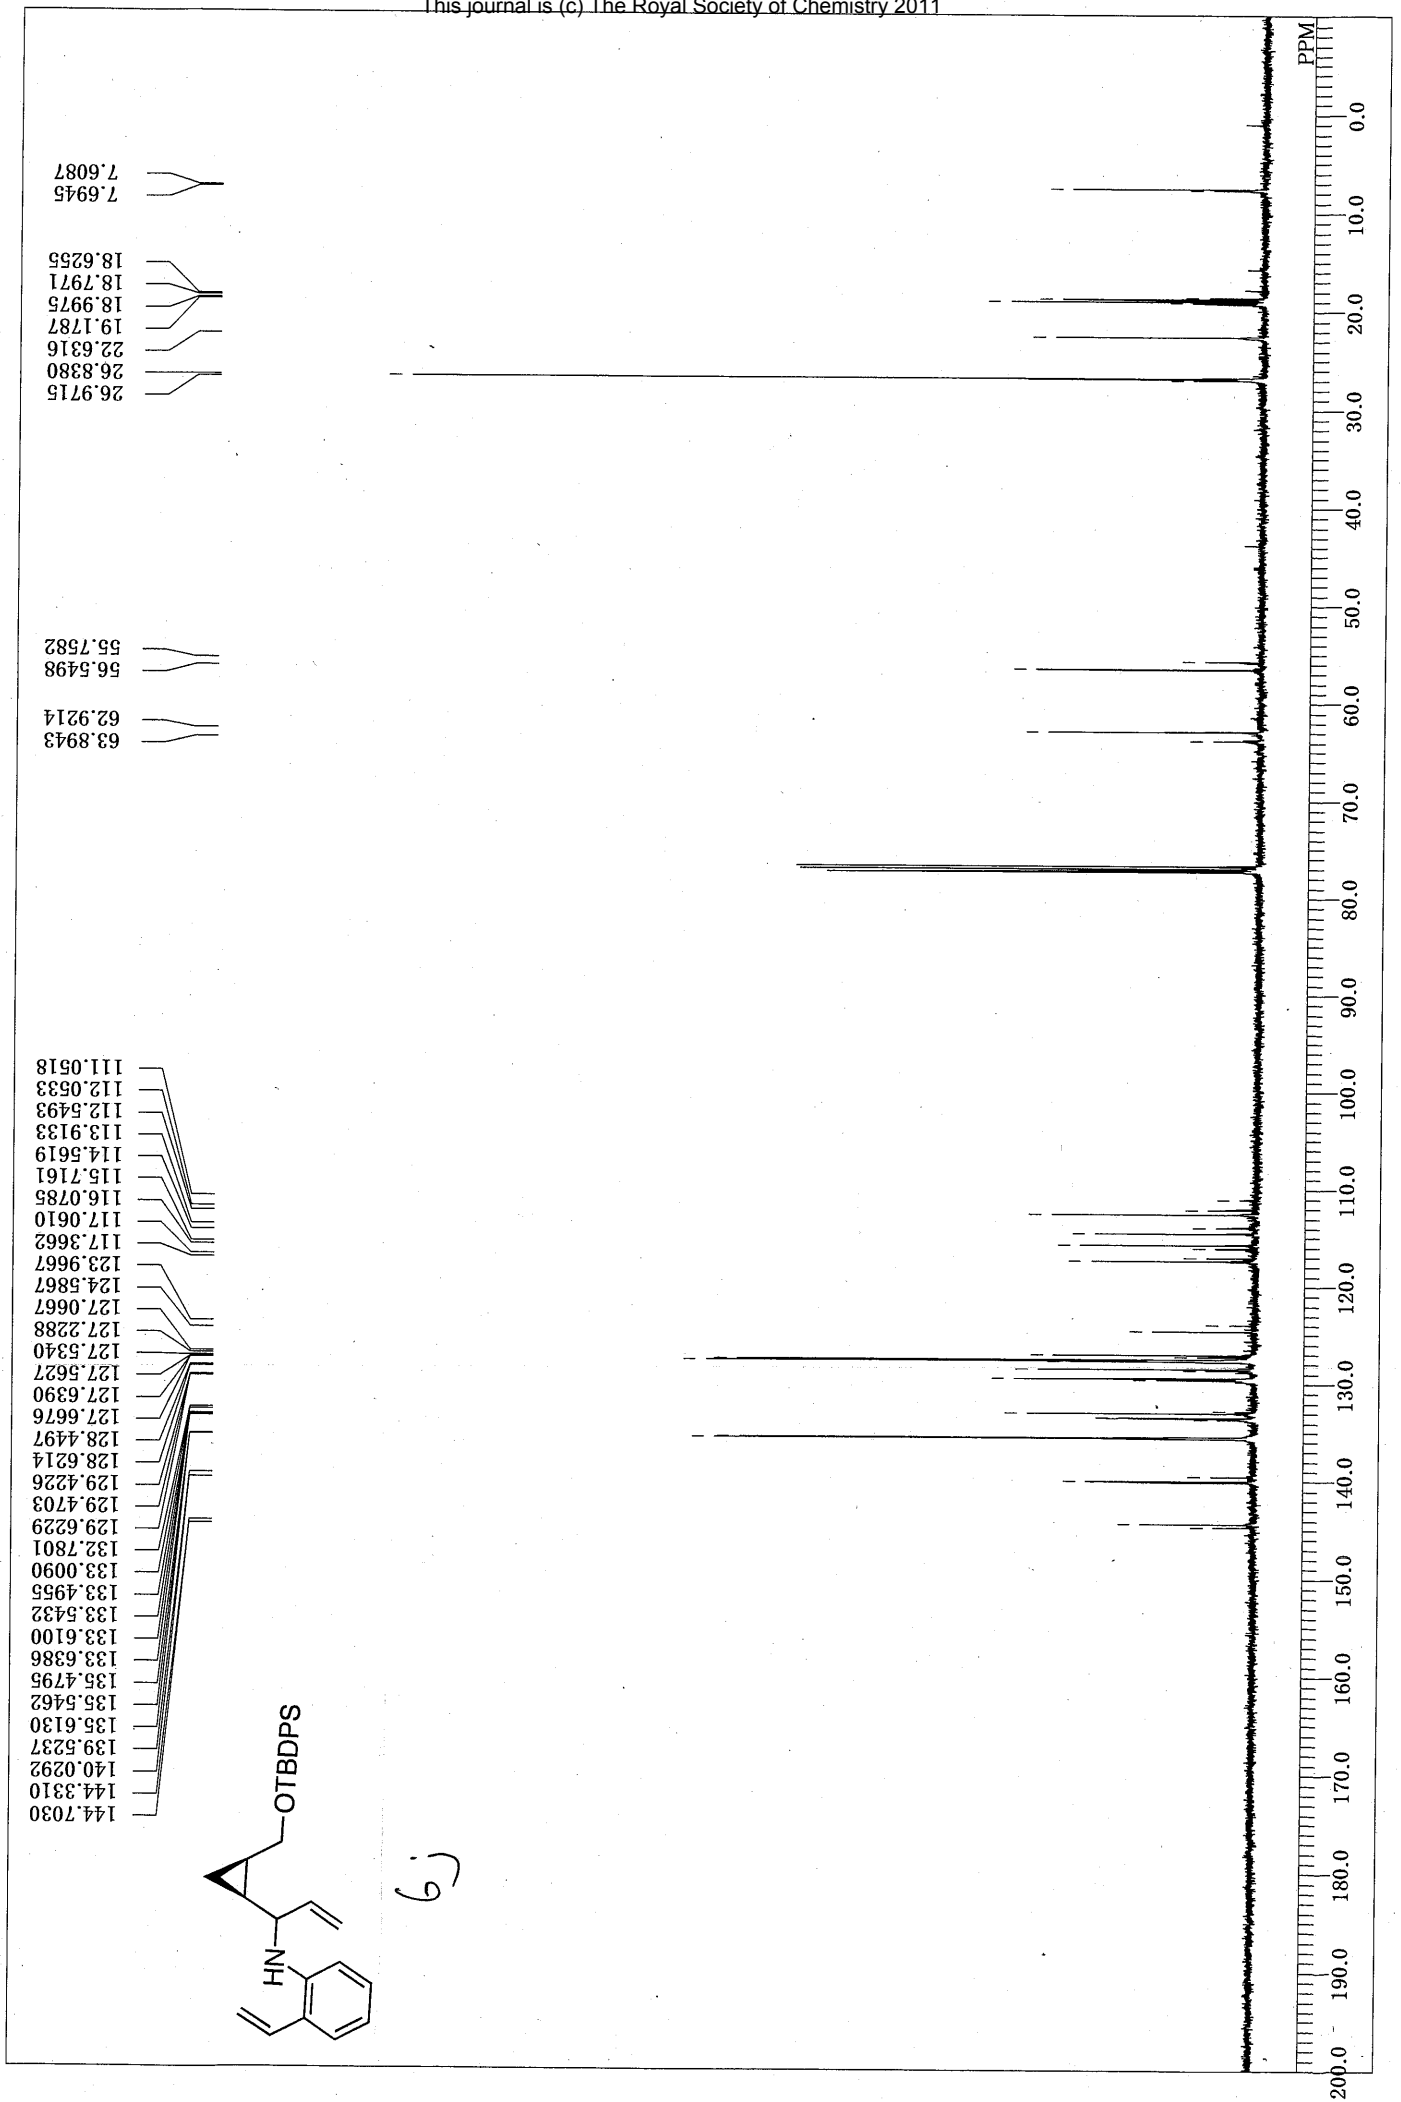



07KT3-20-1(500, CDCl3)

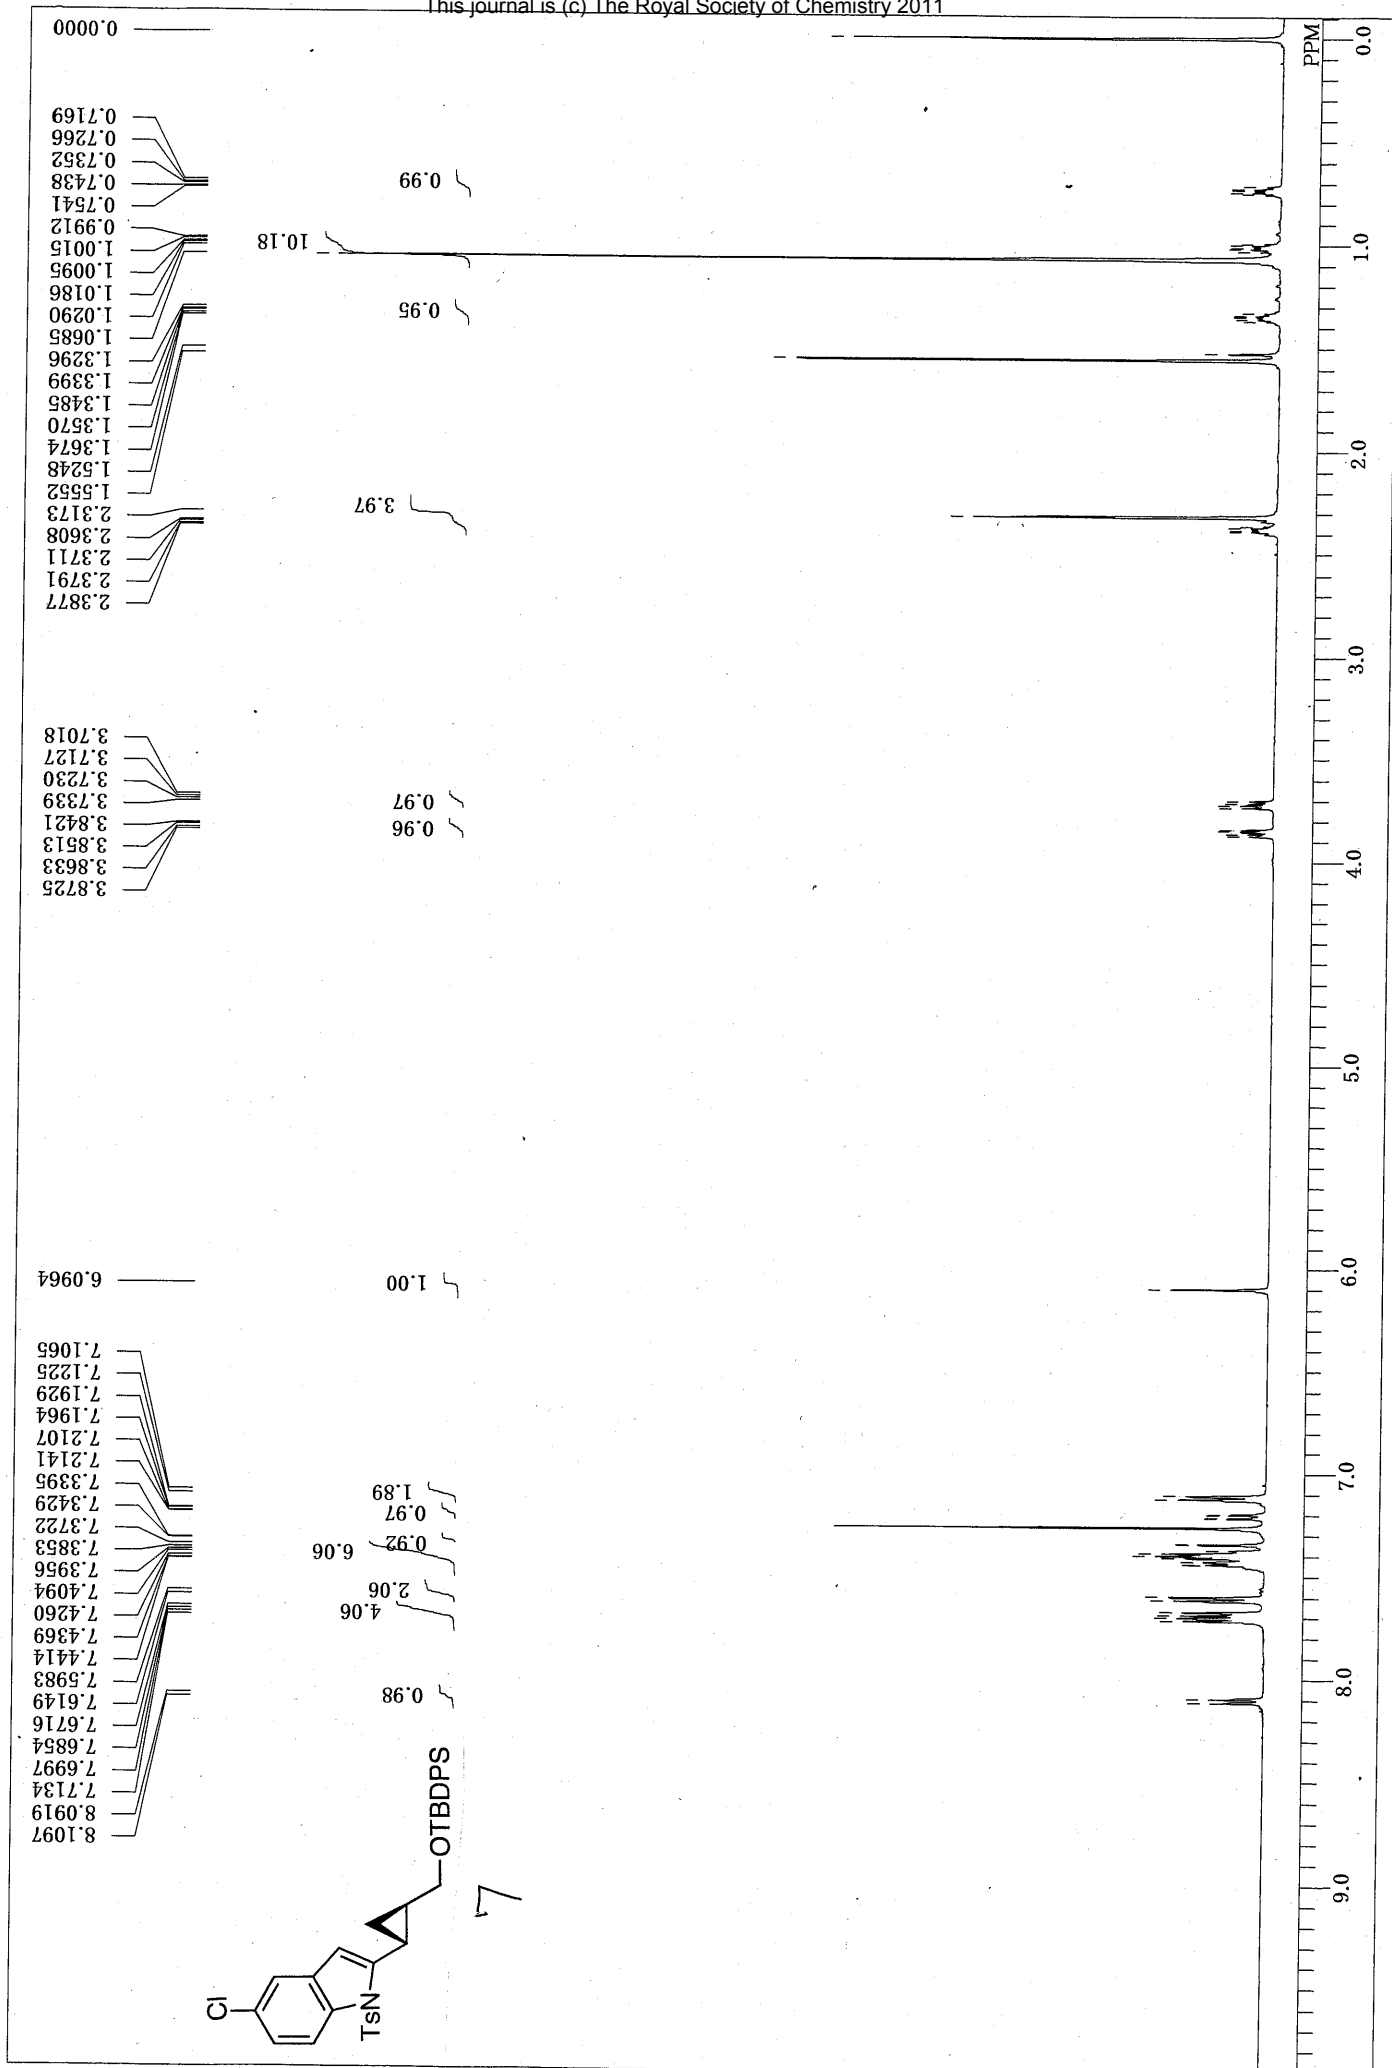

07KT3-20-1 C(500, CDCl<sub>3</sub>)

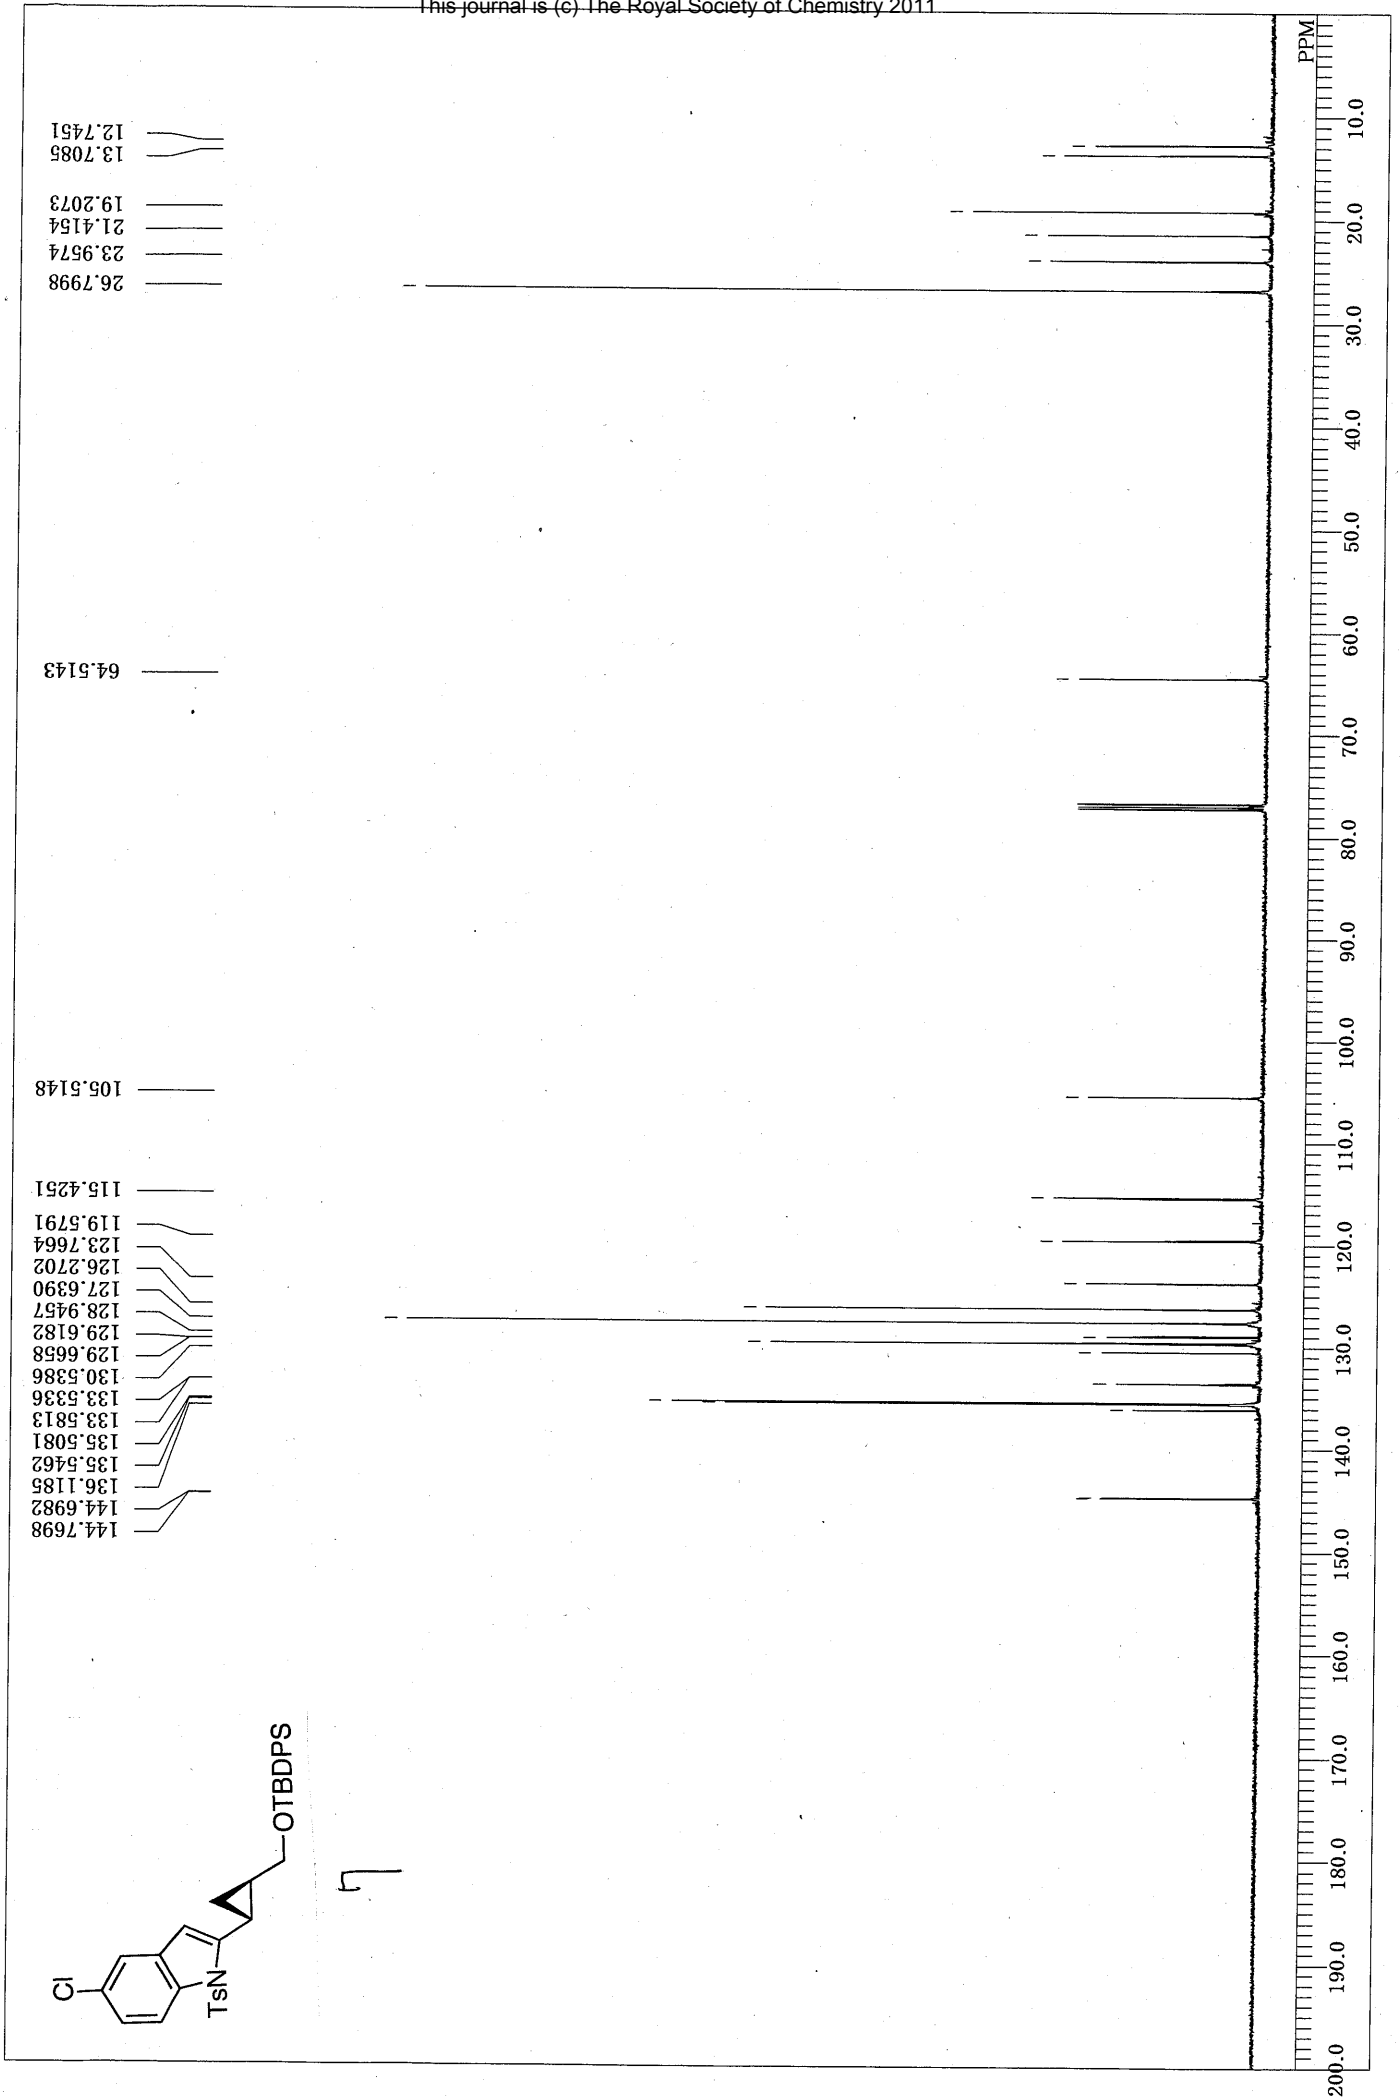

07KT3-23-1(500, CDCl3)

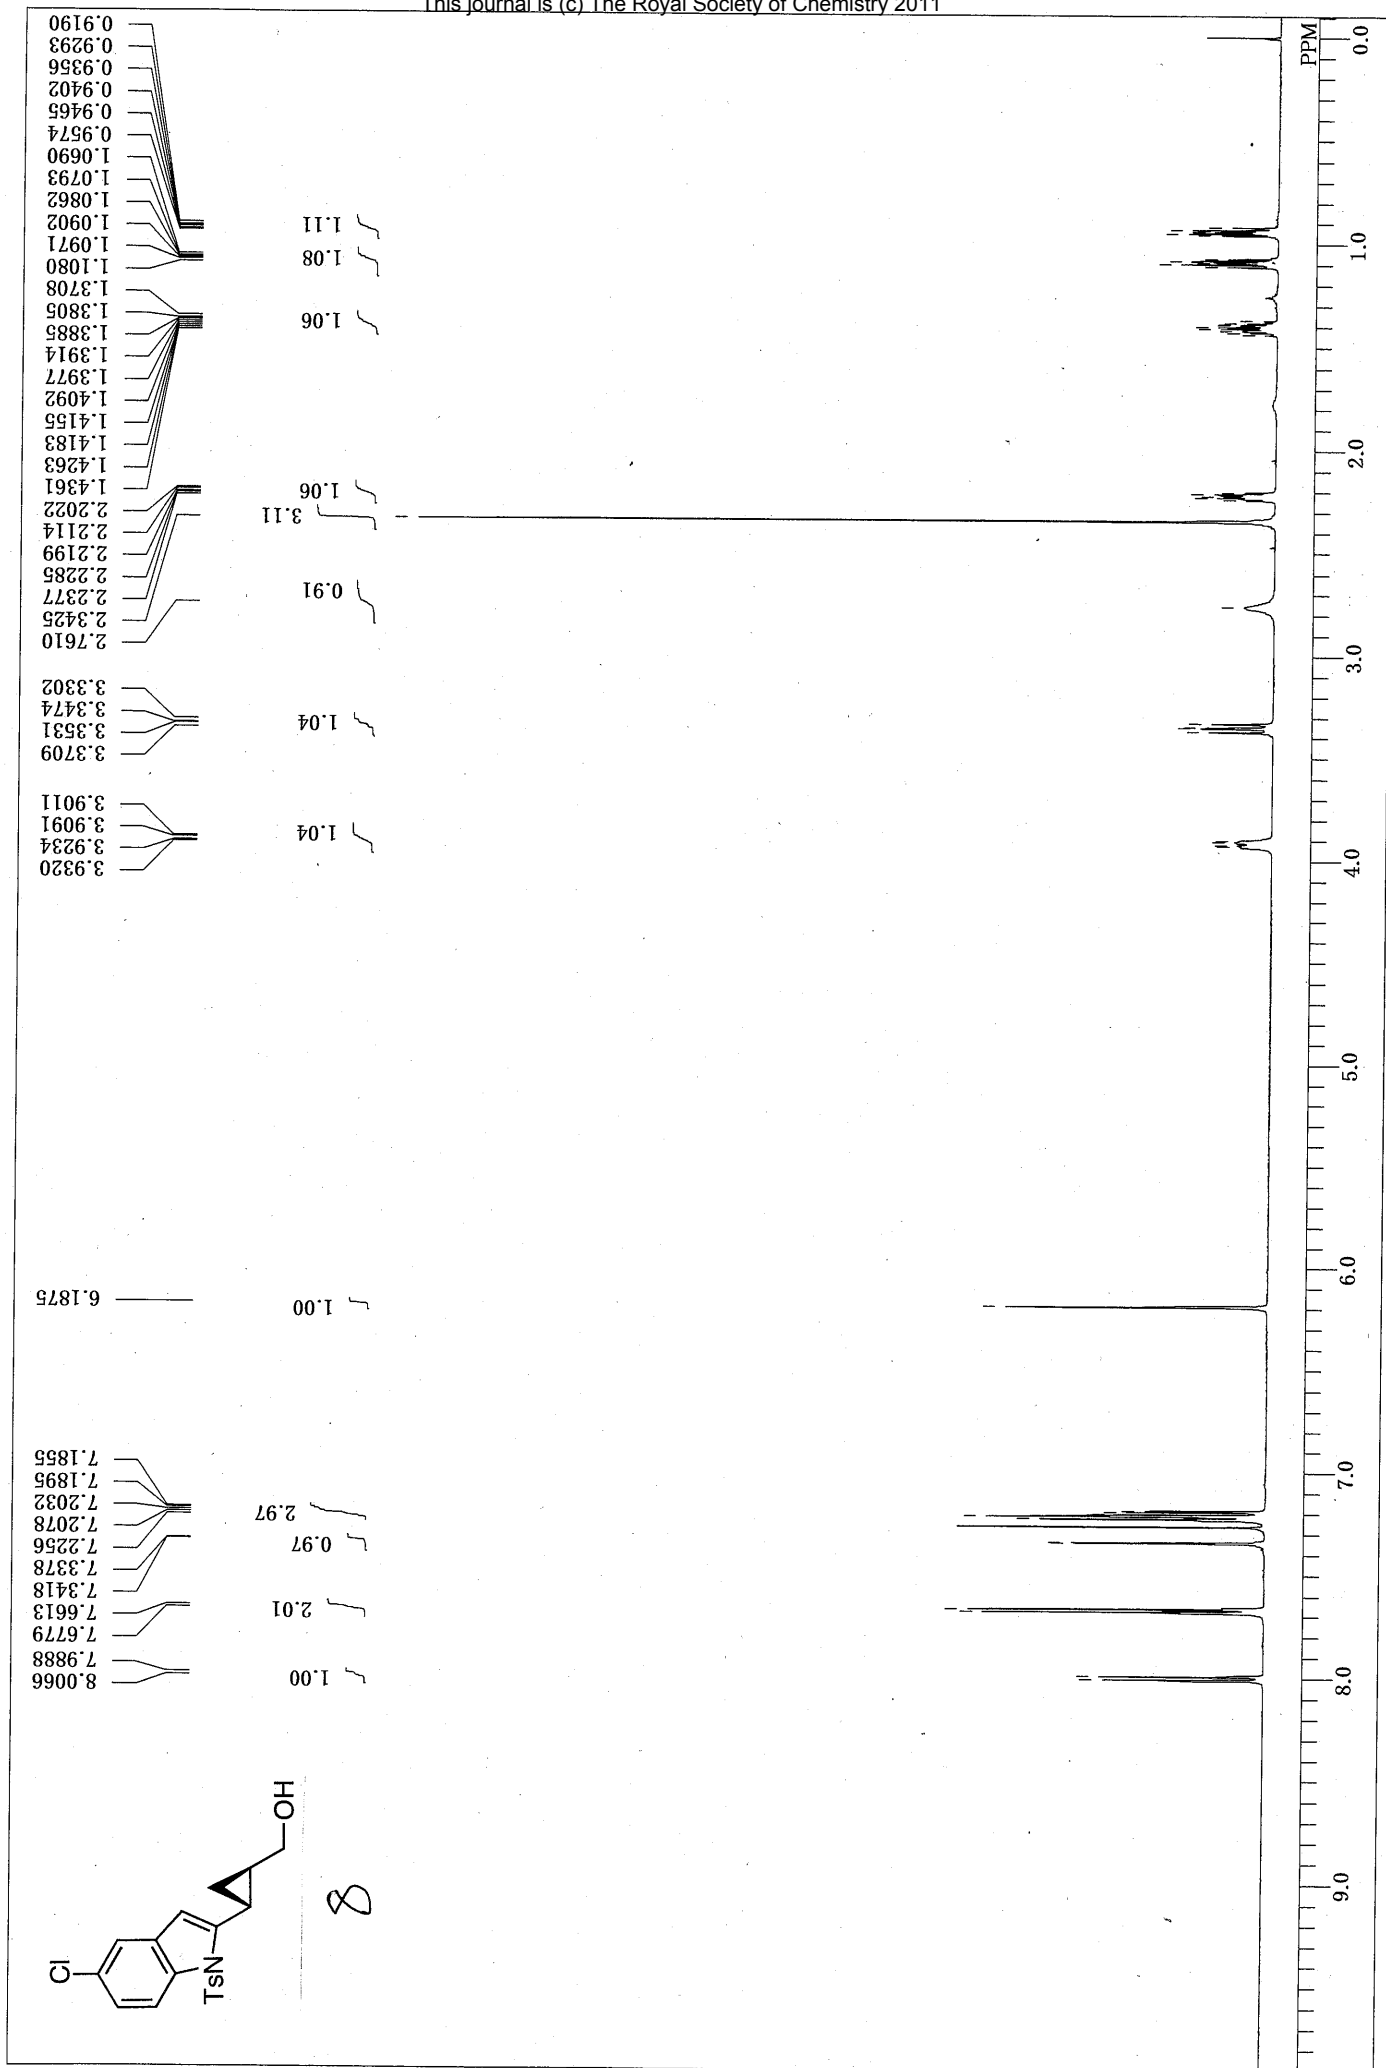

07KT3-23-1C(500,CDCl3)

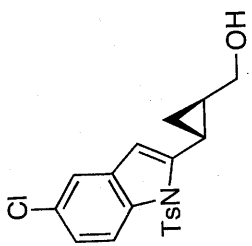

8

| Chemical Shift (ppm) |
|----------------------|
| 145.1752             |
| 143.8446             |
| 135.6130             |
| 135.3555             |
| 130.4957             |
| 129.9377             |
| 129.2748             |
| 126.3179             |
| 124.2099             |
| 119.9034             |
| 115.4251             |
| 106.7262             |
| 66.3505              |
| 25.3595              |
| 21.5346              |
| 16.3983              |
| 10.5751              |

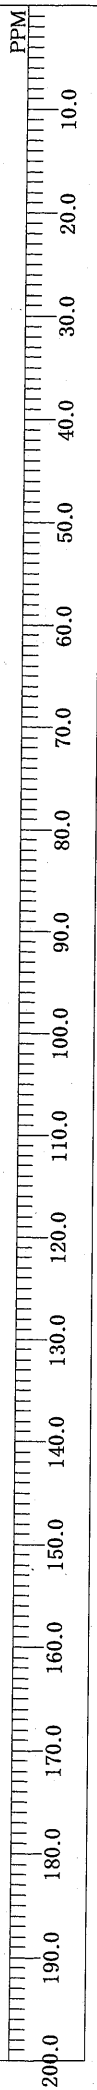

07KT3-25-1(400, CDCl<sub>3</sub>)

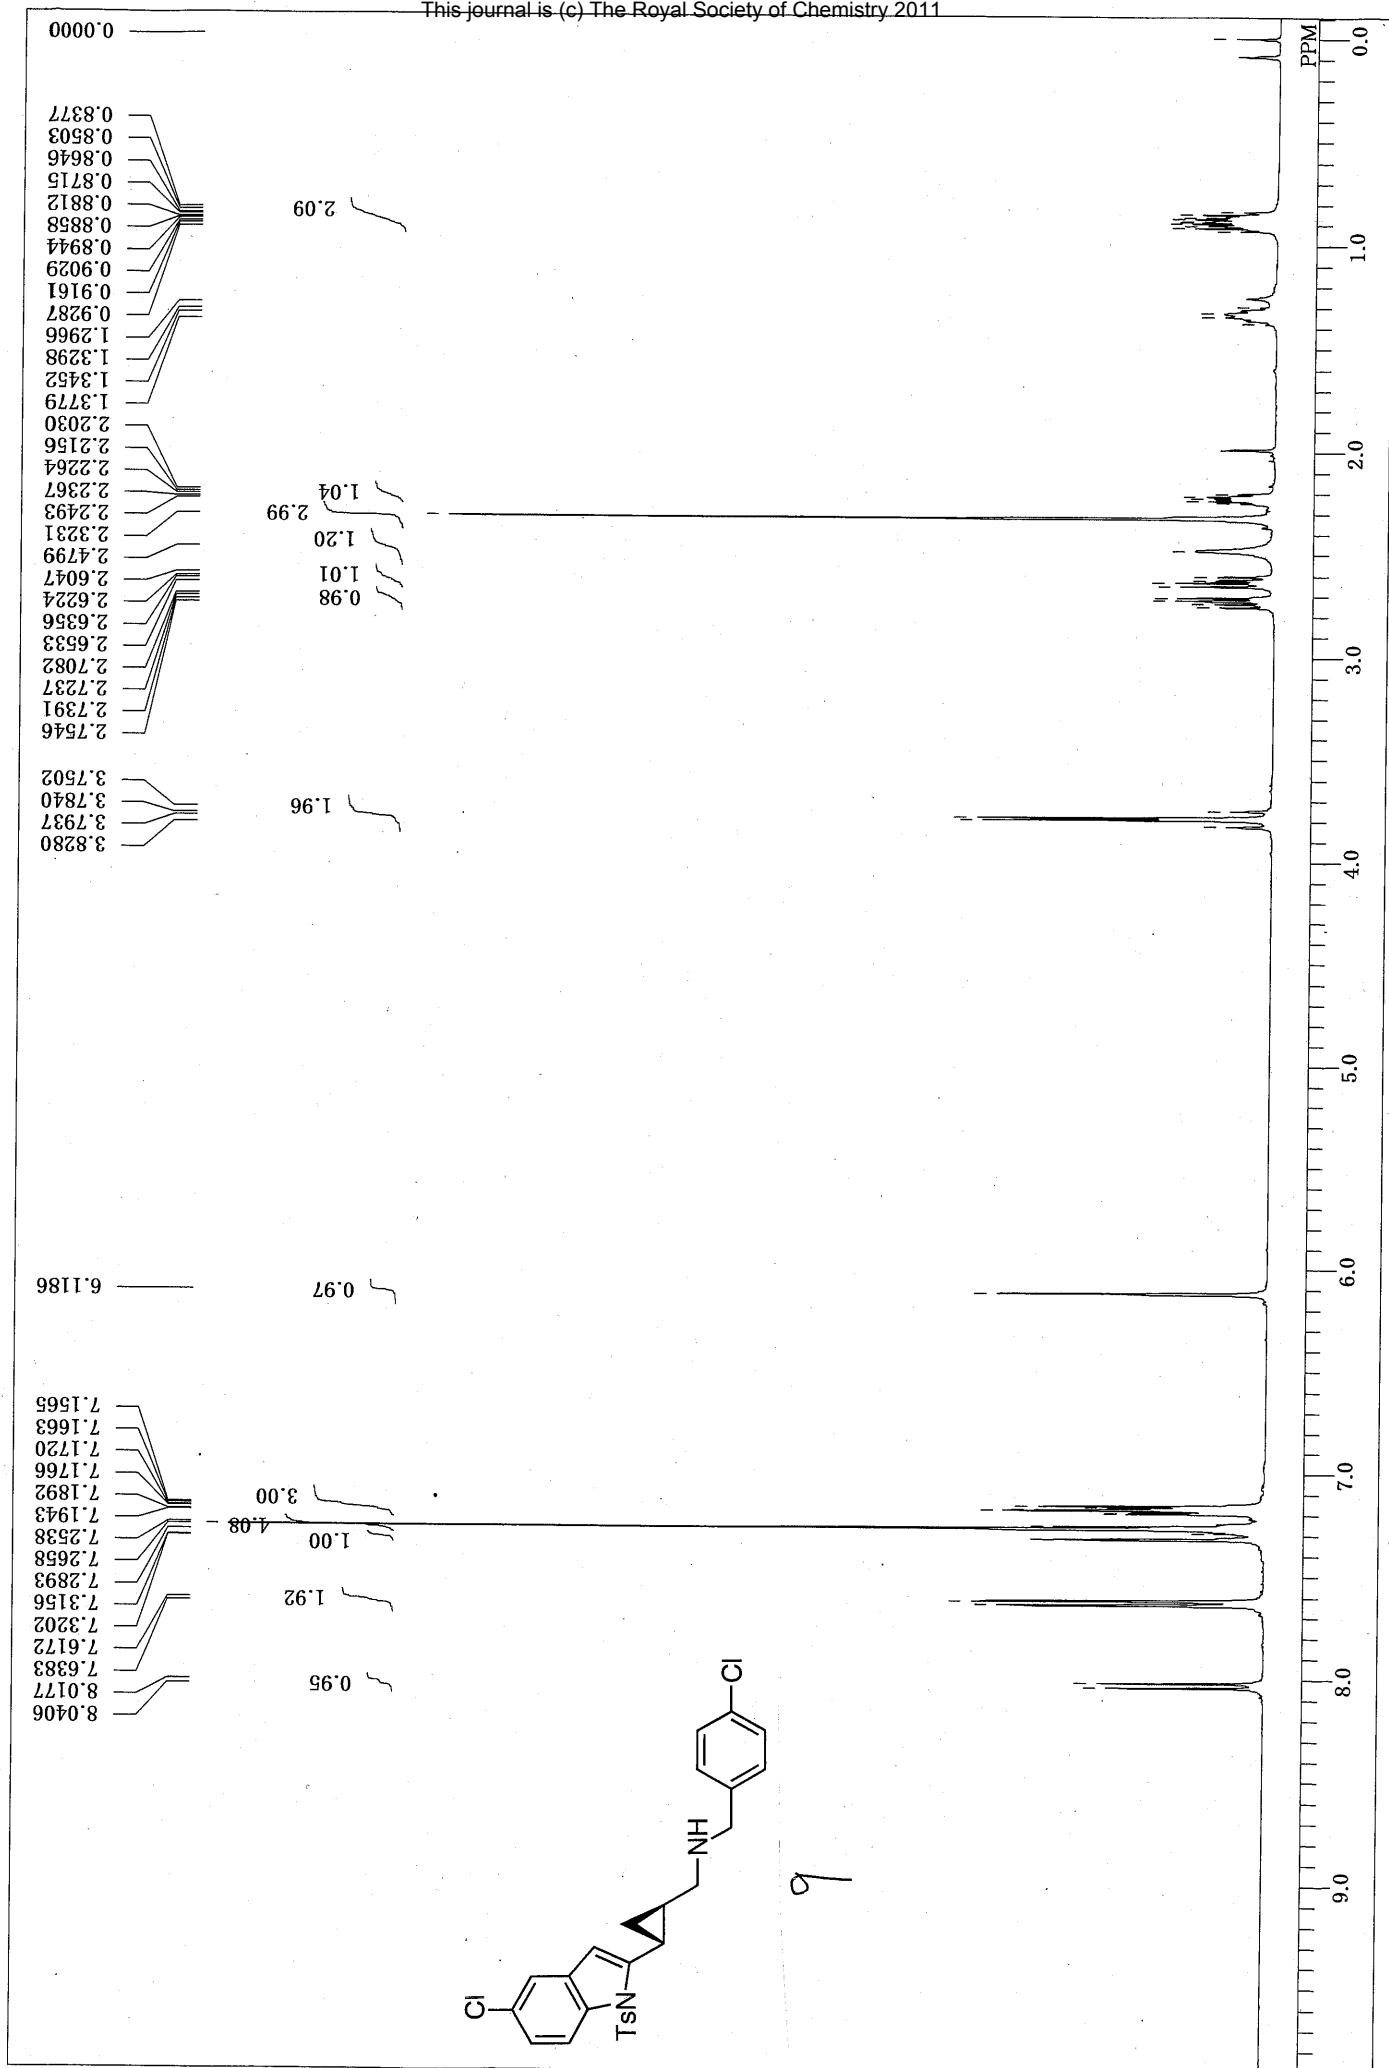

07KT3-25-1C(400, CDCl<sub>3</sub>)

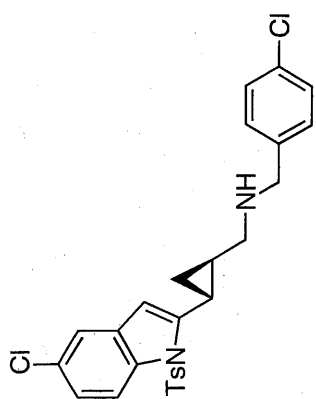

|          |   |
|----------|---|
| 144.9436 | — |
| 144.5029 | — |
| 138.6206 | — |
| 135.8710 | — |
| 135.3920 | — |
| 132.4892 | — |
| 130.5252 | — |
| 129.7875 | — |
| 129.3947 | — |
| 129.1169 | — |
| 128.4175 | — |
| 126.2907 | — |
| 123.9627 | — |
| 119.7186 | — |
| 115.4266 | — |
| 105.7505 | — |
| 52.8863  | — |
| 23.1011  | — |
| 21.5108  | — |
| 15.9926  | — |
| 13.0801  | — |

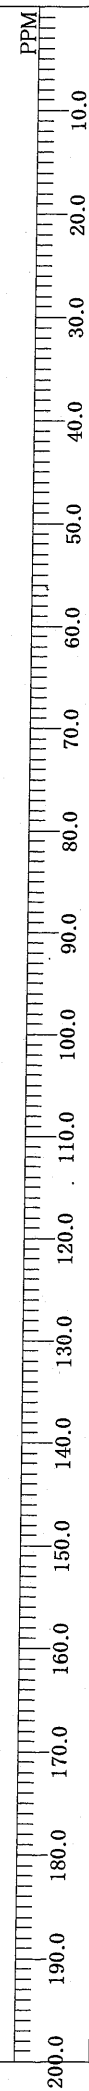

07KT7-15-1(500, CDCl<sub>3</sub>)

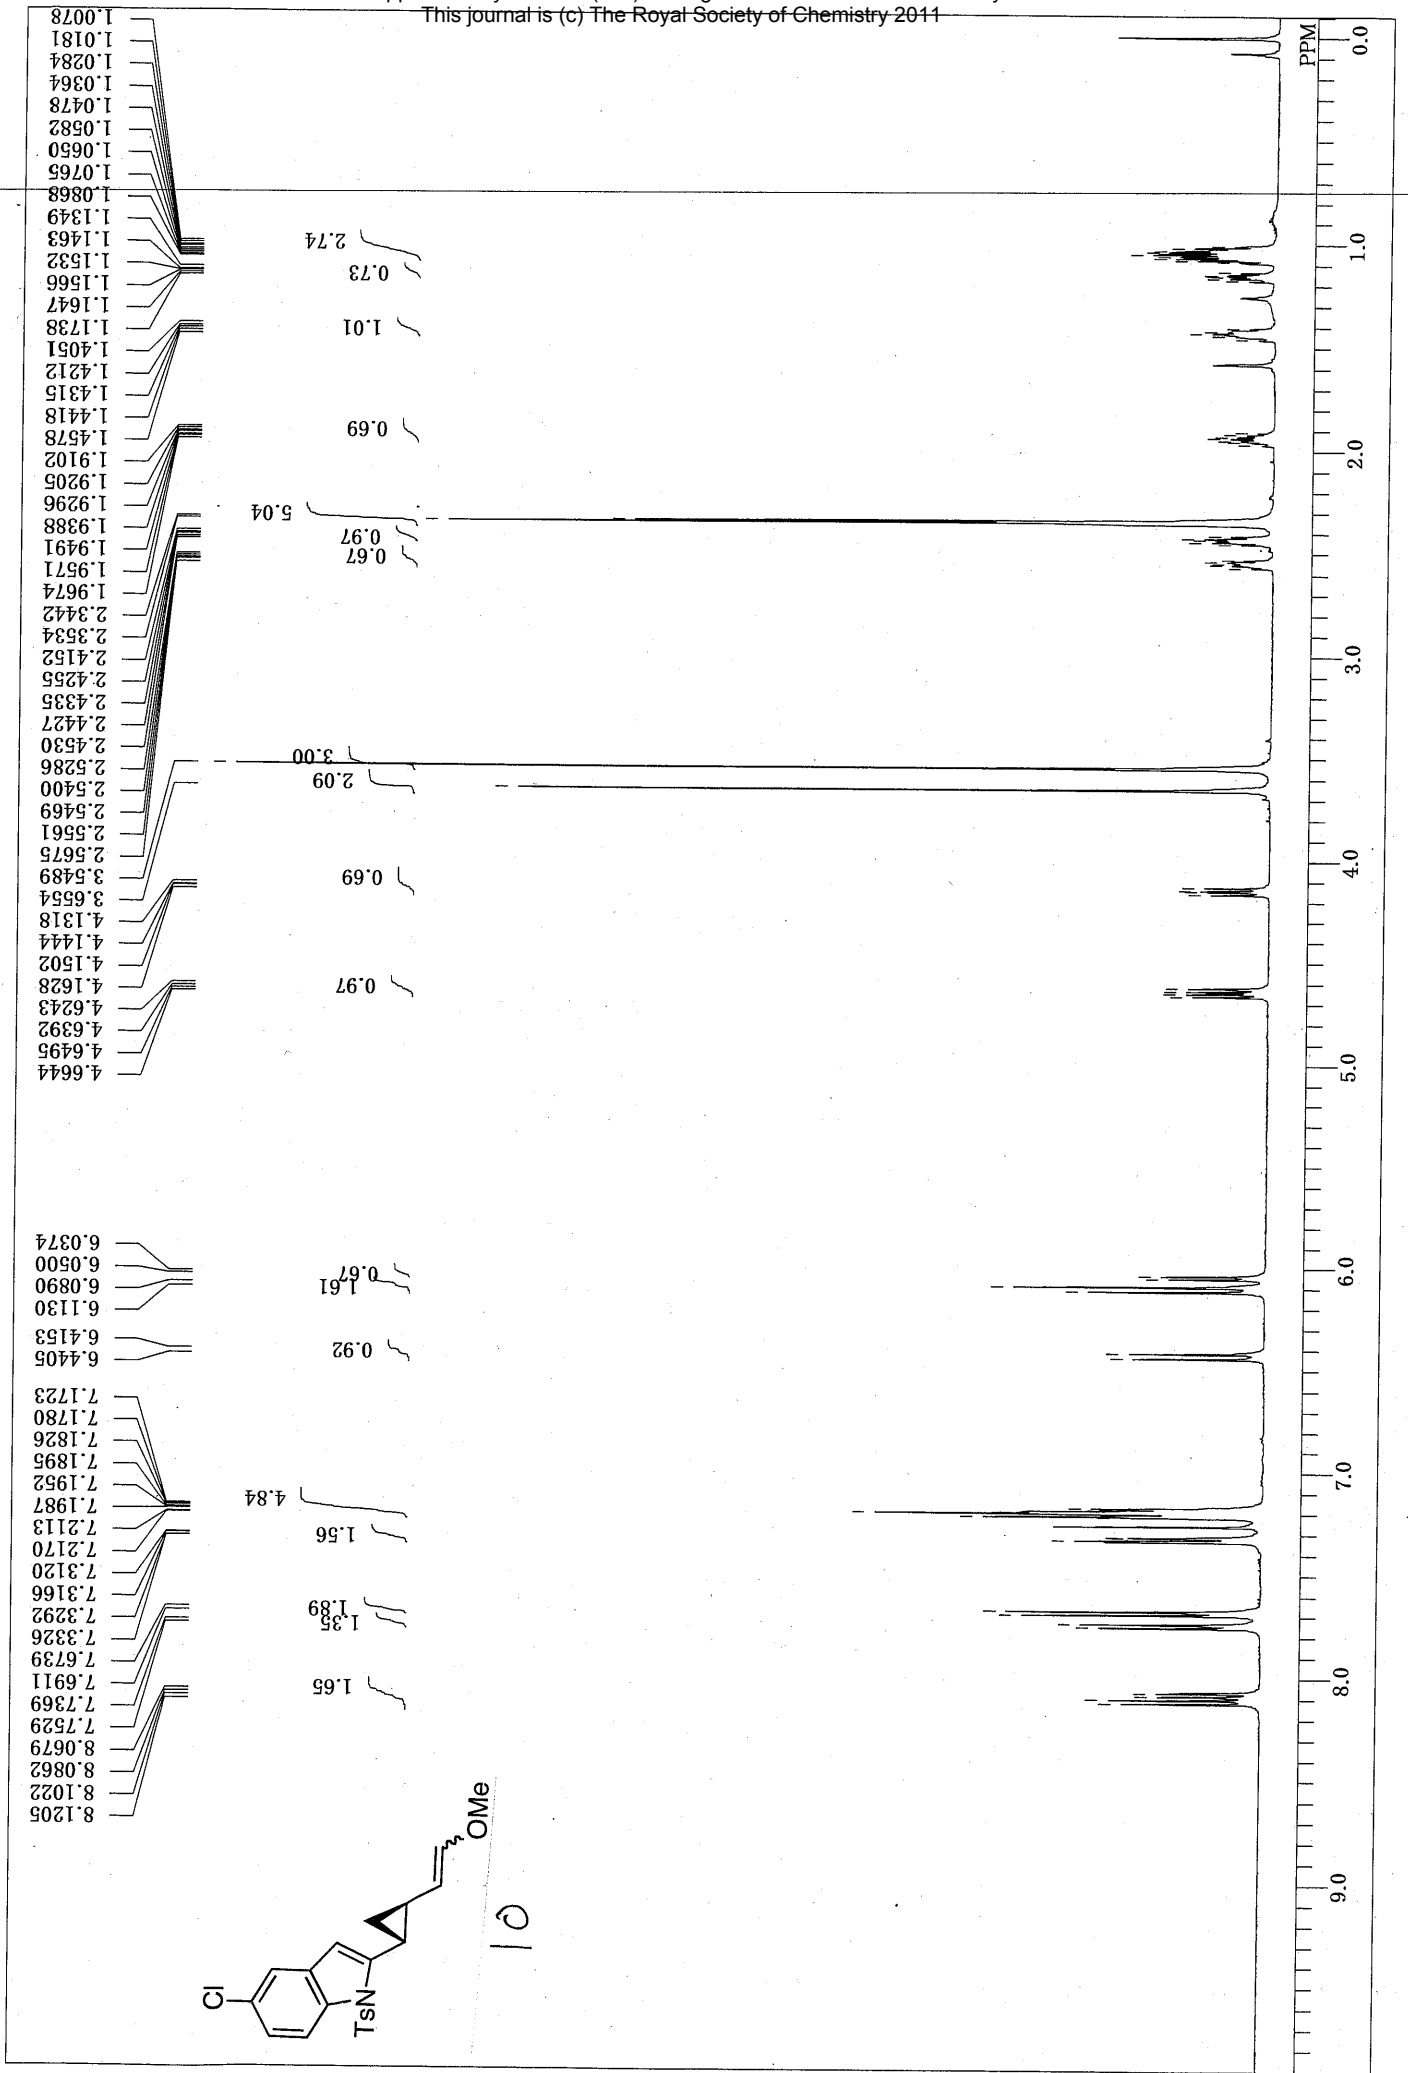

07KT7-15-1C(500, CDCl<sub>3</sub>)

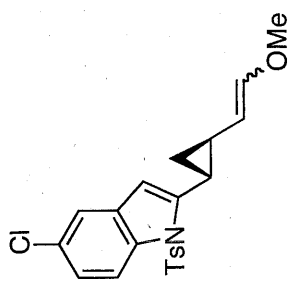

- 148.0510
- 147.0113
- 144.9033
- 144.7030
- 144.6840
- 136.0613
- 135.7942
- 135.5272
- 135.3173
- 130.7580
- 130.5863
- 129.7279
- 129.0793
- 129.0316
- 126.7901
- 126.5993
- 123.8904
- 123.7664
- 119.6172
- 115.5539
- 115.5253
- 108.2189
- 105.0331
- 104.9378
- 104.0602

- 59.7929
- 56.0252
- 22.5648
- 21.5823
- 21.5633
- 20.0944
- 18.2248
- 17.6907
- 15.8784
- 15.3729

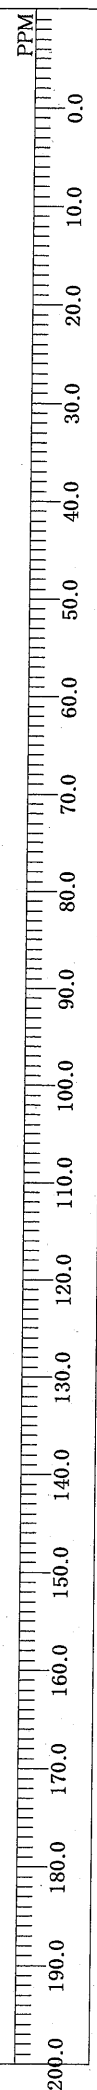



07KT3-28-1(500, CDCl3)

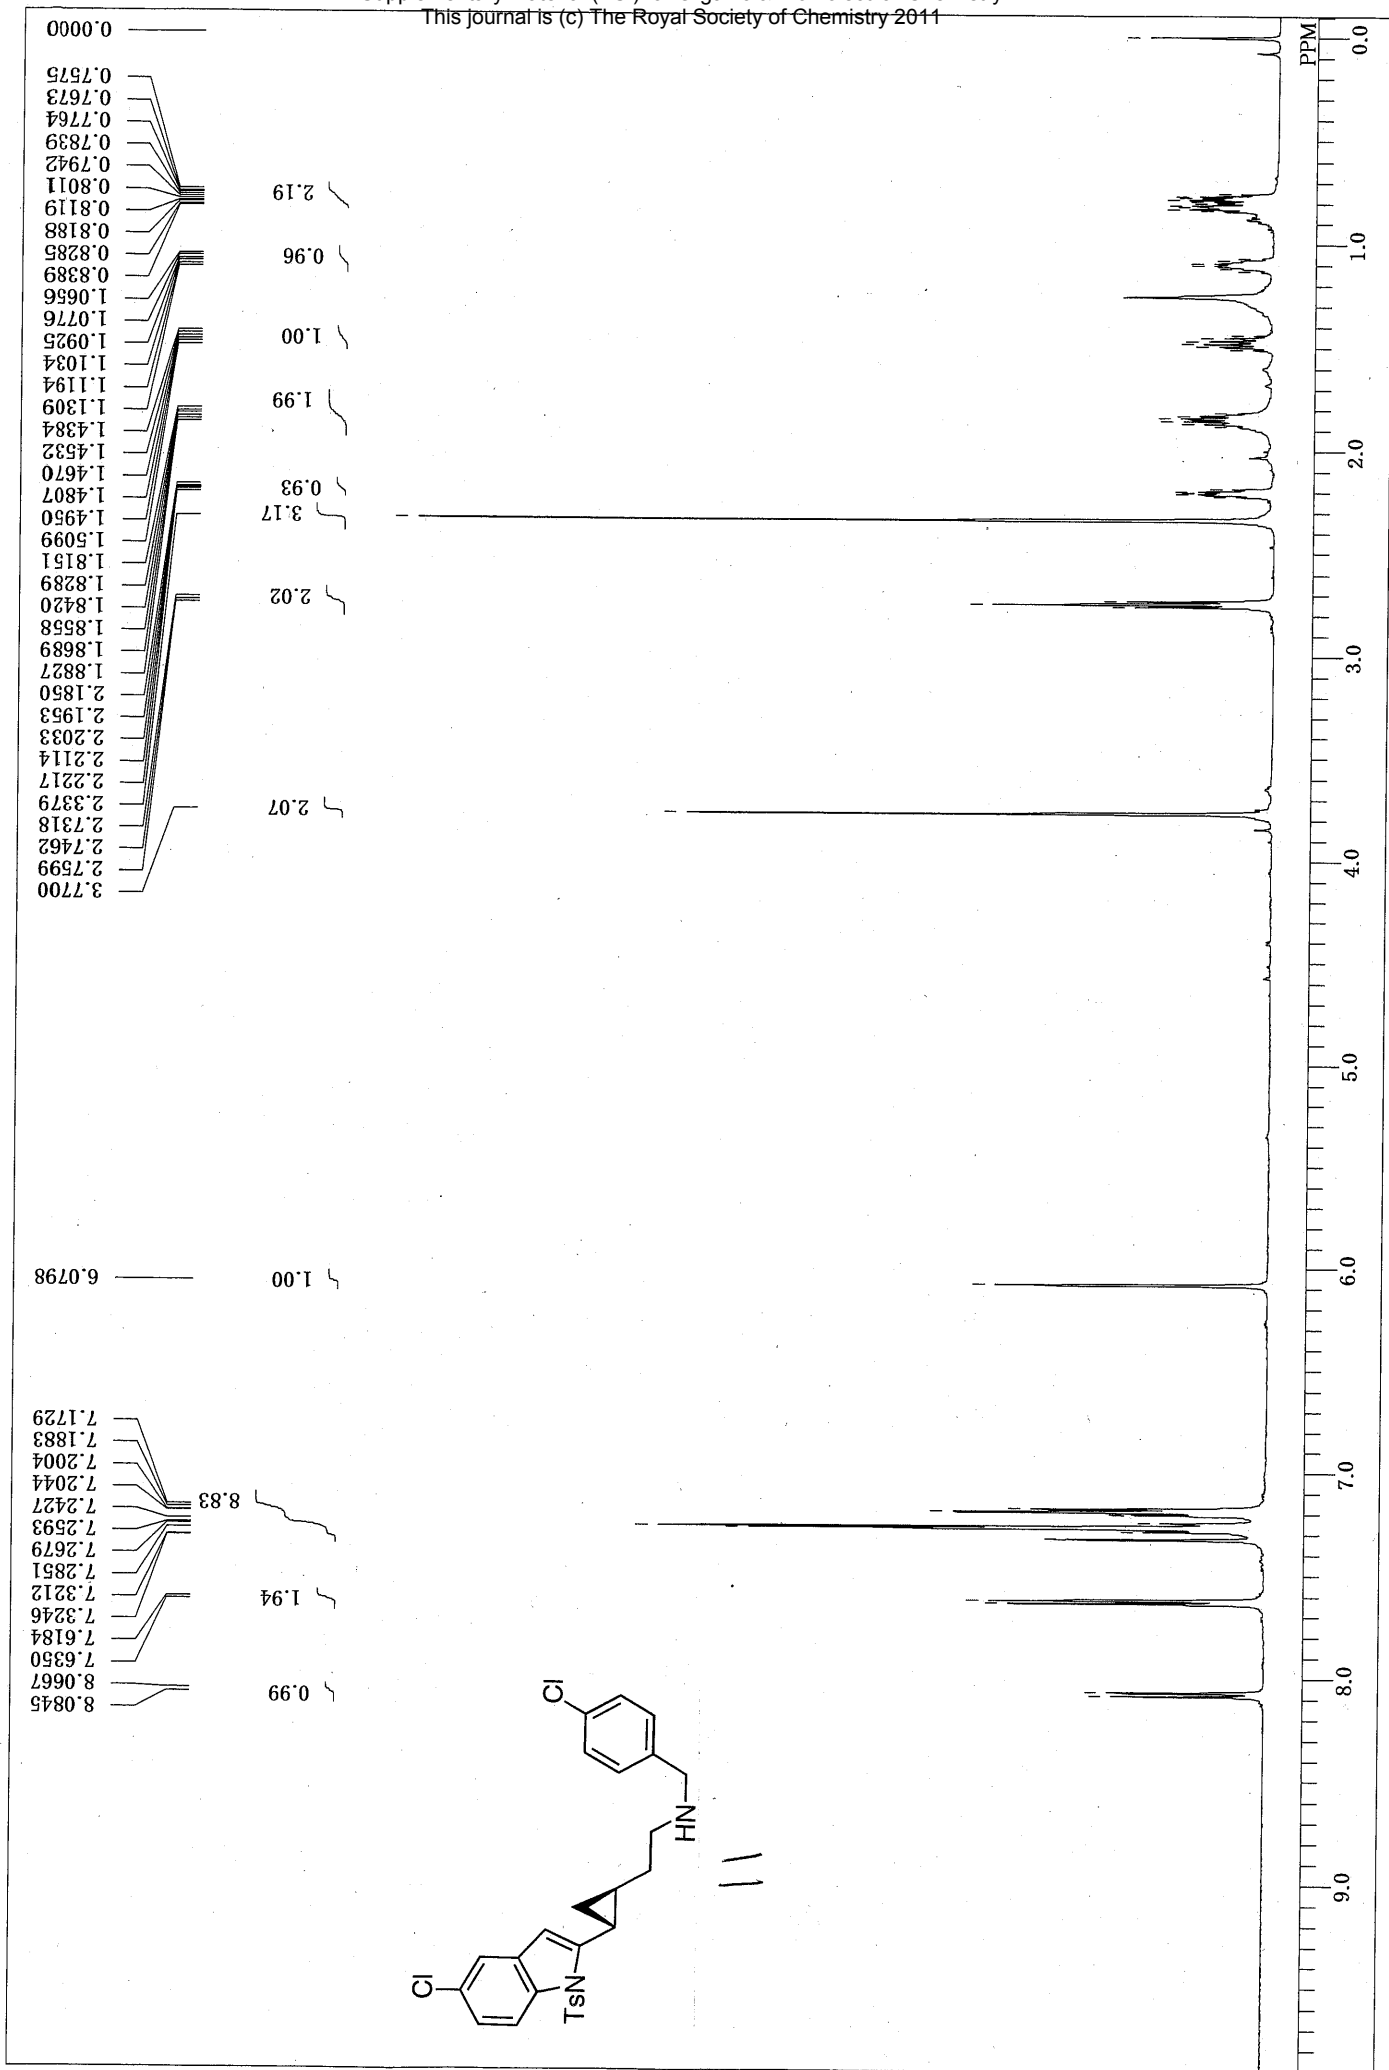

07KT3-28-1C(500,CDCl3)

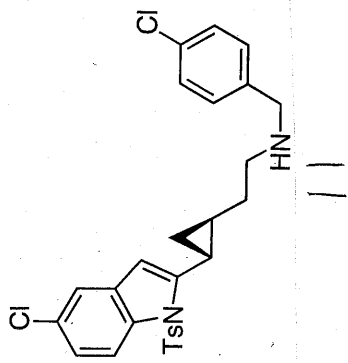

145.1895  
144.8747  
138.7130  
136.1281  
135.5176  
132.5798  
130.6054  
129.7755  
129.4226  
129.0983  
128.4783  
126.3608  
123.8999  
119.6268  
115.5253  
105.3574

53.1828  
48.6521

33.9345

21.5537  
20.8002  
16.3649  
15.4873

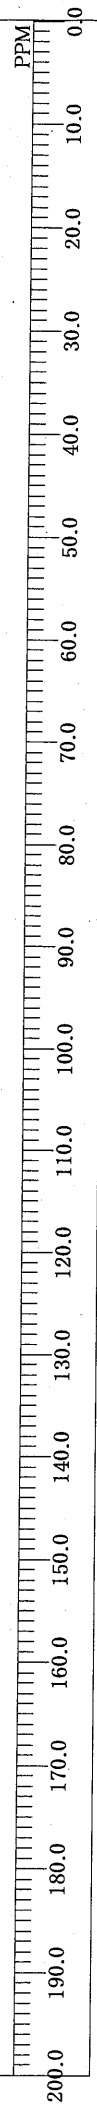

07KT4-82-1(500,CDCl3)

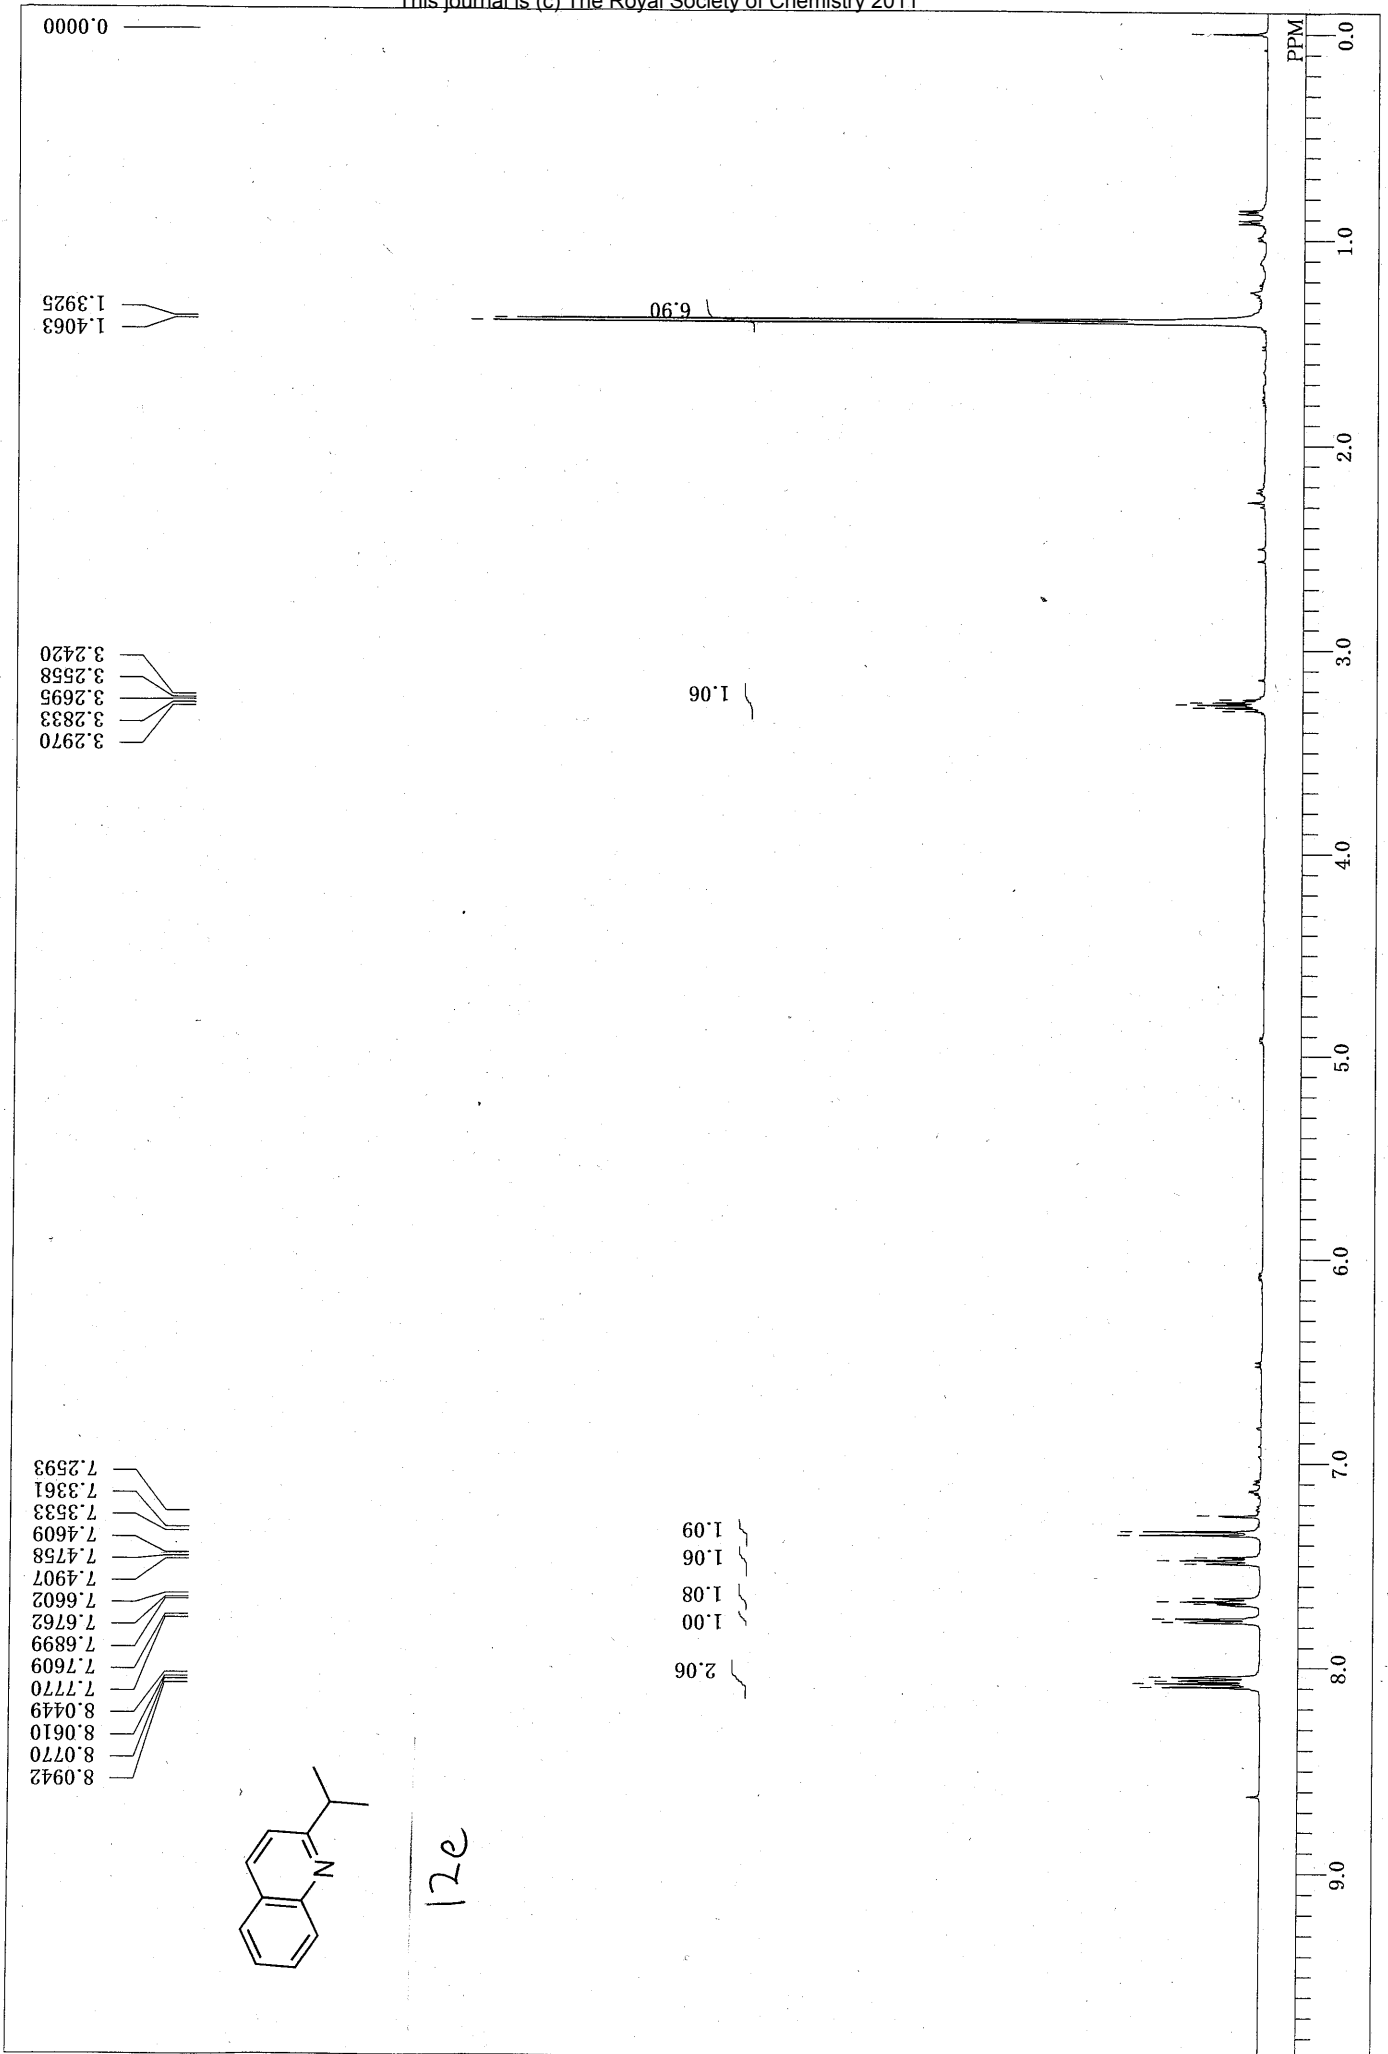

07KT4-80-1(400, CDCl<sub>3</sub>)

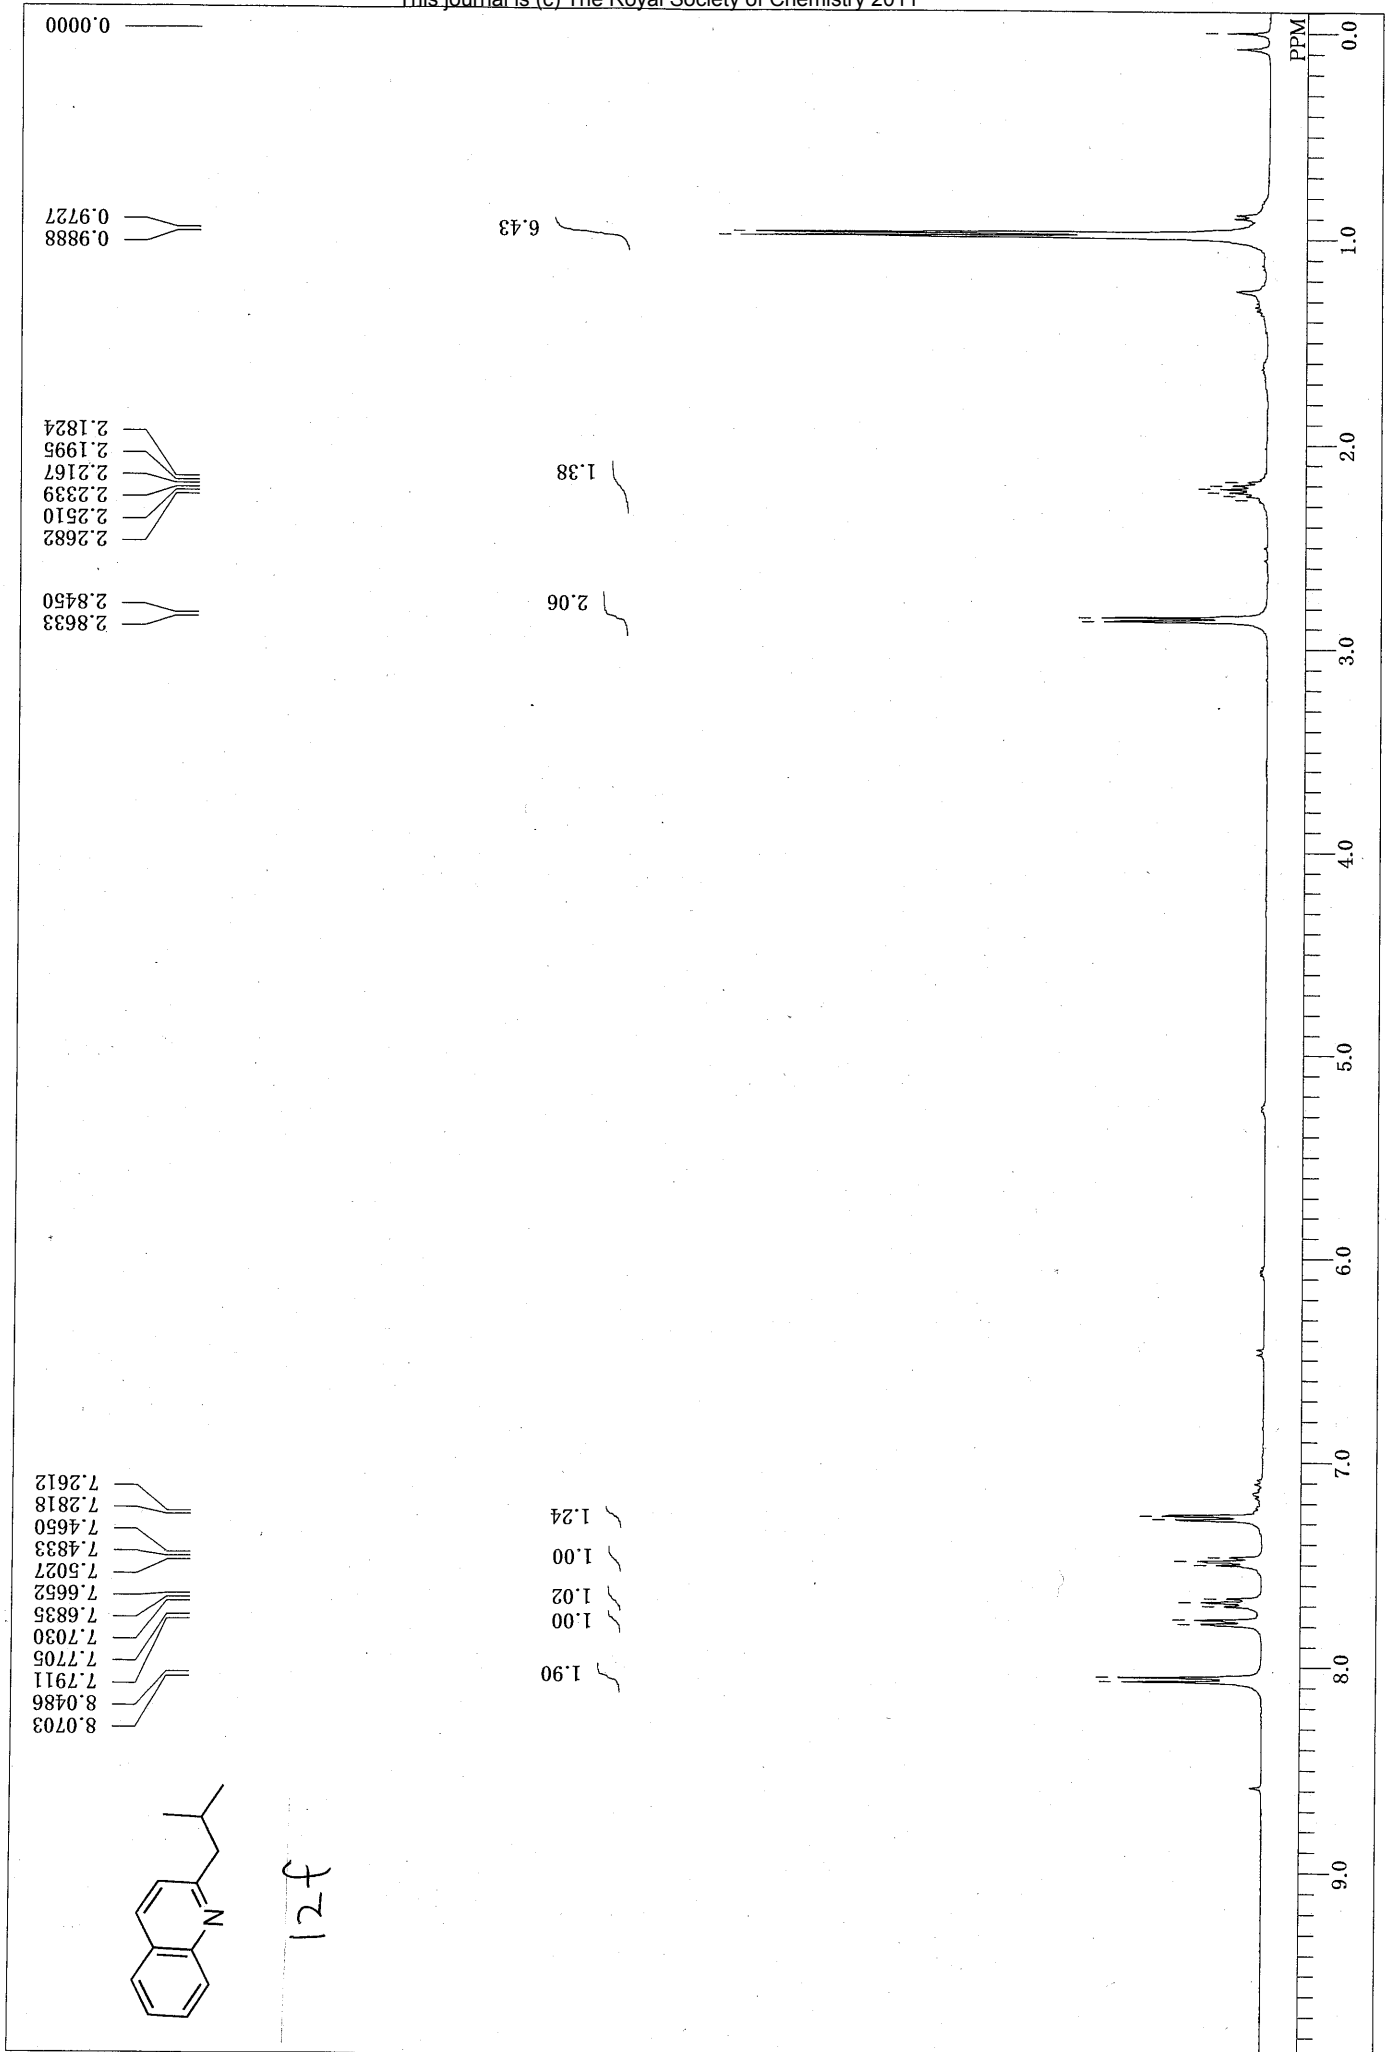

07KT4-83-1(500,CDCl3)

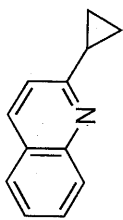

12h

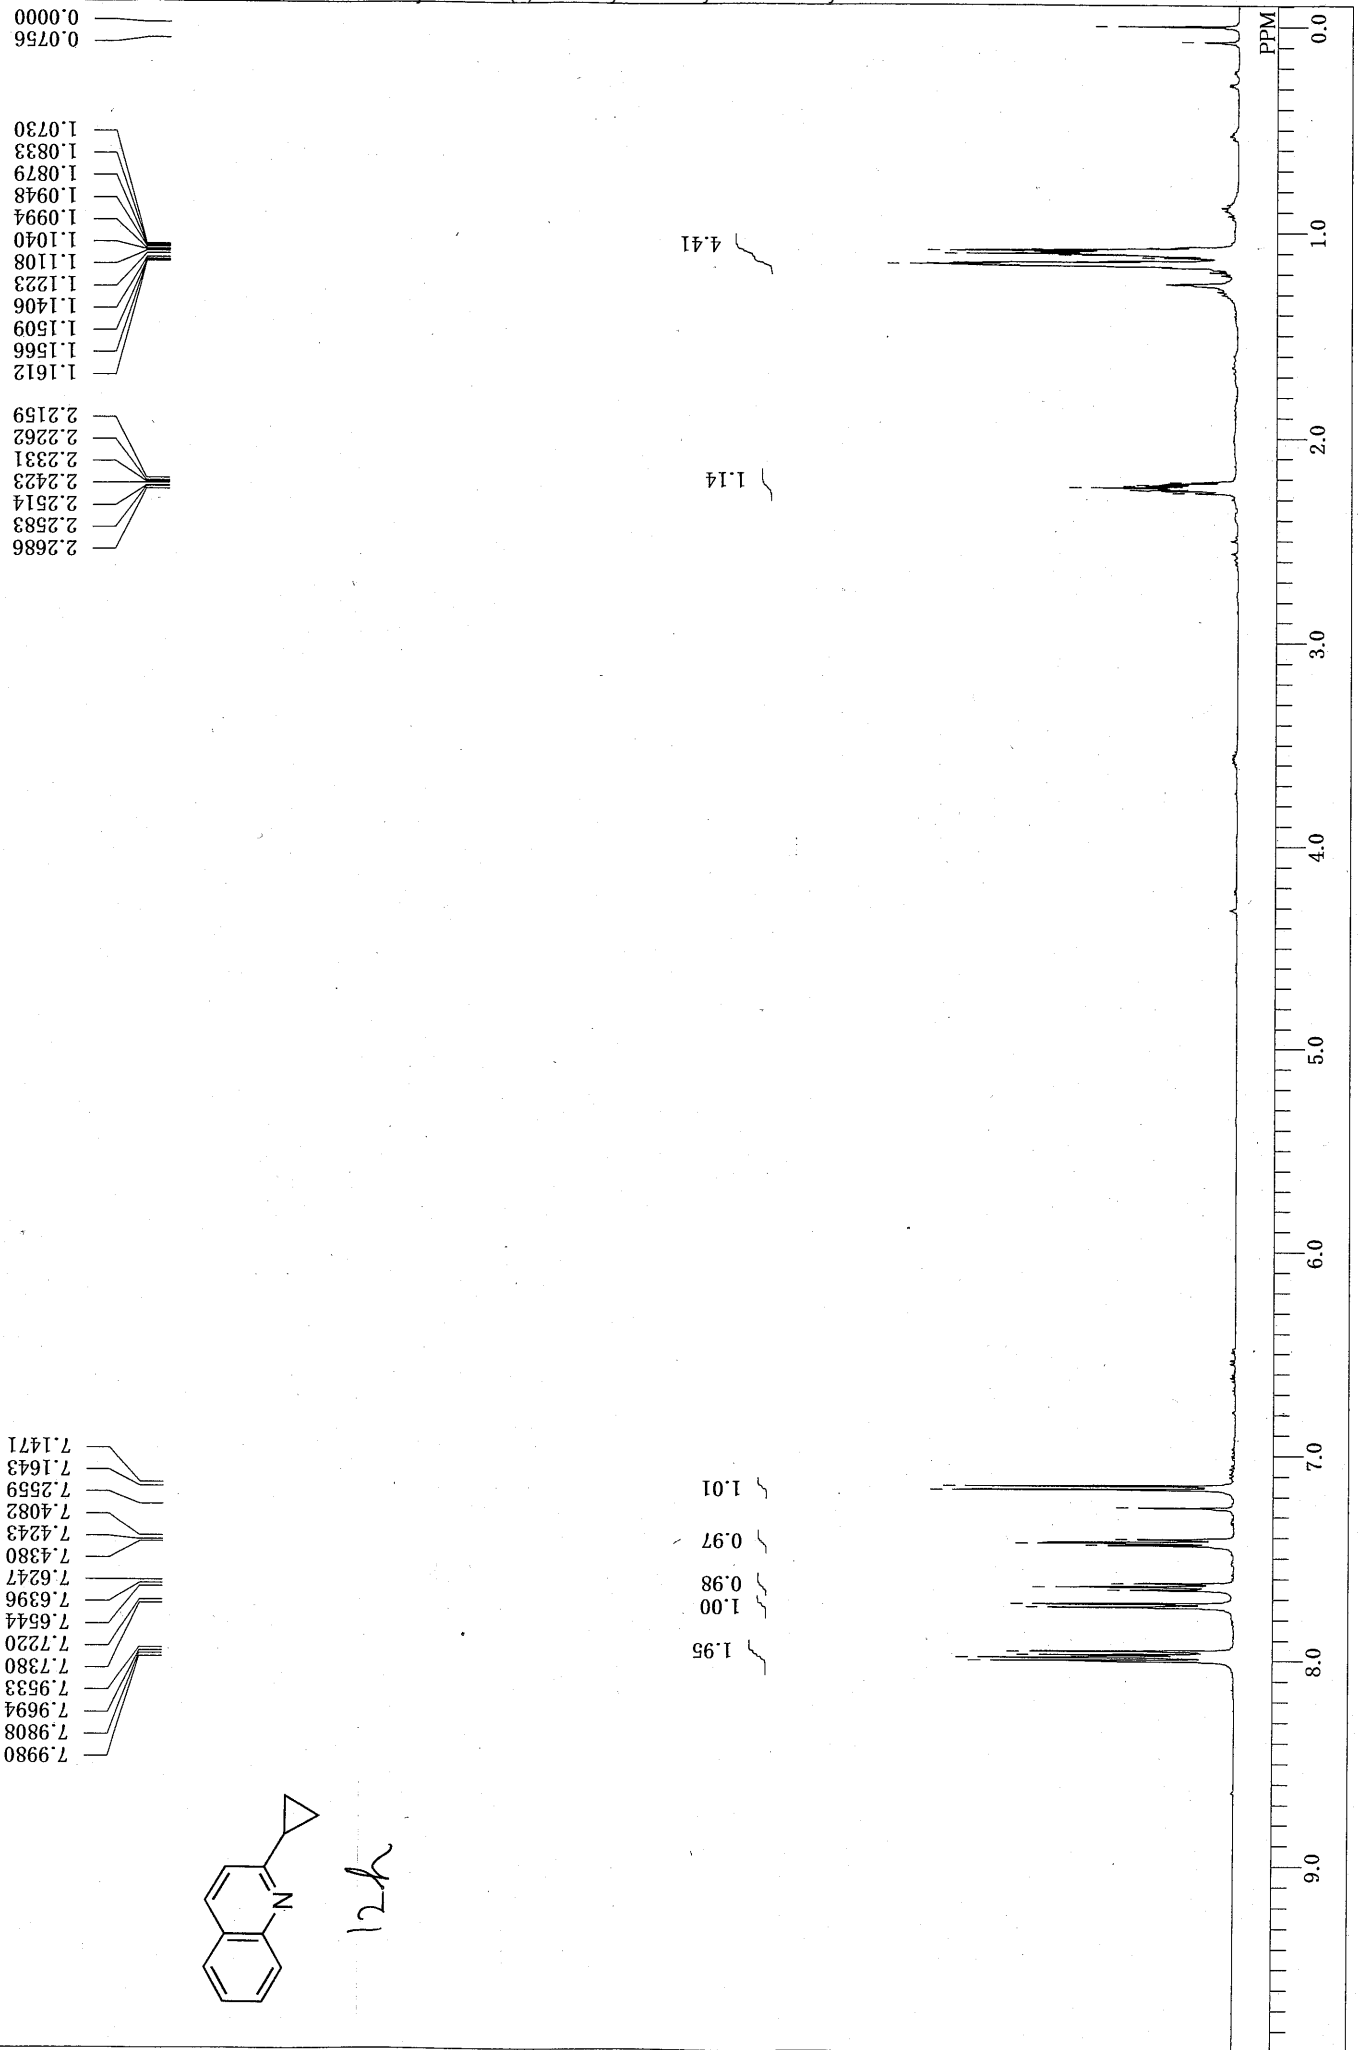

07KT5-44-1a(400, CDCl<sub>3</sub>)

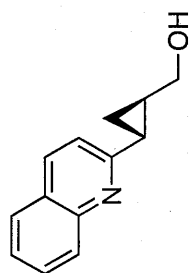

121

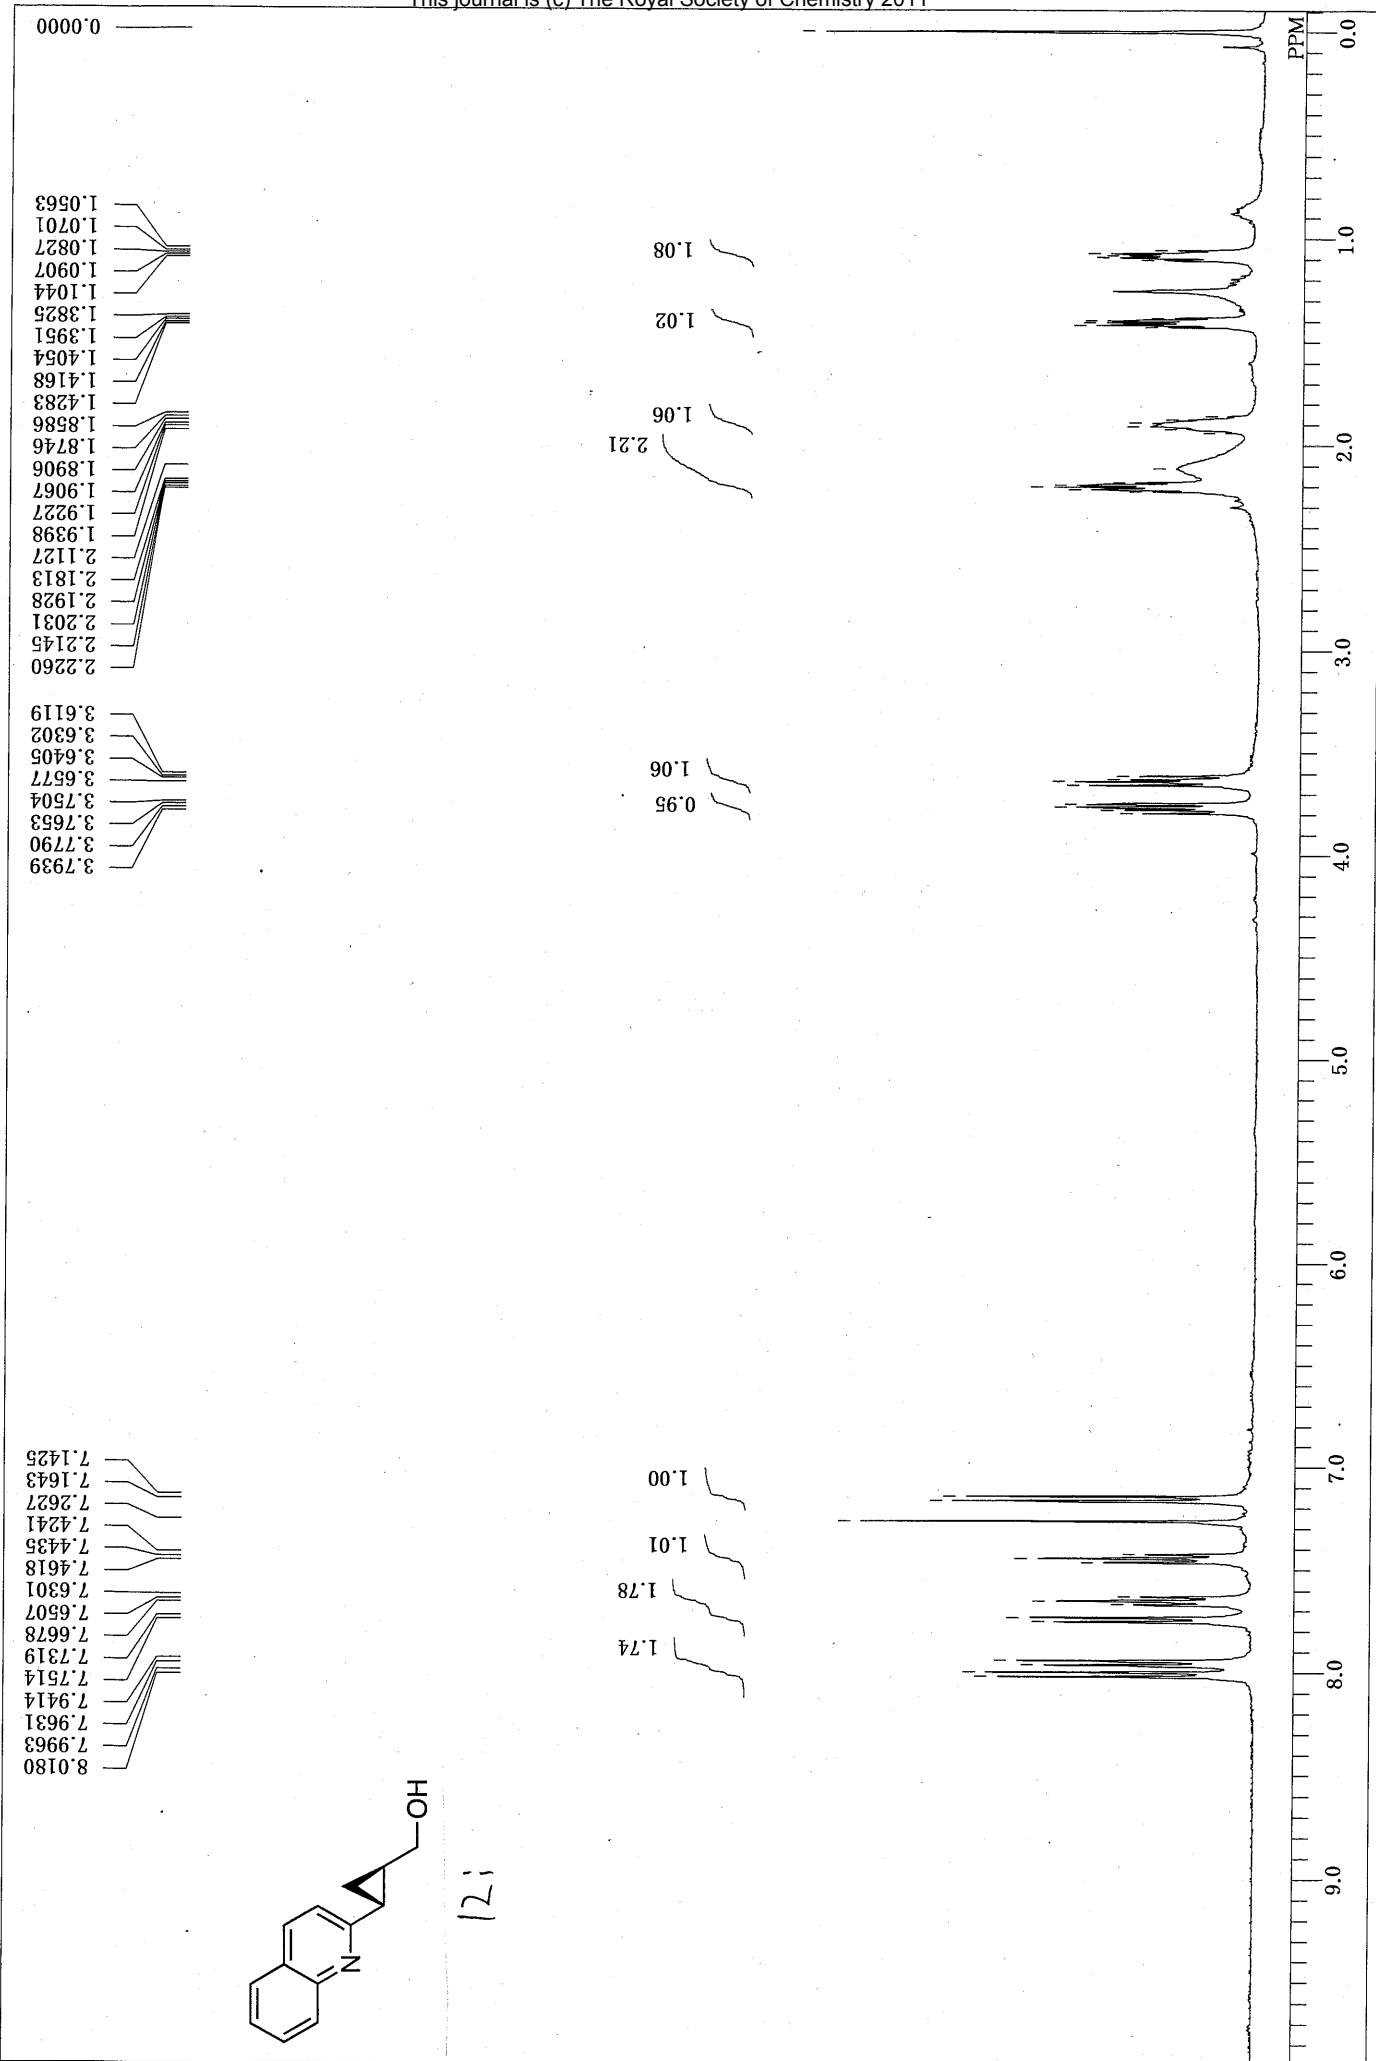

07KT5-44-1a C(500, CDCl<sub>3</sub>)

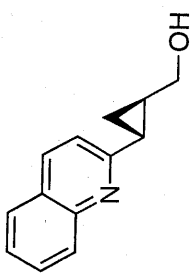

12i

65.9928

14.5335

23.8715  
26.3324

119.2739

125.3879

126.7137

127.4673

128.4306

129.4703

136.1185

147.7076

161.9674

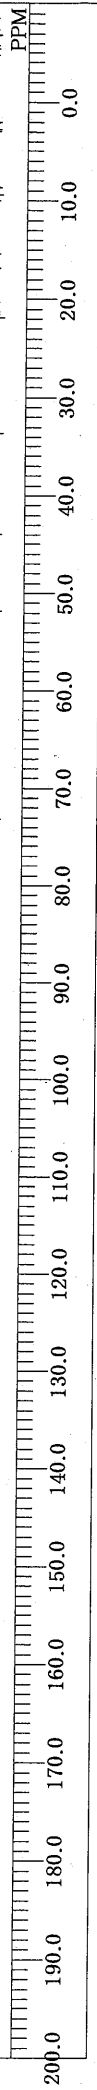

07KT5-95-2(400, CDCl3)

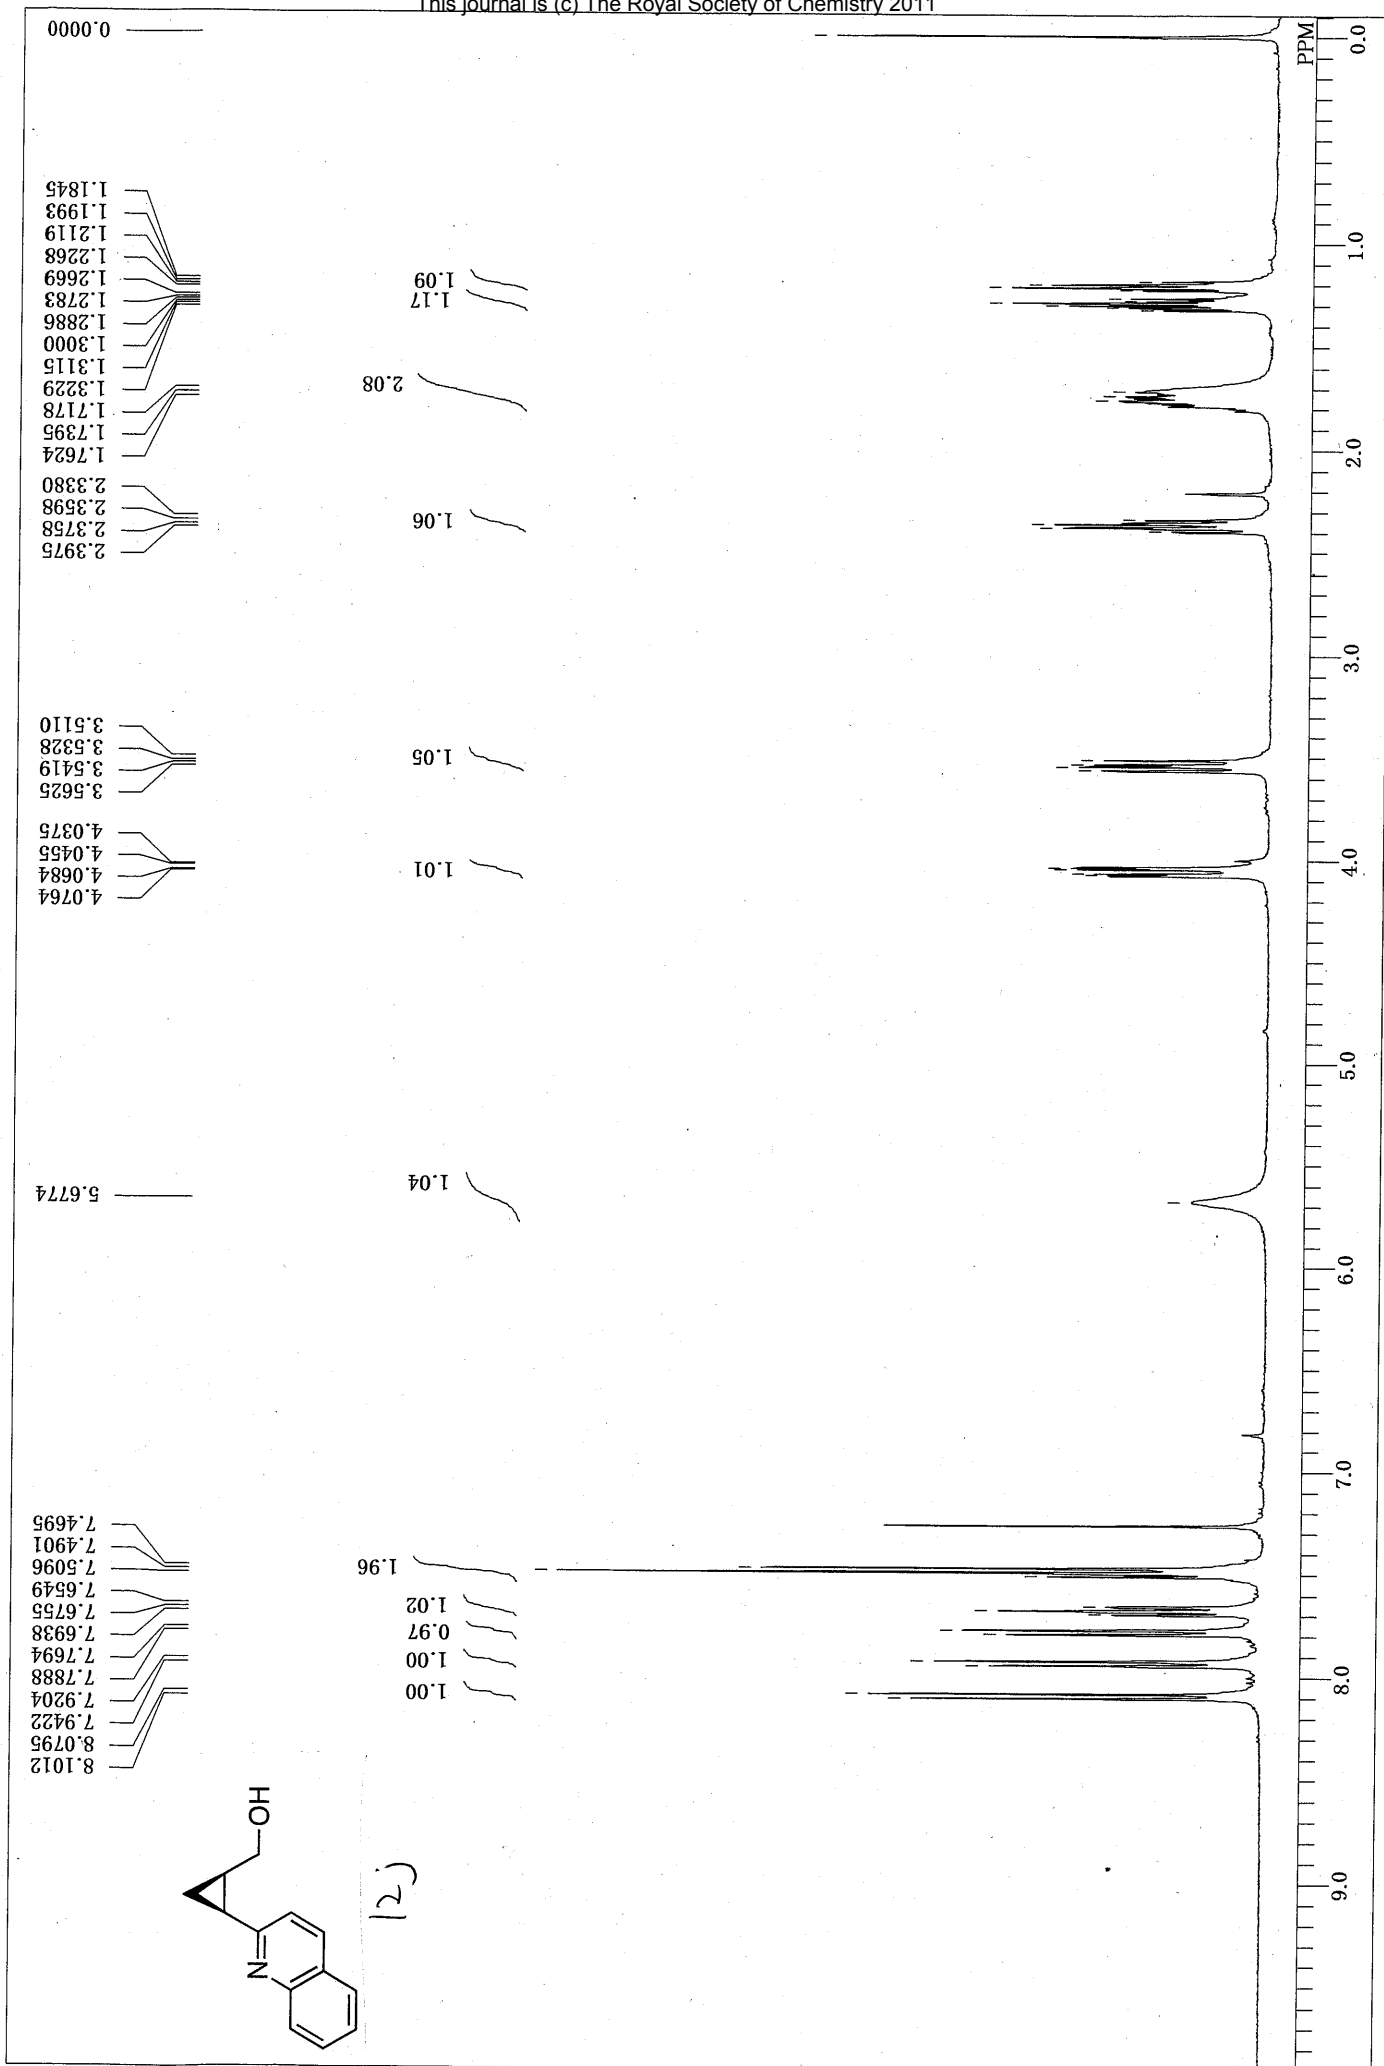



07KT5-95-1C(400, CDCl3)

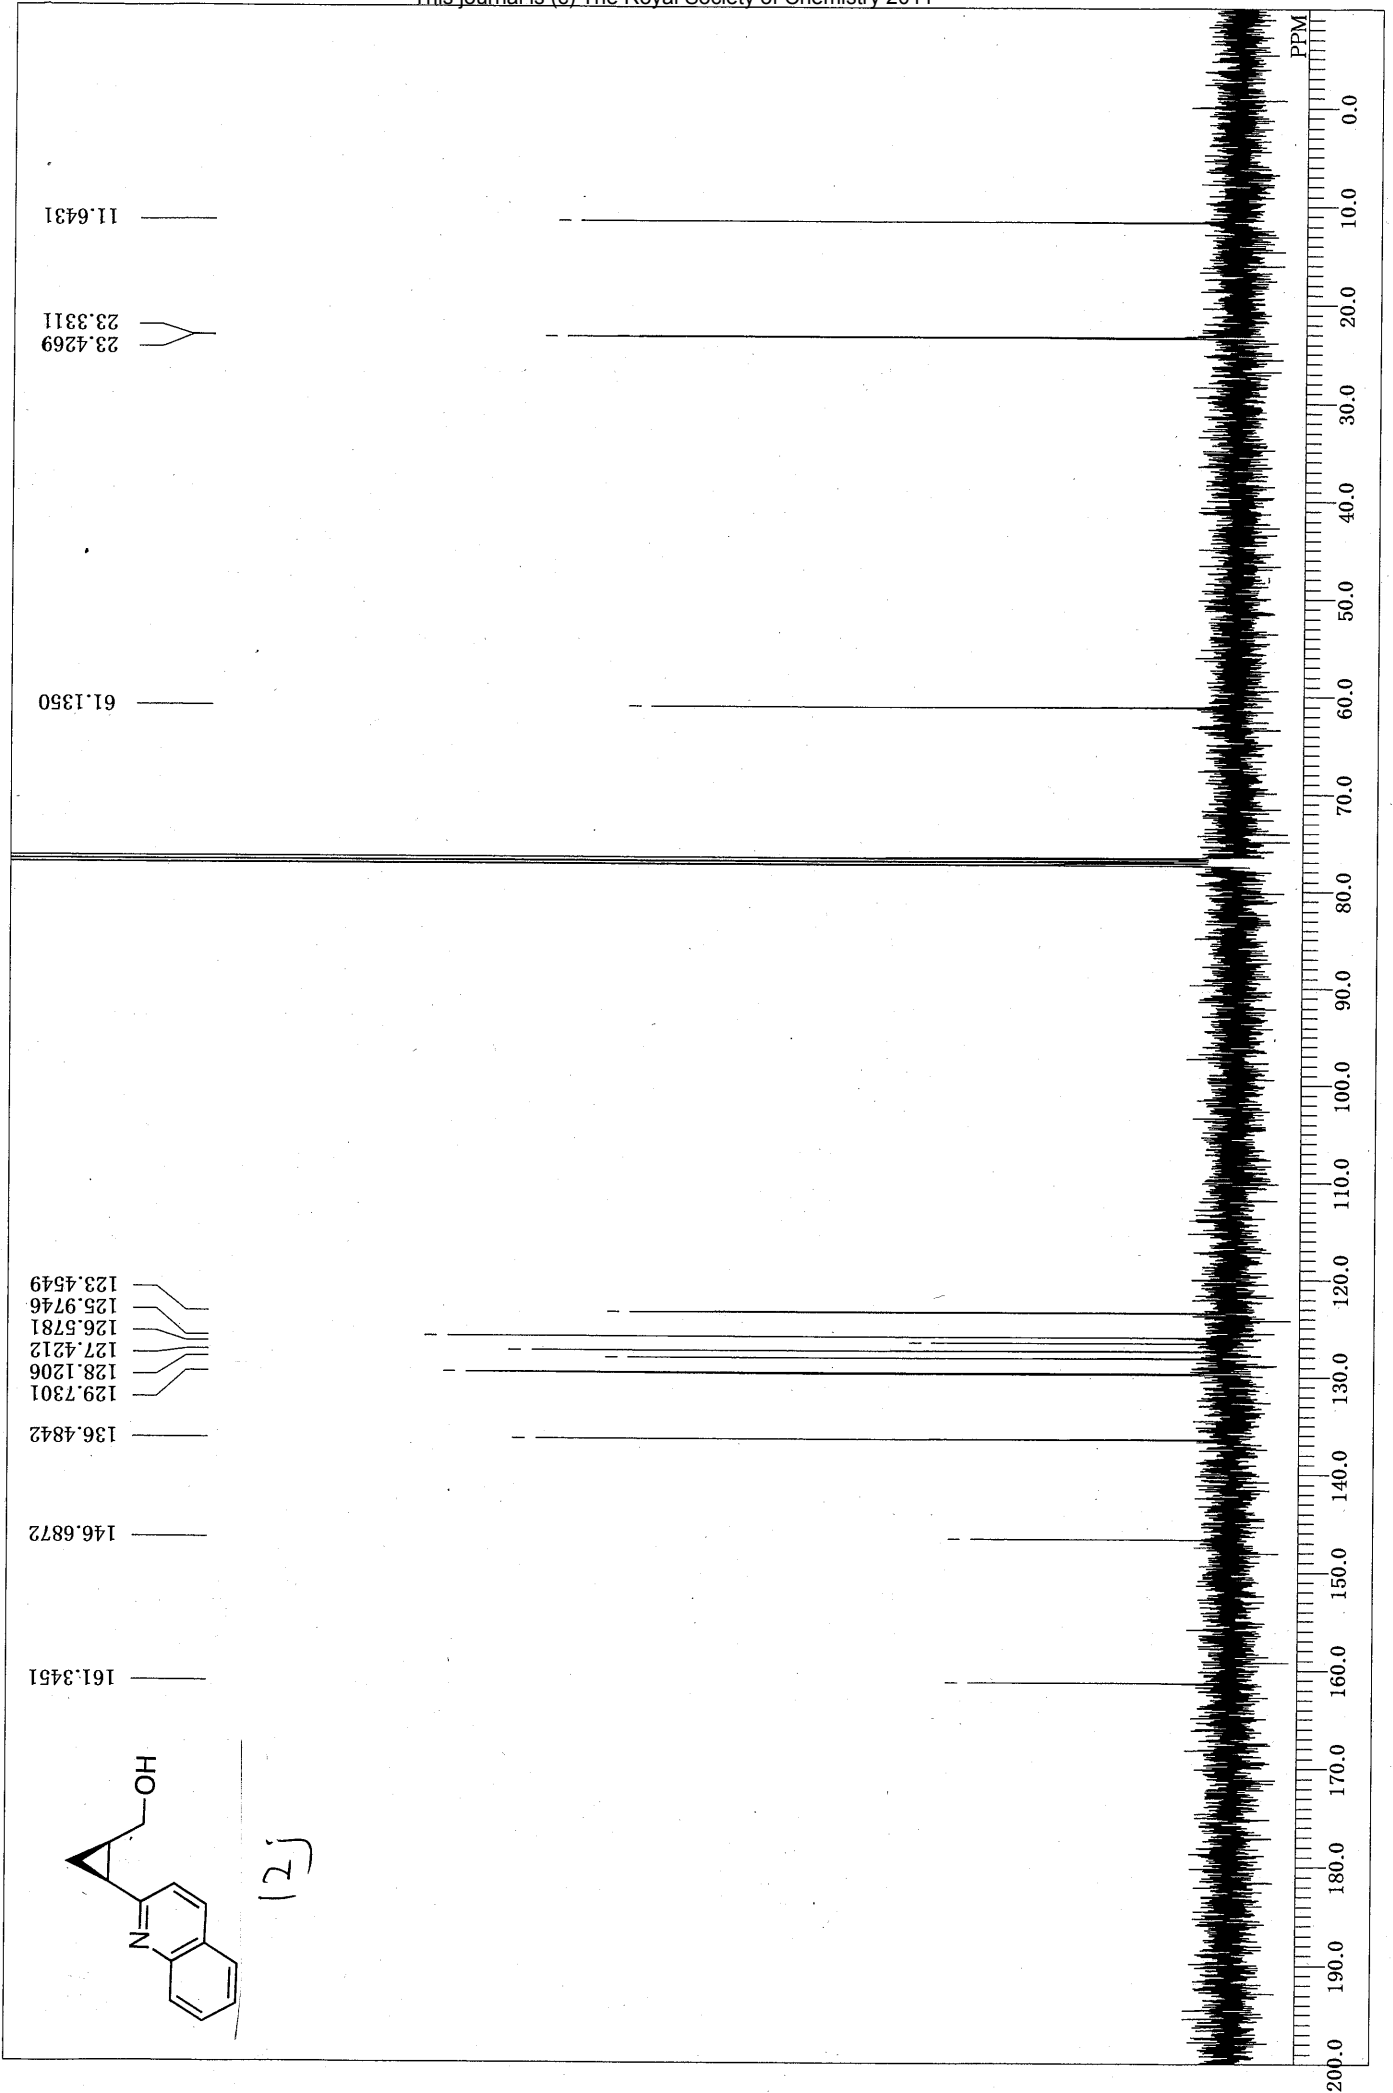

07KT4-100-1(500, CDCl<sub>3</sub>)

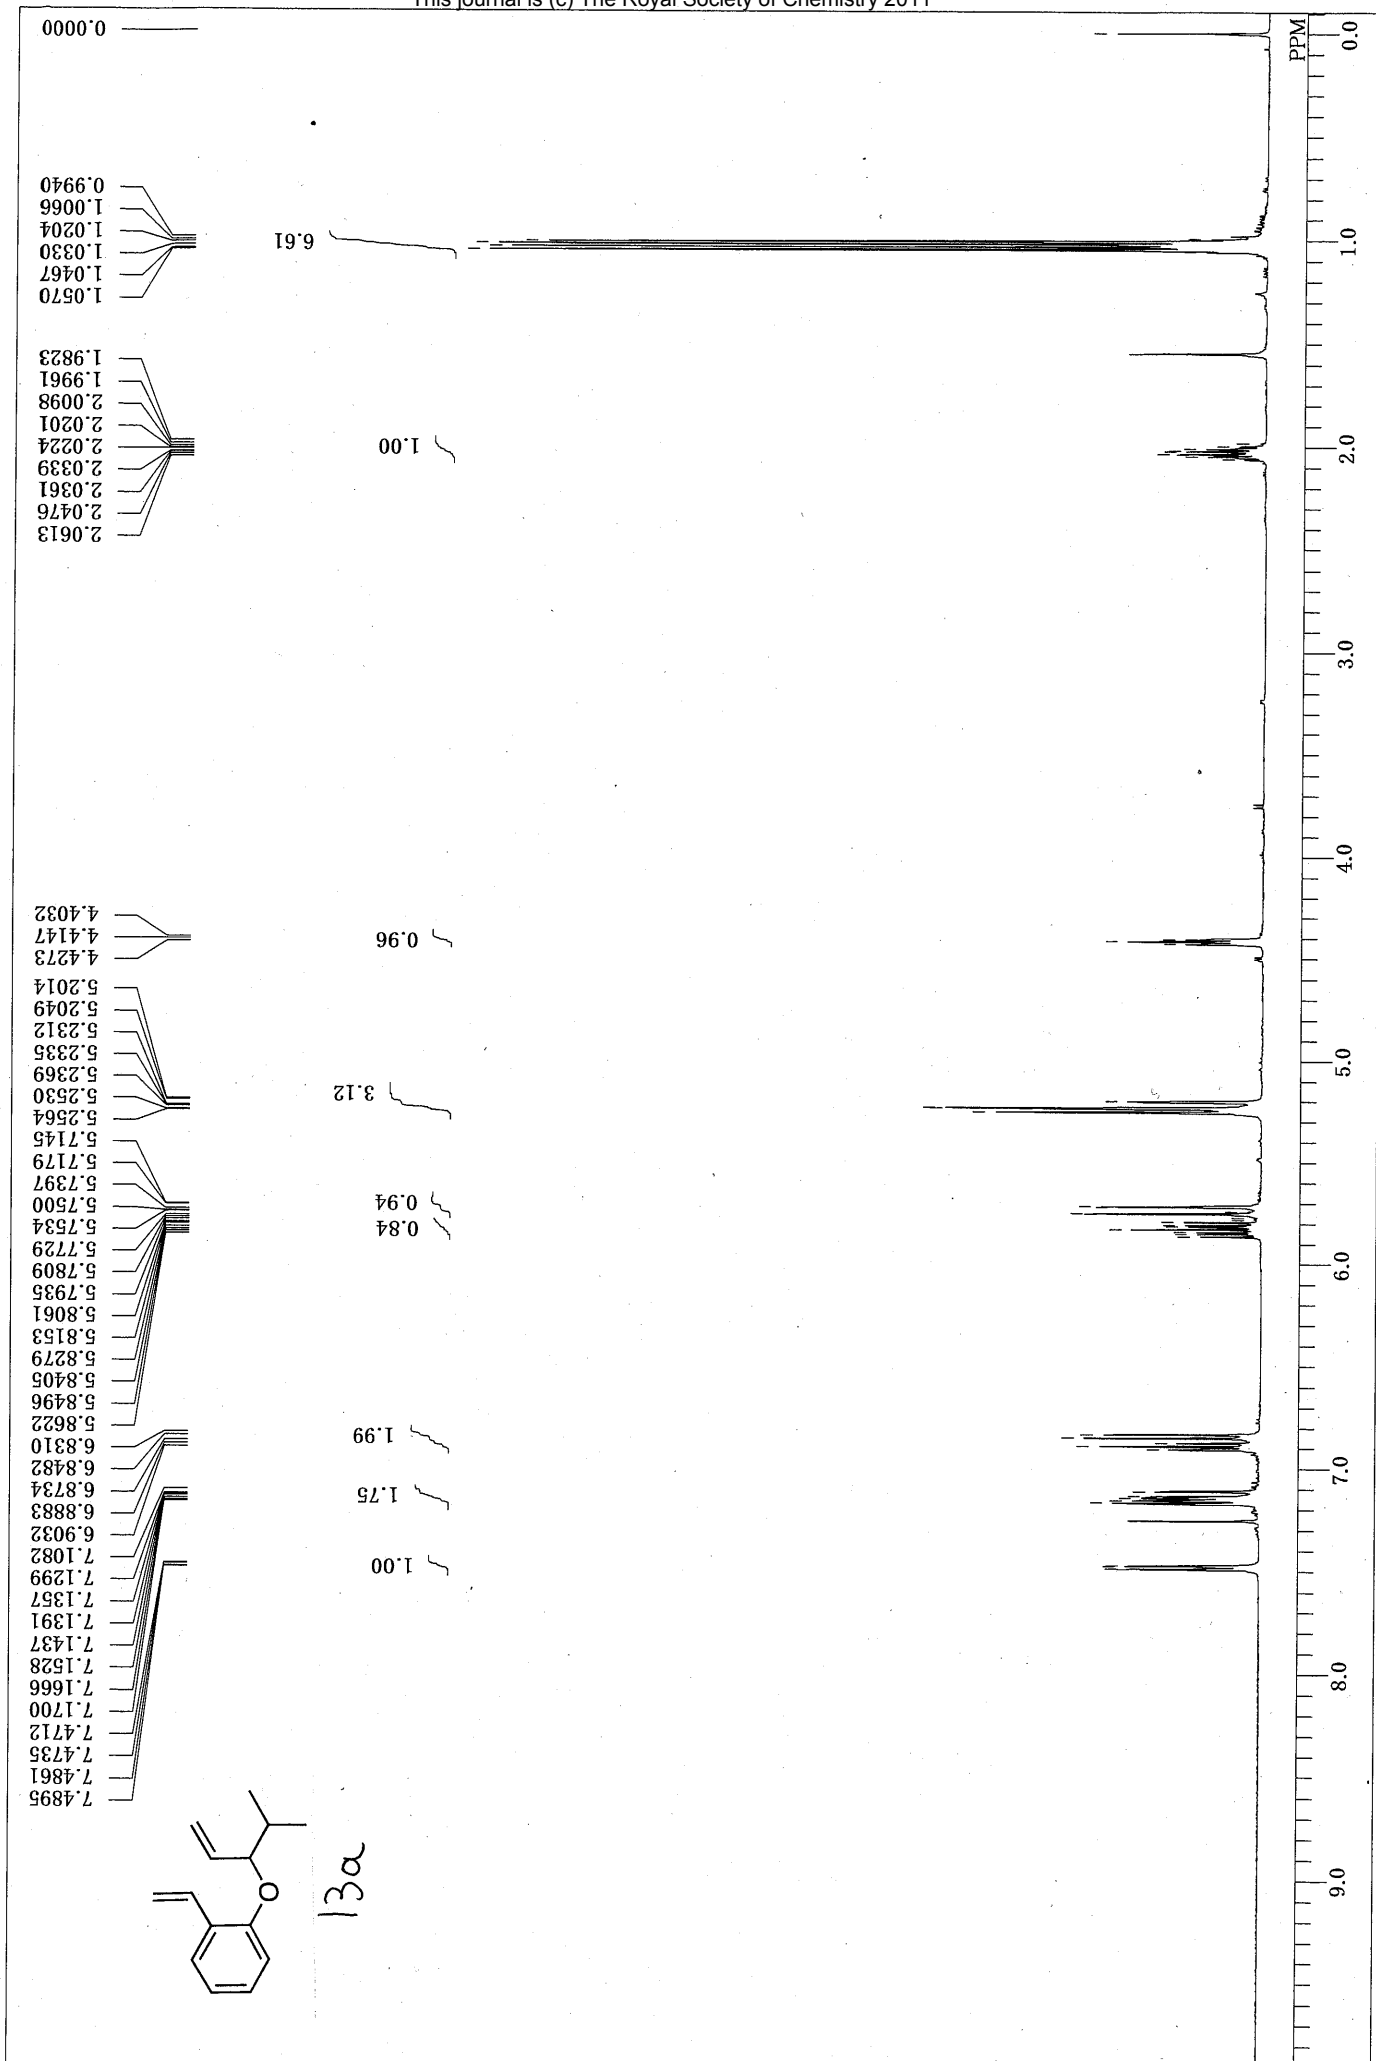

07KT4-100-1C(500, CDCl3)

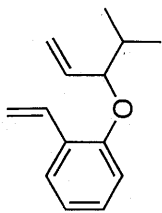

13a

18.3202  
18.0150

32.9711

83.9534

113.8561  
113.9801  
117.4806

120.3898  
126.1796  
127.2860  
128.4783

131.7595  
136.0899

155.5290

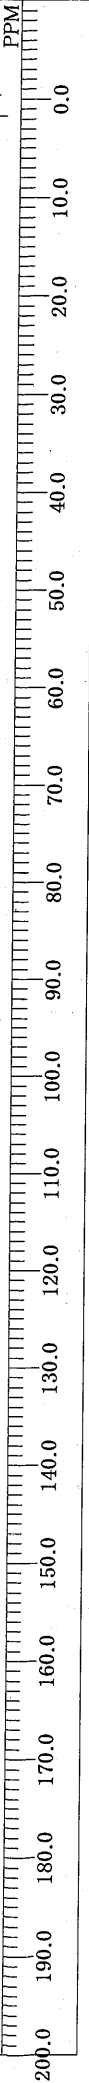

07KT5-78-2(400MHz, CDCl3)

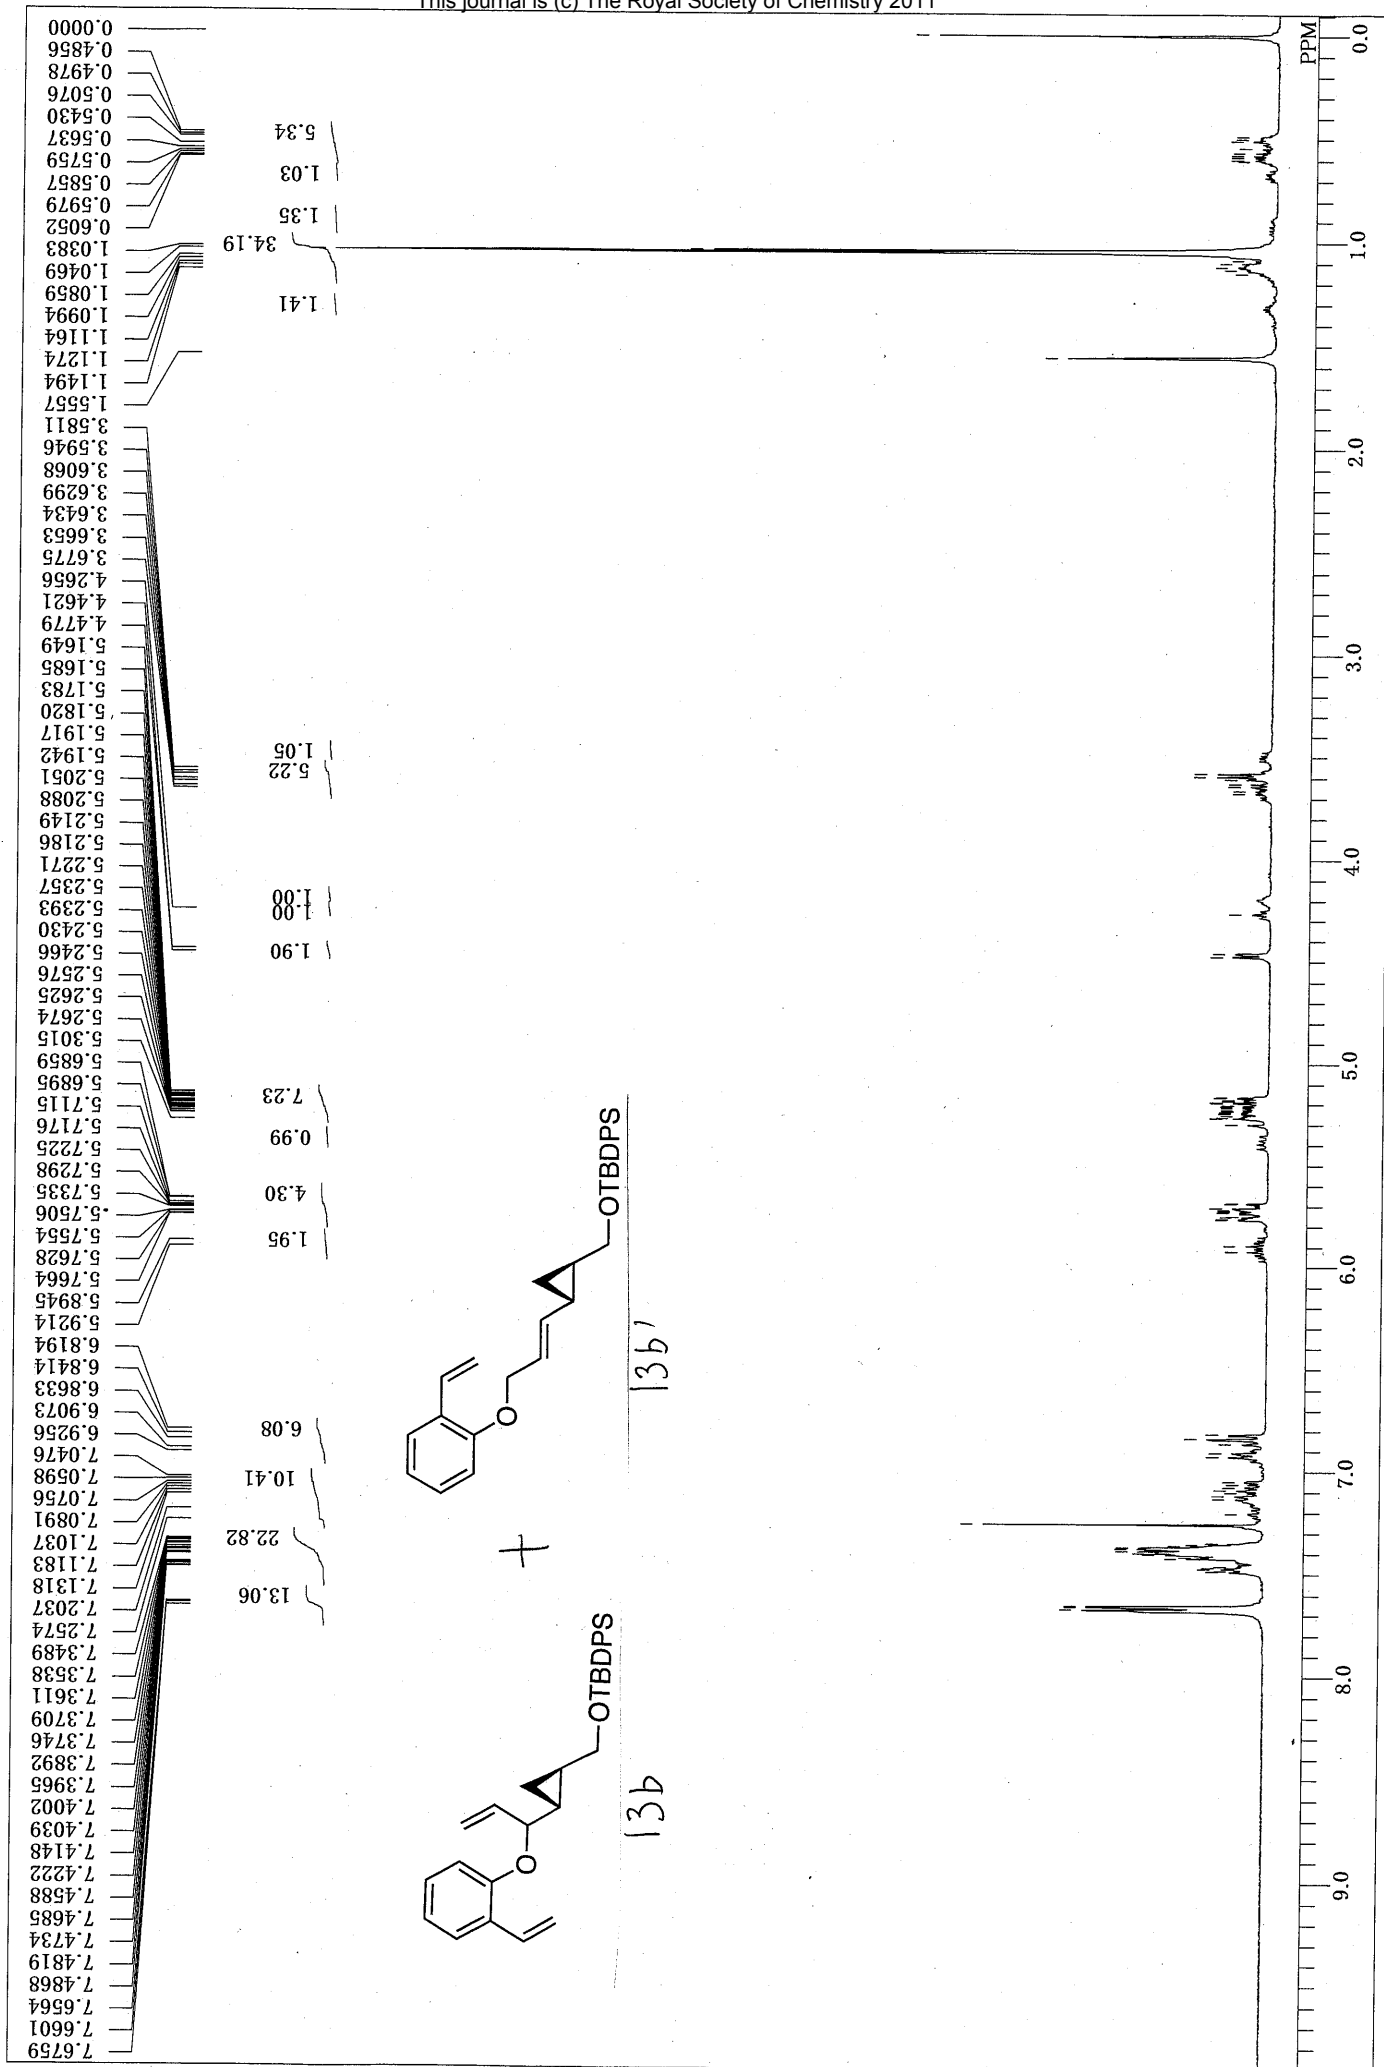

07KT5-78-1C(500, CDCl3)

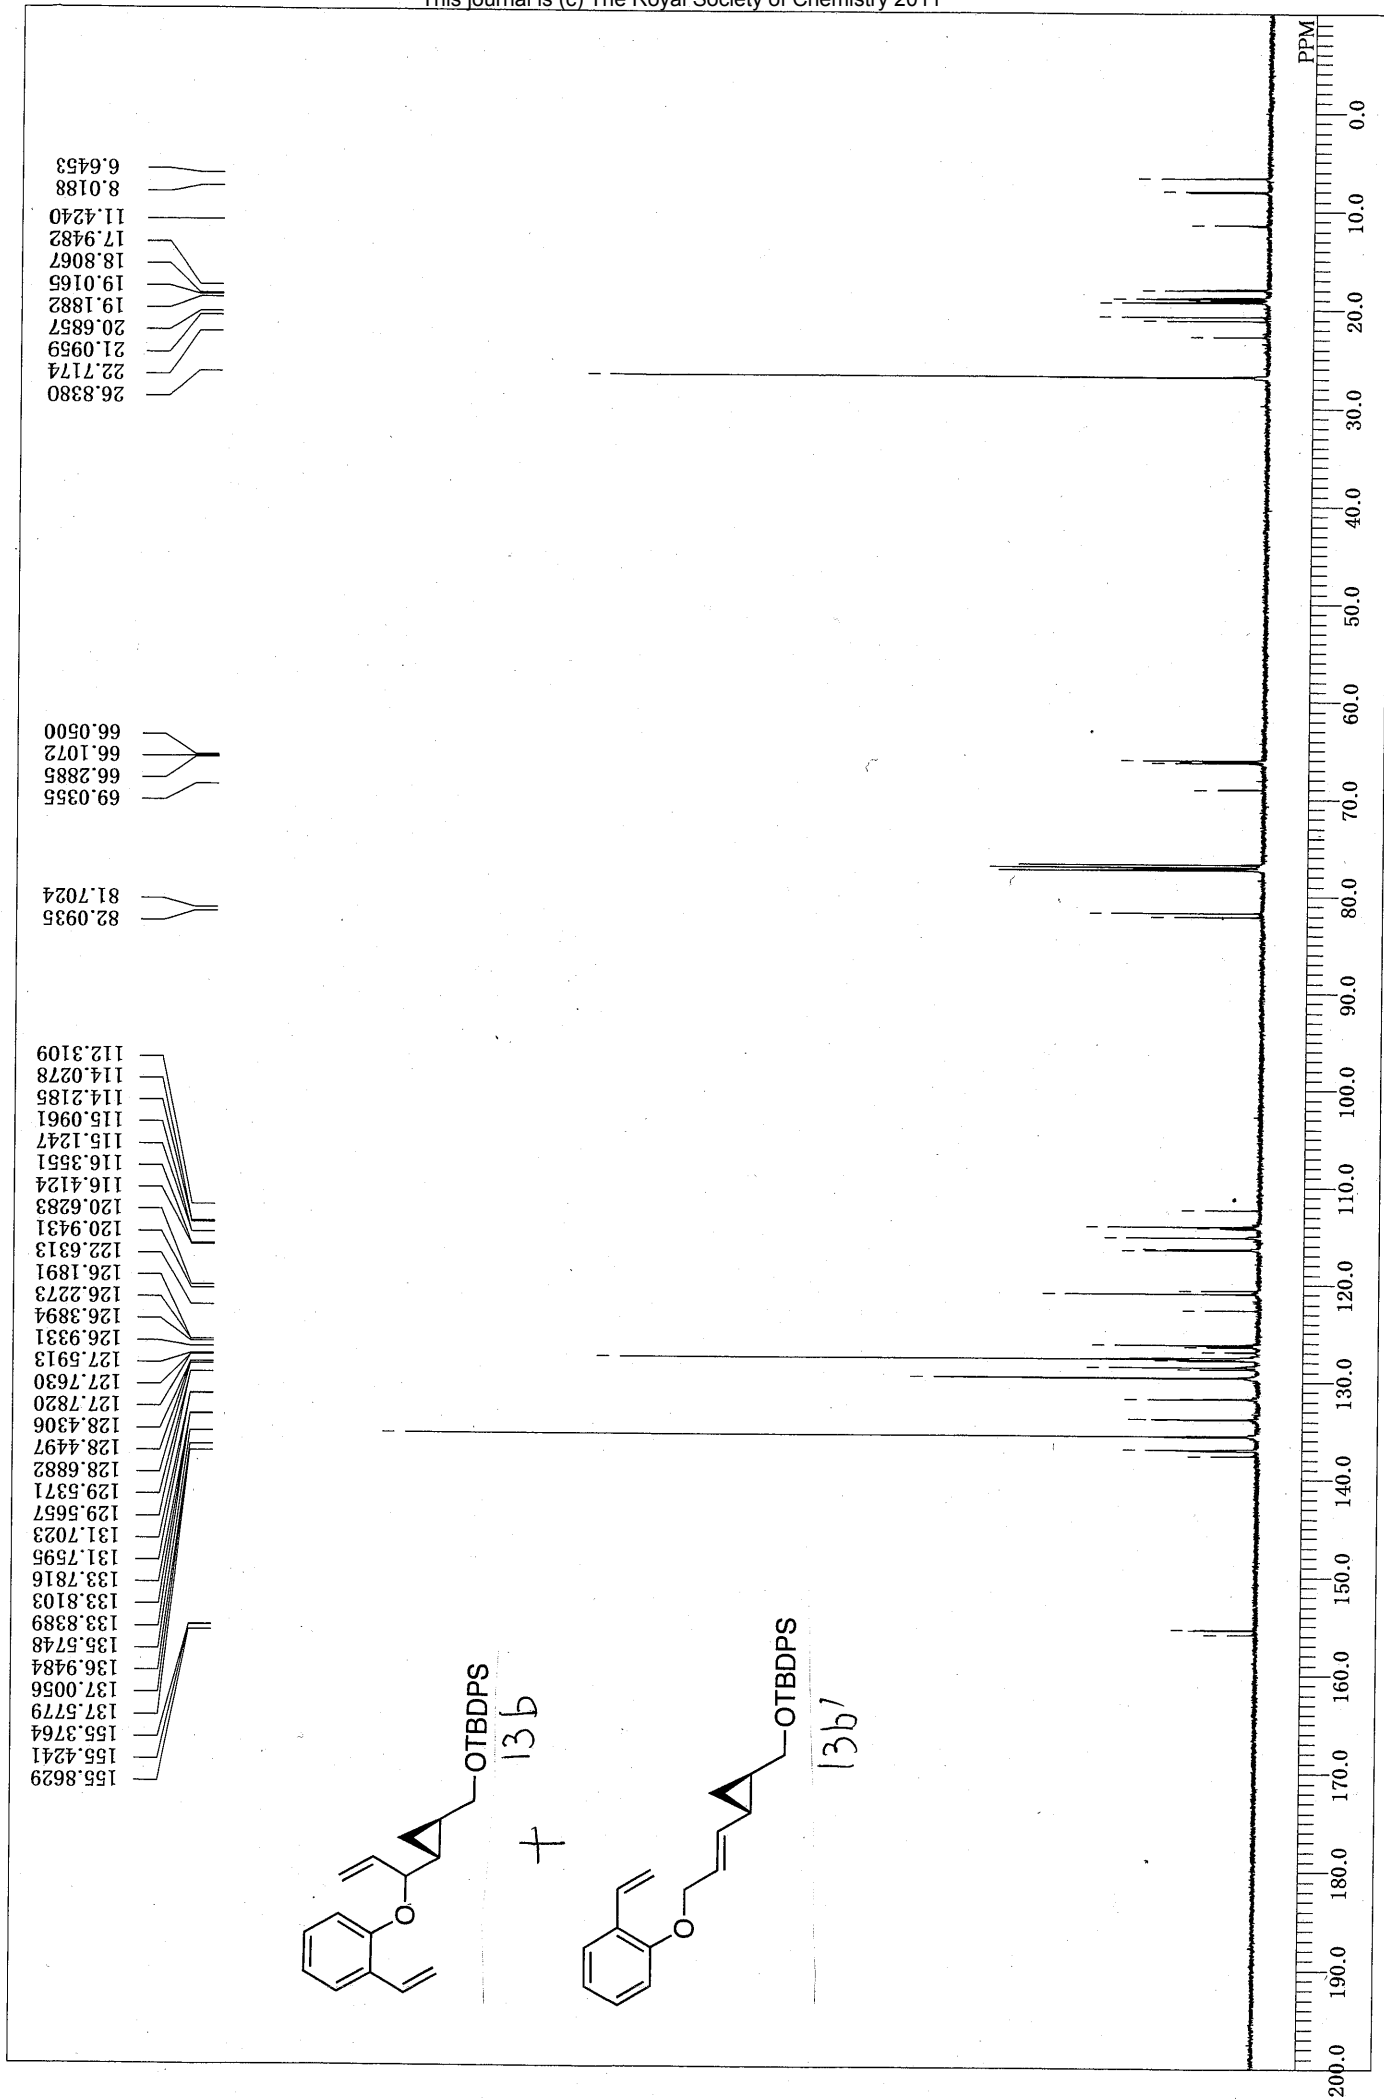

07KT7-13-1(500,CDCl3)

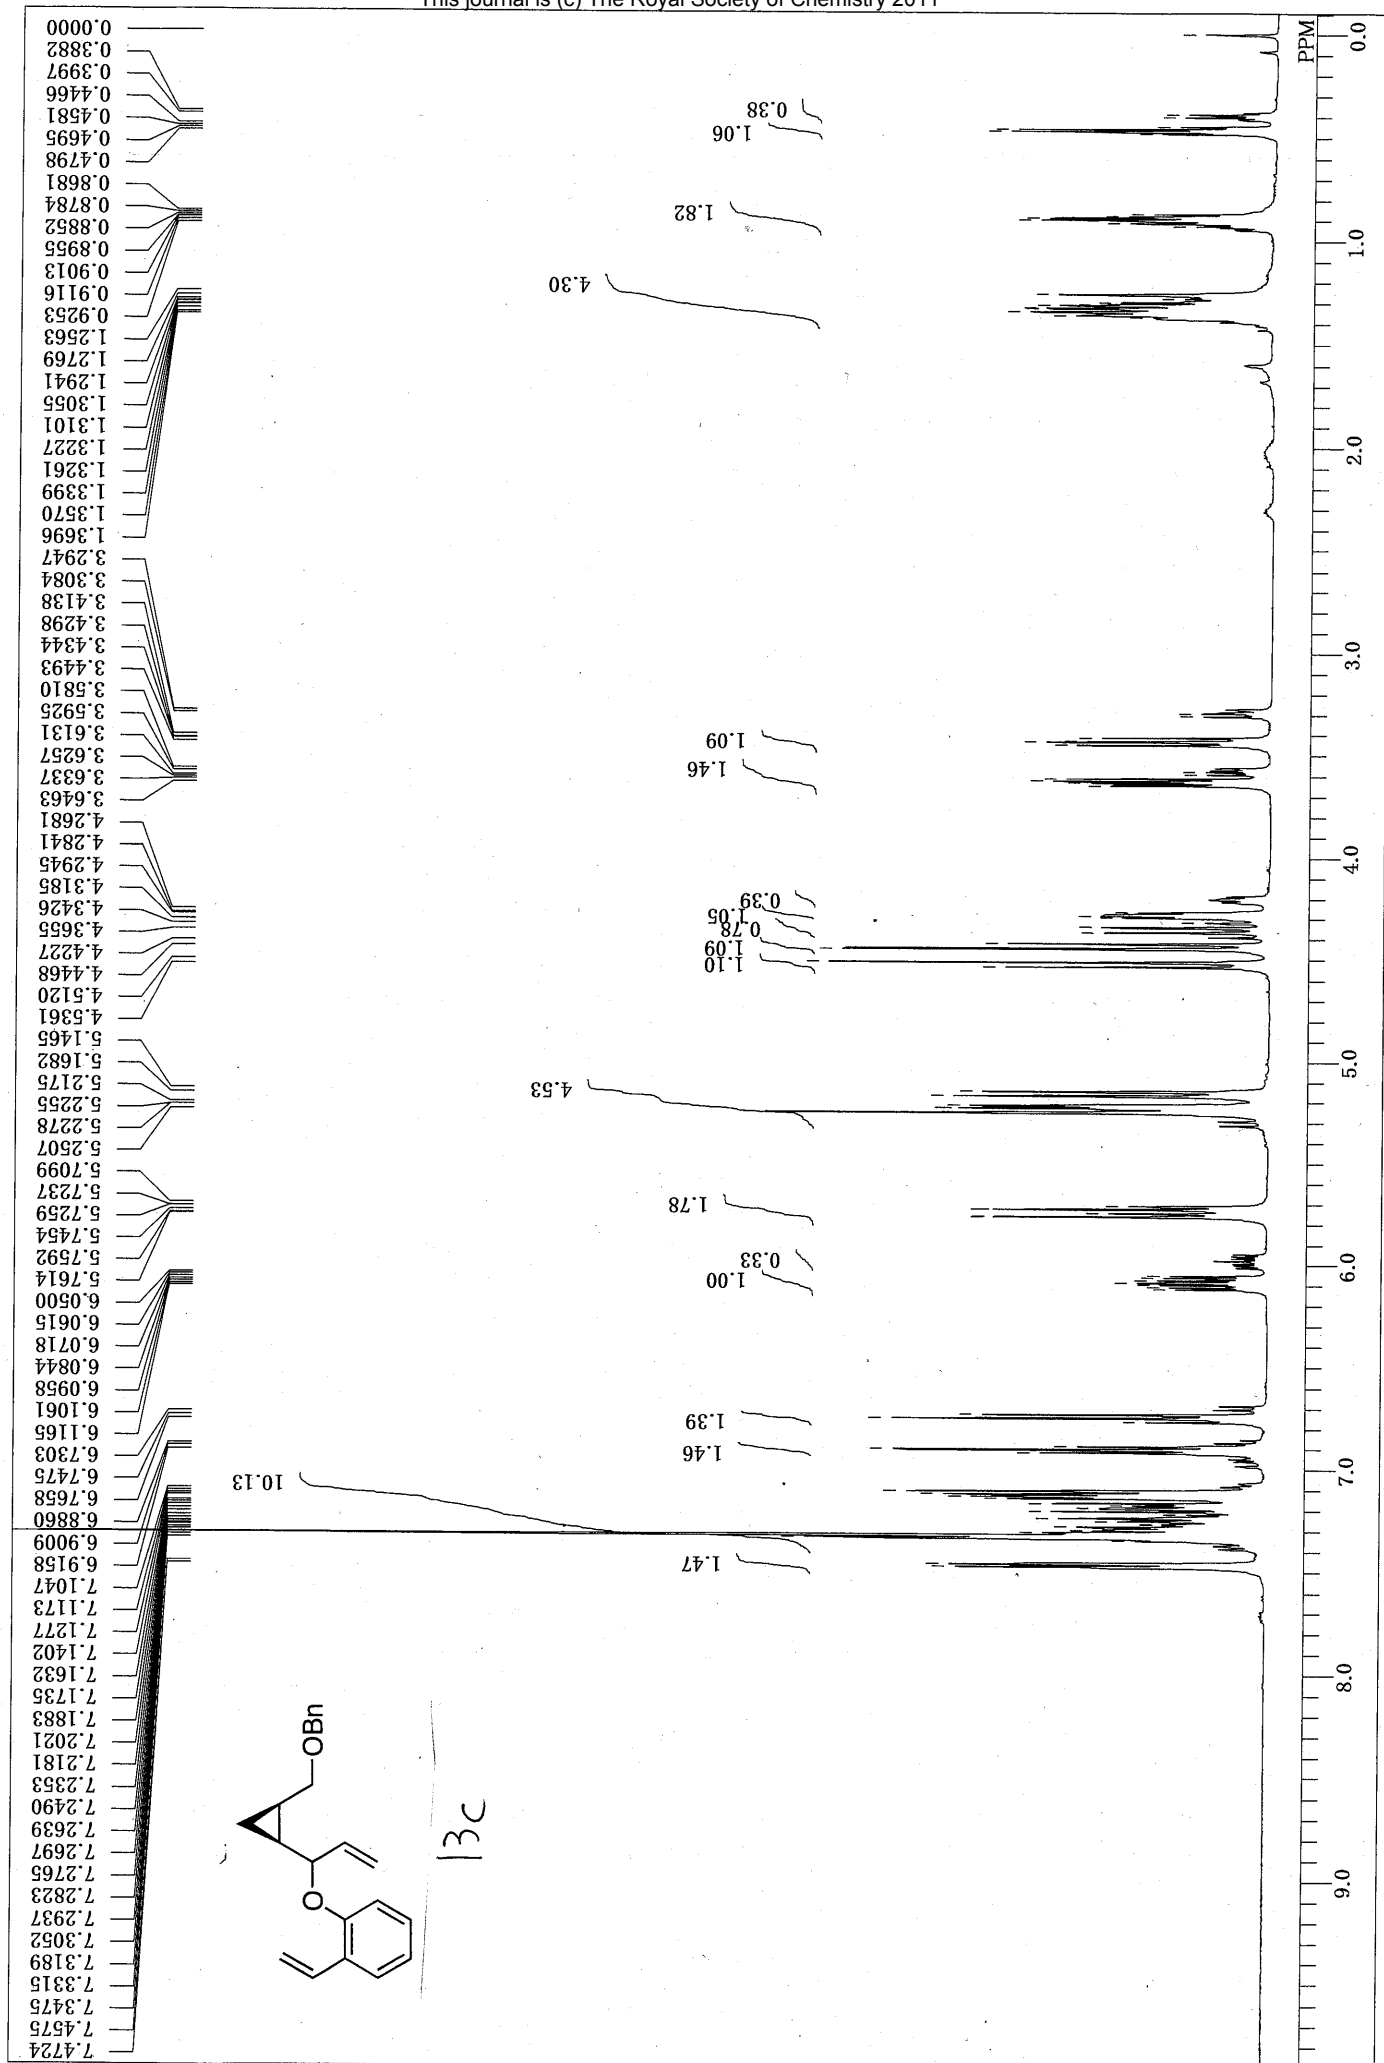

07KT7-13-1C (400, CD3OD)

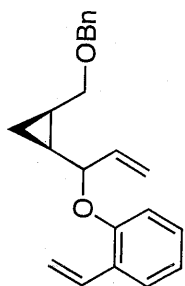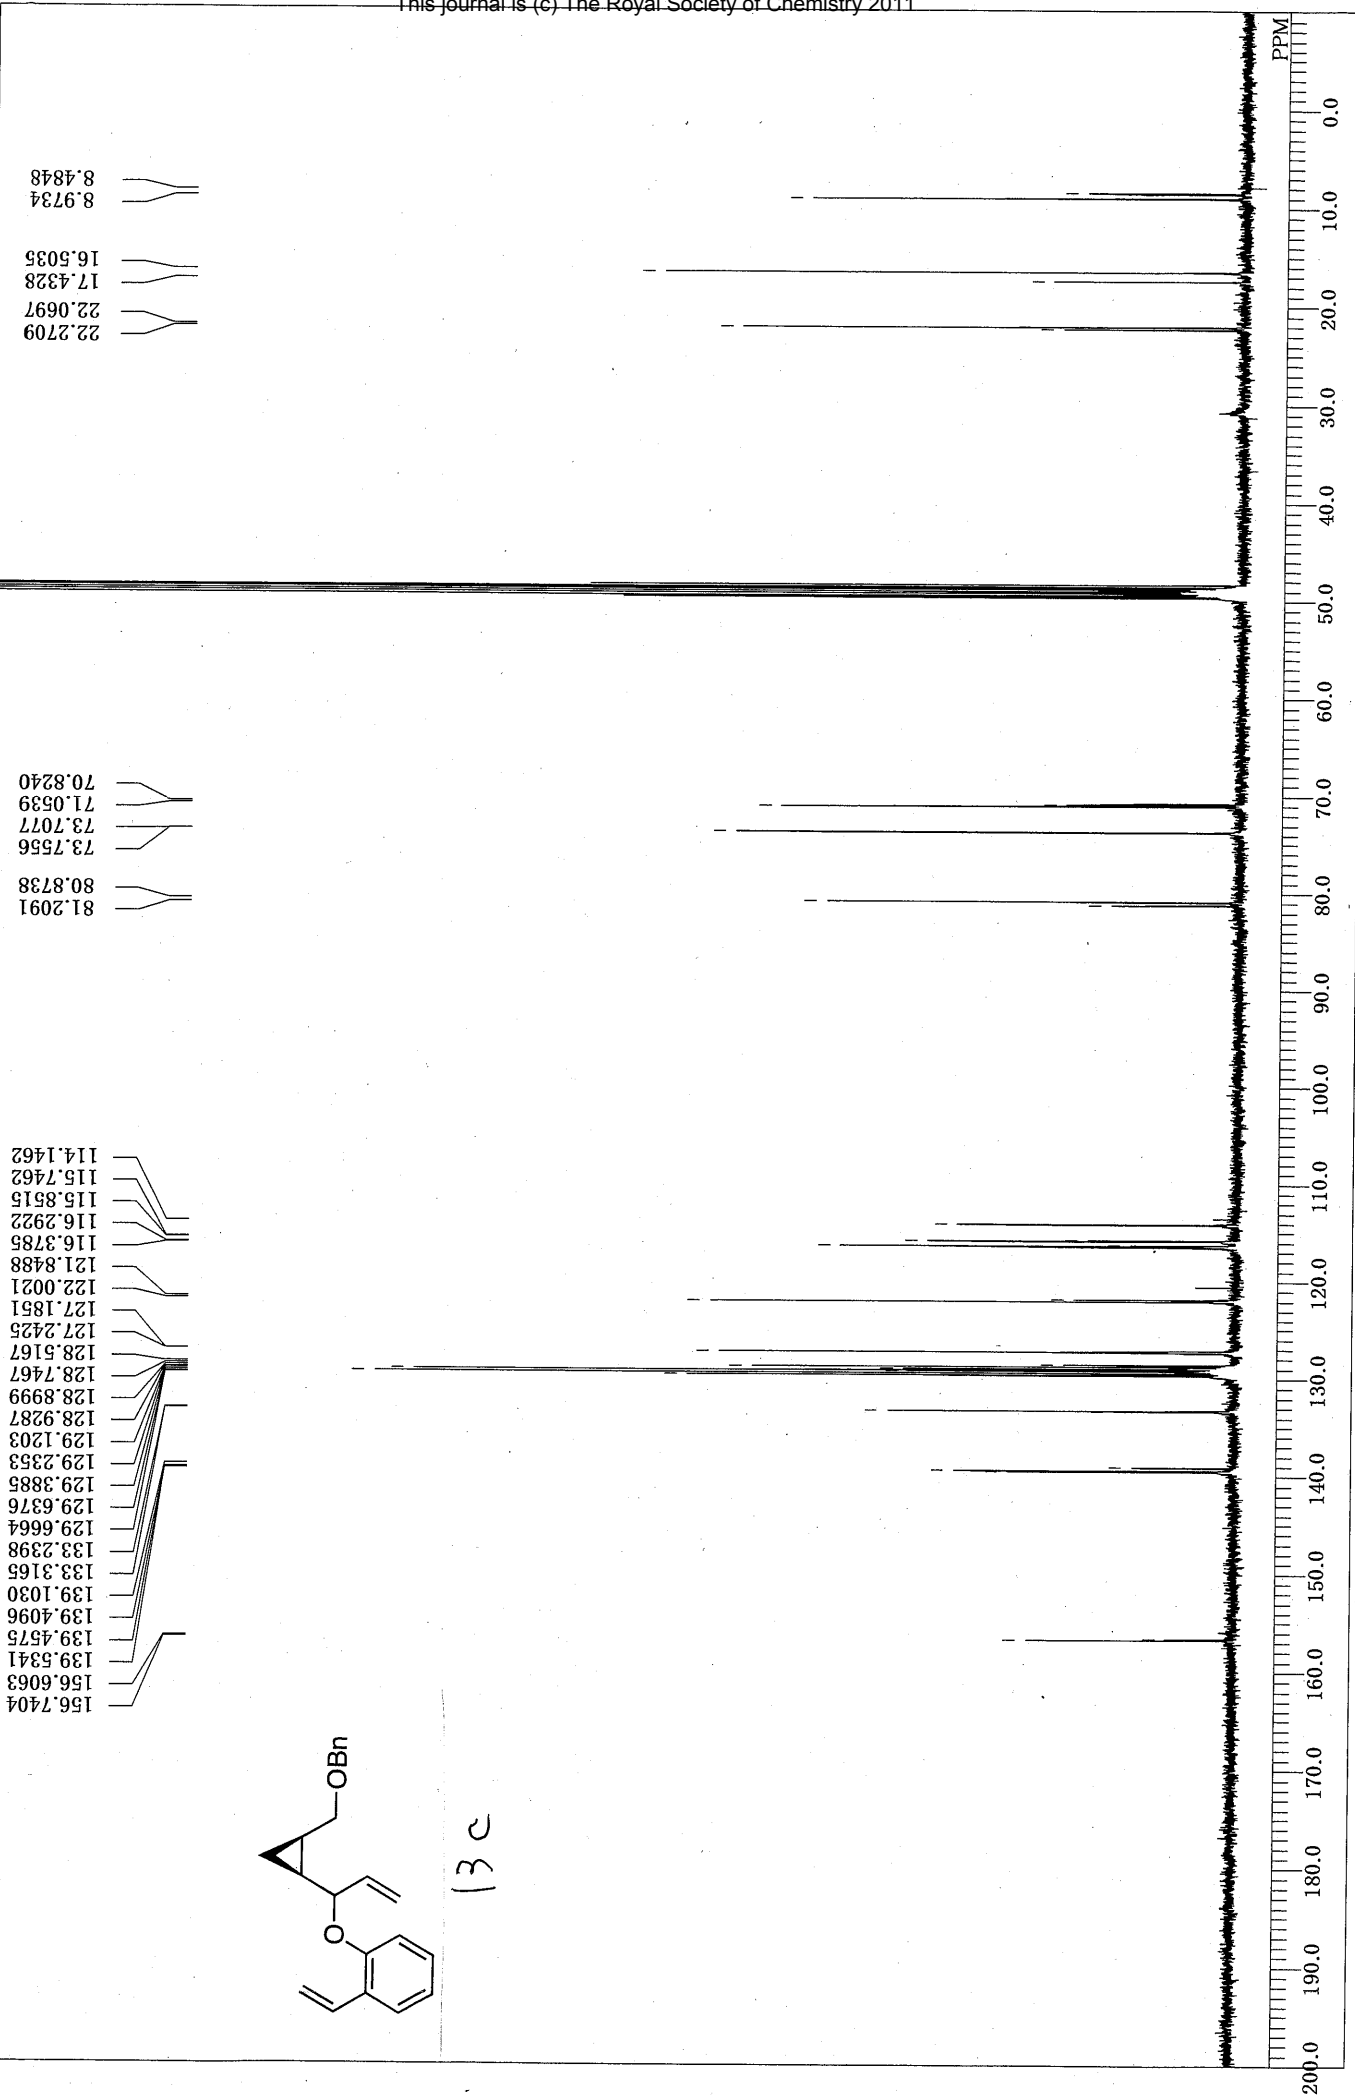

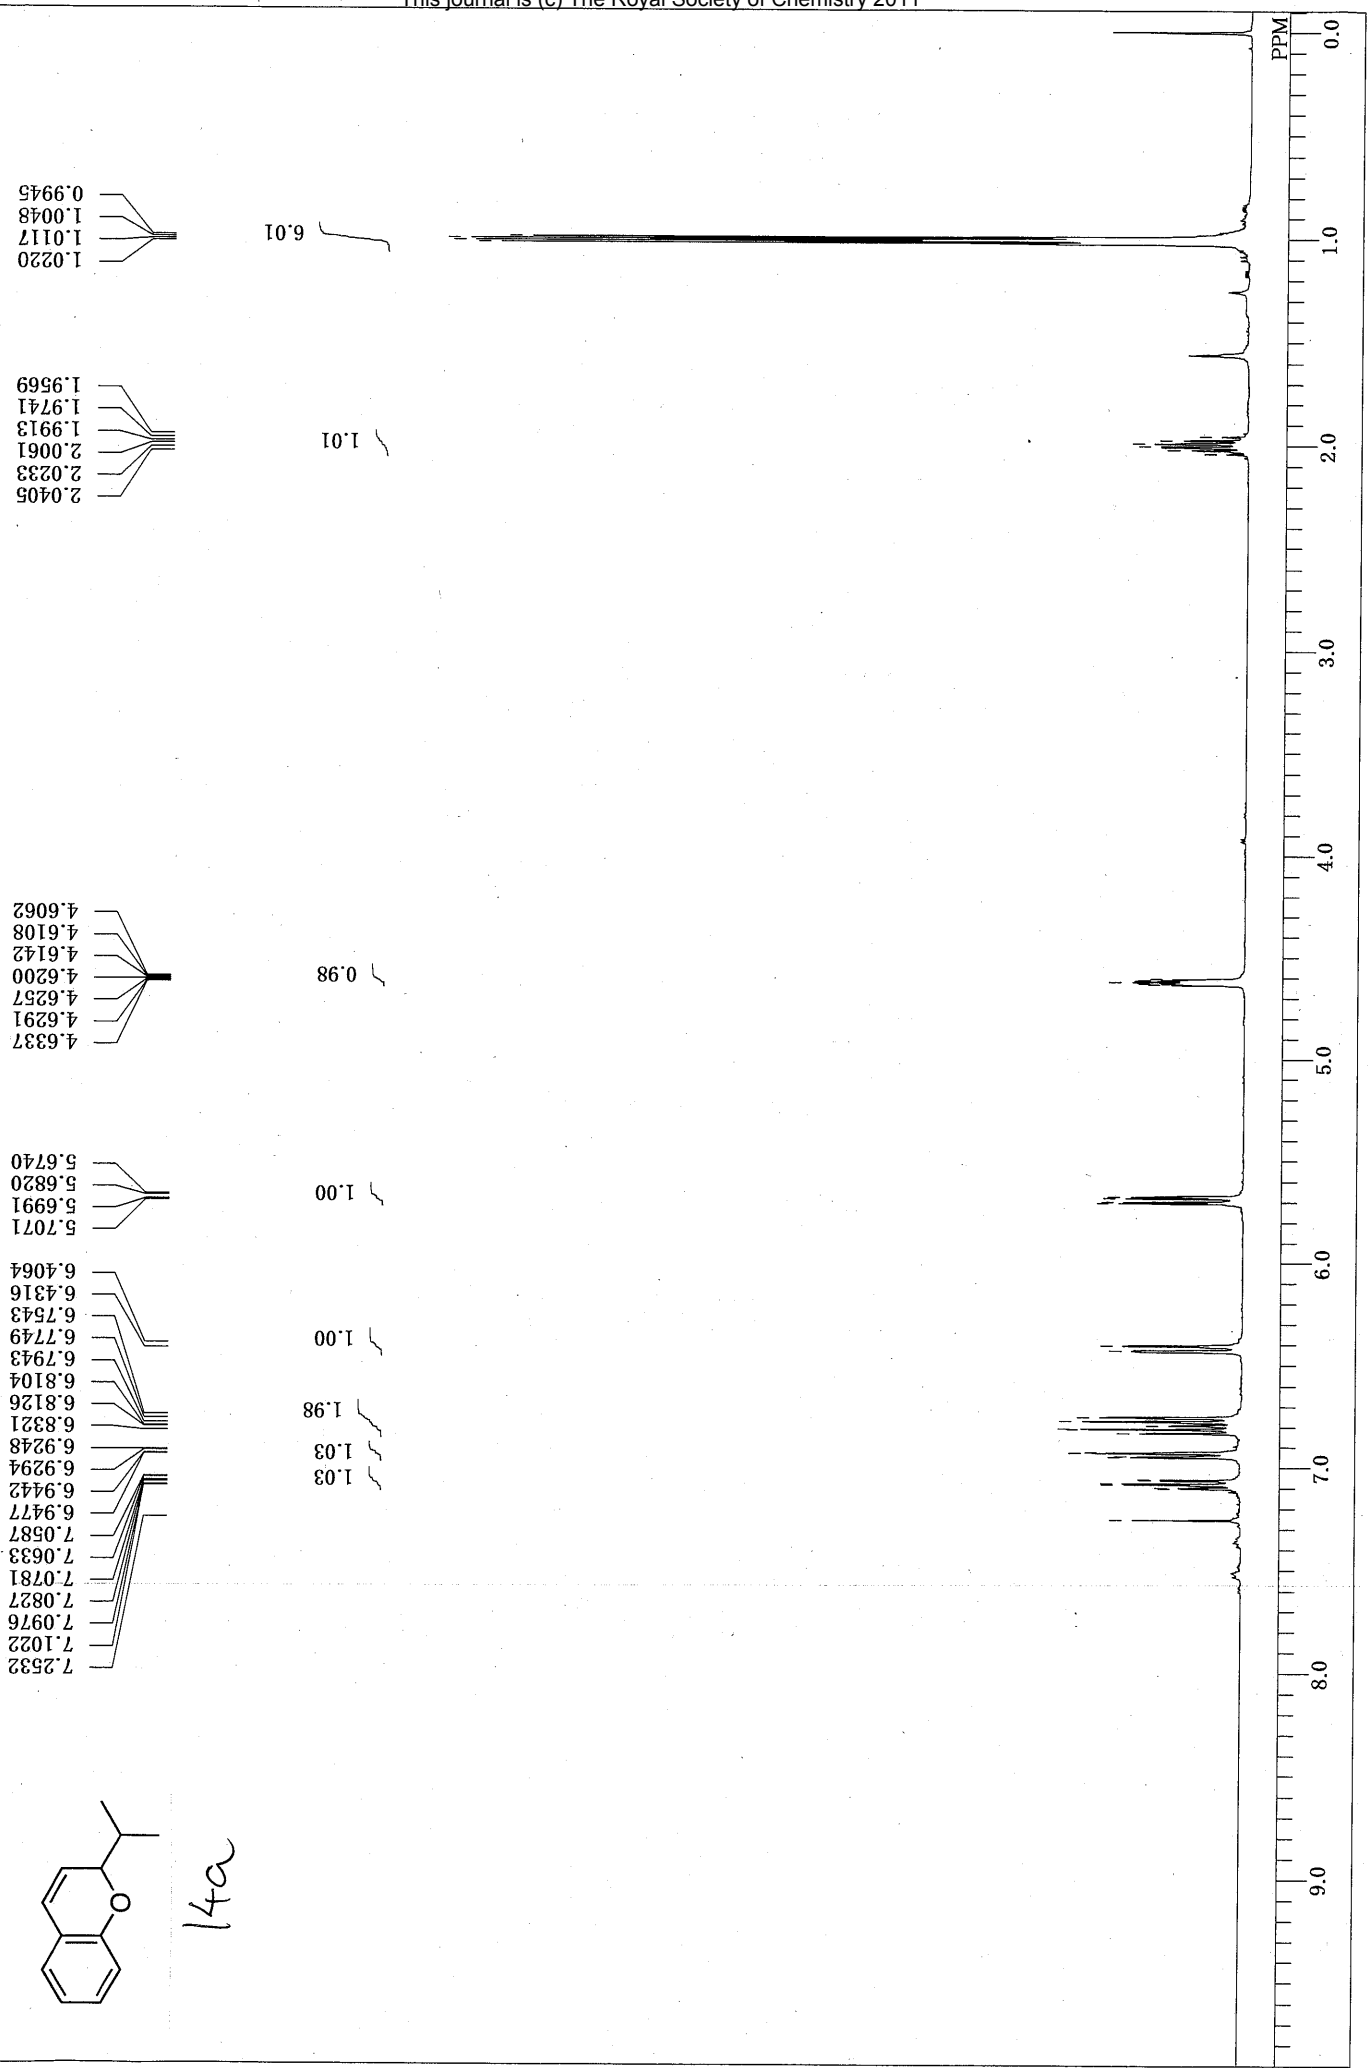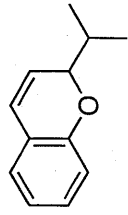

14a



07KT5-84-2C(400, CDCl<sub>3</sub>)

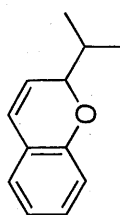

14a

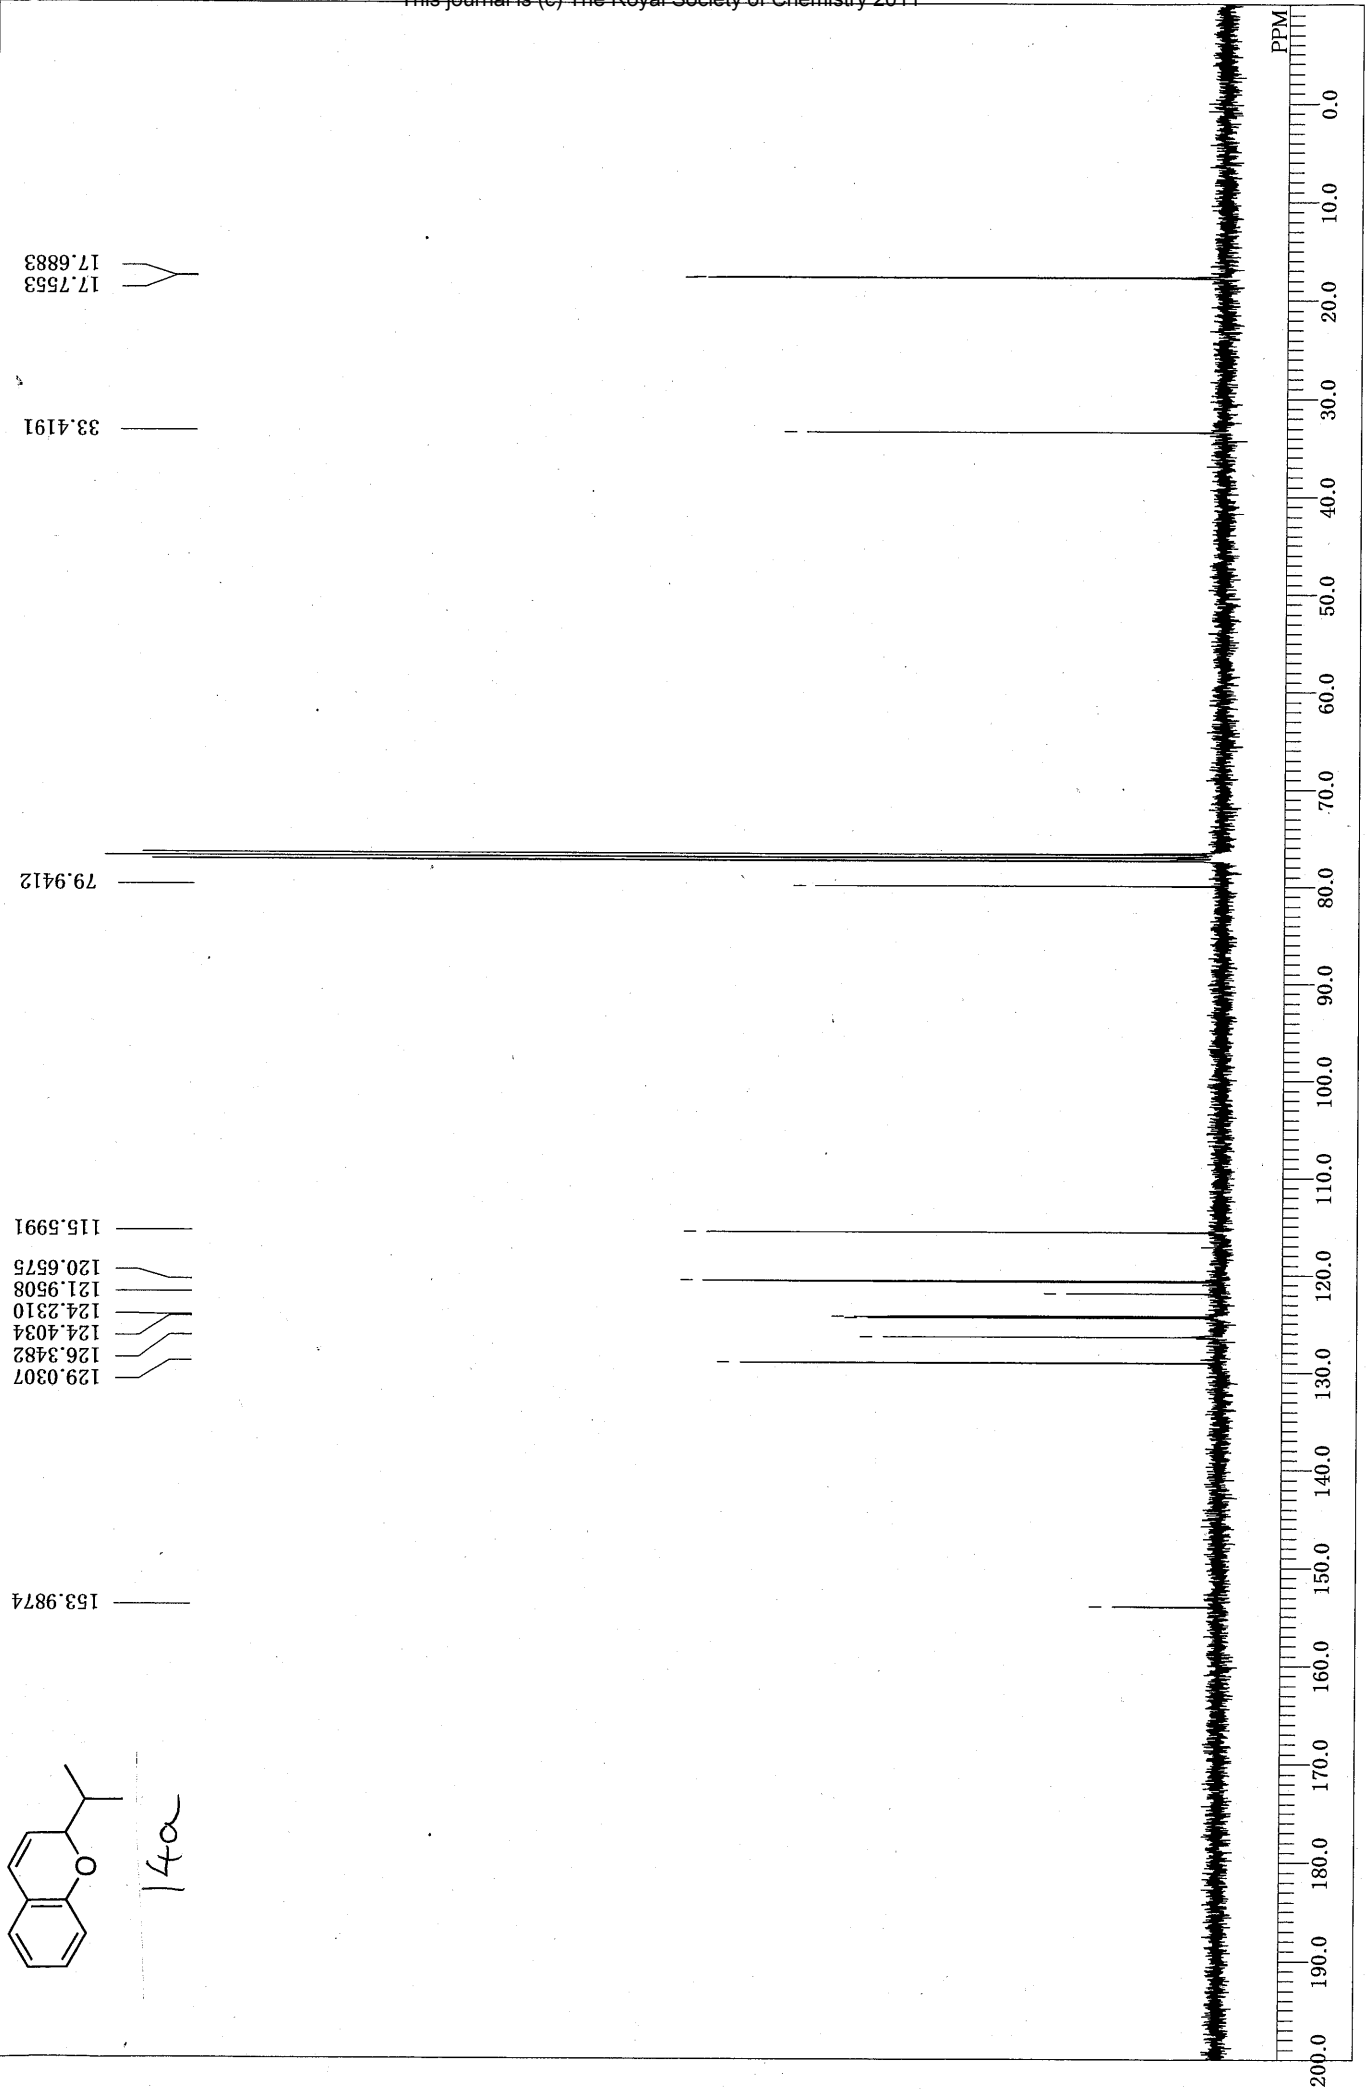

07KT5-82-2(400, CDCl3)

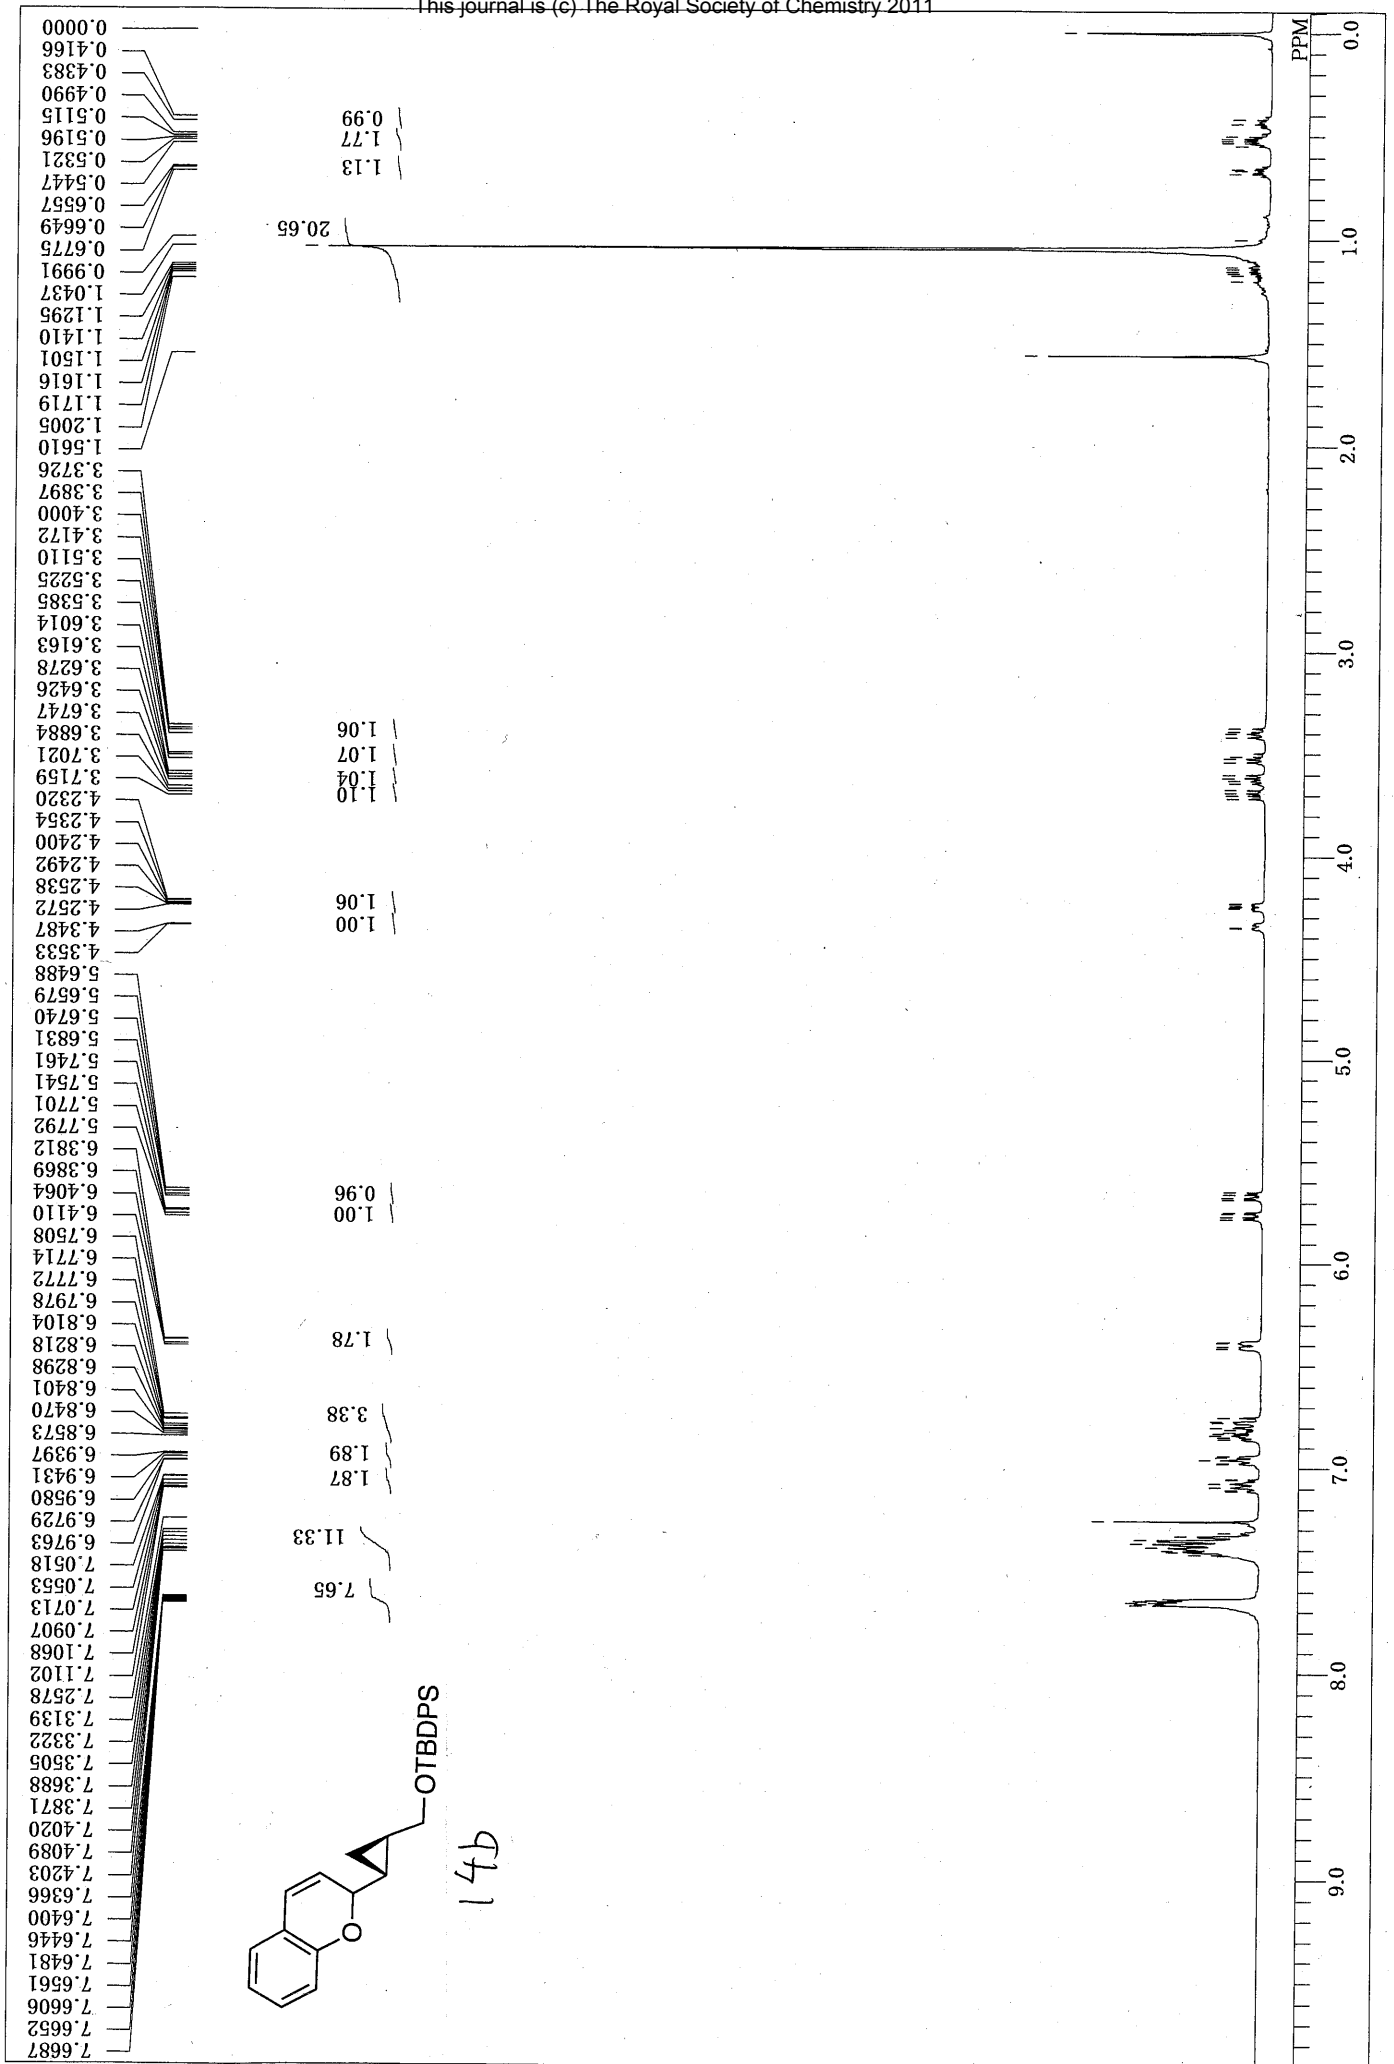

07KT5-82-1C(500, CDCl<sub>3</sub>)

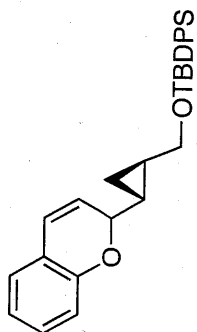

14b

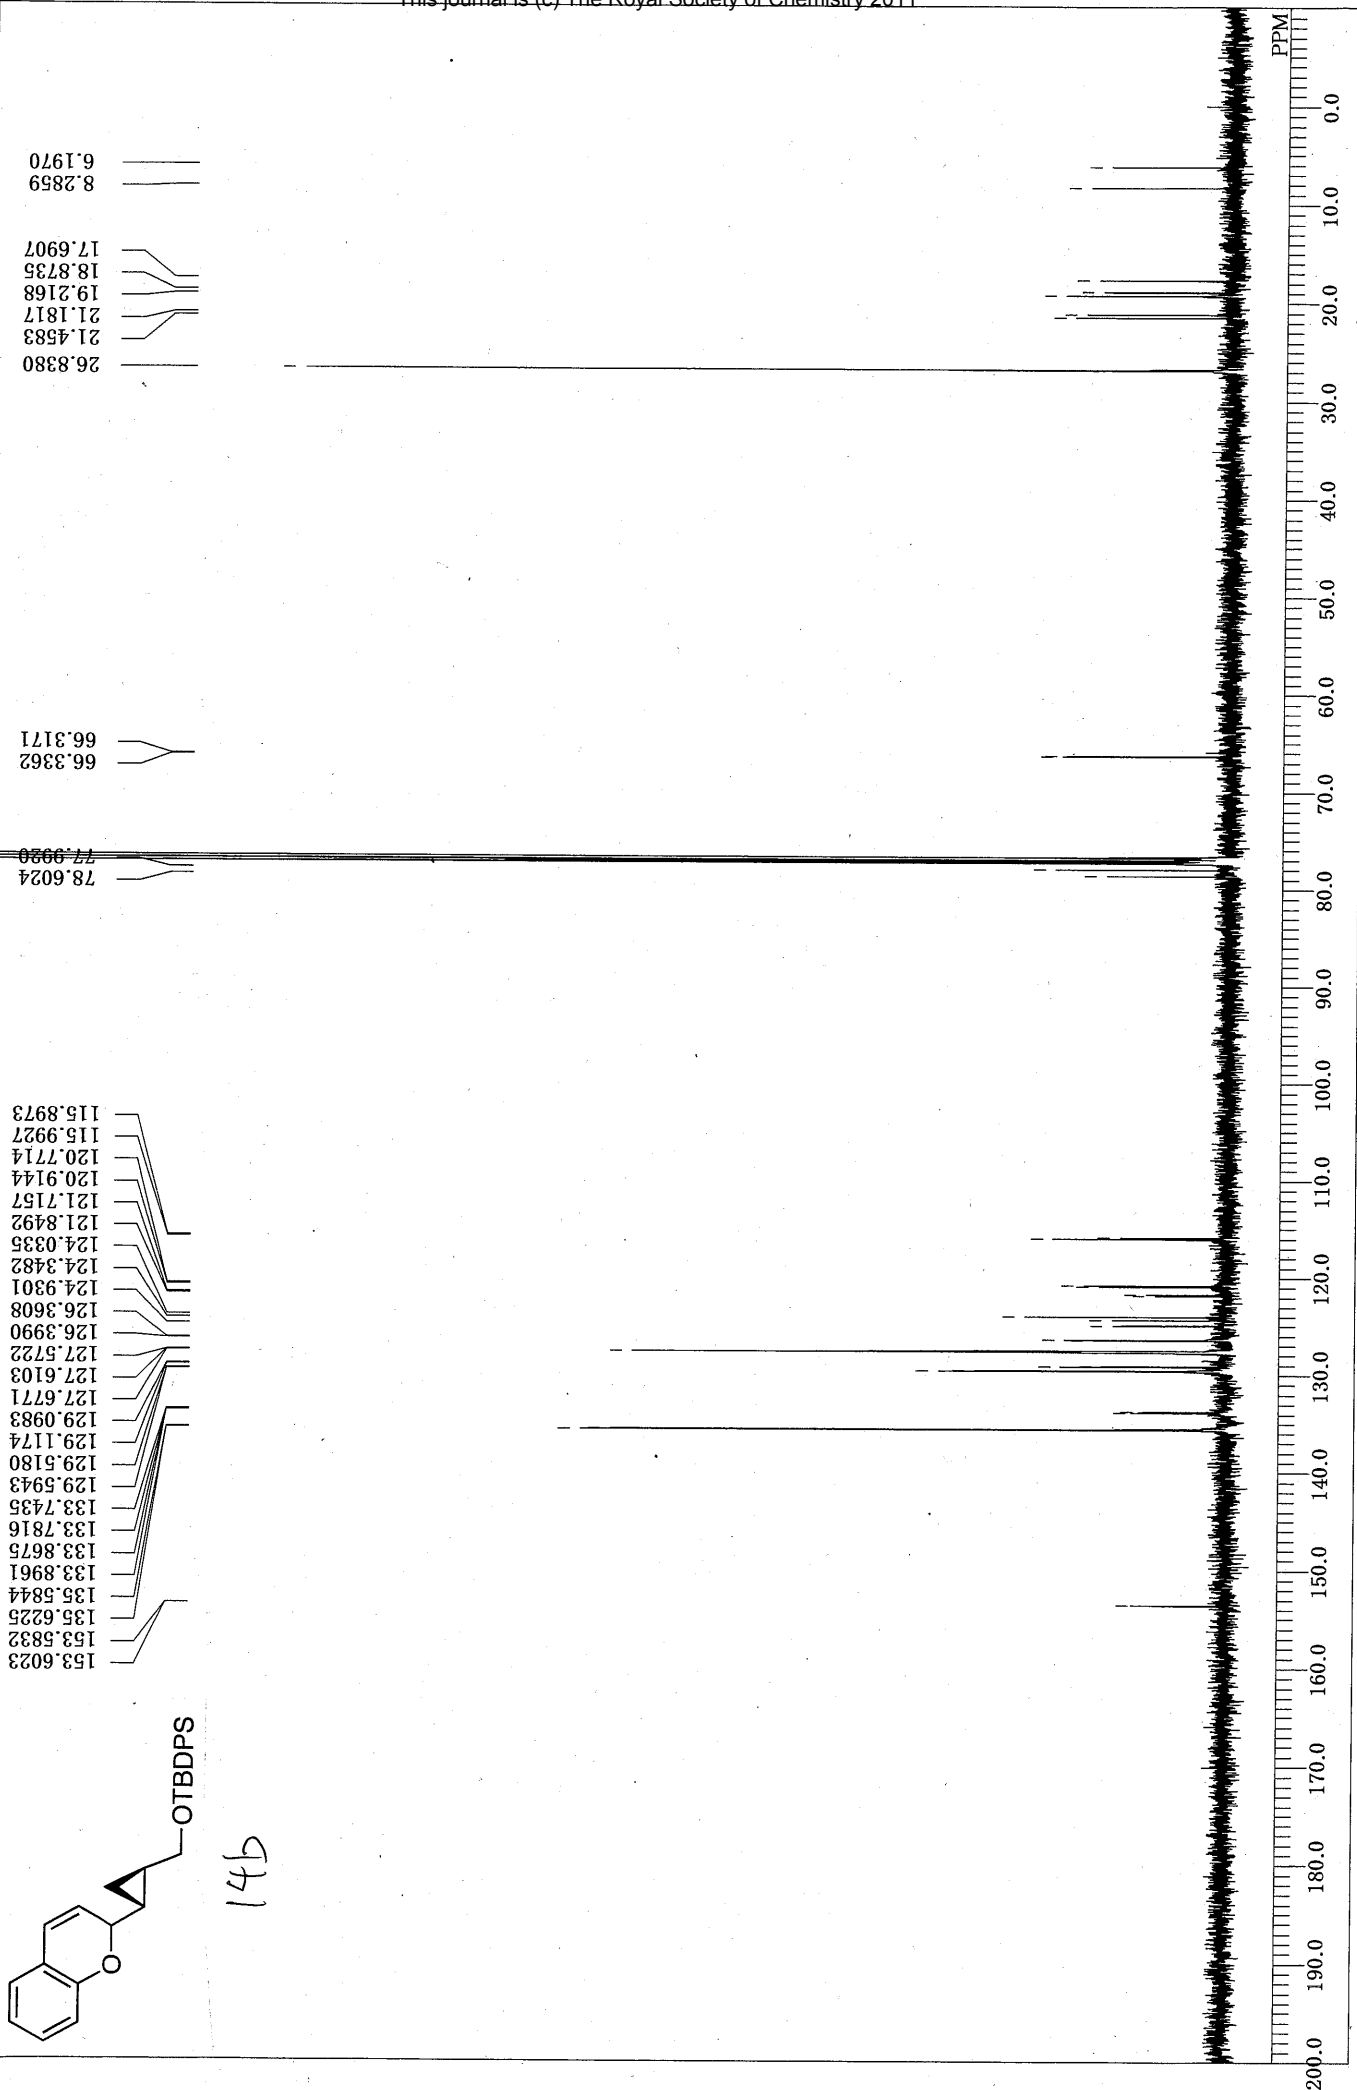

07KT7-18-1(500, CDCl3)

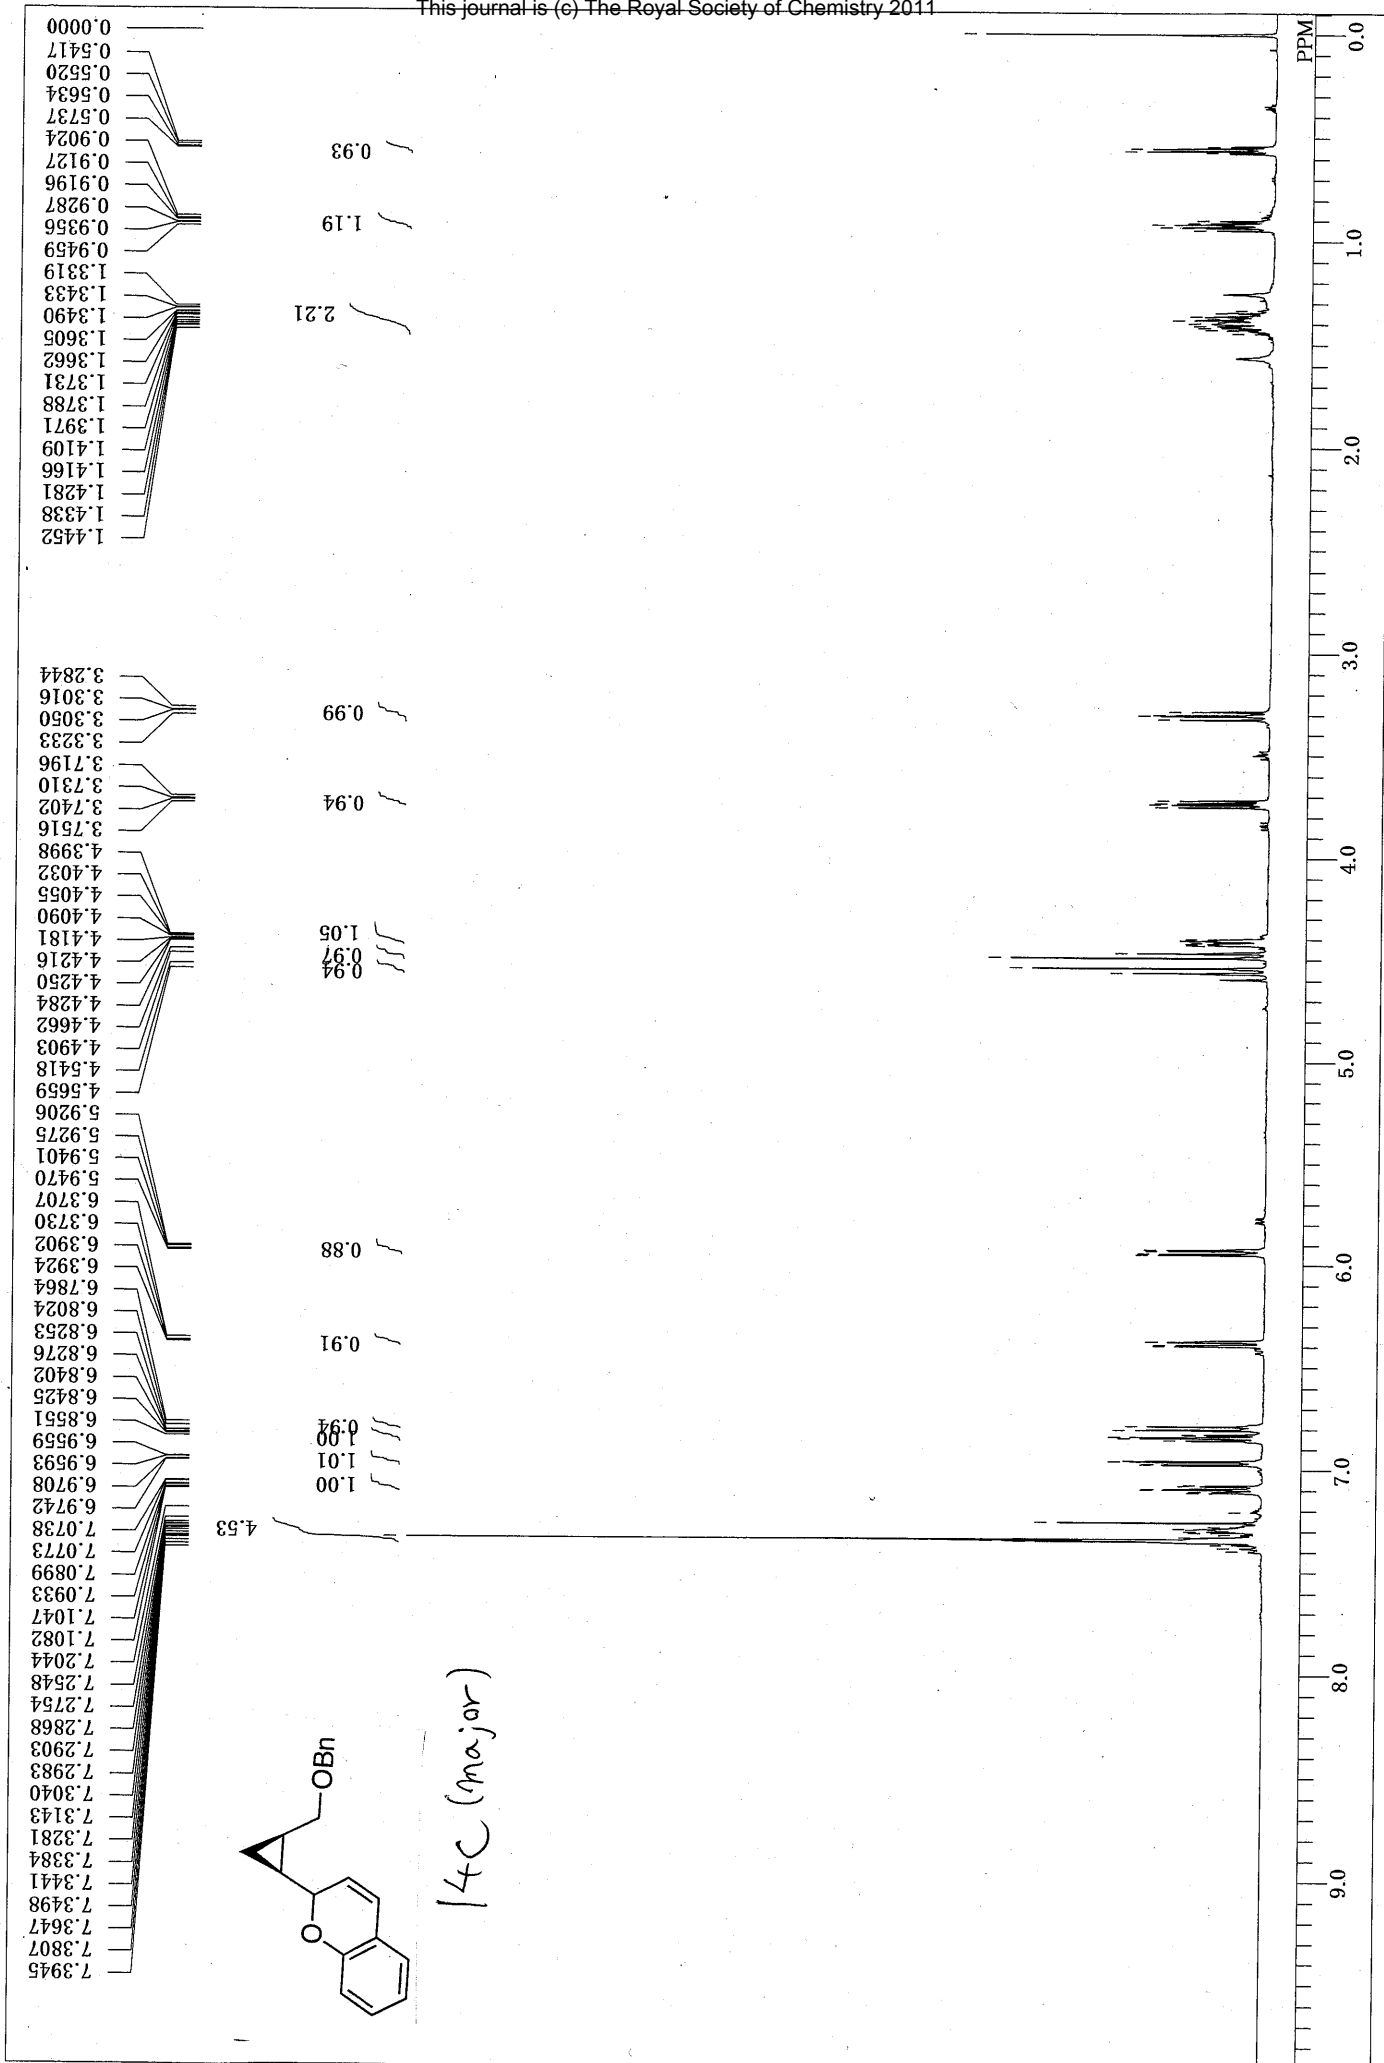

07KT7-18-1C(500, CDCI3)

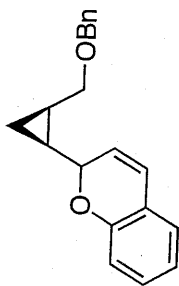

*14C (major)*

8.7914  
15.3538  
20.6190  
76.2083  
72.9271  
70.3232

116.0117  
120.9621  
121.9827  
123.3658  
126.3799  
127.6867  
127.7820  
128.4211  
128.9934  
138.1120  
153.4974

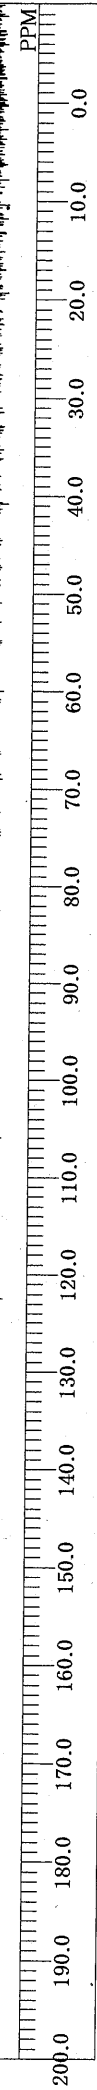

07KT7-18-2a(500,CDCl3)

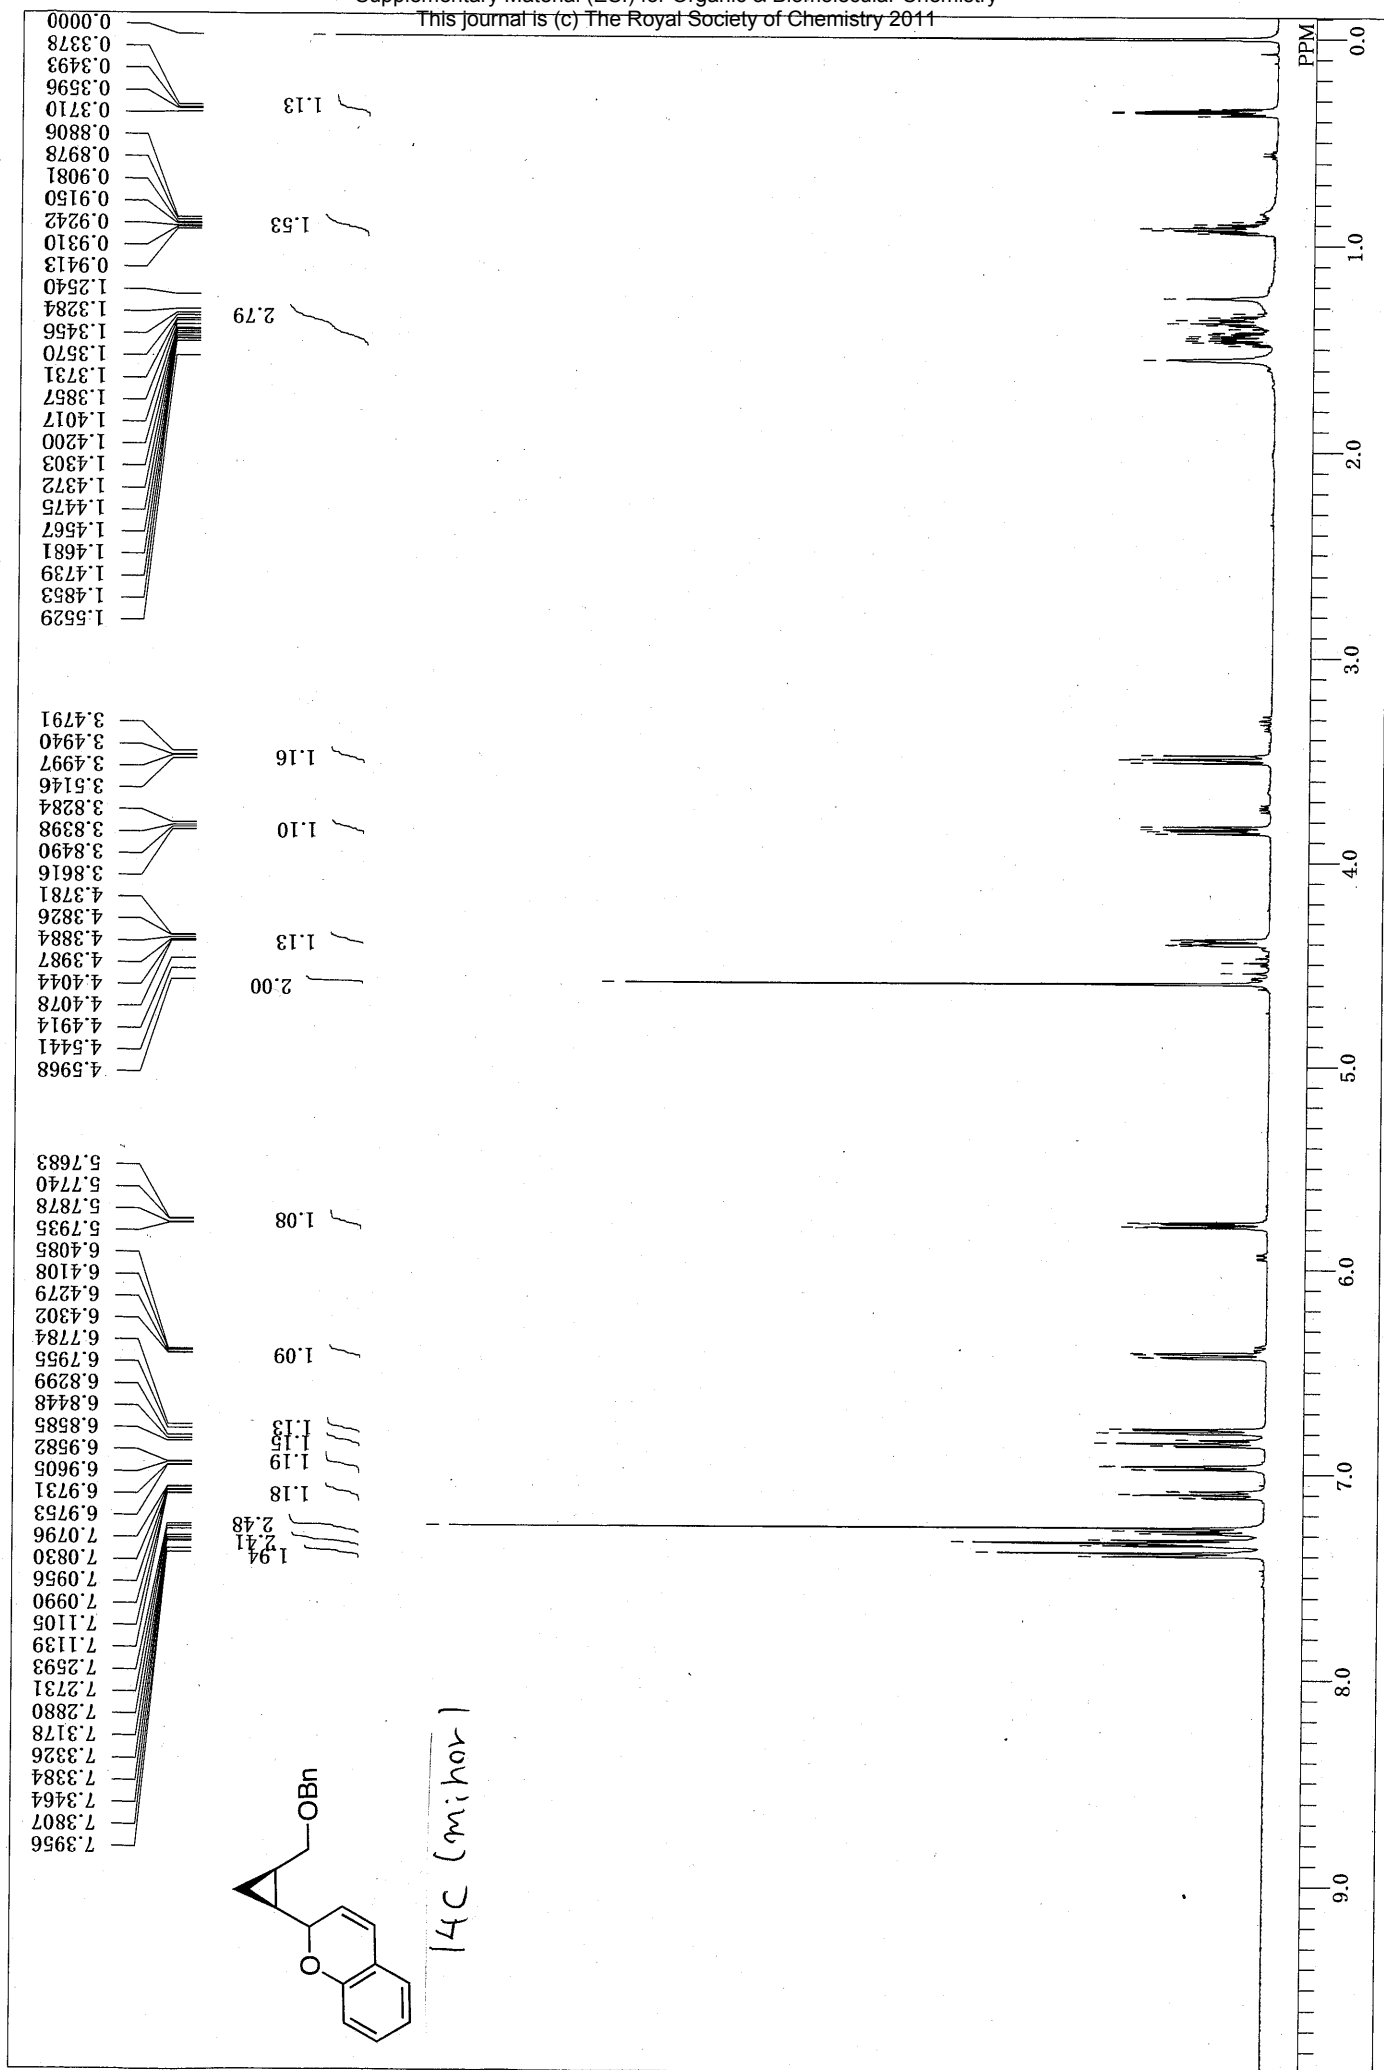

07KT7-18-2aC(500, CDCl3)

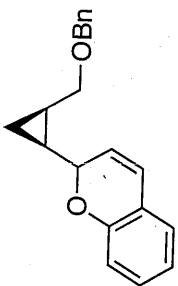

(4c (minor))

7.6182  
16.0596  
20.4091  
69.7318  
72.7554  
75.8936

116.0308  
120.9717  
121.8301  
124.1956  
125.3975  
126.4276  
127.5054  
127.6867  
128.3639  
129.0983  
138.5508  
153.4974

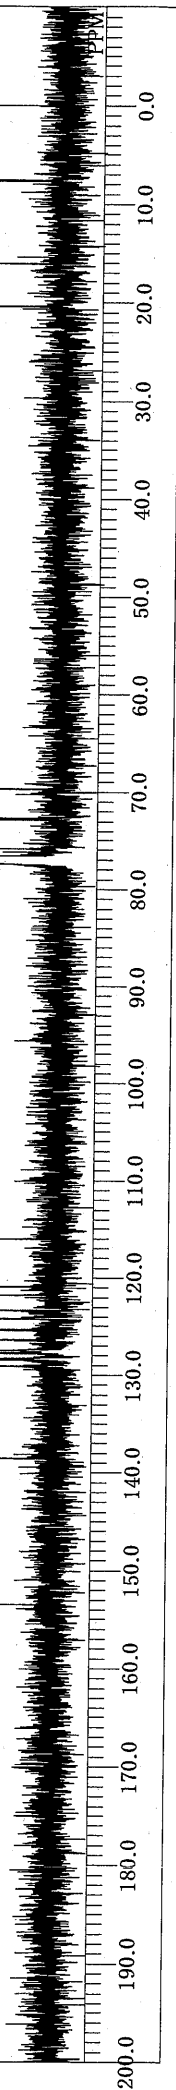

07KT5-19-2(500, CDCl3)

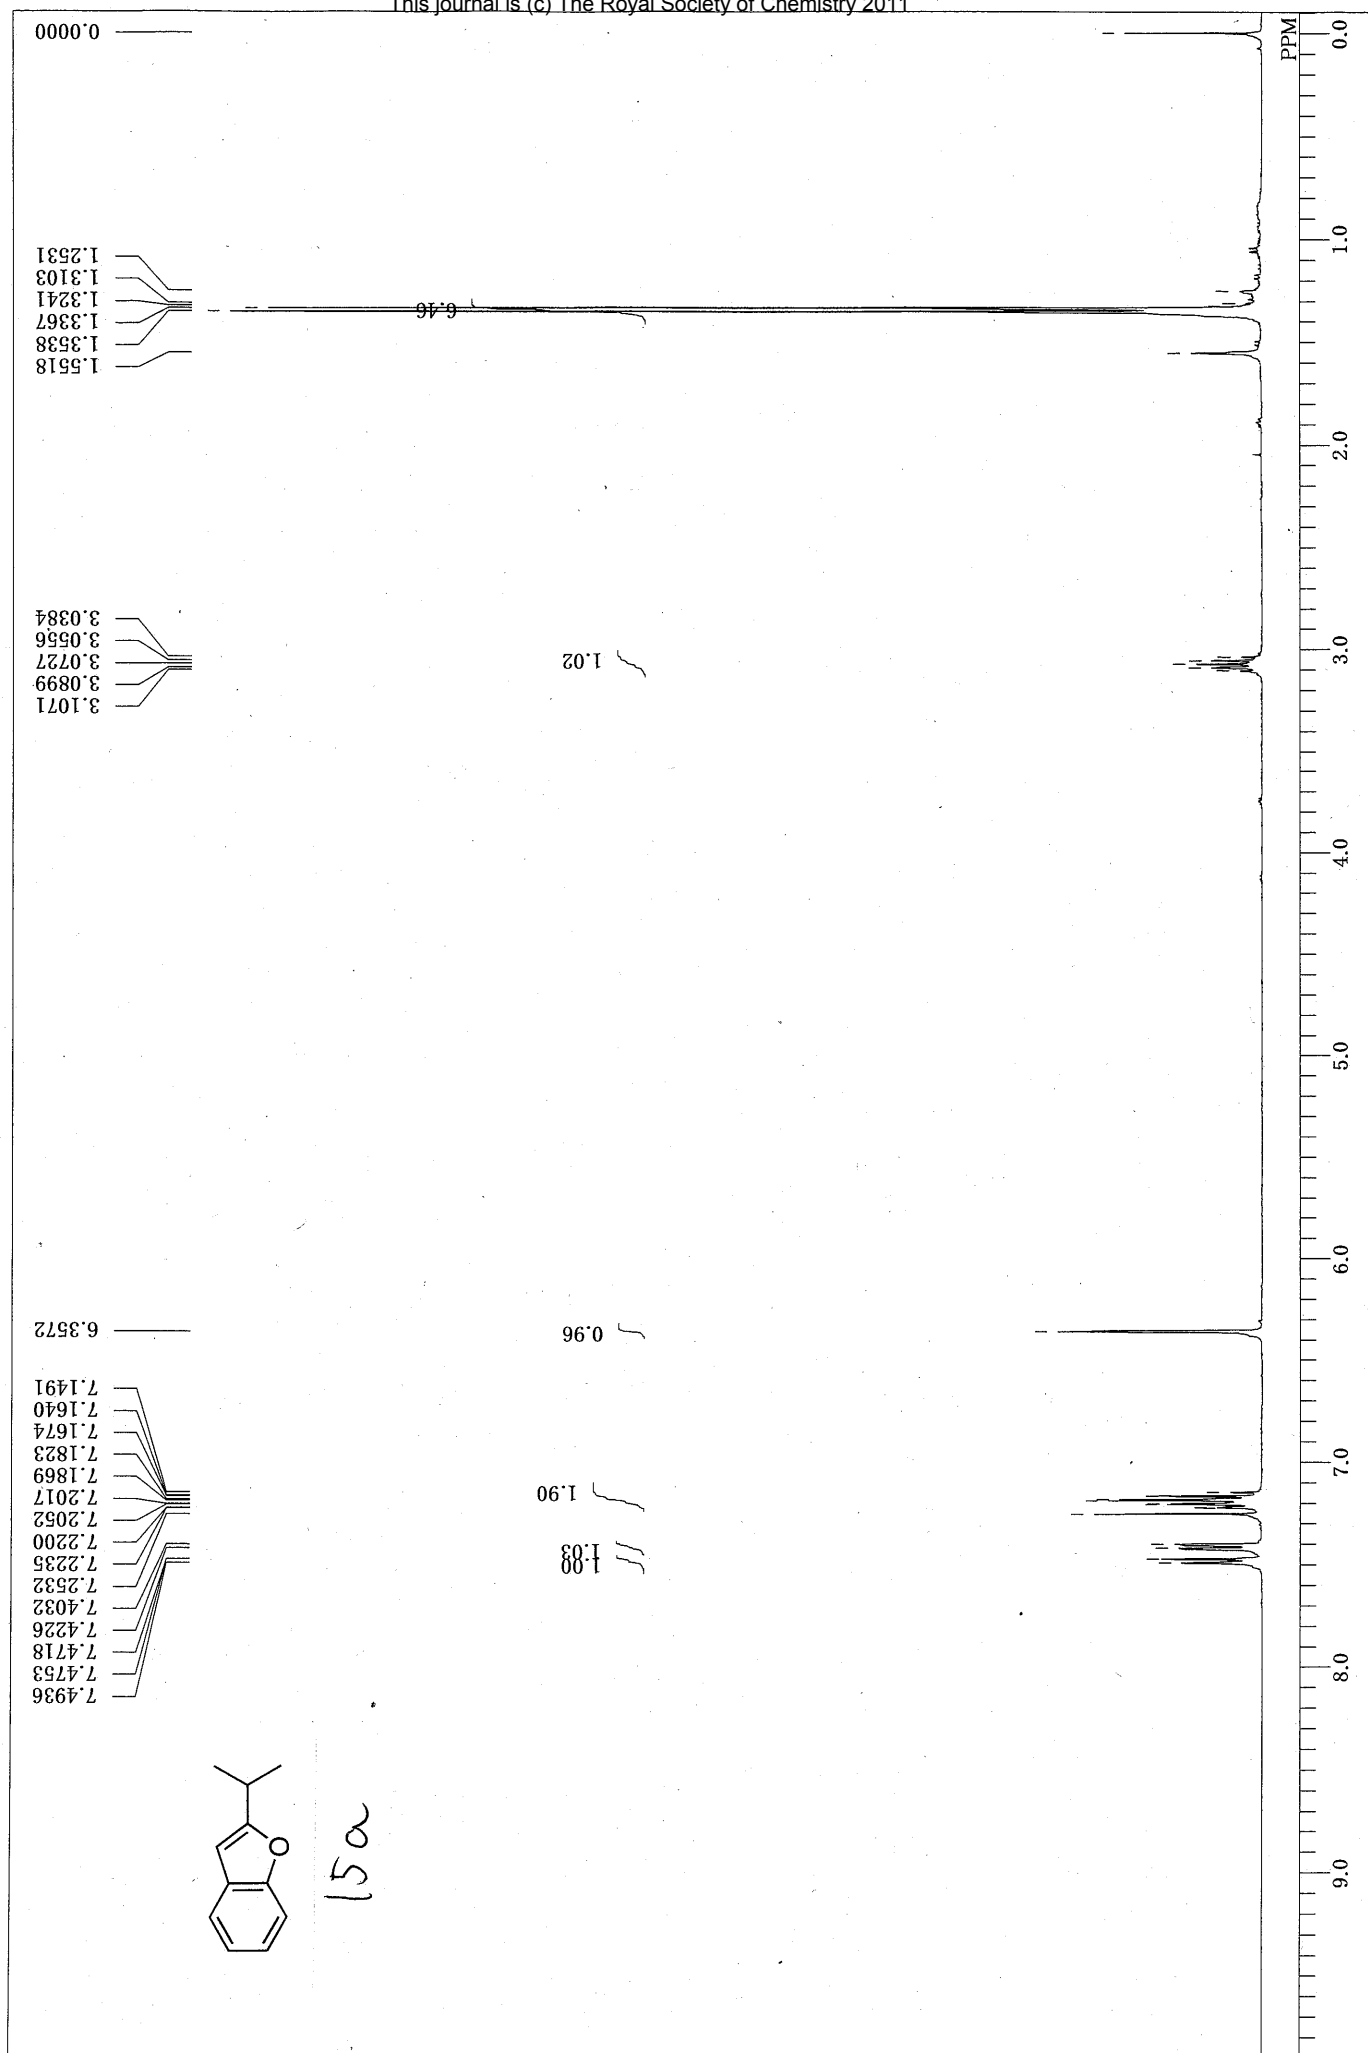



07KT5-38-1a(500, CDCl<sub>3</sub>)

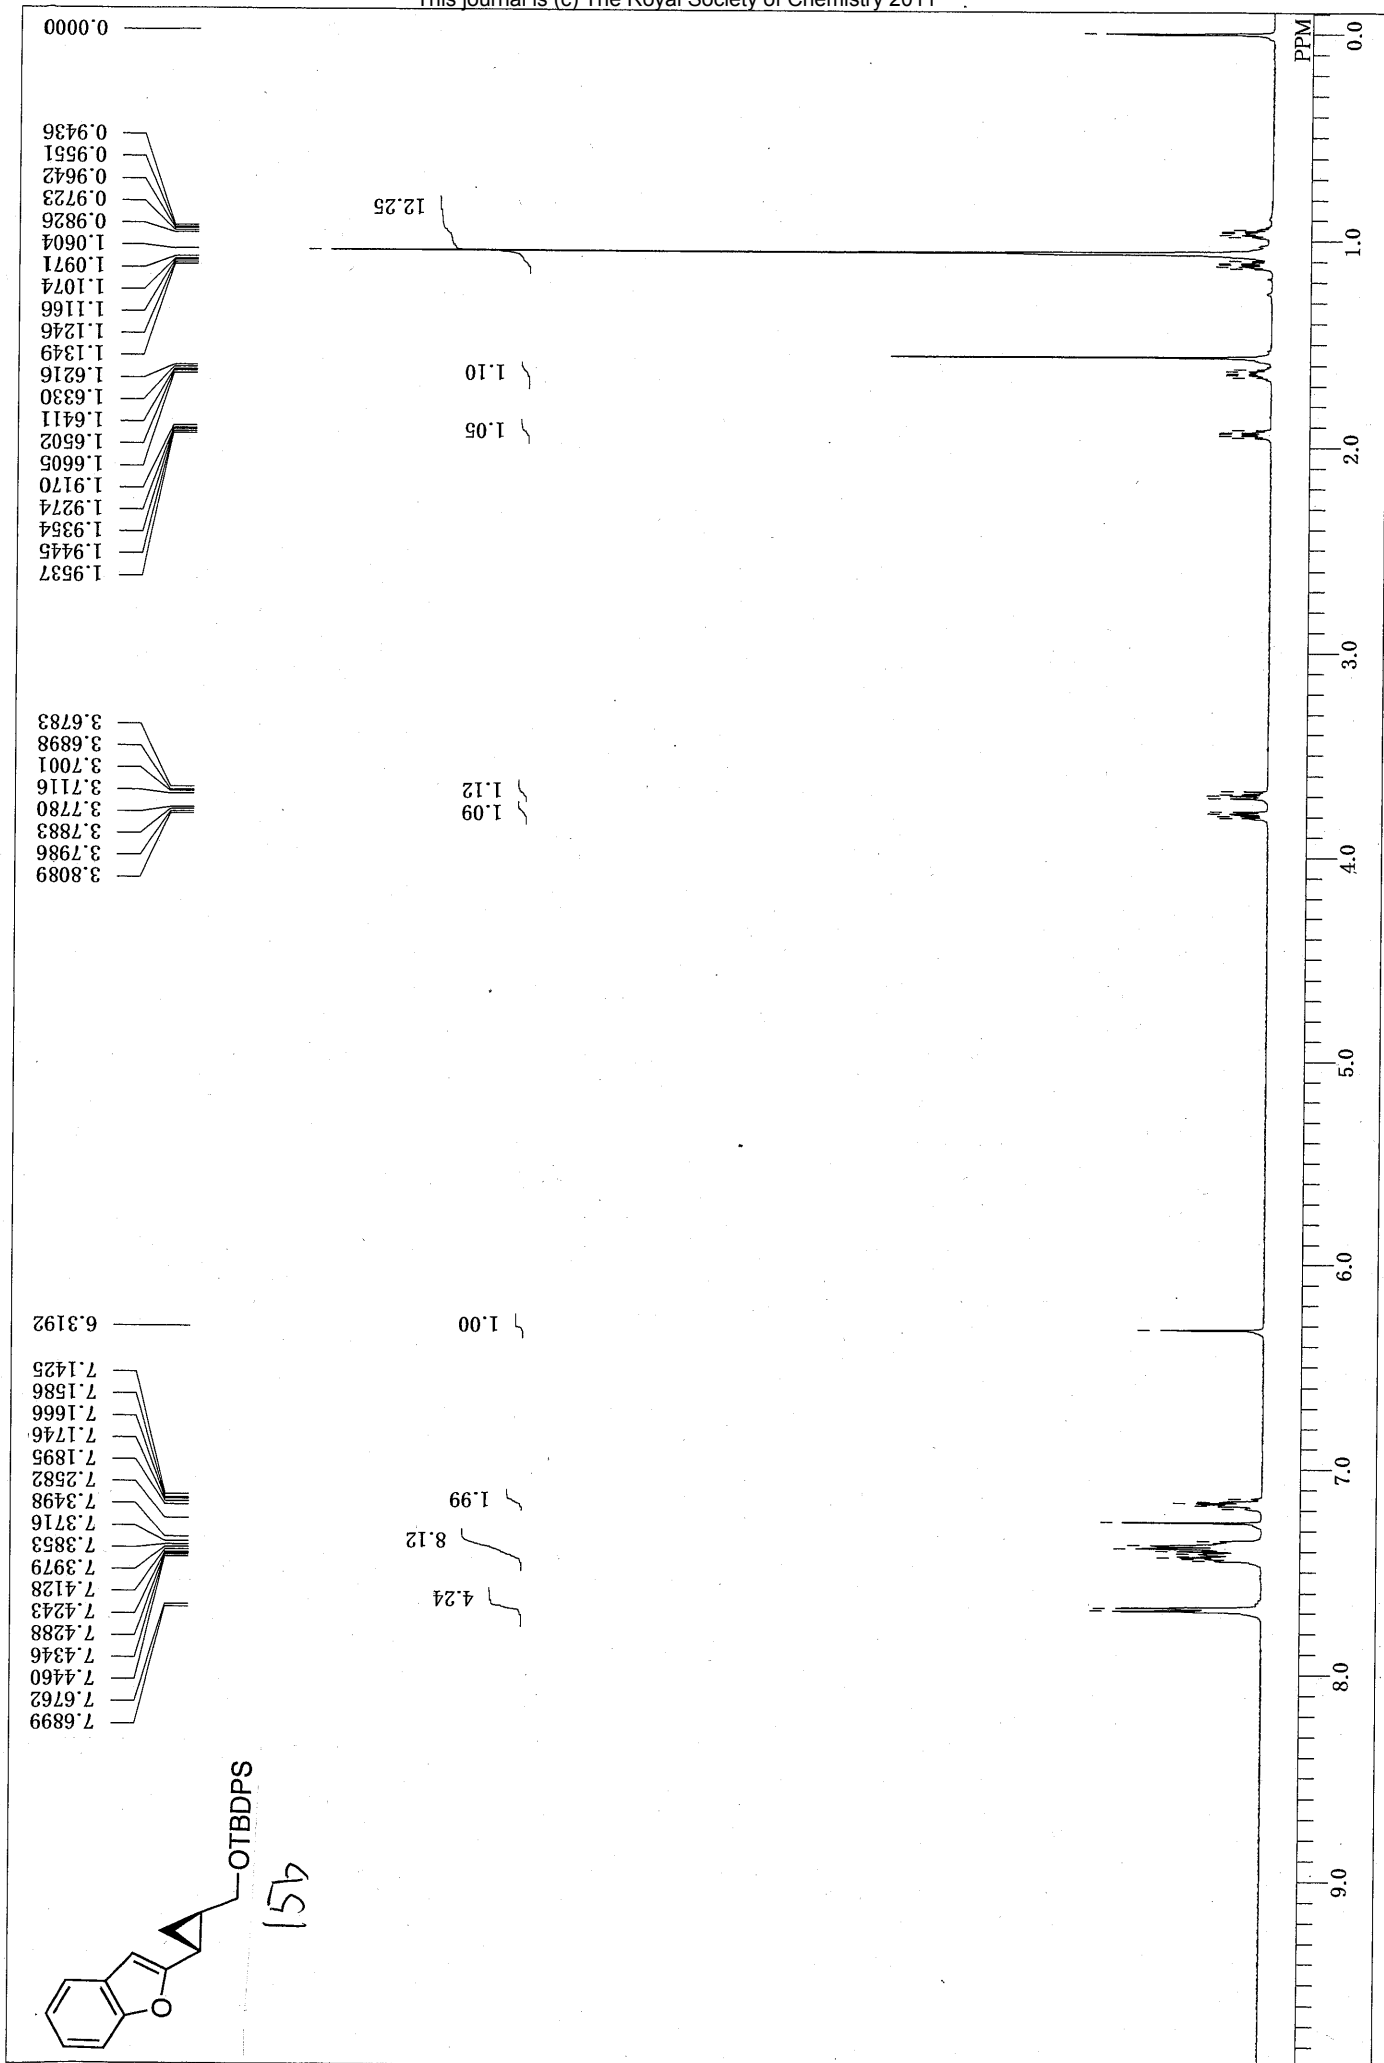

07KT5-38-1a C(500, CDCl<sub>3</sub>)

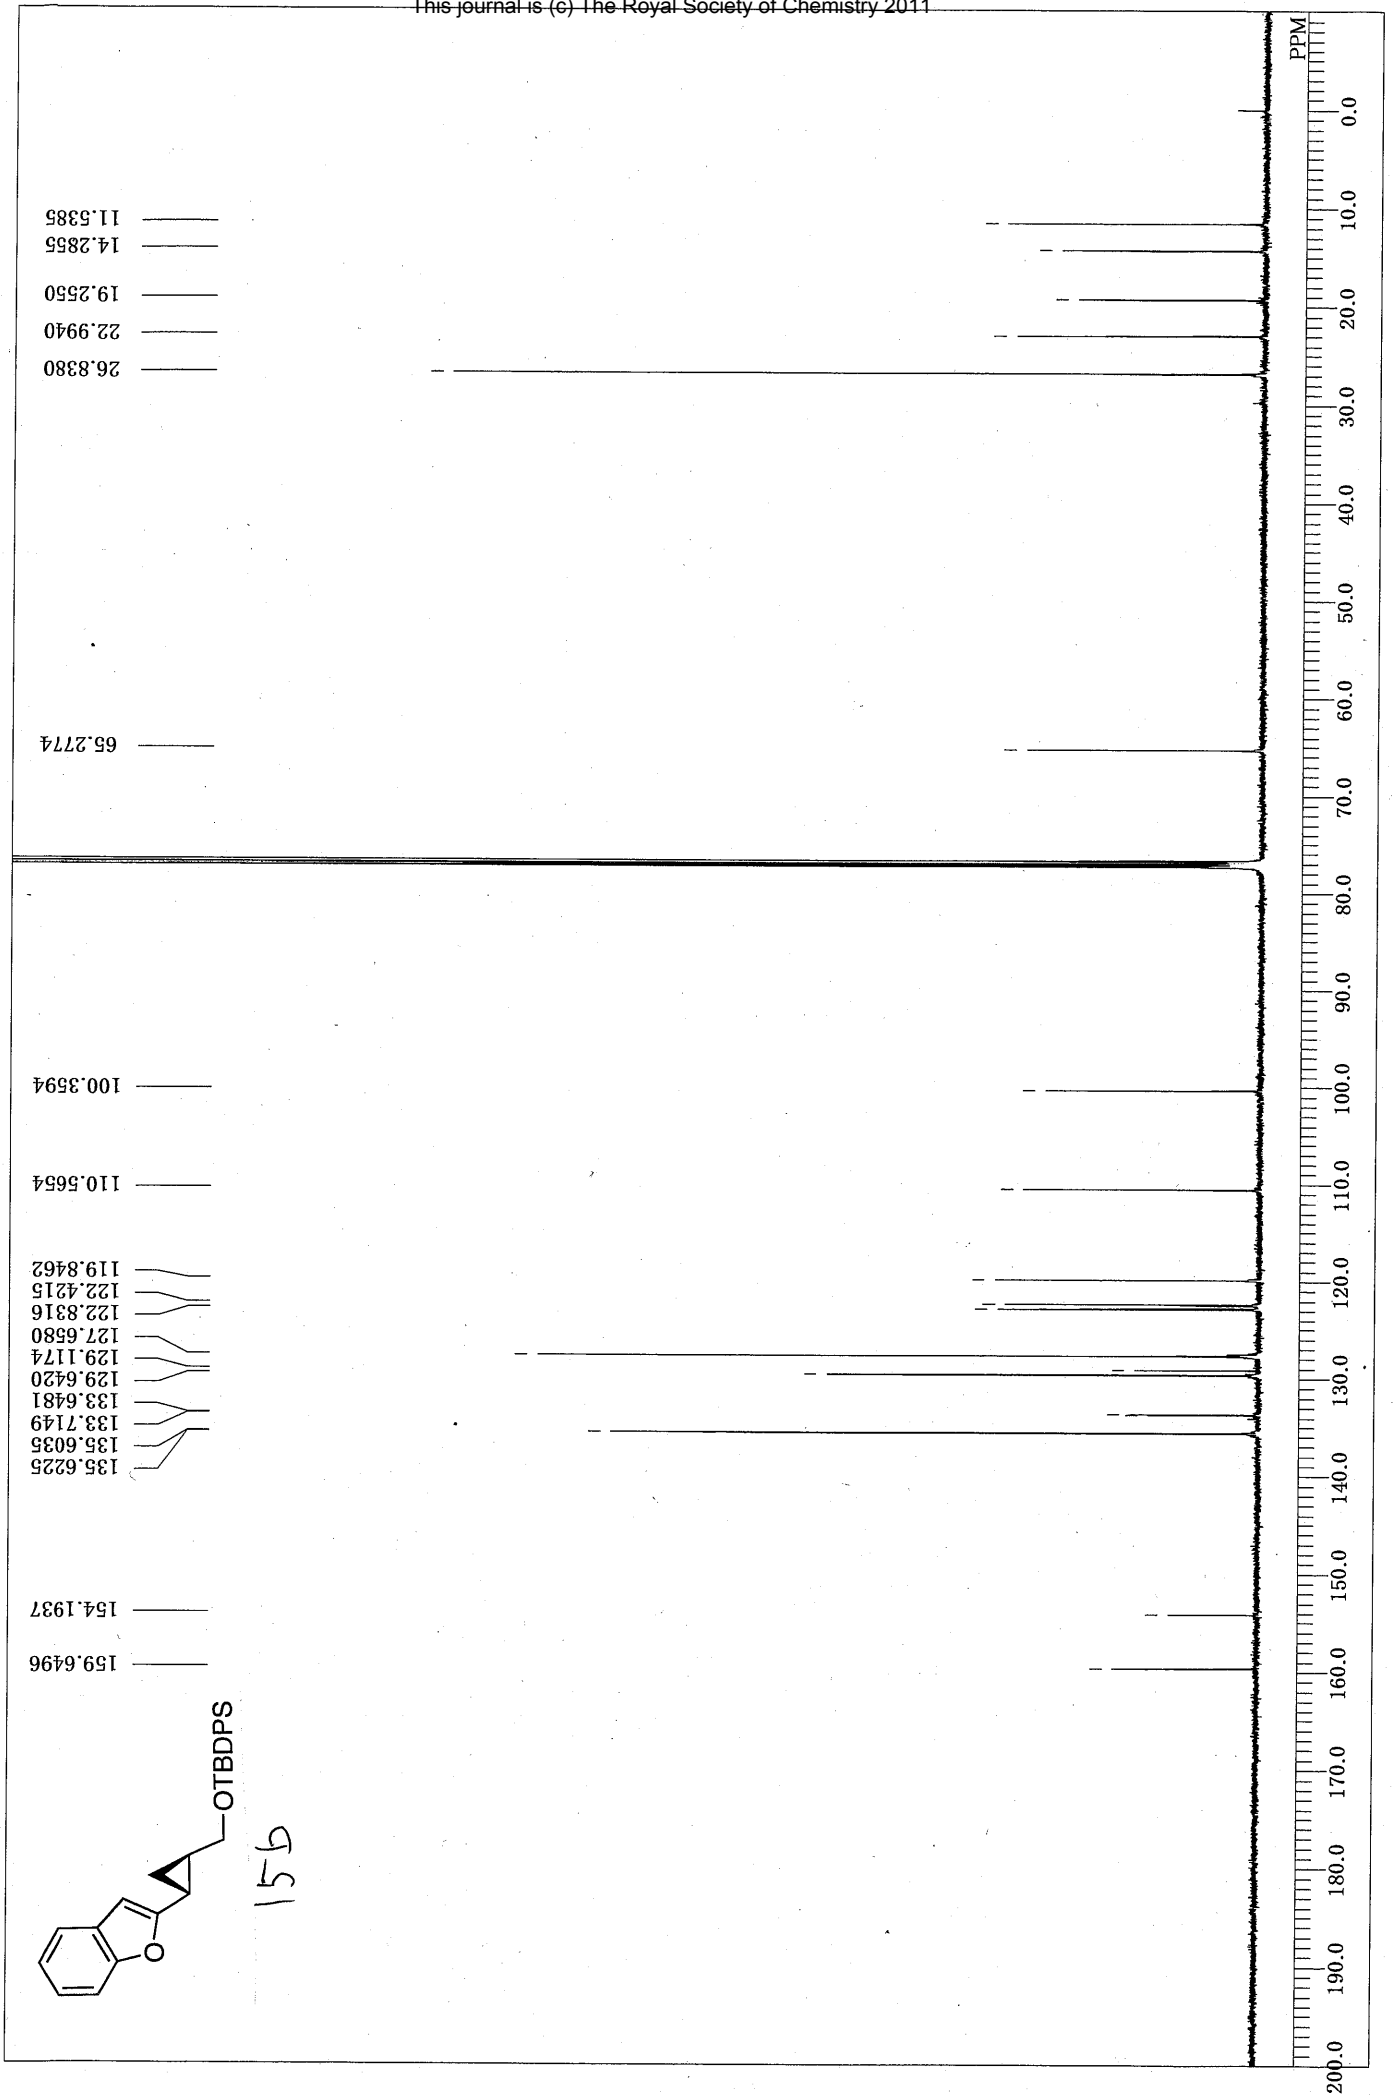

07KT7-17-1a (500, CDCl<sub>3</sub>)

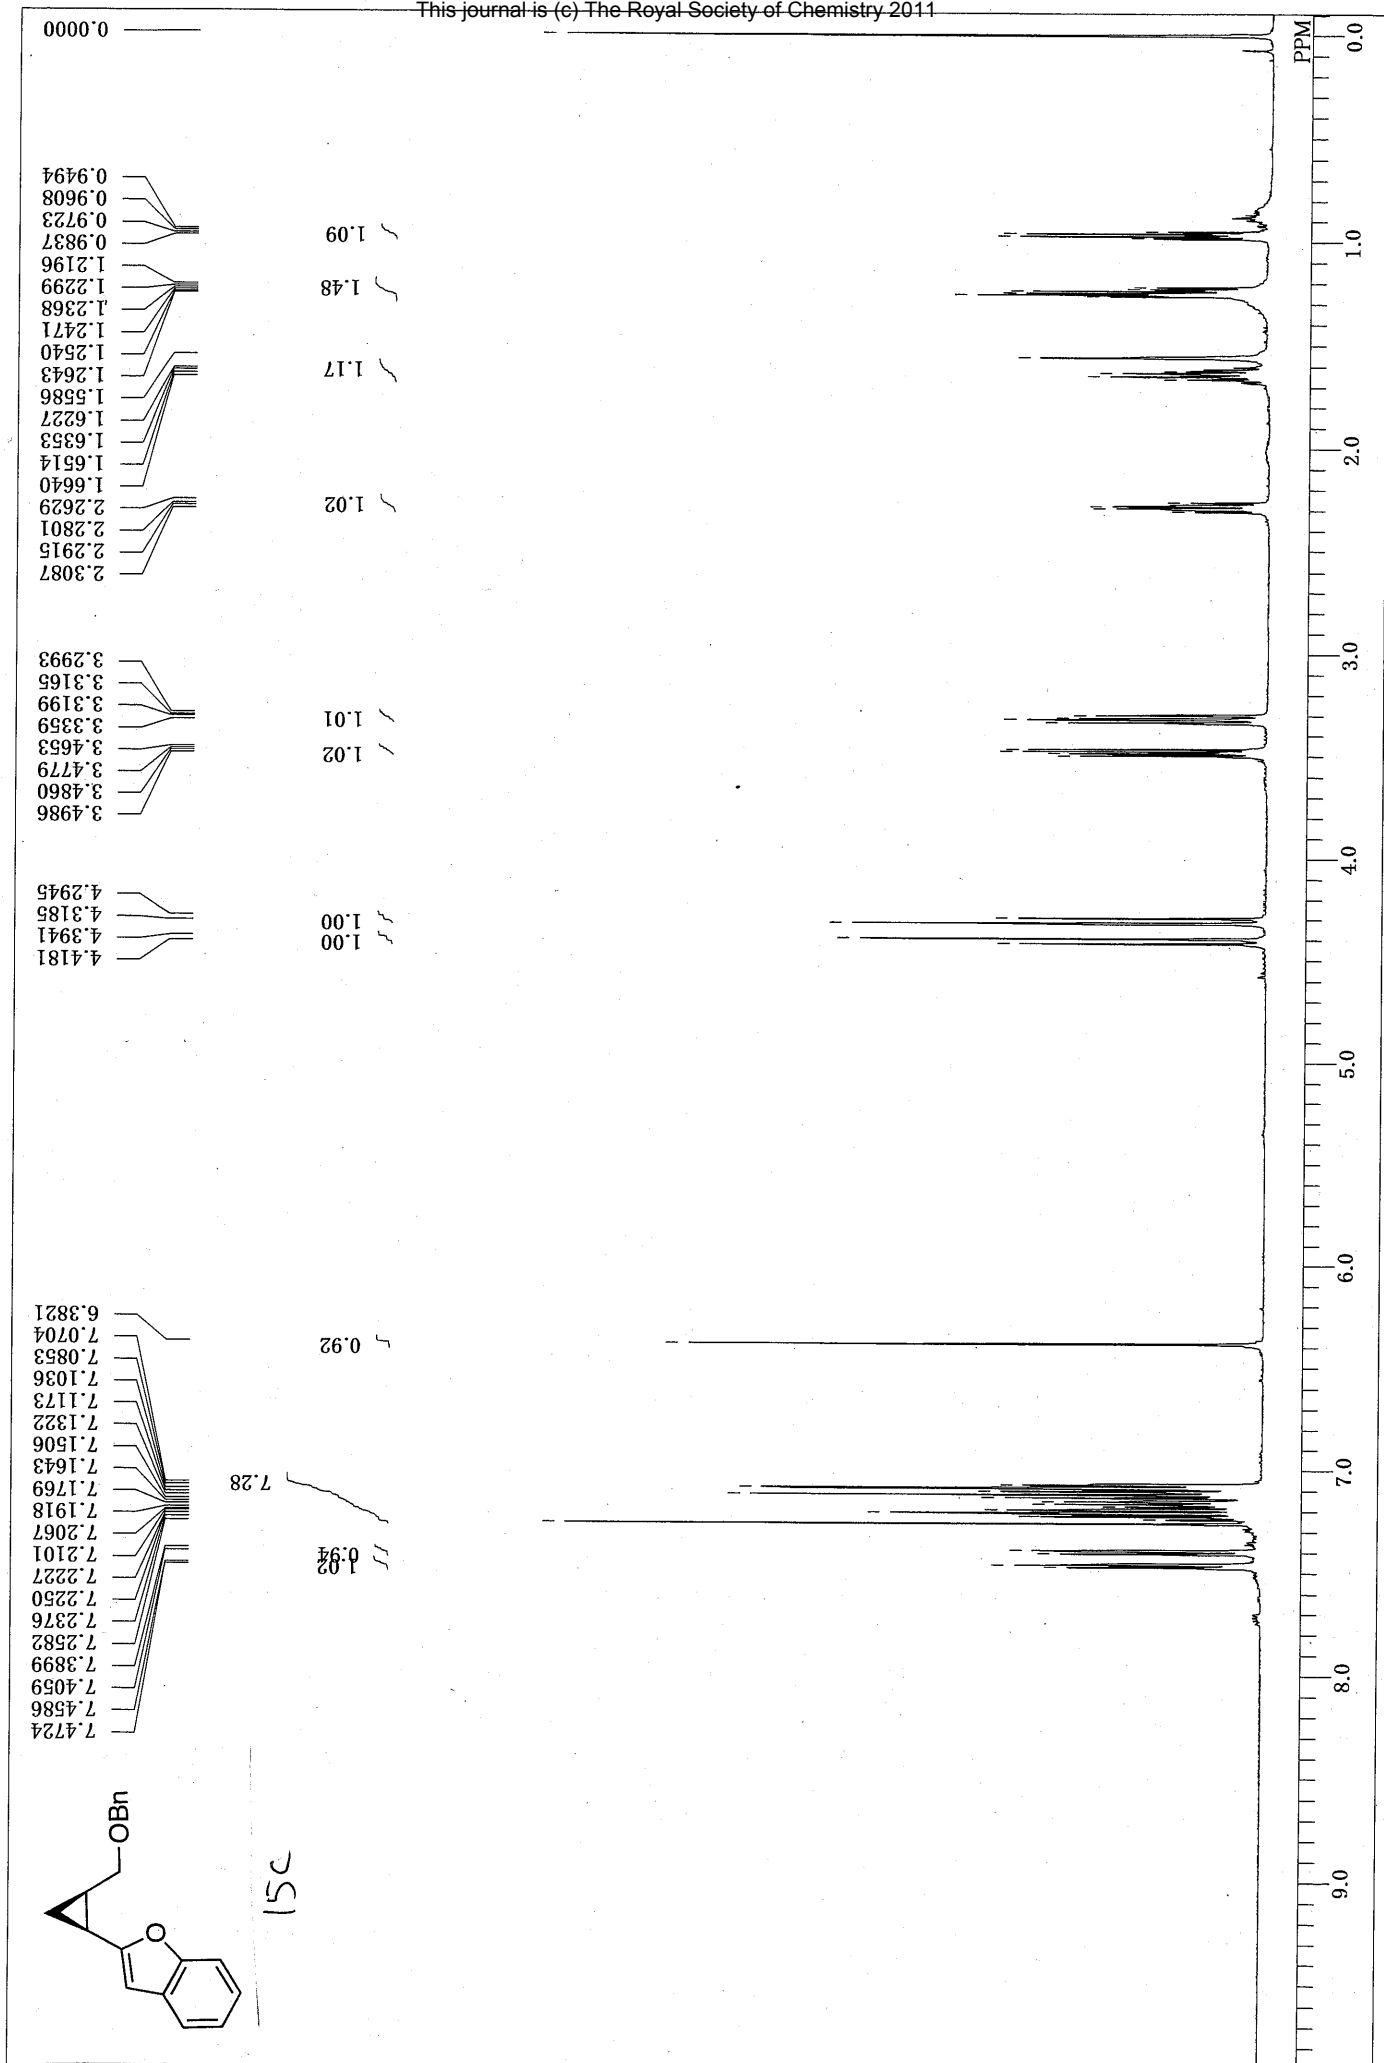

07KT7-17-1aC(500,CDCl3)

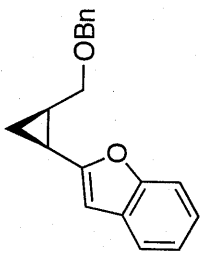

15c

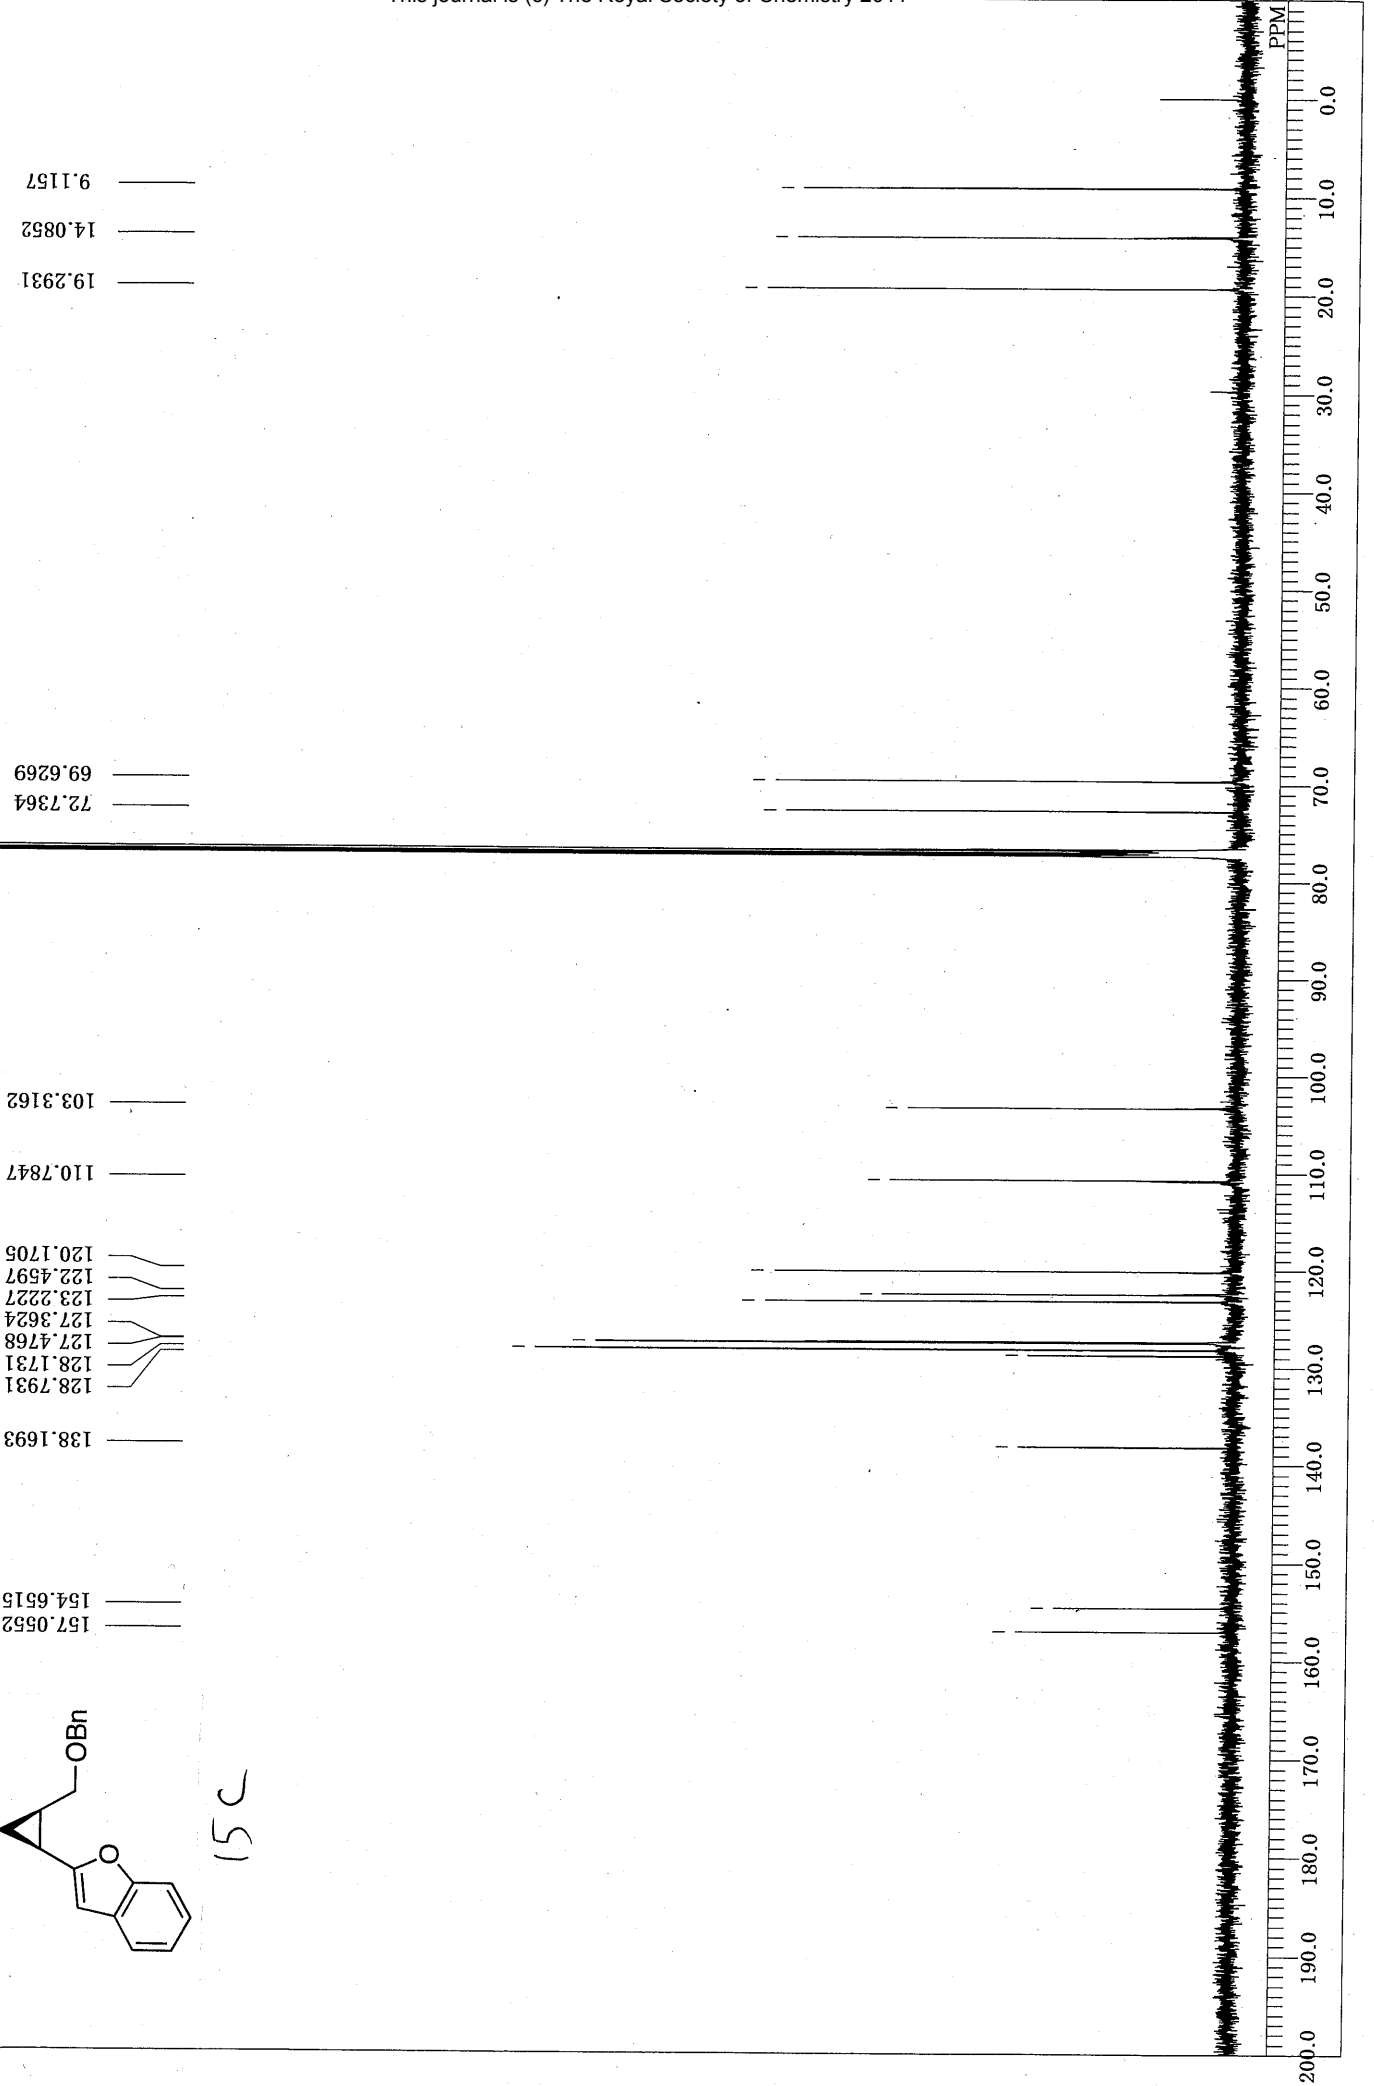

07KT6-99-1(500, CDCl<sub>3</sub>)

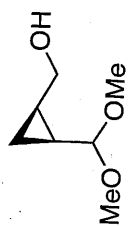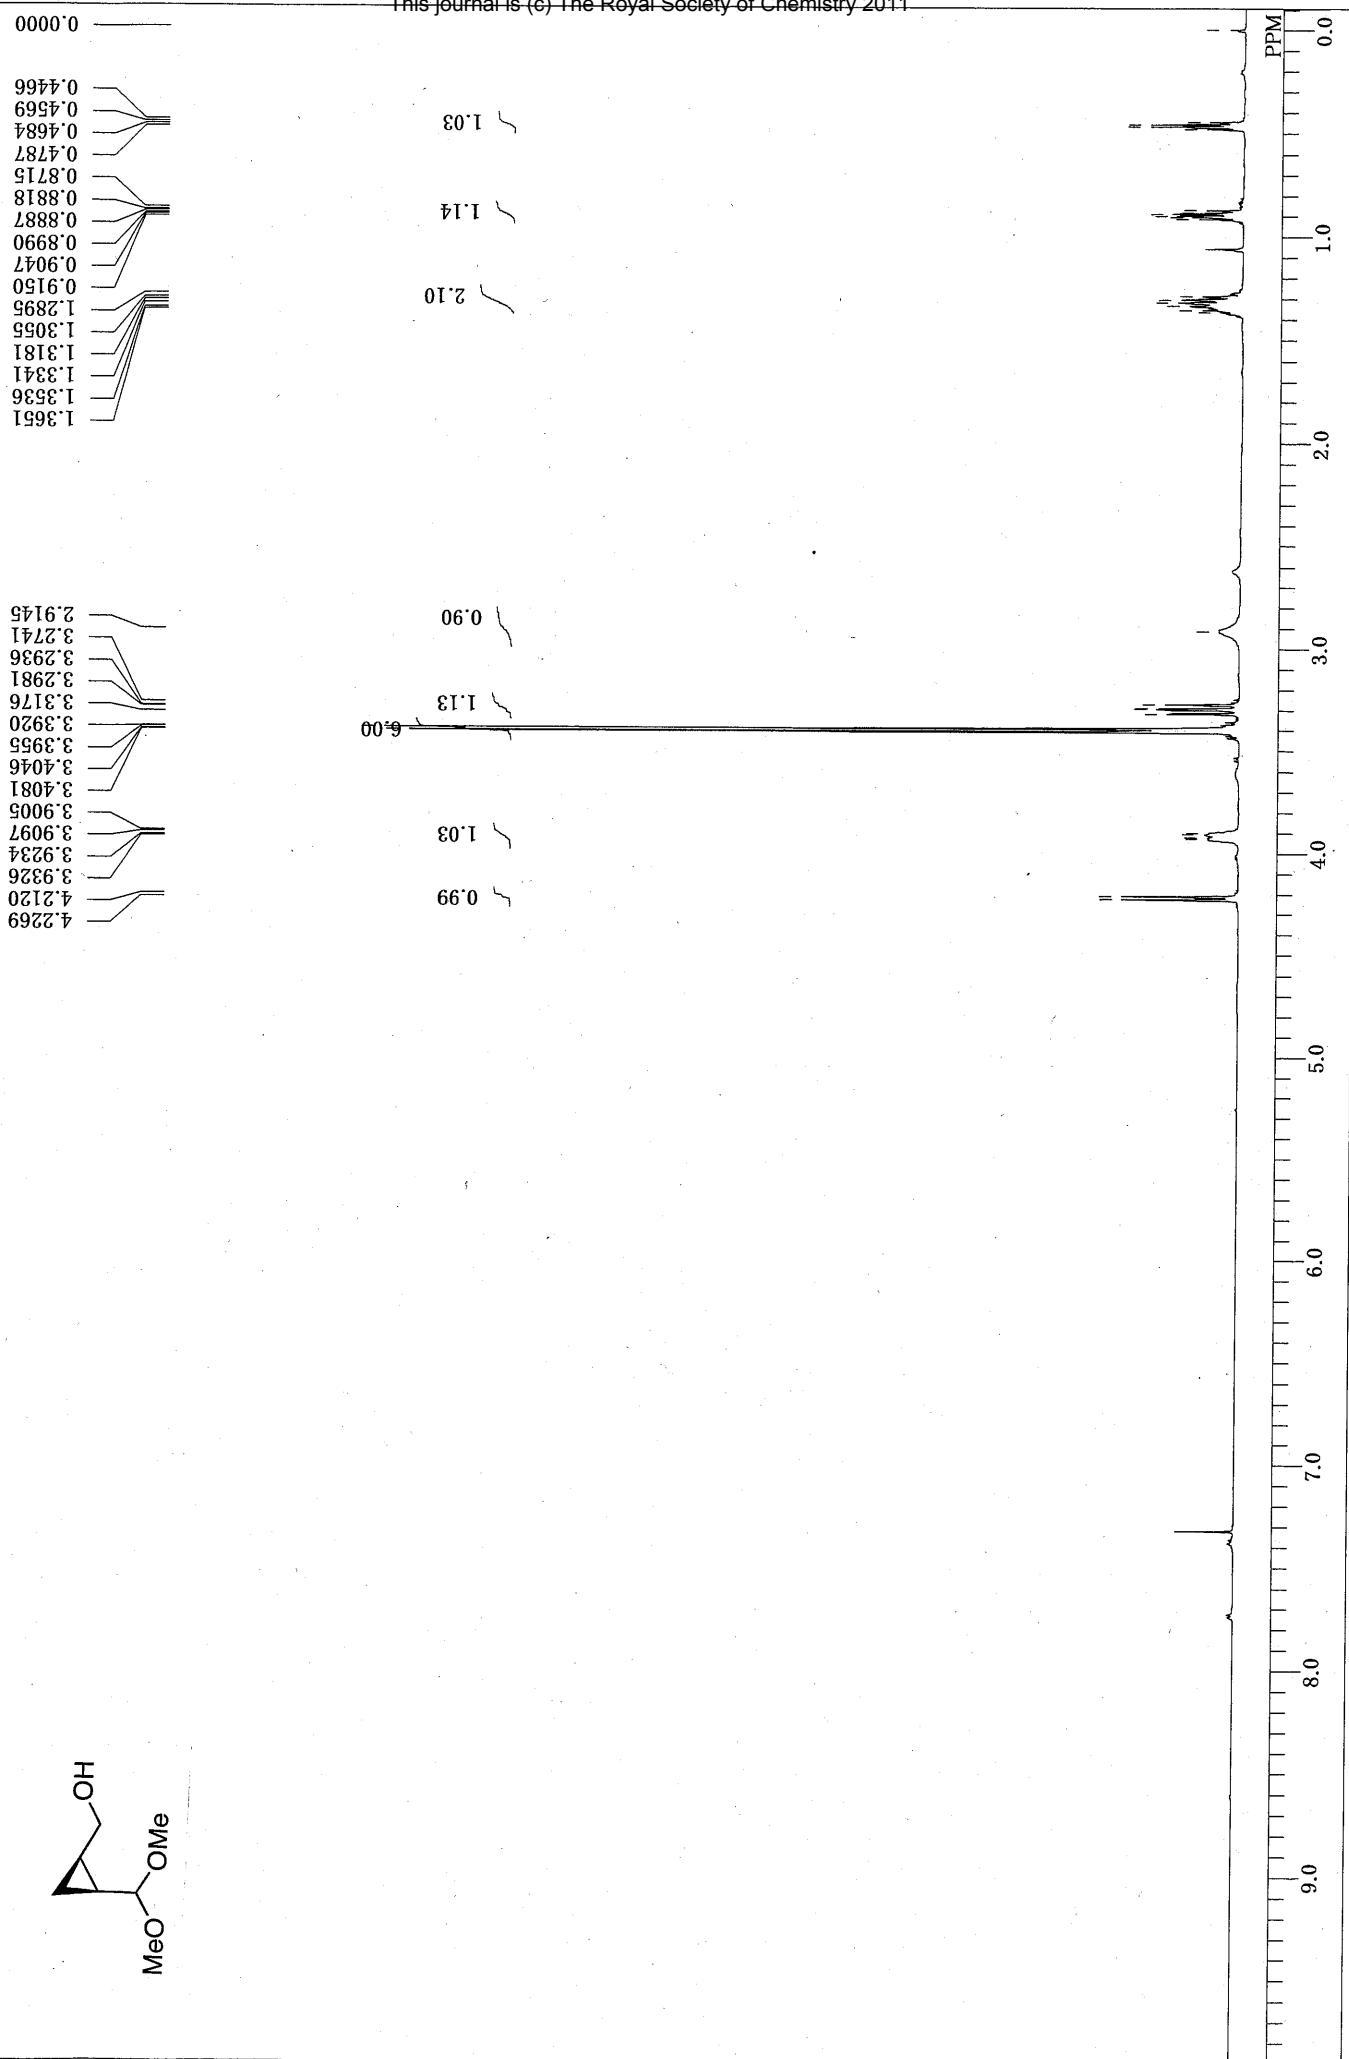

07KT6-99-1C(500, CDCl3)

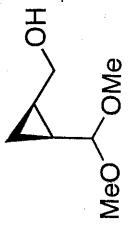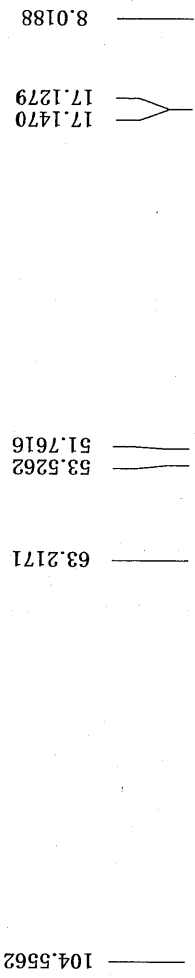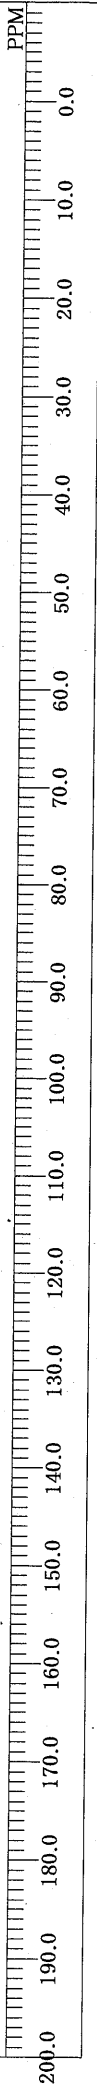

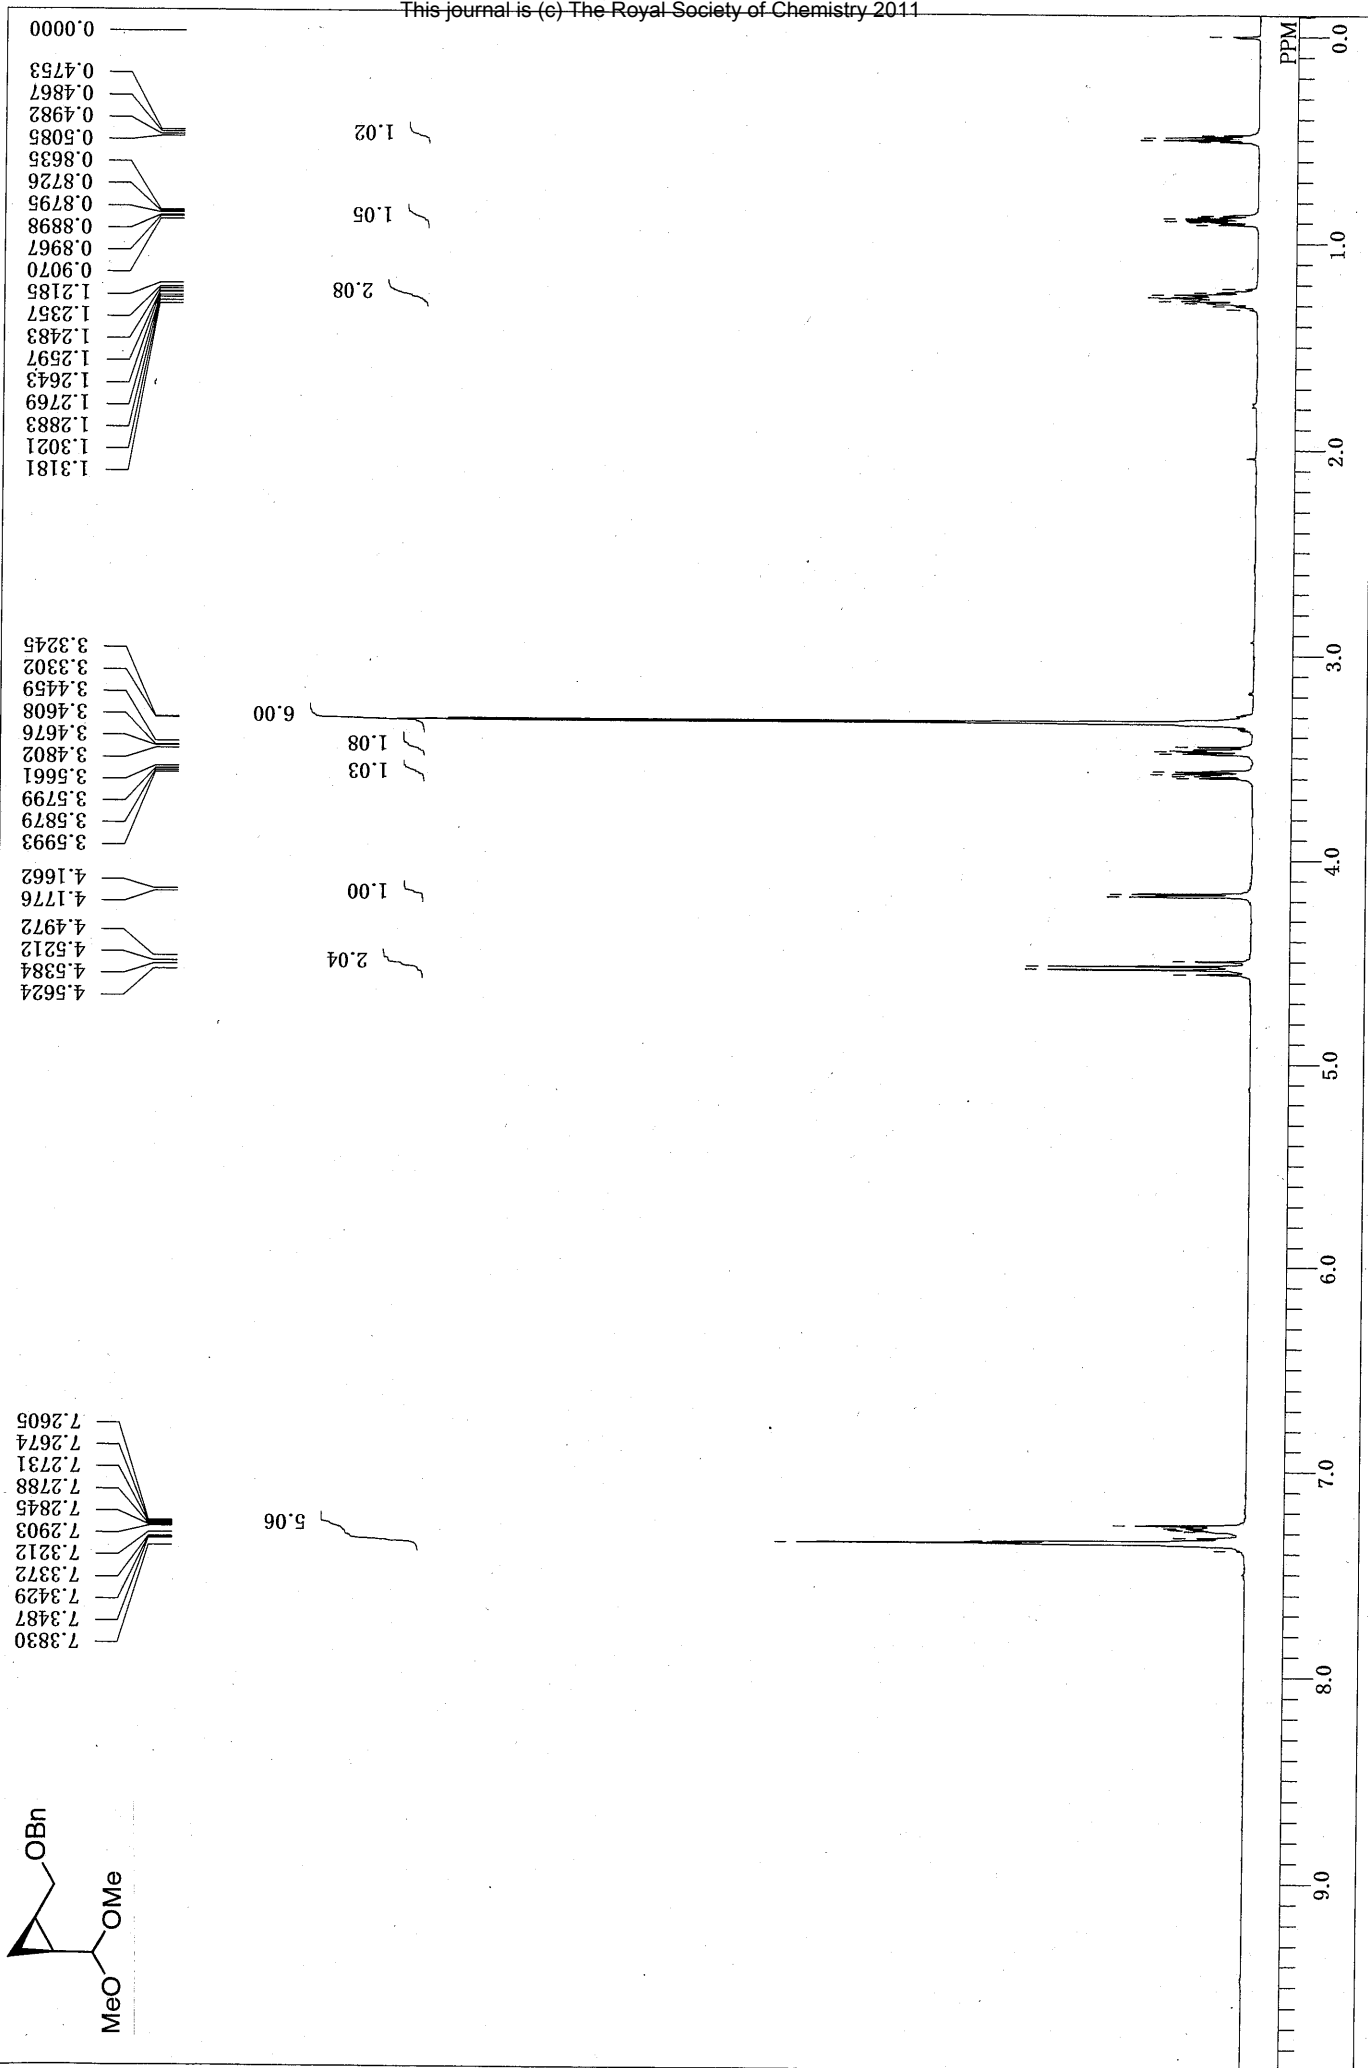

07KT6-100-1(500, CDCl3)

07KT6-100-1C(500, CDCl<sub>3</sub>)

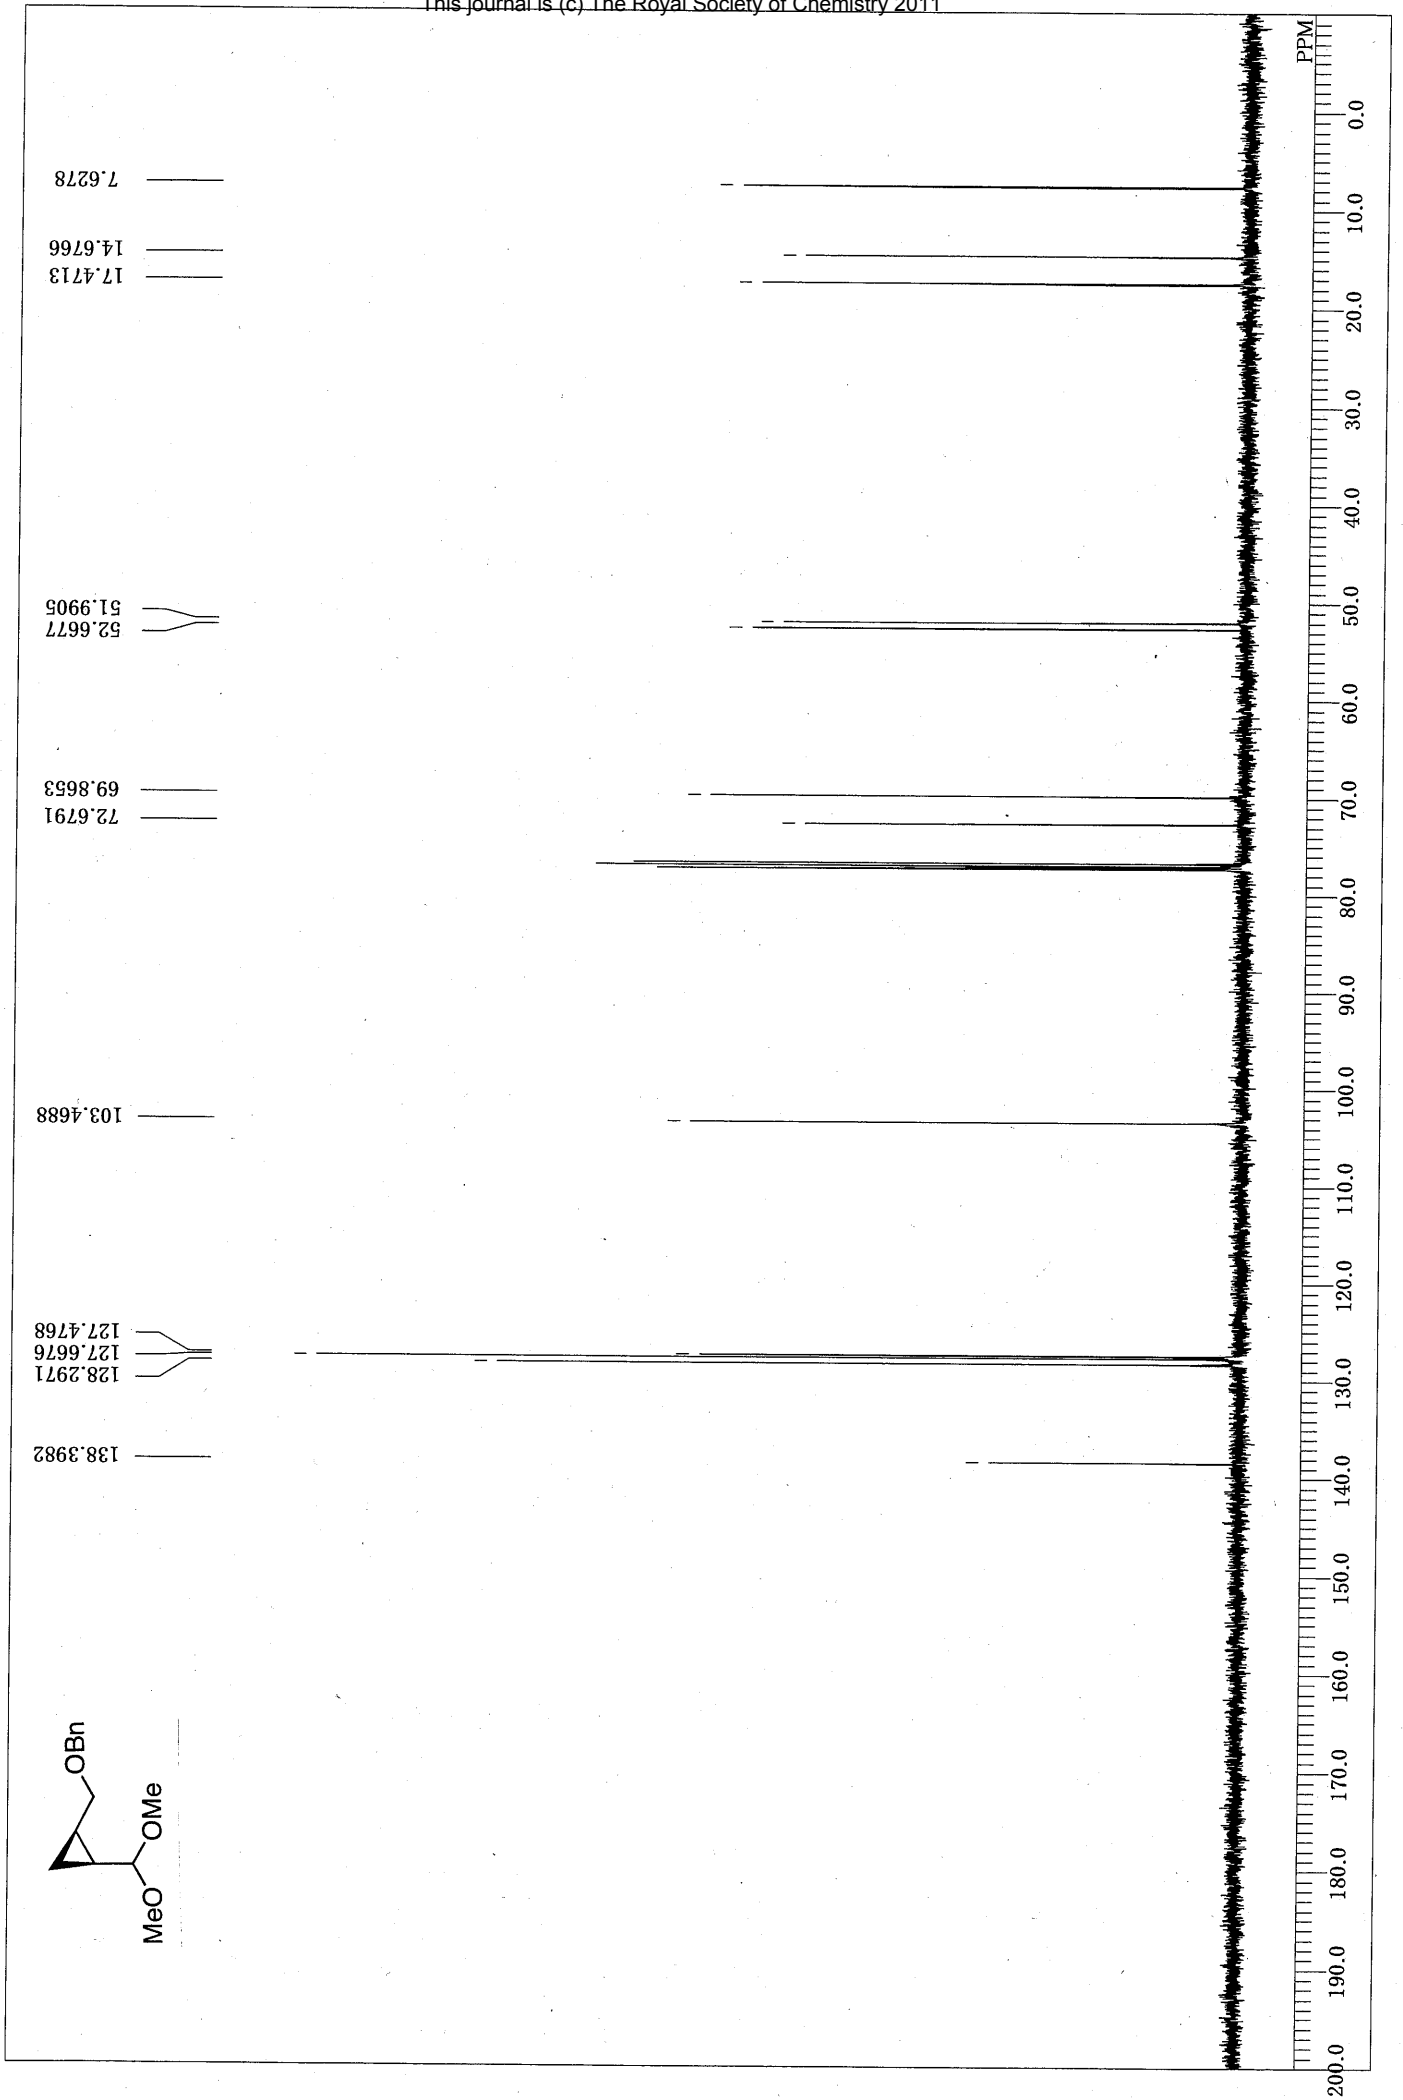



07KT6-90-1(400, CDCl<sub>3</sub>)

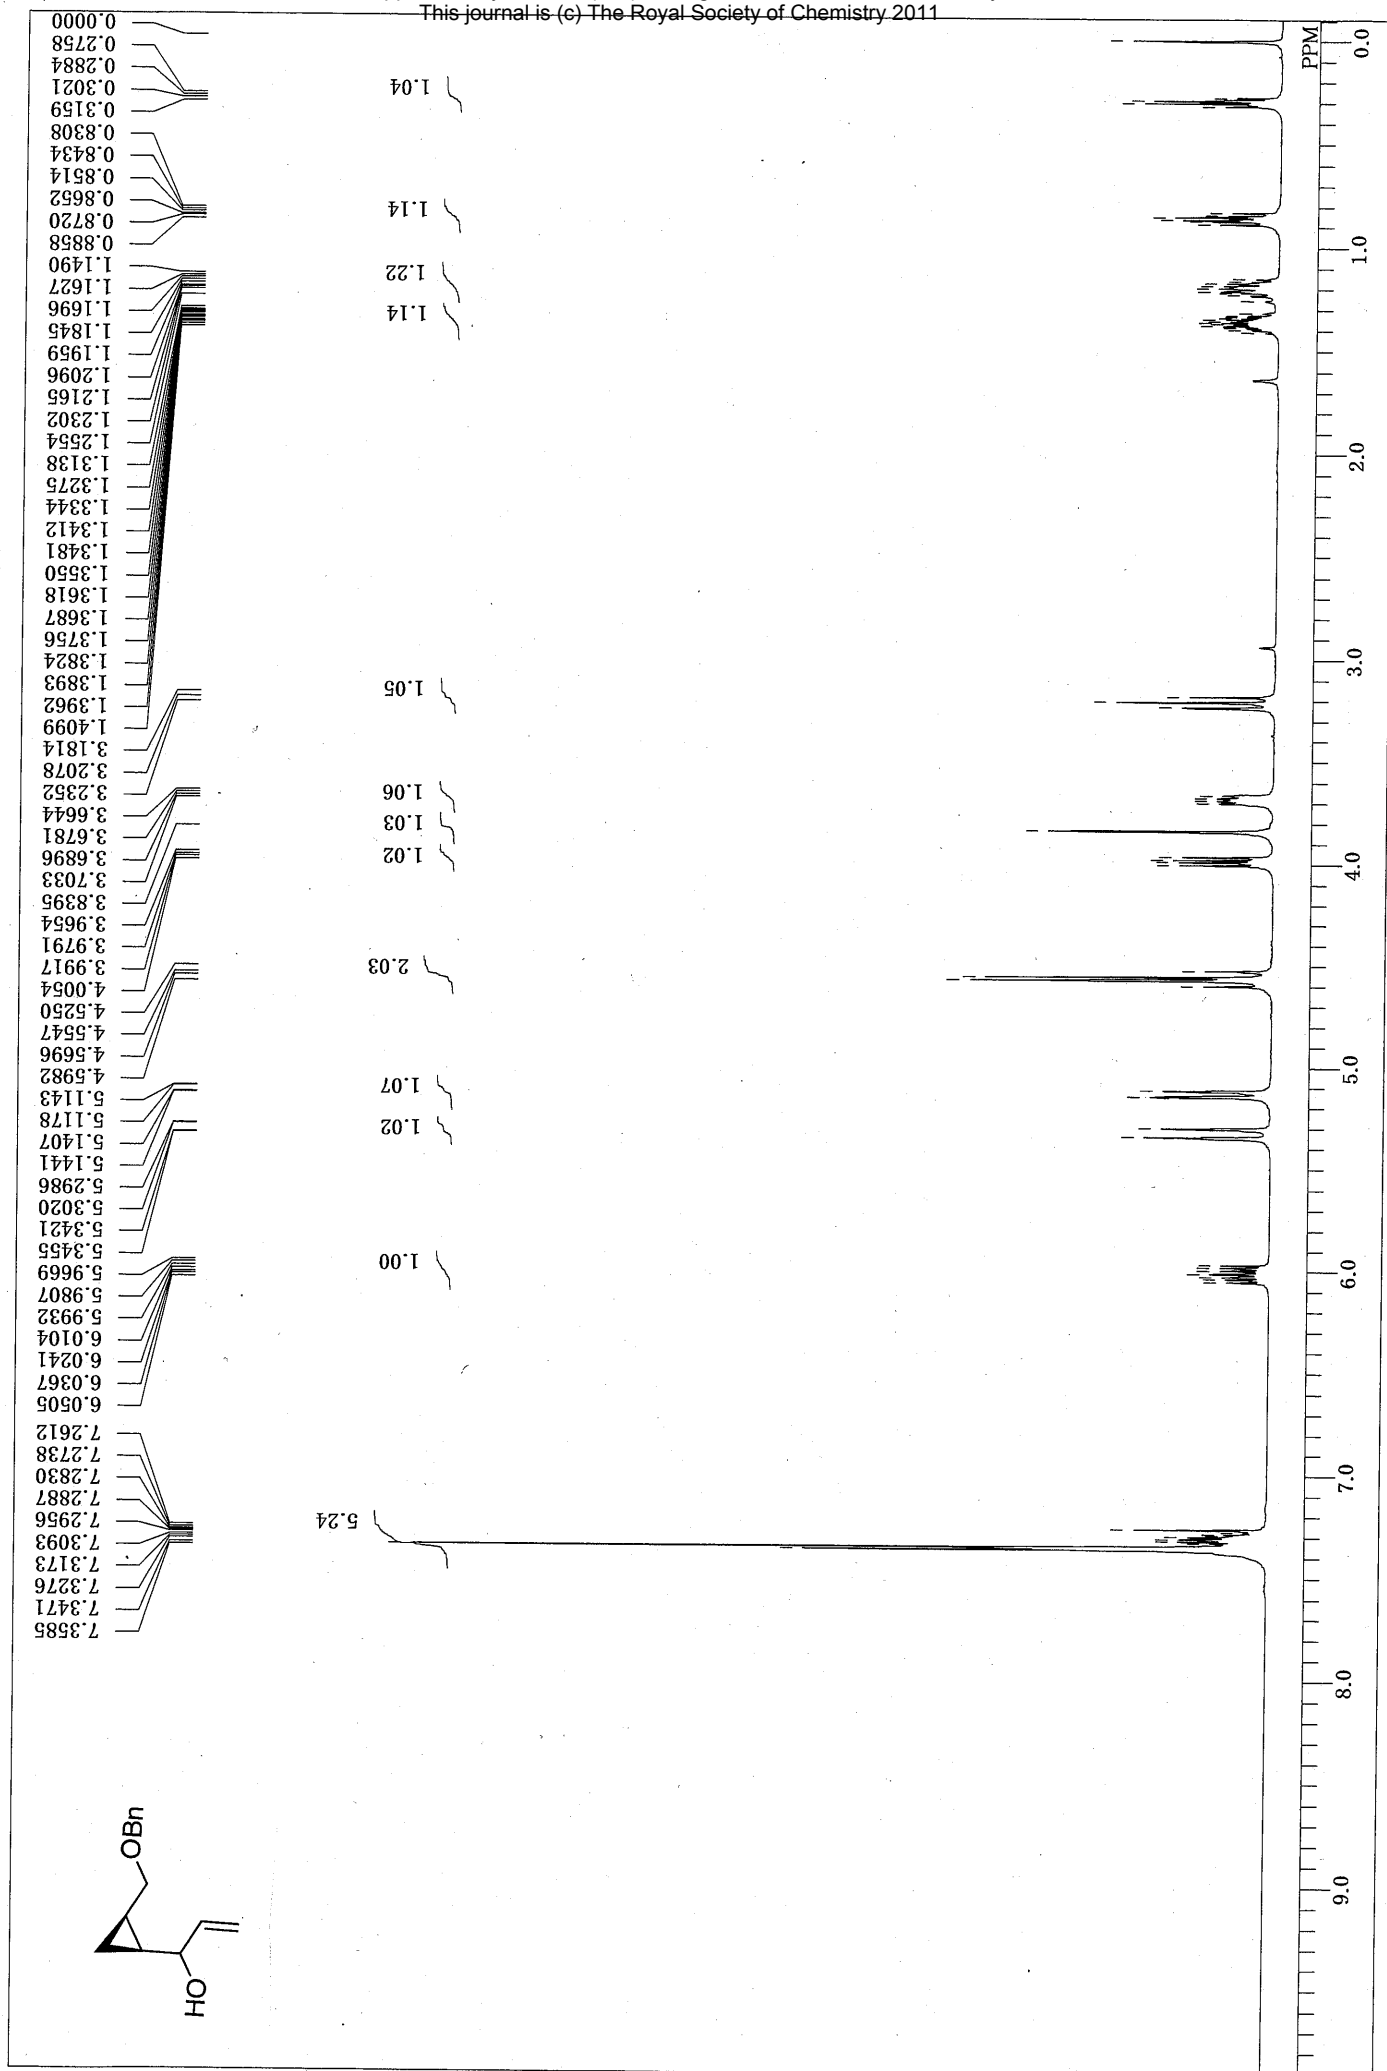

07KT6-90-1C(500,CDCl3)

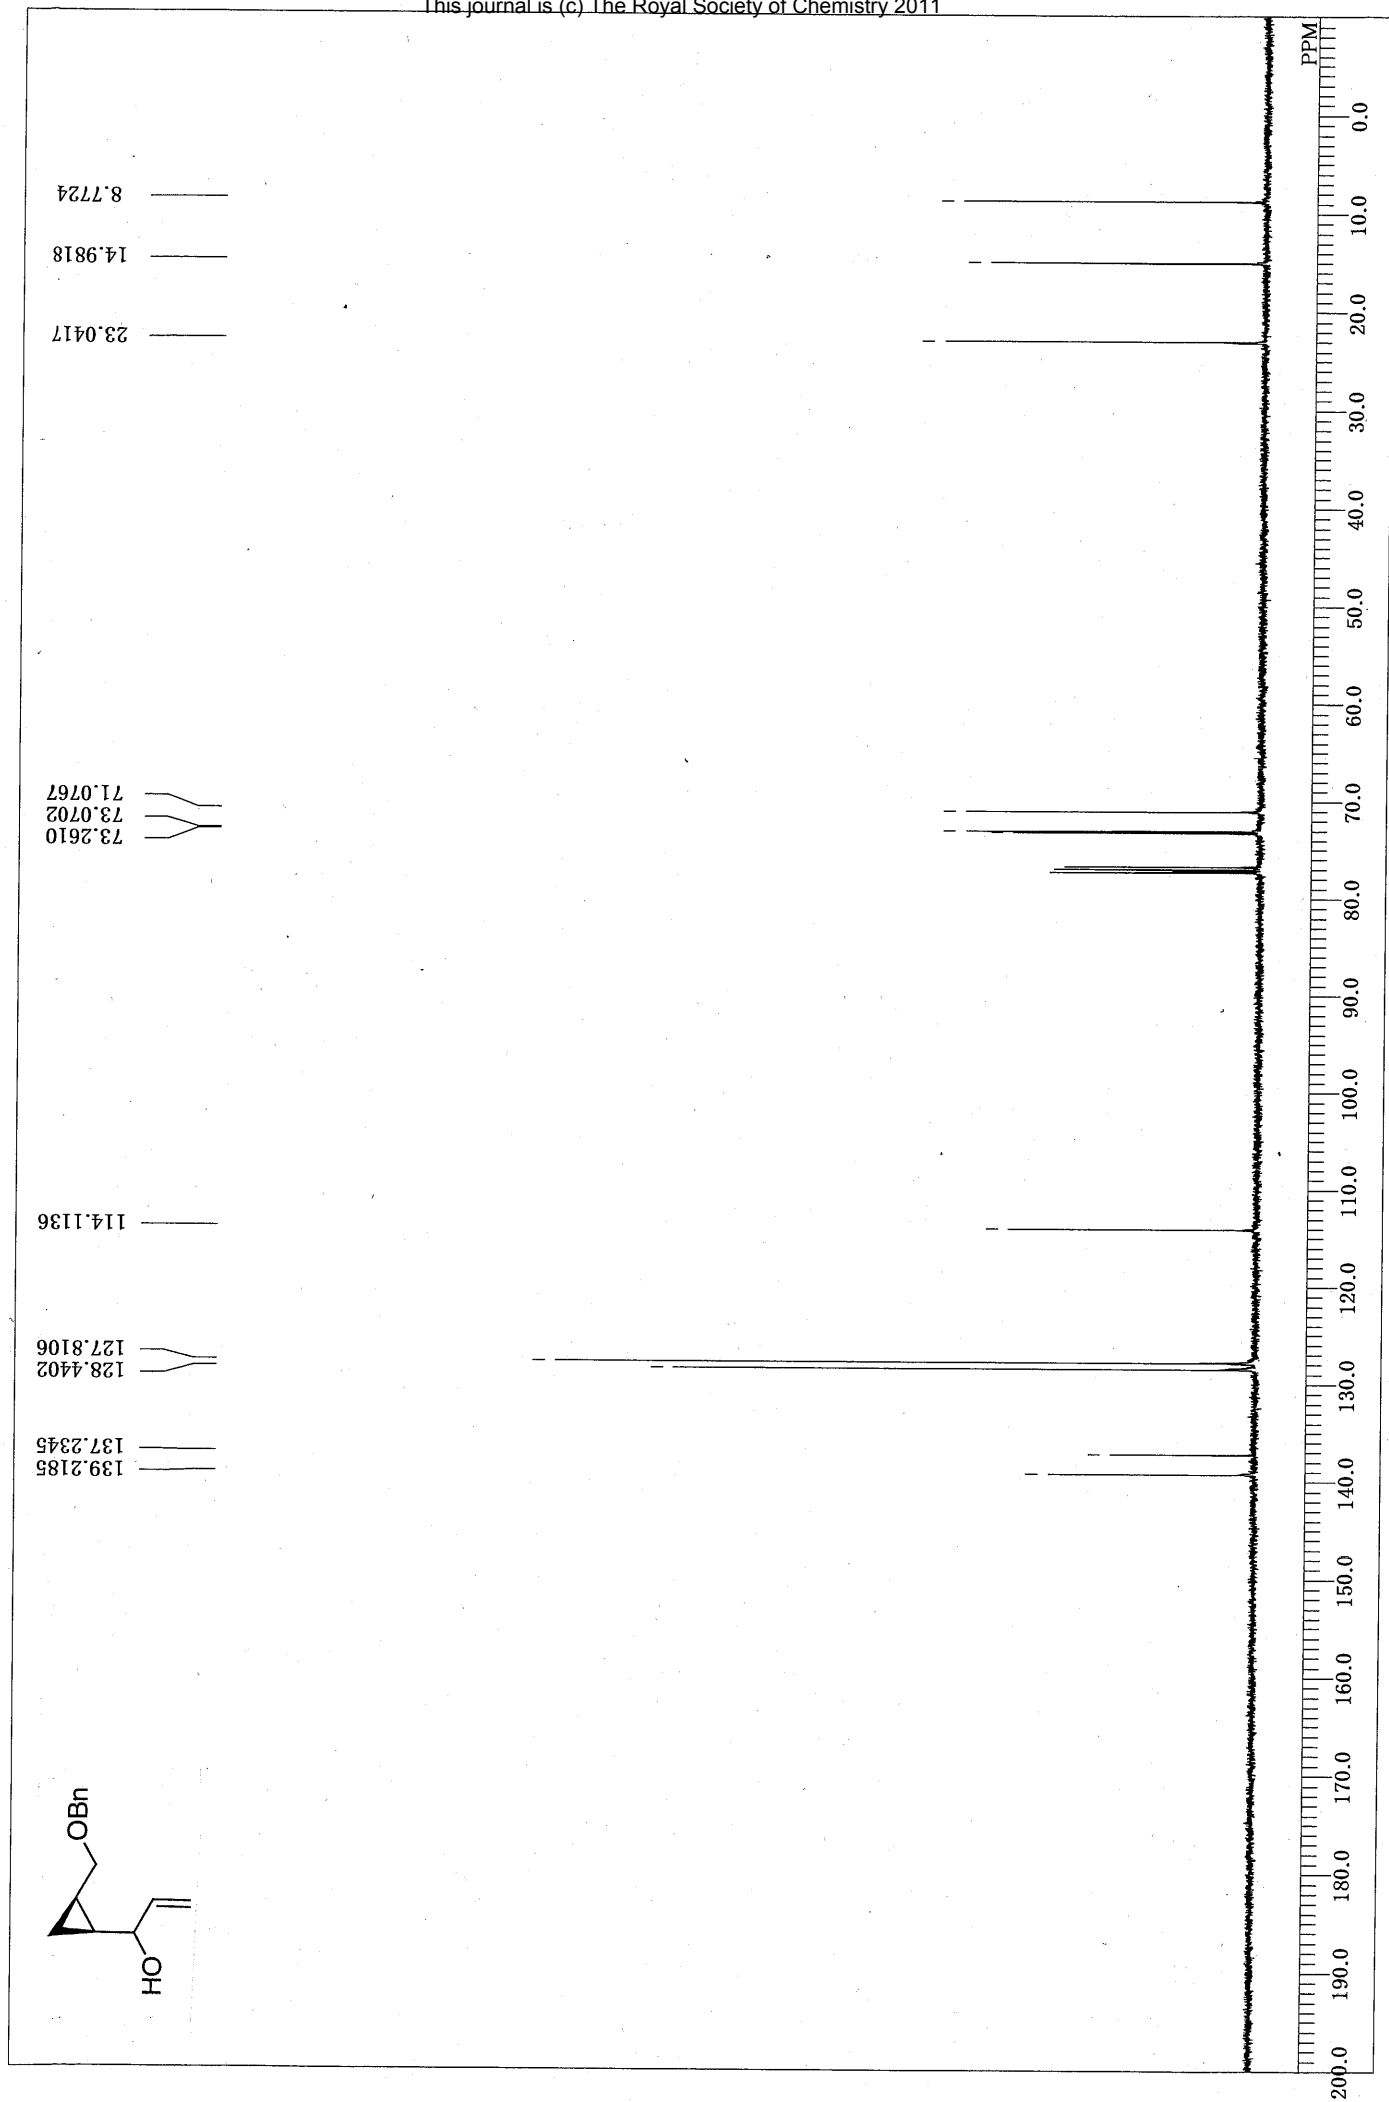

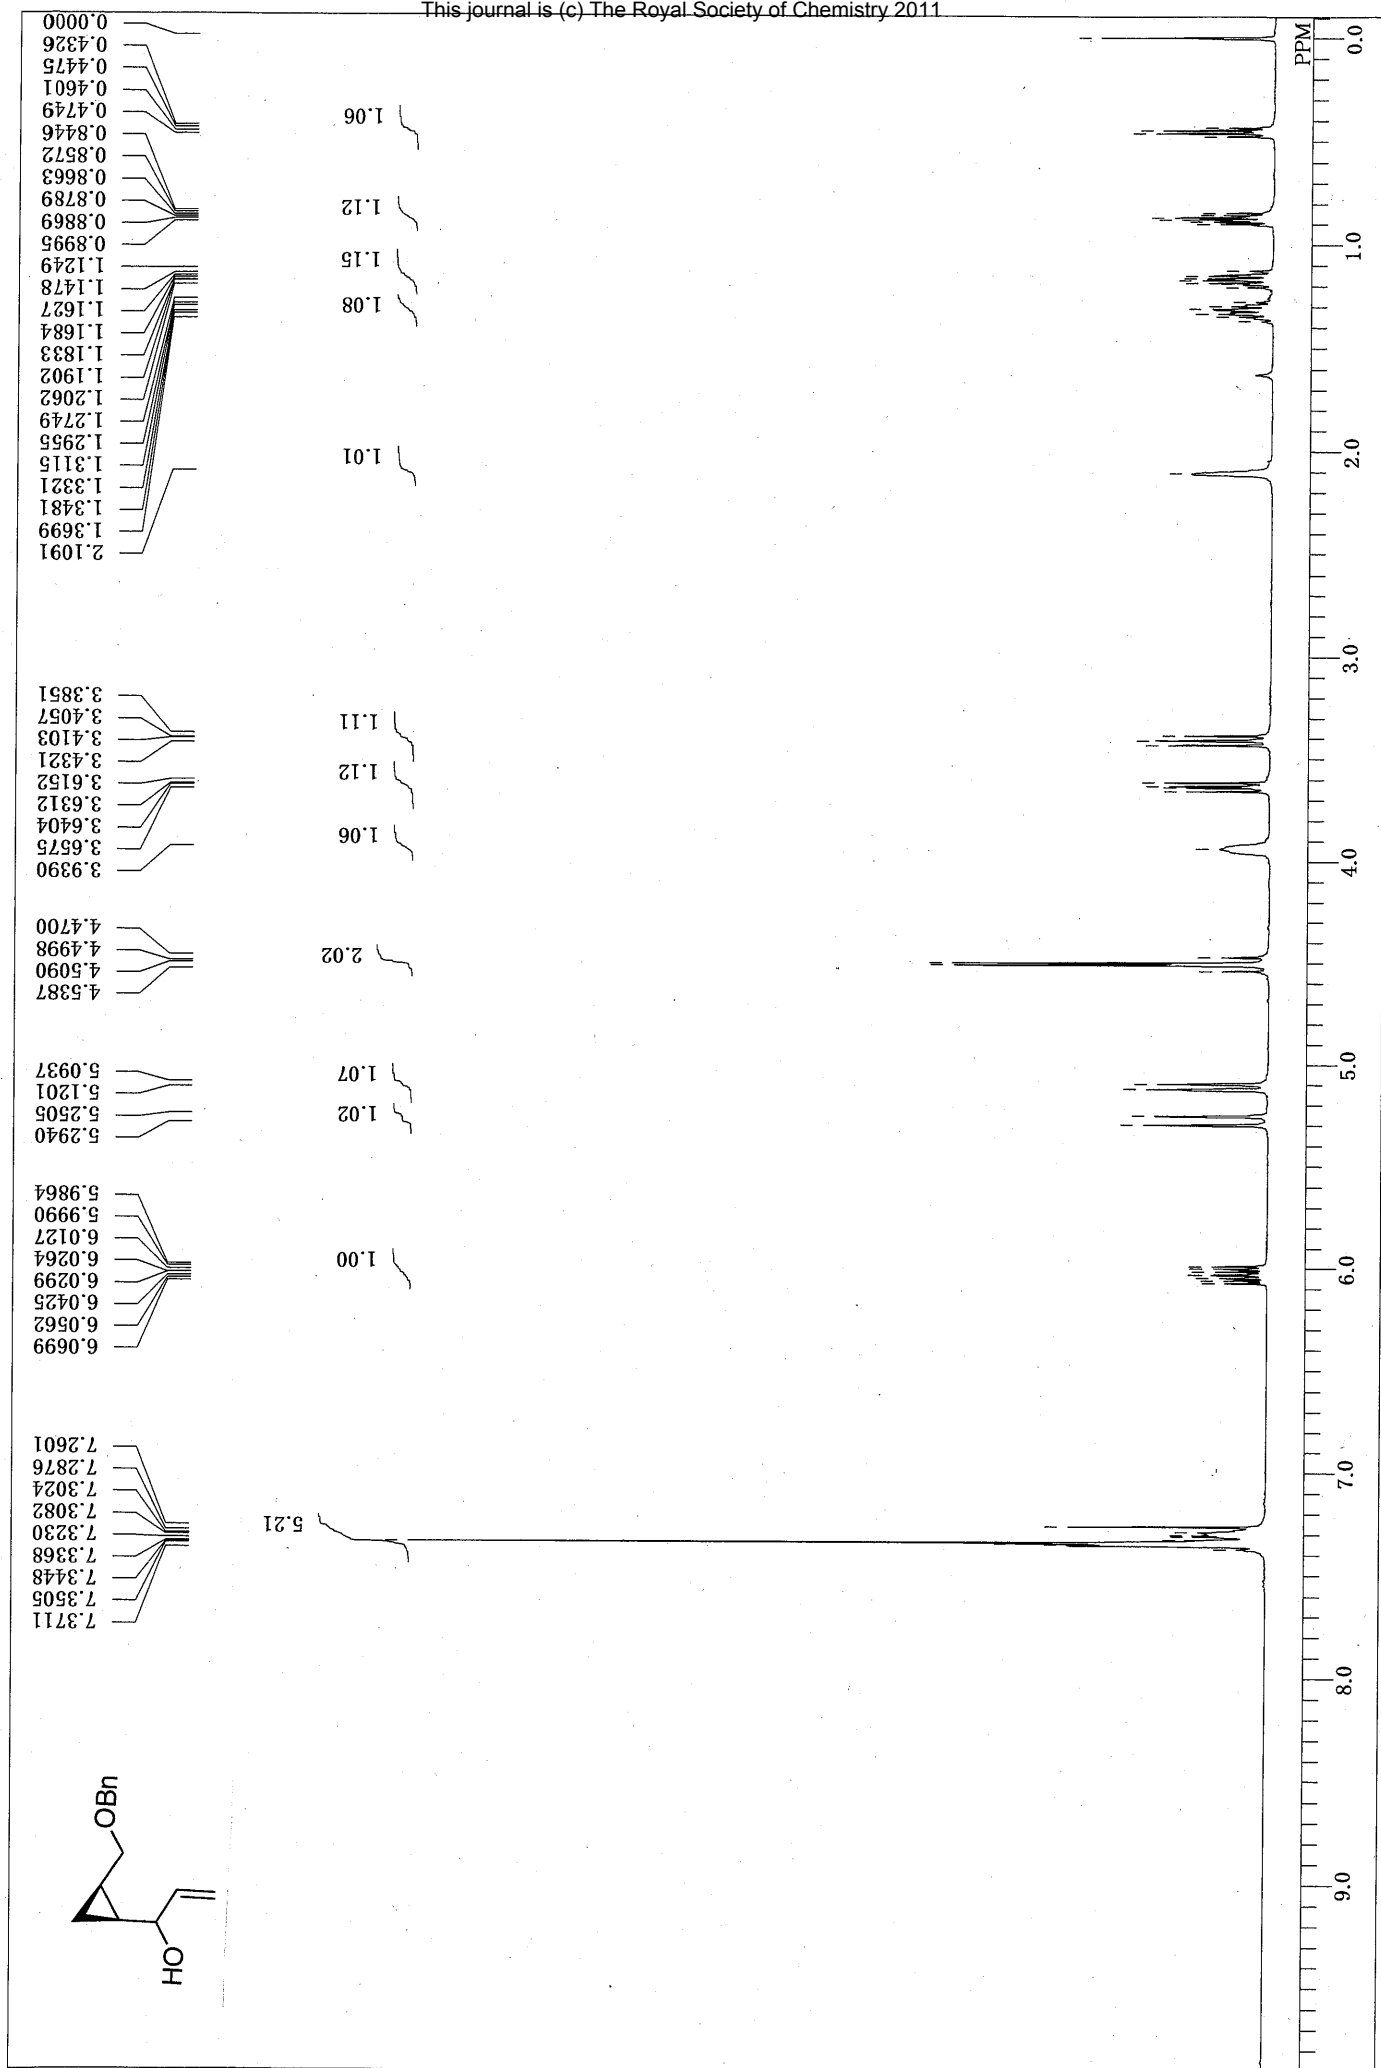

07KT6-90-2C(500, CDCl<sub>3</sub>)

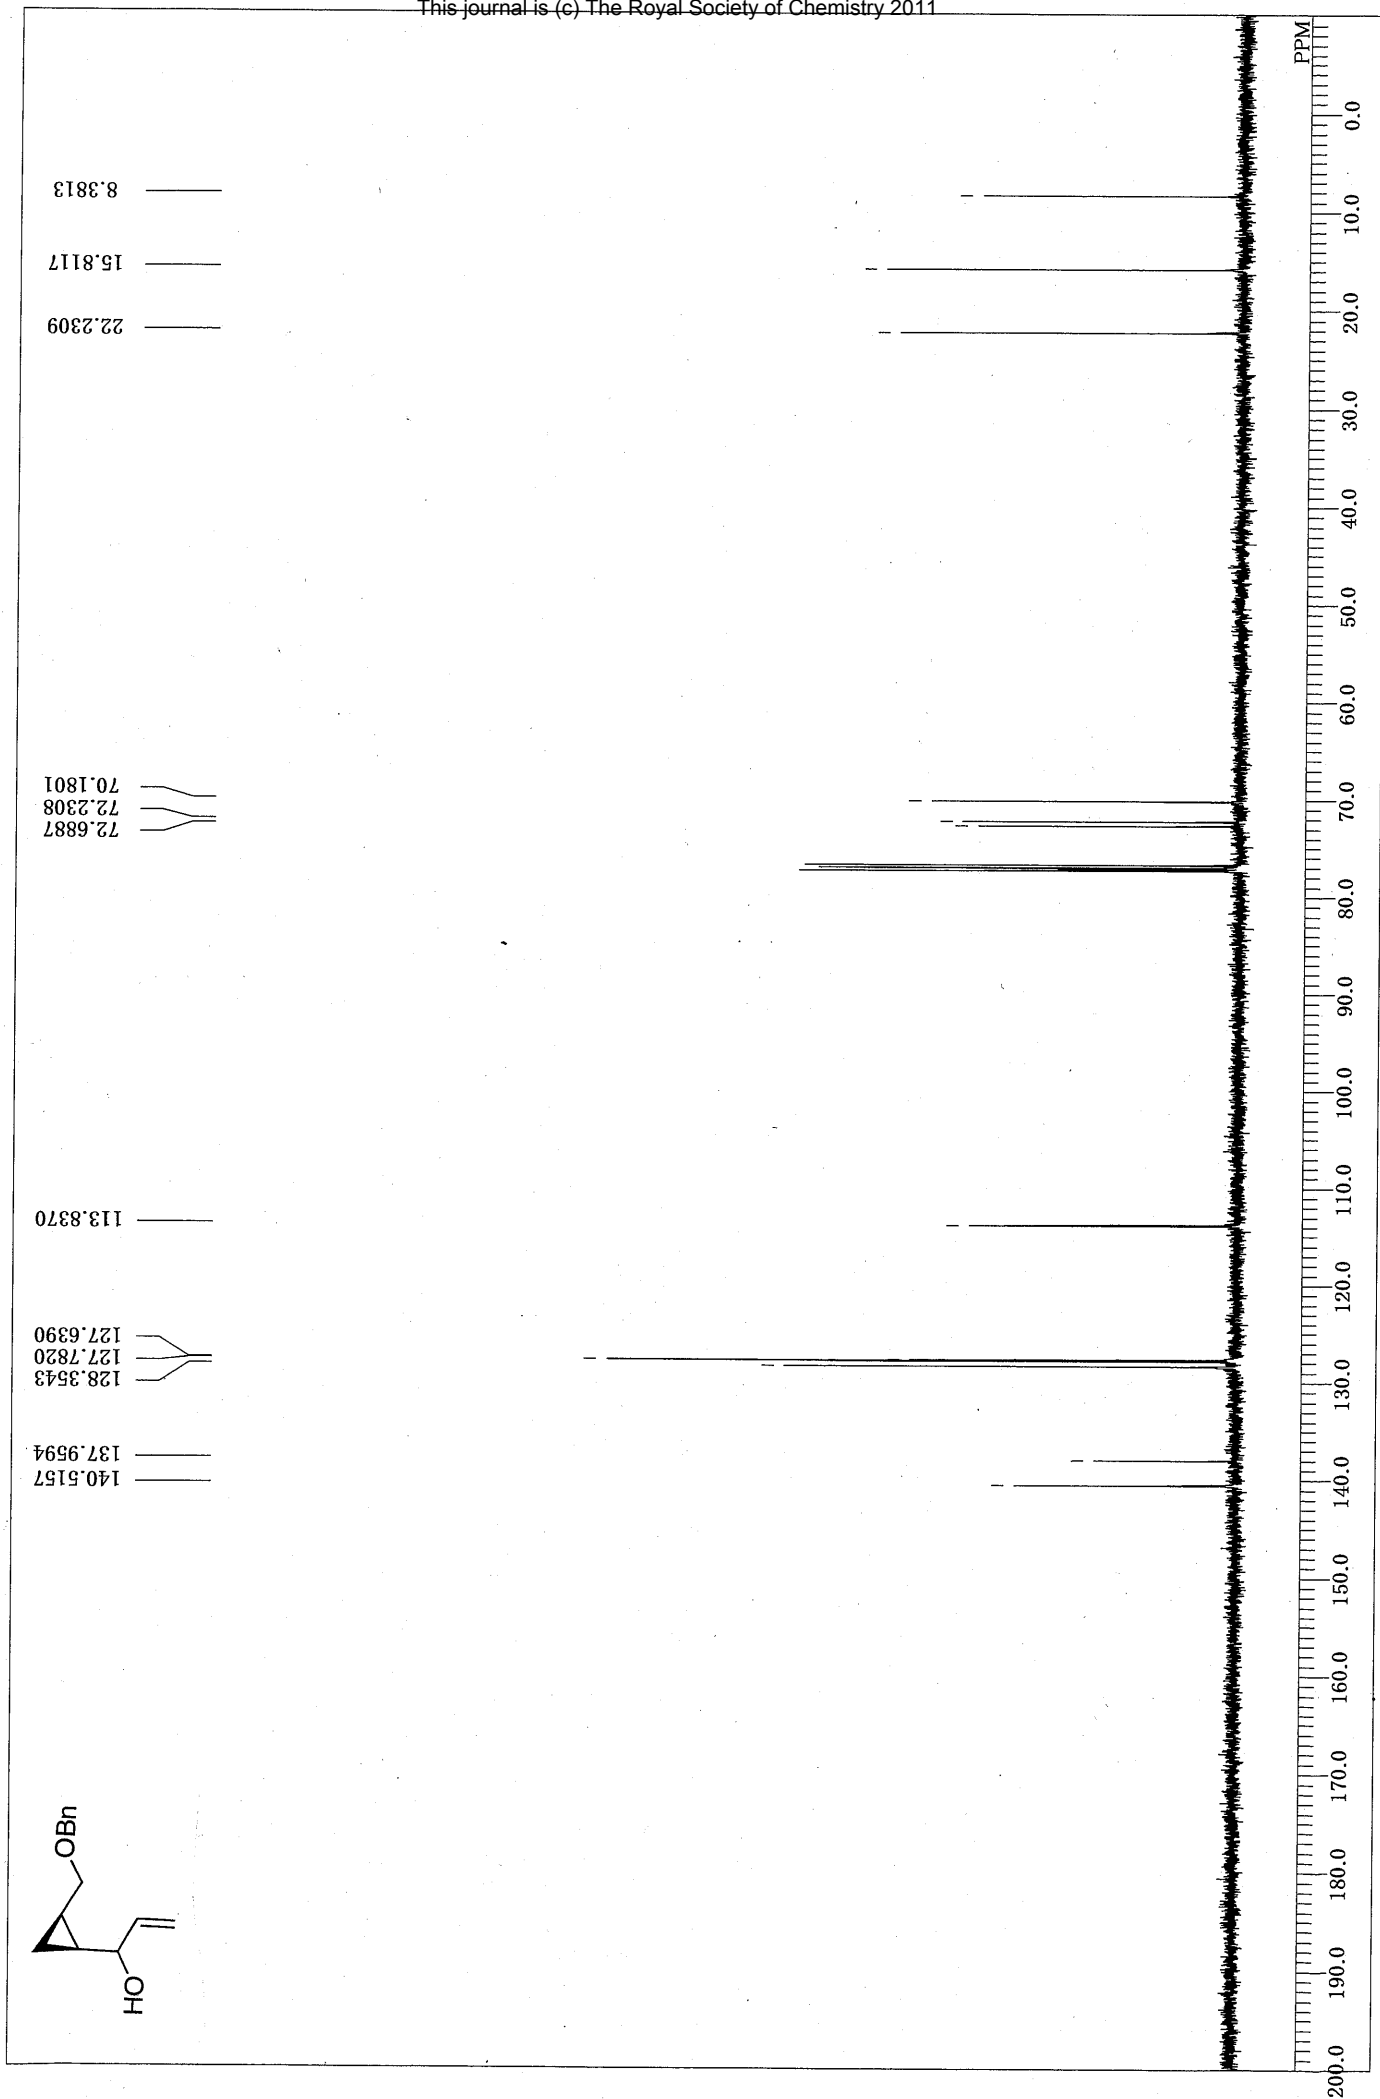

Supplement: c0ob00597e.pdf [file c0ob00597e.pdf]
